# Supplementary material for: Lipolysis of bone marrow adipocytes is required to fuel bone and the marrow niche during energy deficits
Source: eLife. 2022 Jun 22;11:e78496. doi: 10.7554/eLife.78496 (PMC9273217; doi:10.7554/eLife.78496)
Supplement: Figure 3—figure supplement 2—source data 1. [file elife-78496-fig3-figsupp2-data1.xlsx]

## Sheet: Sheet1
Figure 3 - figure supplement 2B						Figure 3 - figure supplement 2D
	Ct. BA/TA			Ct. Th			Ct. BA/TA			Ct. Th
	Pnpla2 +/+	Pnpla2 -/-		Pnpla2 +/+	Pnpla2 -/-		Pnpla2 +/+	Pnpla2 -/-		Pnpla2 +/+	Pnpla2 -/-
	60.69	52.59		0.243	0.194		51.07	46.71		0.195	0.192
	55.02	66.3		0.2	0.256		50.78	47.91		0.175	0.198
	53.59	64.52		0.218	0.241		54.44	53.85		0.182	0.223
	58.35	51.74		0.192	0.197		58.9	50.88		0.157	0.178
		57.26			0.203		51.19	50.96		0.192	0.196
		53.79			0.198		42	47.15		0.188	0.191
								50.61			0.17
Figure 3 - figure supplement 2E				Figure 3 - figure supplement 2F
	N.Ob/BS			N.Oc/BS			Oc.S/BS
	Pnpla2 +/+	Pnpla2 -/-		Pnpla2 +/+	Pnpla2 -/-		Pnpla2 +/+	Pnpla2 -/-
	11.4468	15.055		5.50604	4.00063		0.189927	0.161201
	20.2088	21.6488		4.31945	3.81084		0.160571	0.122202
	17.7097	20.7255		3.94319	5.396		0.145454	0.246231
	14.0831	11.2615		3.0548	3.12416		0.119295	0.12105
	20.2156	17.7874		3.96116	4.0038		0.175109	0.199407
		17.3376			4.23036			0.189668
		18.7775			3.59377			0.139184
Figure 3 - figure supplement 2G			Figure 3 - figure supplement 2H			Figure 3 - figure supplement 2I			Figure 3 - figure supplement 2J
	Serum P1NP			Serum RANKL			Serum CTX-1			Serum TRACP5b
	Pnpla2 +/+	Pnpla2 -/-		Pnpla2 +/+	Pnpla2 -/-		Pnpla2 +/+	Pnpla2 -/-		Pnpla2 +/+	Pnpla2 -/-
	45.573	40.645		174.602	217.451		11.989	10.781		1.90111	1.54325
	49.412	66.011		72	85.9645		11.395	9.59		1.84113	1.16594
	78.617	40.018		423.904	167.62		11.756	8.462		4.33995	1.87096
	52.173	52.987		228.843	70.9711		8.987	8.762		2.59724	1.68755
	78.936	44.187		45.4676	124.844		9.968	5.874		2.89087	1.20854
		47.014			142.778		11.834	9.363		3.10643	1.55199
		48.125			200.62					0.909709	2.03554
										1.89102
Figure 3 - figure supplement 2K			Figure 3 - figure supplement 2L			Figure 3 - figure supplement 2M			Figure 3 - figure supplement 2N
	Serum RANKL			Serum CTX-1			Osteoid S			Omt
	Pnpla2 +/+	Pnpla2 -/-		Pnpla2 +/+	Pnpla2 -/-		Pnpla2 +/+	Pnpla2 -/-		Pnpla2 +/+	Pnpla2 -/-
	88.9778	72		7.093	11.215		1.07629	1.4158		4.45316	4.75104
	33.4876	70.2361		4.442	7.019		1.8116	1.68419		2.9308	1.45775
	100.517	96.6215		8.262	4.365		1.06665	1.11845		3.89502	2.53455
	135.795	163.504		5.5	7.864		1.20536	1.04594		2.51258	1.63107
	100.223	150.274		8.437	4.568		1.54373	0.856988		2.51865	1.59077
	20.4786	83.0246		9.012	8.262		1.06256	0.968432		2.15232	2.22457
	71.4855	125.726		6.497	8.213		1.72366	1.01577		0.984011	1.76905
