# Supplementary material for: Lipolysis of bone marrow adipocytes is required to fuel bone and the marrow niche during energy deficits
Source: eLife. 2022 Jun 22;11:e78496. doi: 10.7554/eLife.78496 (PMC9273217; doi:10.7554/eLife.78496)
Supplement: Figure 3—figure supplement 3—source data 1. [file elife-78496-fig3-figsupp3-data1.xlsx]

## Sheet: Sheet1
Figure 3 - figure supplement 3A										Figure 3 - figure supplement 3B																					Figure 3 - figure supplement 3C
BW					Glucose					sWAT					pmWAT					Liver					Spleen						BMAT quantification
	Pnpla2 +/+		Pnpla2 -/-			Pnpla2 +/+		Pnpla2 -/-			Pnpla2 +/+		Pnpla2 -/-			Pnpla2 +/+		Pnpla2 -/-			Pnpla2 +/+		Pnpla2 -/-			Pnpla2 +/+		Pnpla2 -/-				Pnpla2 +/+		Pnpla2 -/-
	AL	CR	AL	CR		AL	CR	AL	CR		AL	CR	AL	CR		AL	CR	AL	CR		AL	CR	AL	CR		AL	CR	AL	CR			AL	CR	AL	CR
	26.97	18.33	26.02	24.17		183	104	123	115		0.5474	0.1876	0.3887	0.5304		0.9765	0.172	0.5358	0.5172		1.0916	0.8754	1.1661	1.0453		0.1956	0.0468	0.1122	0.0473			3.054	68.125	61.489	90.605
	24.39	19.92	24.12	20.33		148	141	144	112		0.3077	0.2693	0.3065	0.1859		0.4655	0.3461	0.3706	0.1126		1.7158	0.8898	1.075	0.8429		0.1105	0.0582	0.1123	0.0521			7.555	32.982	51.309	45.861
	25.06	19.2	23.42	21.14		139	134	169	120		0.4942	0.2071	0.2733	0.5672		0.7916	0.373	0.369	0.5961		0.9678	0.8442	1.1313	0.5427		0.092	0.0388	0.1004	0.0344			19.869	25.645	25.813	79.69
	23.48	16.12	23.37	18.75		148	99	203	106		0.3502	0.0913	0.3413	0.3332		0.6239	0.0533	0.538	0.4492		1.0796	0.7802	1.1235	0.8136		0.0743	0.0503	0.0753	0.0281			32.343	78.505	76.299	84.503
	22.52	19.48	27.64	22.11		142	137	123	125		0.2912	0.2079	0.4085	0.3377		0.418	0.2578	0.6072	0.3484		1.0155	0.8468	1.4351	1.0017		0.0766	0.055	0.1119	0.0632			2.452	57.692	33.552	47.225
	26.77	20.92	29	18.56		168	125	163	107		0.3916	0.324	0.5482	0.1491		0.5616	0.3863	0.7712	0.1253		1.3848	0.9951	1.4575	0.7674		0.0932	0.0434	0.1126	0.048			17.766	44.824	20.873	82.545
	24.08	20.06	26.81	20.78		175	128	152	89		0.3423	0.2825	0.5526	0.2617		0.5654	0.1926	1.1481	0.2077		1.0922	0.9554	1.2398	1.0096		0.1205	0.0469	0.0902	0.0522			19.971	15.377	44.979	67.831
			26.12	20.42				177	119				0.4031	0.25				0.7961	0.2784				1.257	0.952				0.1786	0.0657					38.775	79.233
			21.81	19.79				157	108				0.3061	0.3681				0.3889	0.3967				0.9476	0.8211				0.0848	0.0485					25.596	*
			22.56	20.16				157	133				0.3602	0.2858				0.3428	0.3657				0.8561	0.9177				0.0861	0.0409					*	*
																																* lost during sectioning
Two-way ANOVA
	Source of Variation	% of total variation	P value	P value summary		Source of Variation	% of total variation	P value	P value summary		Source of Variation	% of total variation	P value	P value summary		Source of Variation	% of total variation	P value	P value summary		Source of Variation	% of total variation	P value	P value summary		Source of Variation	% of total variation	P value	P value summary			Source of Variation	% of total variation	P value	P value summary
	Interaction	0.8315	0.3894	ns		Interaction	0.8435	0.4448	ns		Interaction	4.61	0.174	ns		Interaction	1.723	0.3559	ns		Interaction	0.01447	0.9303	ns		Interaction	0.01793	0.9077	ns			Interaction	0.01627	0.9184	ns
	Genotype	2.092	0.1761	ns		Genotype	1.129	0.3774	ns		Genotype	4.543	0.1771	ns		Genotype	0.1973	0.7532	ns		Genotype	0.1515	0.7773	ns		Genotype	0.03669	0.8683	ns			Genotype	25.9	0.0003	***
	Diet	64.93	<0.0001	****		Diet	51.73	<0.0001	****		Diet	22.36	0.0046	**		Diet	40.98	<0.0001	****		Diet	42.93	<0.0001	****		Diet	59.05	<0.0001	****			Diet	34.45	<0.0001	****
Figure 3 - figure supplement 3D																									Figure 3 - figure supplement 3E
Tb. BV/TV					Tb. BMD					Tb. N					Tb. Th					Tb. Sp					Ct. BV/TV
	Pnpla2 +/+		Pnpla2 -/-			Pnpla2 +/+		Pnpla2 -/-			Pnpla2 +/+		Pnpla2 -/-			Pnpla2 +/+		Pnpla2 -/-			Pnpla2 +/+		Pnpla2 -/-			Pnpla2 +/+		Pnpla2 -/-
	AL	CR	AL	CR		AL	CR	AL	CR		AL	CR	AL	CR		AL	CR	AL	CR		AL	CR	AL	CR		AL	CR	AL	CR
	31	24	17	26		253.885	183.28	126.058	189.747		5.2851	4.1612	4.0373	4.596		0.0651	0.0639	0.0626	0.0636		0.1745	0.2543	0.2479	0.2065		51	57	61	61
	24	31	13	31		206.815	259.814	92.0133	255.502		4.2008	4.9228	3.4013	4.4903		0.0632	0.0681	0.0671	0.0738		0.2329	0.1955	0.3248	0.2183		57	65	58	63
	11	24	16	36		77.461	189.657	126.508	284.517		2.9497	3.9767	4.36	5.844		0.0705	0.0659	0.0582	0.0631		0.3426	0.2541	0.2297	0.1569		59	54		53
	13	30	20	17		114.56	237.177	170.524	135.58		3.2573	5.2717	3.8553	3.8287		0.0648	0.0631	0.0711	0.0573		0.3147	0.1732	0.2805	0.2797		61	60	53	63
	13	19	14	21		116.896	125.699	126.508	143.665		3.5336	4.2111	3.4092	4.4285		0.0606	0.0553	0.0747	0.0583		0.2849	0.2418	0.2842	0.2239		53	60	65	59
	13	17	11	16		114.56	120.579	87.7015	97.6725		3.5677	3.9084	3.7071	3.6815		0.063	0.0512	0.0598	0.0567		0.2834	0.2506	0.2682	0.2652		60	56	57	59
	16	16	14	16		129.562	121.926	107.644	114.471		4.3856	3.6178	3.4608	3.9113		0.0624	0.0586	0.0641	0.0567		0.2243	0.2786	0.2875	0.2533		59	62	60	61
			14	13				112.584	75.6644				3.4732	3.7924				0.0667	0.0548				0.3079	0.2834				63	60
			26	16				198.551	116.896				4.8612	4.1202				0.0659	0.0576				0.2474	0.2312				64	65
			17	19				131.718	125.609				4.5789	4.0039				0.0612	0.0614				0.213	0.2651				62	66
Two-way ANOVA
	Source of Variation	% of total variation	P value	P value summary		Source of Variation	% of total variation	P value	P value summary		Source of Variation	% of total variation	P value	P value summary		Source of Variation	% of total variation	P value	P value summary		Source of Variation	% of total variation	P value	P value summary		Source of Variation	% of total variation	P value	P value summary
	Interaction	0.09283	0.8557	ns		Interaction	0.07282	0.8774	ns		Interaction	0.05143	0.8971	ns		Interaction	0.4582	0.688	ns		Interaction	0.00258	0.9764	ns		Interaction	0.7519	0.6177	ns
	Genotype	1.248	0.5065	ns		Genotype	3.093	0.3189	ns		Genotype	0.000488	0.99	ns		Genotype	0.02972	0.9184	ns		Genotype	0.151	0.821	ns		Genotype	10.78	0.0661	ns
	Diet	15.77	0.0233	*		Diet	6.575	0.1498	ns		Diet	9.147	0.0923	ns		Diet	14.48	0.0299	*		Diet	12.41	0.0472	*		Diet	3.008	0.3213	ns
Figure 3 - figure supplement 3F
WBC					Neutrophils					Lymphocytes					RBC					Hemoglobin					Platelets
	Pnpla2 +/+		Pnpla2 -/-			Pnpla2 +/+		Pnpla2 -/-			Pnpla2 +/+		Pnpla2 -/-			Pnpla2 +/+		Pnpla2 -/-			Pnpla2 +/+		Pnpla2 -/-			Pnpla2 +/+		Pnpla2 -/-
	AL	CR	AL	CR		AL	CR	AL	CR		AL	CR	AL	CR		AL	CR	AL	CR		AL	CR	AL	CR		AL	CR	AL	CR
	3.8	2.28	2.78	3.88		1.12	1.02	0.95	1.43		2.52	1.07	1.64	2.2		7.49	9.45	10.63	10.5		11.3	13.8	14.8	15.6		700	812	965	762
	4.04	2.84	3.24	3.5		2	0.93	1.03	1		1.64	1.82	2.08	2.38		8.93	9.22	9.87	8.79		13.4	14	14.5	13.2		983	736	1010	815
	2.42	5.3	1.88	4.5		0.42	1.14	0.68	2.87		1.84	4.02	1.05	1.47		9.99	10.39	9.21	9.35		13.5	14	12.9	13.3		756	997	901	656
	3.64	5.84	2.74	3.26		1.11	2.48	0.85	0.87		2.2	3.05	1.67	2.16		9.33	8.06	9.04	9.74		13.5	12.9	12.3	13.8		915	871	903	766
	2.86	3.82	3.42	1.86		0.63	0.87	1.58	0.57		2.17	2.89	1.56	1.21		9.21	9.87	7.67	8.84		11.4	13.5	11.5	13.2		1199	765	1013	702
	1.72	1.24	2.98	3.22		0.55	0.3	0.9	0.85		1.08	0.9	1.92	2.19		9.51	10.55	9.68	10.39		12.8	14.9	14.3	14.1		941	992	808	959
	1.88	2.06	2.14	2.18		0.56	0.7	0.61	0.88		1.23	1.26	1.4	1.19		8.97	9.61	9.77	10.37		13	13.3	13.1	14.5		801	860	882	770
			4.2	2.18				1.28	1.02				2.65	1.08				8.62	9.85				13.4	13.7				485	684
			2.88	2.3				1.29	0.73				1.39	1.44				10.74	10.12				14.5	14.3				931	825
			3.14	1.82				0.79	0.64				2.23	0.99				9.98	9.41				14.3	13.3				727	700
Two-way ANOVA
	Source of Variation	% of total variation	P value	P value summary		Source of Variation	% of total variation	P value	P value summary		Source of Variation	% of total variation	P value	P value summary		Source of Variation	% of total variation	P value	P value summary		Source of Variation	% of total variation	P value	P value summary		Source of Variation	% of total variation	P value	P value summary
	Interaction	1.451	0.508	ns		Interaction	0.112	0.8505	ns		Interaction	0.2722	0.769	ns		Interaction	0.9823	0.5728	ns		Interaction	3.592	0.2504	ns		Interaction	1.243	0.5137	ns
	Genotype	1.11	0.5623	ns		Genotype	5.465	0.194	ns		Genotype	6.435	0.16	ns		Genotype	3.564	0.2861	ns		Genotype	6.561	0.1237	ns		Genotype	6.029	0.1558	ns
	Diet	0.754	0.6327	ns		Diet	1.339	0.5158	ns		Diet	0.2162	0.7935	ns		Diet	5.466	0.1887	ns		Diet	13.37	0.0311	*		Diet	6.145	0.152	ns
