# Supplementary material for: Lipolysis of bone marrow adipocytes is required to fuel bone and the marrow niche during energy deficits
Source: eLife. 2022 Jun 22;11:e78496. doi: 10.7554/eLife.78496 (PMC9273217; doi:10.7554/eLife.78496)
Supplement: Figure 3—figure supplement 4—source data 1. [file elife-78496-fig3-figsupp4-data1.xlsx]

## Sheet: Sheet1
Figure 3 - figure supplement 4A
	Weeks	BMAd-Pnpla2+/+(Ad libitum)							BMAd-Pnpla2+/+ (CR)								BMAd-Pnpla2-/- (Ad libitum)							BMAd-Pnpla2-/- (CR)
	-2	26.8	21.8	23	24.5	22.8	23.5		24.2	24	21.6	22	20.8	21.2	24.8		22.1	22.3	21.6	20.2	21.6	18.5		25.5	22.2	21.9	22.8	24	20.3	20	23.5
	-1	25.6	22.1	24.4	24.5	23.3	23.5		23.7	24.7	22.2	21.1	21.5	21.9	23.8		21.8	22.4	21.5	20.5	22.7	18.4		24.4	22	22.1	22.5	25.7	21.5	20.7	24.7
	0	25.3	22.9	26.5	25.6	24.8	23.8		24.1	26	22.8	21.6	22	22.9	23.2		23.4	24	22	21.7	23.6	18.5		25.8	23.1	23.6	23.1	26.3	21.5	21.5	26.2
	1	25.9	23.8	27.1	25.8	23.9	23.5		20.9	23.1	20.3	21.6	19.6	20.9	21.6		24	25.3	22.8	21.7	24.8	19.4		21.6	20.8	20.8	19.5	21.8	19.2	19.6	23.1
	2	25.5	22.9	26.7	26.4	23.5	23.6		20	22.1	19.6	20.8	18.6	20.1	21.4		25.3	24.9	21.9	20.6	24.1	20		20.6	19.2	20.2	18.4	20.6	18.2	18.6	21.4
	3	27.8	23.1	28.2	28.1	24.1	23.8		19.5	22.1	19.6	20.5	18.7	19.4	22.4		25.5	26.1	22.4	21.9	24.2	20.3		19.9	18.9	19.7	17.2	21.2	17.2	18.7	21.9
	4	26.5	23	28.6	29.4	26.1	24.9		18.6	22	19.9	20	18.4	19.2	22.5		26.3	26.4	22.9	21.8	25.2	20.7		20.3	18.1	19.6	16.8	20.9	16.5	18.6	22.2
	5	24.1	23.2	28.9	30.3	26.1	24.4		18.8	22.6	20.1	20.6	19.1	19.1	23.5		27.1	27	22.4	21.8	24.9	20.4		20.8	18.7	20.2	16.3	21.2	17.3	19	23.6
	6	26	23.2	27.6	31.2	26.7	24.7		18.7	22.4	20.5	20.9	19	18.2	23.9		28.4	27.6	22.6	21.6	26.5	22		21.3	18.1	20.3	15.6	20.8	16.7	19	23.5
	7	26.8	23.7	27.7	32.2	26.3	25.3		18.8	22.5	20.6	20.9	19.6	18.2	22.6		29.3	28.9	22.3	21.9	26.6	22.1		22.1	17.9	20.4	15.8	20.9	17.1	19.4	23.5
	8	27.2	24.7	27.7	33.1	26.7	25.3		19.6	23	21.8	21.5	20.3	18.8	22.1		29.5	29.3	23	22.1	26.7	22		23	18.9	20.5	16	21.9	17.8	19.8	23.9
	9	26.6	23.4	28.3	31.9	25.9	24.5		18.9	22.8	21.5	22	20.3	18.6	20.8		29	28.1	22.1	21.8	25.9	21.3		22.8	18.6	20.1	15.8	21.3	16.4	19.4	23.8
	10	27.8	23.2	30.4	31.5	27	25		19.5	22.8	21.7	22.1	20.8	18.2	20.8		29.2	27.9	22.4	21.9	26.2	21.9		22.9	18.8	20.5	15.8	21.9	16.9	20.4	23.8
	11								20.3	23.5	21.9	22.7	21.2	18.6	20.7									23.7	18.8	21.2	16	22.1	17.1	20.5	23.8
	12	27.3	24.2	30	30.4	27.5	25.2		20.8	24.4	22.4	22.5	21.6	19.2	20.7		29.7	28.3	23	22	25.4	20.8		24.2	19.4	21.2	15.4	23.1	16.9	20.7	24.7
Figure 3 - figure supplement 4B
	Mins	BMAd-Pnpla2+/+(Ad libitum)							BMAd-Pnpla2+/+ (CR)								BMAd-Pnpla2-/- (Ad libitum)							BMAd-Pnpla2-/- (CR)
	0	76	71	70	63	71	63		68	56	63	67	58	73	67		70	84	64	75	50	74		67	49	61	69	85	66	56	57
	15	245	245	286	230	220	196		234	181	119	247	241	262	134		290	311	223	236	106	200		200	203	245	259	217	199	203	203
	30	204	190	252	190	173	200		173	151	125	197	161	224	126		180	234	157	180	138	188		188	180	208	172	188	152	183	229
	60	125	111	139	115	97	102		105	95	69	108	82	132	94		104	139	110	107	123	108		121	103	118	88	127	91	109	150
	90	105	96	110	82	96	92		79	93	71	73	62	96	91		97	114	76	95	105	92		111	76	89	96	101	76	84	103
	120	82	79	112	84	99	72		72	83	73	86	68	84	84		84	119	82	103	101	92		92	82	85	92	94	76	76	74
Figure 3 - figure supplement 4C
Femur length					Tibia length
	Pnpla2 +/+		Pnpla2 -/-			Pnpla2 +/+		Pnpla2 -/-
	Ad libitum	CR	Ad libitum	CR		Ad libitum	CR	Ad libitum	CR
	16.51	16.256	16.002	16.002		18.796	18.796	18.288	18.288
	17.526	16.256	16.51	16.256		18.288	18.542	18.796	18.288
	16.002	15.494	16.256	16.256		18.288	17.78	18.288	18.288
	16.256	16.256	16.256	16.256		18.542	18.288	18.542	18.288
	16.764	16.256	16.002	16.256		19.05	18.288	18.034	18.796
	16.764	16.256	15.24	15.494		19.05	18.288	17.272	17.526
		16.51		15.748			19.05		18.034
				16.256					18.288
Two-way ANOVA
	Source of Variation	% of total variation	P value	P value summary		Source of Variation	% of total variation	P value	P value summary
	Interaction	7.507	0.1336	ns		Interaction	2.302	0.4275	ns
	Genotype	16.82	0.0291	*		Genotype	15.84	0.0451	*
	Diet	6.228	0.17	ns		Diet	1.606	0.5066	ns
Figure 3 - figure supplement 4D
sWAT						pmWAT						Liver						Spleen						Uterus
	Pnpla2 +/+		Pnpla2 -/-		&		Pnpla2 +/+		Pnpla2 -/-		&		Pnpla2 +/+		Pnpla2 -/-		&		Pnpla2 +/+		Pnpla2 -/-		&		Pnpla2 +/+		Pnpla2 -/-		&
	Ad libitum	CR	Ad libitum	CR	Sham		Ad libitum	CR	Ad libitum	CR	Sham		Ad libitum	CR	Ad libitum	CR	Sham		Ad libitum	CR	Ad libitum	CR	Sham		Ad libitum	CR	Ad libitum	CR	Sham
	489	228.1	545	348.5	102.4		792.9	289.7	1541.4	622.6	69		1208.2	898.9	1157.3	1154.4	1381.7		168.7	50.4	108.7	55.5	111.7		22.3	25.1	21.8	16.8	135.8
	360.2	503.2	406.7	176.2	130.8		866.1	837.2	1536.1	153.5	221.6		1021.6	1186.8	1164.8	839.2	1349.9		113.2	81.2	103.4	35.2	98.9		25.9	21.1	11.7	18.7	90.5
	627.3	366.6	237.4	264.5	195.3		1467.5	660.8	521.6	342.1	442		1283.4	1070.7	962.5	889	1089		121.9	91.6	111.2	41	67.9		31.6	20.9	15.8	16.4	229
	635.2	262.4	239.9	58.4	279.5		1543	490.5	384		343		1228.4	930.6	988.5	703	1055		109.3	56.9	141.2	40	59.1		16	20.7	18.4	23.2	160.4
	449.3	205.7	270.9	212.4	135.8		831.3	433.2	919.7	313	189.8		1219.1	988.2	802.4	1258.1	1371.6		136.1	61.8	205.2	121.4	78.8		19.6	16.1	12.2	11.8	137.3
	385.1	194.1	356	180.9	181.1		621.4	144.4	590.4	46.2	387.1		1120.5	860	846	614.7	1216.1		109.9	32.6	89.9	24	90			17.9		37.1	108.2
		279.1		315.1				285.1		471.6				844.6		817.4				37.8		54.9						24.2
				245.6						503.7						1072.9						69.2
Two-way ANOVA
	Source of Variation	% of total variation	P value	P value summary			Source of Variation	% of total variation	P value	P value summary			Source of Variation	% of total variation	P value	P value summary			Source of Variation	% of total variation	P value	P value summary
	Interaction	2.139	0.3389	ns			Interaction	0.001428	0.9812	ns			Interaction	3.986	0.265	ns			Interaction	0.04607	0.8704	ns
	Genotype	14.55	0.018	*			Genotype	1.387	0.4649	ns			Genotype	11.48	0.0649	ns			Genotype	0.04215	0.876	ns
	Diet	31.8	0.001	**			Diet	43.44	0.0004	***			Diet	15.21	0.0356	*			Diet	60.64	<0.0001	****
Figure 3 - figure supplement 4F
Tb. BVF						Tb. BMD						Tb. N						Tb. Th						Tb. Sp
	Pnpla2 +/+		Pnpla2 -/-		&		Pnpla2 +/+		Pnpla2 -/-		&		Pnpla2 +/+		Pnpla2 -/-		&		Pnpla2 +/+		Pnpla2 -/-		&		Pnpla2 +/+		Pnpla2 -/-		&
	Ad libitum	CR	Ad libitum	CR	Sham		Ad libitum	CR	Ad libitum	CR	Sham		Ad libitum	CR	Ad libitum	CR	Sham		Ad libitum	CR	Ad libitum	CR	Sham		Ad libitum	CR	Ad libitum	CR	Sham
	10.2	16.99	8.21	15.25	17		78.9881	117.794	31.738	97.3132	153.995		3.2208	3.7358	2.9792	3.8993	3.3715		0.0704	0.0601	0.0555	0.0602	0.0703		0.3085	0.265	0.3333	0.2601	0.2998
	10.68	18.57	10.85	13.17	19		66.5018	132.077	59.4952	75.0356	160.822		3.6916	3.9322	3.638	4.4936	3.2823		0.0564	0.0644	0.0543	0.0558	0.0693		0.2629	0.2501	0.2597	0.2226	0.3177
	11.96	12.61	8.8	12.55	18		82.4016	94.3488	39.3734	70.4543	158.307		3.0946	3.4813	3.3244	3.8867	3.5657		0.0679	0.0647	0.0578	0.0545	0.0694		0.3285	0.2874	0.2938	0.2584	0.2819
	11.61	12.17	8.21	14.11	29		84.827	62.9985	31.6481	74.9458	235.291		3.3442	3.6701	2.8002	4.1605	4.4859		0.0628	0.0614	0.0609	0.0538	0.0668		0.3115	0.2689	0.3599	0.2451	0.2205
	9.69	17.3	8.27	8.92	17		59.9443	106.027	30.7498	26.0787	150.762		3.1786	3.9012	3.3531	3.983	4.2069		0.0618	0.0523	0.0667	0.0522	0.0742		0.3187	0.2602	0.3098	0.2485	0.2386
	9.55	11.59	12.82	12.24	17		65.6933	54.4647	96.5047	59.585	142.677		3.2587	4.1506	3.8347	3.6006	3.3594		0.0694	0.0528	0.052	0.0555	0.0663		0.2907	0.2429	0.2644	0.2799	0.2992
		15.29		13.35				90.3065		91.2048				3.5524		3.7292				0.0586		0.0568				0.3018		0.2621
Two-way ANOVA
	Source of Variation	% of total variation	P value	P value summary			Source of Variation	% of total variation	P value	P value summary			Source of Variation	% of total variation	P value	P value summary			Source of Variation	% of total variation	P value	P value summary			Source of Variation	% of total variation	P value	P value summary
	Interaction	0.853	0.5276	ns			Interaction	0.01856	0.9369	ns			Interaction	1.125	0.47	ns			Interaction	2.256	0.3808	ns			Interaction	1.203	0.493	ns
	Genotype	8.112	0.0604	ns			Genotype	20.04	0.0152	*			Genotype	1.851	0.356	ns			Genotype	23.47	0.0086	**			Genotype	1.198	0.494	ns
	Diet	45.02	0.0001	***			Diet	16.25	0.027	*			Diet	50.97	<0.0001	****			Diet	13.21	0.0416	*			Diet	42.94	0.0004	***
	&: this sham group was from a sex- and age- matched OVX independent cohort; therefore, it was not included for statistical analysis. Just for audience's reference.
