# Supplementary material for: Lipolysis of bone marrow adipocytes is required to fuel bone and the marrow niche during energy deficits
Source: eLife. 2022 Jun 22;11:e78496. doi: 10.7554/eLife.78496 (PMC9273217; doi:10.7554/eLife.78496)
Supplement: Figure 3—source data 1. [file elife-78496-fig3-data1.xlsx]

## Sheet: Sheet1
Figure 3B									Figure 3C
	Tb. BV/TV			Tb. Conn. Dens			Tb. BMD			Tb. N			Tb. Th			Tb. Sp
	Pnpla2 +/+	Pnpla2 -/-		Pnpla2 +/+	Pnpla2 -/-		Pnpla2 +/+	Pnpla2 -/-		Pnpla2 +/+	Pnpla2 -/-		Pnpla2 +/+	Pnpla2 -/-		Pnpla2 +/+	Pnpla2 -/-
	40.77	23.4		131.319	123.934		343.535	189.119		5.3919	4.8749		0.0813	0.0609		0.1623	0.1954
	28.54	31.81		159.463	131.376		229.811	278.678		5.2859	4.4889		0.0598	0.0772		0.1674	0.2109
	39.03	36.57		180.854	172.526		321.437	309.49		5.7988	5.3579		0.0716	0.0721		0.1469	0.1677
	35.05	32.04		172.479	175.709		291.254	256.85		5.7431	5.7952		0.068	0.0627		0.1513	0.1521
	31.1	29.47		142.067	170.228		256.221	245.801		5.4268	5.5351		0.0639	0.0647		0.1678	0.1692
	24.69	25.68		94.4004	136.326		206.456	198.551		4.7473	4.9695		0.0648	0.0641		0.1977	0.1813
	36.67	33.87		139.246	162.49		290.985	273.468		5.6424	5.6541		0.0708	0.0669		0.1505	0.1573
	26.35	19.5		102.795	96.6497		218.852	163.787		4.7524	4.3522		0.0653	0.0606		0.1945	0.221
	40.41	31.66		179.713	116.273		328.533	258.107		6.3419	4.7175		0.0716	0.073		0.1295	0.1919
	32.54	24.91		153.783	101.217		267.18	203.761		5.5444	4.1113		0.071	0.071		0.1577	0.2418
		32.38			110.547			269.156			4.84			0.0731			0.1991
		30.01			139.81			249.124			5.3308			0.0669			0.1677
		30.98			186.181			254.155			5.8729			0.0621			0.1495
Test details								Discovery?	P value	Mean of Pnpla2+/+	Mean of Pnpla2 -/-	Difference	SE of difference	t ratio	df	Adjusted P
Test name	Unpaired t test						Tb. BV/TV	No	0.075405	33.52	29.41	4.109	2.197	1.871	21	0.141305
Variance assumption	Individual variance for each row						Tb. Conn. Dens	No	0.677226	145.6	140.3	5.361	12.7	0.4221	21	0.711087
Multiple comparisons	False Discovery Rate (FDR)						Tb. BMD	No	0.089718	275.4	242.3	33.12	18.61	1.779	21	0.141305
Method	Two-stage step-up (Benjamini, Krieger, and Yekutieli)						Tb. N	No	0.089357	5.467	5.069	0.3982	0.2236	1.781	21	0.141305
Desired FDR (Q)	5.00%						Tb. Th	No	0.539311	0.06881	0.06733	0.001479	0.00237	0.6241	21	0.679532
							Tb. Sp	No	0.047355	0.1626	0.185	-0.02243	0.01065	2.107	21	0.141305
Figure 3E									Figure 3F
	Tb. BV/TV			Tb. Conn. Dens			Tb. BMD			Tb. N			Tb. Th			Tb. Sp
	Pnpla2 +/+	Pnpla2 -/-		Pnpla2 +/+	Pnpla2 -/-		Pnpla2 +/+	Pnpla2 -/-		Pnpla2 +/+	Pnpla2 -/-		Pnpla2 +/+	Pnpla2 -/-		Pnpla2 +/+	Pnpla2 -/-
	19.89	19.84		116.406	119.63		161.272	146.54		4.395	4.146		0.0525	0.0562		0.2153	0.2359
	19.95	16.53		141.138	85.0198		158.038	123.184		4.8182	4.1883		0.0512	0.0527		0.1925	0.2275
	20.15	23.19		122.255	137.899		155.163	176.453		4.6598	4.7411		0.0516	0.0566		0.2011	0.1966
	27.16	17.5		176.28	94.1064		206.456	128.664		5.8277	4.339		0.0534	0.0507		0.1548	0.2221
	26.64	19.37		141.306	128.595		216.337	152.558		4.9398	4.7392		0.0588	0.0519		0.1842	0.1949
	23.09	18.4		133.081	105.662		184.178	142.048		4.6219	4.4502		0.0575	0.0558		0.2025	0.2143
	28	18.48		166.231	139.05		216.876	139.892		5.8218	4.6024		0.0571	0.0512		0.1549	0.2055
	33	16		263.755	53.2475		255.951	132.526		6.591	3.6278		0.0558	0.0651		0.1308	0.2648
	34	25		207.516	122.556		275.893	205.378		6.3136	4.6345		0.057	0.0606		0.1368	0.2053
	22	26		125.74	158.78		178.429	205.917		4.9221	5.6043		0.0556	0.0565		0.1889	0.1585
	23	26		127.349	166.872		185.795	198.101		4.9811	5.2787		0.0572	0.0569		0.1846	0.1726
	17	24		113.055	121.996		134.772	185.885		4.7182	5.0254		0.0501	0.0577		0.2047	0.1824
	24	20		123.917	79.7912		192.532	167.29		4.8457	3.9951		0.0566	0.0655		0.1931	0.2353
		20			90.5637			158.397			4.3451			0.0605			0.2238
		16			86.068			132.436			4.2341			0.0518			0.2253
Test details								Discovery?	P value	Mean of Pnpla2+/+	Mean of Pnpla2 -/-	Difference	SE of difference	t ratio	df	Adjusted P
Test name	Unpaired t test						Tb. BV/TV	Yes	0.021333	24.45	20.42	4.032	1.646	2.45	26	0.00448
Variance assumption	Individual variance for each row						Tb. Conn. Dens	Yes	0.012824	150.6	112.7	37.96	14.2	2.673	26	0.003774
Multiple comparisons	False Discovery Rate (FDR)						Tb. BMD	Yes	0.014375	194	159.7	34.29	13.07	2.623	26	0.003774
Method	Two-stage step-up (Benjamini, Krieger, and Yekutieli)						Tb. N	Yes	0.00798	5.189	4.53	0.6588	0.2293	2.874	26	0.003774
Desired FDR (Q)	5.00%						Tb. Th	Yes	0.26821	0.05495	0.05665	-0.001693	0.001496	1.131	26	0.046937
							Tb. Sp	Yes	0.006283	0.1803	0.211	-0.03066	0.01031	2.973	26	0.003774
Figure 3G			Figure 3H						Figure 3I			Figure 3J
	N.Ob/BS			N.Oc/BS			Oc.S/BS			Serum P1NP			Serum TRACP5b
	Pnpla2 +/+	Pnpla2 -/-		Pnpla2 +/+	Pnpla2 -/-		Pnpla2 +/+	Pnpla2 -/-		Pnpla2 +/+	Pnpla2 -/-		Pnpla2 +/+	Pnpla2 -/-
	12.5427	11.735		2.44421	3.49078		0.06211	0.079151		82.929	37.356		1.57845	1.51722
	10.6593	11.9037		2.8486	3.69737		0.073164	0.098692		72.127	10.67		1.79214	0.996391
	16.553	16.1649		2.32563	5.4642		0.059	0.157567		69.212	35.651		1.0147	0.668679
	16.7636	18.1079		2.28594	4.18532		0.082606	0.099176		34.386	42.185		1.65979	0.769701
	15.448	21.8145		3.2376	4.97524		0.112448	0.148602		41.294	37.169		1.35996	1.61424
	11.3994	15.4591		3.92438	2.73846		0.12295	0.084123		55.374	46.618		2.63445	1.36791
	* one pair of mice was missed due to unsuccessful sectioning									48.972	44.187		1.97274	0.893351
Figure 3K			Figure 3L						Figure 3M
	O.Wi			sLS			MS			Ir.L.Wi			MAR
	Pnpla2 +/+	Pnpla2 -/-		Pnpla2 +/+	Pnpla2 -/-		Pnpla2 +/+	Pnpla2 -/-		Pnpla2 +/+	Pnpla2 -/-		Pnpla2 +/+	Pnpla2 -/-
	1.85679	0.877239		11.5047	10.4131		6.9954	5.20657		2.91872	3.6291		0.416959	0.518443
	1.65128	0.94805		11.6257	10.228		9.69457	7.18054		3.94397	4.55246		0.563425	0.650352
	1.52209	1.5237		17.4271	7.92424		9.65755	6.34033		2.73545	4.20819		0.390779	0.60117
	1.49114	1.37937		9.68099	7.22691		7.56115	5.75027		4.1543	5.9198		0.593471	0.845686
	1.36747	0.95687		10.1937	5.27564		7.20328	5.72069		3.80056	4.2106		0.542938	0.601514
	1.16632	1.3301		9.29146	9.62928		6.68351	7.75024		3.79322	4.18539		0.541889	0.597912
	0.777343	0.910434		10.5426	6.3943		9.06267	4.03605		5.52982	3.60252		0.789974	0.514646
		0.857615			8.80512			6.0632			3.37566			0.482237
Test details								Discovery?	P value	Mean of Pnpla2+/+	Mean of Pnpla2 -/-	Difference	SE of difference	t ratio	df	Adjusted P
Test name	Unpaired t test						O.Wi	No	0.076866	1.405	1.098	0.3067	0.1596	1.921	13	0.080709
Variance assumption	Individual variance for each row						sLS	Yes	0.018705	11.47	8.237	3.23	1.203	2.685	13	0.029461
Multiple comparisons	False Discovery Rate (FDR)						MS	Yes	0.005257	8.123	6.006	2.117	0.6325	3.346	13	0.01656
Method	Two-stage step-up (Benjamini, Krieger, and Yekutieli)						Ir.L.Wi	No	0.416393	3.839	4.21	-0.371	0.442	0.8394	13	0.262328
Desired FDR (Q)	5.00%						MAR	No	0.416393	0.5485	0.6015	-0.053	0.06314	0.8394	13	0.262328
