# Supplementary material for: Lipolysis of bone marrow adipocytes is required to fuel bone and the marrow niche during energy deficits
Source: eLife. 2022 Jun 22;11:e78496. doi: 10.7554/eLife.78496 (PMC9273217; doi:10.7554/eLife.78496)
Supplement: Figure 4—figure supplement 1—source data 1. [file elife-78496-fig4-figsupp1-data1.xlsx]

## Sheet: Sheet1
Figure 4 - figure supplement 1C
	WBC
	Days	BMAd-Pnpla2+/+ (AL)												BMAd-Pnpla2+/+ (CR)												BMAd-Pnpla2-/- (AL)										BMAd-Pnpla2-/- (CR)
	0	10.71	8.71	13.53	10.06	11.62	14.14	10.13	7.54	8	12.19	9.2		8.3	6.21	10.25	5.87	8.81	9.1	10.49	7.65	5.8	6.38	7.72		9.66	13.8	18.18	8.41	11.01	7.17	5.45	5.15	4.88		4.05	6.2	6.53	7.56	5.04	12.07	5.82	9.07	5.26
	2	1.49	1.57	1.11	2.42	1.27	1.43	1.09	1.26	1.07	1.6	1.25		1.83	1.64	2.31	1.1	2.16	2.07	2.66	1.81	1.28	0.92	1.99		1.55	1.44	1.26	1.39	1.49	1.1	1.08	1.17	1.55		1.55	1.45	0.71	1.63	1.17	1.68	1.16	1.65	1.44
	5	0.74	0.97	0.57	1	0.85	1.88	0.38	1.56	0.76	1.13	0.73		0.78	0.5	0.7	0.4	1.12	0.31	0.98	0.4	0.69	1.34	0.83		0.78	1.68	1.04	0.61	0.92	0.6	0.76	1.05	0.91		0.8	0.65	0.23	0.79	0.61	0.97	0.32	1.31	2.53
	8	2.62	1.58	2.55	2.69	2.63	1.1	3.19	3.73	1.96				2.62	2.23	0.68	1.18	3.4	2.11	2.4	2.53	2.91	2.06	4.13		2.24	2.79	3.68	1.85	3.78	3.36	2.63	3.65	2.67		2.21	3.33	1.77	2.77	2.9	3.2	1.91	2.8	3.72
	Neutrophils
	Days	BMAd-Pnpla2+/+ (AL)												BMAd-Pnpla2+/+ (CR)												BMAd-Pnpla2-/- (AL)										BMAd-Pnpla2-/- (CR)
	0	1.46	2.92	2.63	2.06	3.18	2.17	2.07	1.32	1.51	2.2	2		1.94	1.87	2.07	1.68	2.09	3.1	2.49	2.14	1.78	2.9	2.46		1.79	2.8	2.29	2.31	3.27	1.72	1.1	1.35	0.74		1.83	1.63	2.03	2.9	1.84	2.78	1.55	2.13	2.07
	2	1.06	1.22	0.64	1.78	0.93	0.99	0.93	0.73	0.7	1.1	0.77		1.4	1.25	1.58	0.77	1.59	1.3	2.06	1.35	0.84	0.71	1.53		0.82	1.01	0.91	1	1.07	0.76	0.54	0.77	1.25		1.07	1.02	0.48	0.89	0.72	1.18	0.81	1.12	1.01
	5	0.36	0.39	0.16	0.56	0.41	0.92	0.2	0.79	0.28	0.43	0.25		0.38	0.2	0.26	0.18	0.43	0.14	0.46	0.11	0.31	0.54	0.34		0.33	1.02	0.5	0.31	0.35	0.3	0.21	0.42	0.45		0.46	0.27	0.11	0.29	0.3	0.46	0.08	0.52	1.12
	8	1.59	0.7	1.39	1.24	1.56	0.65	1.38	2.28	0.65				1.34	1.48	0.36	0.5	2.07	1.11	1.43	1.53	1.65	1.18	2.56		1.39	1.79	2.4	1.14	1.92	1.71	1.13	2.41	1.5		1.45	1.73	0.97	1.5	1.66	1.87	1.09	1.42	2.46
	Lymphocytes
	Days	BMAd-Pnpla2+/+ (AL)												BMAd-Pnpla2+/+ (CR)												BMAd-Pnpla2-/- (AL)										BMAd-Pnpla2-/- (CR)
	0	8.33	2.88	9.75	6.56	6.6	10.87	7.17	5.07	5.81	9	6.31		5.52	3.27	7.08	2.92	4.89	2.61	6.69	4.79	3.25	3.04	4.58		5.95	9.72	14.76	5.31	6.4	4.84	2.96	3.49	3.65		1.74	3.88	3.55	1.5	2.71	8	3.81	6.03	2.62
	2	0.31	0.08	0.39	0.54	0.26	0.37	0.09	0.45	0.3	0.37	0.4		0.3	0.25	0.47	0.22	0.45	0.09	0.39	0.34	0.32	0.17	0.27		0.38	0.33	0.27	0.3	0.33	0.26	0.1	0.32	0.19		0.37	0.36	0.15	0.06	0.32	0.37	0.23	0.33	0.34
	5	0.24	0.01	0.31	0.25	0.27	0.45	0.12	0.32	0.36	0.44	0.34		0.24	0.19	0.35	0.17	0.5	0.06	0.32	0.23	0.24	0.5	0.34		0.28	0.31	0.35	0.18	0.42	0.2	0.21	0.39	0.27		0.18	0.23	0.09	0.15	0.18	0.34	0.2	0.51	0.85
	8	0.63	0.59	0.68	0.65	0.39	0.26	1	0.76	0.87				0.64	0.26	0.16	0.31	0.61	0.44	0.5	0.55	0.73	0.43	1		0.36	0.58	0.51	0.38	1.13	0.8	0.95	0.61	0.54		0.33	0.87	0.49	0.6	0.55	0.78	0.6	0.86	0.35
Three-way ANOVA	WBC							Neutrophils							Lymphocytes
	Source of Variation		% of total variation	P value	P value summary			Source of Variation		% of total variation	P value	P value summary			Source of Variation		% of total variation	P value	P value summary
	Time		77.48	<0.0001	****			Time		66.08	<0.0001	****			Time		70.05	<0.0001	****
	Genotype		0.09548	0.3633	ns			Genotype		0.006004	0.8659	ns			Genotype		0.1101	0.3912	ns
	Diet		0.8583	0.007	**			Diet		0.1055	0.4795	ns			Diet		1.714	0.0009	***
	Time x Genotype		0.6692	0.1254	ns			Time x Genotype		1.931	0.03	*			Time x Genotype		0.372	0.4778	ns
	Time x Diet		2.502	0.0001	***			Time x Diet		0.4275	0.5663	ns			Time x Diet		4.73	<0.0001	****
	Genotype x Diet		0.0002233	0.9649	ns			Genotype x Diet		0.1009	0.4892	ns			Genotype x Diet		0.003562	0.8773	ns
	Time x Genotype x Diet		0.02856	0.9692	ns			Time x Genotype x Diet		0.3388	0.657	ns			Time x Genotype x Diet		0.001719	0.9997	ns
Figure 4 - figure supplement 1D
	Monocytes
	Days	BMAd-Pnpla2+/+ (AL)												BMAd-Pnpla2+/+ (CR)												BMAd-Pnpla2-/- (AL)										BMAd-Pnpla2-/- (CR)
	0	0.56	2.35	0.55	0.85	1.13	0.57	0.51	0.83	0.51	0.45	0.56		0.54	0.83	0.76	1	1.2	2.95	0.67	0.35	0.6	0.25	0.46		1.55	0.77	0.62	0.54	0.77	0.36	1.12	0.18	0.27		0.26	0.49	0.64	2.85	0.32	0.89	0.34	0.62	0.4
	2	0.07	0.25	0.02	0.07	0.05	0.01	0.07	0.03	0.06	0.09	0.05		0.1	0.09	0.16	0.05	0.07	0.55	0.13	0.08	0.05	0.02	0.09		0.3	0.03	0.05	0.06	0.02	0.04	0.38	0.07	0.07		0.05	0.05	0.01	0.64	0.08	0.09	0.09	0.15	0.05
	5	0.09	0.49	0.06	0.12	0.11	0.38	0.05	0.12	0.02	0.1	0.04		0.12	0.08	0.05	0.04	0.12	0.09	0.15	0.05	0.08	0.05	0.03		0.15	0.26	0.15	0.09	0.09	0.08	0.21	0.05	0.05		0.09	0.1	0.02	0.26	0.1	0.11	0.02	0.08	0.13
	8	0.14	0.15	0.2	0.3	0.47	0.06	0.25	0.36	0.1				0.2	0.21	0.09	0.19	0.45	0.13	0.34	0.2	0.25	0.19	0.09		0.17	0.16	0.4	0.15	0.24	0.38	0.22	0.14	0.25		0.23	0.27	0.08	0.33	0.33	0.1	0	0.16	0.56
	Eosinophils
	Days	BMAd-Pnpla2+/+ (AL)												BMAd-Pnpla2+/+ (CR)												BMAd-Pnpla2-/- (AL)										BMAd-Pnpla2-/- (CR)
	0	0.35	0.47	0.51	0.54	0.67	0.51	0.34	0.3	0.14	0.51	0.3		0.27	0.24	0.32	0.24	0.6	0.41	0.62	0.35	0.15	0.18	0.21		0.3	0.42	0.46	0.24	0.56	0.24	0.24	0.12	0.22		0.2	0.19	0.3	0.29	0.16	0.36	0.11	0.27	0.17
	2	0.05	0.02	0.06	0.02	0.03	0.06	0	0.05	0.01	0.04	0.03		0.03	0.05	0.1	0.06	0.05	0.12	0.08	0.04	0.07	0.02	0.1		0.05	0.07	0.03	0.03	0.07	0.04	0.06	0.01	0.04		0.06	0.02	0.07	0.04	0.05	0.04	0.03	0.05	0.04
	5	0.03	0.08	0.04	0.04	0.05	0.09	0.01	0.27	0.05	0.07	0.04		0.04	0.03	0.04	0.01	0.06	0.02	0.04	0.01	0.06	0.13	0.04		0.02	0.05	0.03	0.03	0.06	0.02	0.09	0.07	0.06		0.07	0.05	0.01	0.09	0.02	0.06	0.02	0.09	0.1
	8	0.09	0.05	0.07	0.35	0.12	0.07	0.24	0.06	0.18				0.3	0.1	0.07	0.09	0.13	0.24	0.08	0.08	0.07	0.13	0.07		0.16	0.08	0.24	0.06	0.13	0.28	0.06	0.11	0.18		0.07	0.19	0.05	0.14	0.2	0.16	0.02	0.08	0.1
	Basophils
	Days	BMAd-Pnpla2+/+ (AL)												BMAd-Pnpla2+/+ (CR)												BMAd-Pnpla2-/- (AL)										BMAd-Pnpla2-/- (CR)
	0	0.01	0.09	0.09	0.05	0.04	0.02	0.04	0.02	0.03	0.03	0.03		0.03	0	0.02	0.03	0.03	0.03	0.02	0.02	0.02	0.01	0.01		0.07	0.09	0.05	0.01	0.01	0.01	0.03	0.01	0		0.02	0.01	0.01	0.02	0.01	0.04	0.01	0.02	0
	2	0	0	0	0.01	0	0	0	0	0	0	0		0	0	0	0	0	0.01	0	0	0	0	0		0	0	0	0	0	0	0	0	0		0	0	0	0	0	0	0	0	0
	5	0.02	0	0	0.03	0.01	0.04	0	0.06	0.05	0.09	0.06		0	0	0	0	0.01	0	0.01	0	0	0.12	0.08		0	0.04	0.01	0	0	0	0.04	0.12	0.08		0	0	0	0	0.01	0	0	0.11	0.33
	8	0.17	0.09	0.21	0.15	0.09	0.06	0.32	0.27	0.16				0.14	0.18	0	0.09	0.14	0.19	0.05	0.17	0.21	0.13	0.41		0.16	0.18	0.13	0.12	0.36	0.19	0.27	0.38	0.2		0.13	0.27	0.18	0.2	0.16	0.29	0.2	0.28	0.25
Three-way ANOVA	Monocytes							Eosinophils							Basophils
	Source of Variation		% of total variation	P value	P value summary			Source of Variation		% of total variation	P value	P value summary			Source of Variation		% of total variation	P value	P value summary
	Time		41.04	<0.0001	****			Time		59.95	<0.0001	****			Time		65.29	<0.0001	****
	Genotype		0.04975	0.7251	ns			Genotype		1.017	0.0321	*			Genotype		0.7634	0.0694	ns
	Diet		0.02336	0.8095	ns			Diet		0.8286	0.0527	ns			Diet		0.1082	0.4921	ns
	Time x Genotype		0.4431	0.7757	ns			Time x Genotype		2.318	0.0159	*			Time x Genotype		1.845	0.0482	*
	Time x Diet		0.2532	0.8889	ns			Time x Diet		1.857	0.0395	*			Time x Diet		0.1991	0.8318	ns
	Genotype x Diet		0.0005118	0.9715	ns			Genotype x Diet		0.0002492	0.973	ns			Genotype x Diet		0.09845	0.5122	ns
	Time x Genotype x Diet		0.0244	0.9961	ns			Time x Genotype x Diet		0.2099	0.8091	ns			Time x Genotype x Diet		0.1006	0.9314	ns
Figure 4 - figure supplement 1E
	RBC
	Days	BMAd-Pnpla2+/+ (AL)												BMAd-Pnpla2+/+ (CR)												BMAd-Pnpla2-/- (AL)										BMAd-Pnpla2-/- (CR)
	0	10.65	8.86	10.7	10.35	9.24	9.32	9.78	10.54	10.06	9.91	7.81		10.5	10.79	11.13	10.07	10.12	10.01	10.98	11.17	10.22	10.46	11.04		10.81	9.9	9.78	10.54	9.79	10.63	10.49	9.25	7.39		10.69	10.68	10.62	10.67	10.57	11.54	11.22	10.52	10.83
	2	10.06	8.57	10.54	9.96	9.17	8.76	8.35	10.21	9.49	9.35	8.35		10.09	9.4	9.28	9.2	9.48	9.37	10.19	10.43	8.24	9.72	9.92		10.58	8.65	9.71	9.32	9.17	9.95	9.19	9.01	9		9.85	9.87	8.93	10.05	9.31	10.53	8.63	9.61	9.71
	5	10.46	7	7.24	8.3	8.61	7.71	7.25	5.39	7.19	7.51	6.99		8.82	8.36	8.72	8.17	8	8.04	9.21	8.55	6.88	7.71	7.15		7.7	7.61	7.86	8.66	7.22	7.45	7.92	6.71	6.86		8.19	8.28	7.79	8.49	8.04	7.33	8.13	6.47	8.02
	8	8.1	6.64	7.53	6.43	7.12	5.21	9.29	7.61	7.33				6.63	6.44	7.29	8.11	7.28	5.86	7.62	7.69	5.6	7.25	7.49		6.37	7.13	6.63	6.9	9.86	8.16	8.79	6.34	6.7		7	7.8	6.59	7.37	5.33	7.55	7.37	7.02	7.46
	Hematocrit
	Days	BMAd-Pnpla2+/+ (AL)												BMAd-Pnpla2+/+ (CR)												BMAd-Pnpla2-/- (AL)										BMAd-Pnpla2-/- (CR)
	0	46.5	40.1	46	45.9	41	39.7	43	45	41.8	42.3	33.5		46.8	46.9	48.1	46.9	45.2	42.3	48.7	47.4	46	44.8	46.6		47.7	44.2	43.4	45.1	42.5	44.1	44.1	39.7	31.9		46.9	47.9	45.6	46.1	46.5	50.2	47.3	46.7	46.9
	2	43.5	38.4	45.4	44.7	40.8	37.3	36.5	43.4	39.6	39.9	34.7		45.2	41.1	41.1	42.9	42.6	40.3	45.4	44.4	38.2	42.4	41.2		46.5	38.9	42.9	40.2	39.9	41.9	38.6	37.4	37.5		43.7	44.6	39.3	43.8	41.9	45.8	37.1	43.1	41.4
	5	45	32	31.8	38.2	39.2	33.5	32.5	24	31.4	33.5	30.6		40.7	37.8	39.6	38.3	36.6	35.1	41.6	37.2	32.9	35.4	32.1		34.6	34.8	35.3	38.4	32	32.5	34.7	30.2	30.6		37.2	38.1	35.2	37.5	37	32	36.2	30.2	37
	8	37.1	30.1	37.5	30.3	34.3	25.3	43.1	36.4	33.5				33.3	30.3	33.7	41.3	36.4	27.6	37.1	35.3	29	33.6	35.5		28.6	34.5	33.1	32.6	47	39.3	41.9	29.4	31		33.4	38	31.1	33.6	26	36.2	34.5	35	35
	Platelets
	Days	BMAd-Pnpla2+/+ (AL)												BMAd-Pnpla2+/+ (CR)												BMAd-Pnpla2-/- (AL)										BMAd-Pnpla2-/- (CR)
	0	1527	1267	504	1033	1146	752	1235	871	1819	1324	1124		1198	695	1007	1277	1435	919	1243	1712	1339	1131	960		539	1329	1640	1316	1694	952	218	1373	1374		1106	1053	1104	808	1399	918	1759	1046	1217
	2	1560	952	1149	1563	1035	1161	1742	778	1589	1552	1426		1131	617	1350	1236	1721	1136	1414	1549	1461	1418	1053		1021	1531	1547	1034	1626	919	628	1756	2134		779	940	1130	975	1047	1153	1498	1485	1412
	5	766	925	1230	596	838	687	658	611	1266	995	434		658	534	1377	819	1256	564	1100	1132	1210	966	778		559	1197	983	778	1084	660	477	1215	1271		961	488	930	776	1127	1660	1586	1608	843
	8	403	343	171	288	399	220	613	492	351				403	303	292	408	351	151	623	393	406	641	562		456	199	507	308	473	214	298	441	272		631	400	279	375	344	336	570	859	463
Three-way ANOVA	RBC							Hematocrit							Platelets
	Source of Variation		% of total variation	P value	P value summary			Source of Variation		% of total variation	P value	P value summary			Source of Variation		% of total variation	P value	P value summary
	Time		68.77	<0.0001	****			Time		56.44	<0.0001	****			Time		54.94	<0.0001	****
	Genotype		0.01402	0.7874	ns			Genotype		0.002031	0.93	ns			Genotype		0.09103	0.5809	ns
	Diet		1.104	0.0178	*			Diet		2.922	0.0011	**			Diet		0.1513	0.4768	ns
	Time x Genotype		0.1768	0.8203	ns			Time x Genotype		0.196	0.8617	ns			Time x Genotype		0.5094	0.635	ns
	Time x Diet		2.104	0.0141	*			Time x Diet		2.698	0.0188	*			Time x Diet		1.312	0.225	ns
	Genotype x Diet		0.01296	0.7954	ns			Genotype x Diet		0.0549	0.6478	ns			Genotype x Diet		0.00451	0.9022	ns
	Time x Genotype x Diet		0.0549	0.9625	ns			Time x Genotype x Diet		0.1275	0.9216	ns			Time x Genotype x Diet		0.2777	0.8172	ns
Figure 4 - figure supplement 1F
HSC	Pnpla2 +/+		Pnpla2 -/-		MPP	Pnpla2 +/+		Pnpla2 -/-		HPC1	Pnpla2 +/+		Pnpla2 -/-		HPC2	Pnpla2 +/+		Pnpla2 -/-
	Ad libitum	CR	Ad libitum	CR		Ad libitum	CR	Ad libitum	CR		Ad libitum	CR	Ad libitum	CR		Ad libitum	CR	Ad libitum	CR
	1.32165	0.505159	1.33619	0.0915296		2.13319	3.36773	3.1317	0.824117		0.857912	0.769766	0.751608	0.350688		0.950659	0.240552	0.542828	0.148867
	0.741234	0.171062	0.218986	0.176977		2.47078	1.4949	4.49779	2.57421		1.46346	0.321688	0.562224	0.40222		0.912288	0.112212	0.157704	0.176977
	0.314652	0.468333	1.08985	0.50232		1.59424	1.98141	2.4312	0.14352		0.650281	0.648461	1.14574	0.18837		0.230745	0.273073	0.614786	0.14352
	0.39273	0.176327	0.228333	0.211224		2.4804	1.95052	1.82882	1.02092		0.51675	0.52664	0.537888	0.26403		0.33072	0.225139	0.158139	0.211224
	0.249206	0.176427	0.76649	0.779002		3.38879	0.88009	2.20534	1.15227		0.625622	0.36841	0.457205	0.632939		0.199417	0.100795	0.230216	0.275896
	1.79652	0.233501	0.318178	0.0654545		2.84341	1.88746	2.65148	2.22222		0.723778	0.272418	0.7159	0.343434		0.122525	0.0412165	0.556811	0.282828
	0.816504	0.0548852	0.519584	0.122724		3.26602	0.925267	2.85771	0.789906		1.27919	0.273374	0.707637	0.77064		1.03424	0.102086	0.363709	0.327522
	1.44717	0.145868	1.2928	1.07309		2.93842	1.7821	2.44951	2.11099		0.808064	0.308017	0.382434	0.351832		0.216953	0.0568494	0.189429	0.43979
	1.51579	0.0505328	0.645039	0.0711384		3.45706	2.29694	2.54956	1.38238		0.452078	0.267977	*7.014384	0.248518		0.292521	0.13162	0.112691	0.170856
	1.19028	0.149526				3.33278	2.2152				1.82926	0.35074				0.731702	*0.630448
	* values were identified as outlier by prism software
Two-way ANOVA	Source of Variation	% of total variation	P value	P value summary		Source of Variation	% of total variation	P value	P value summary		Source of Variation	% of total variation	P value	P value summary		Source of Variation	% of total variation	P value	P value summary
	Interaction	4.069	0.1406	ns		Interaction	1.637	0.3288	ns		Interaction	3.044	0.2084	ns		Interaction	7.721	0.0667	ns
	Genotype	0.4735	0.6101	ns		Genotype	2.538	0.2257	ns		Genotype	3.884	0.1567	ns		Genotype	0.6104	0.5975	ns
	Diet	33.35	0.0001	***		Diet	39.89	<0.0001	****		Diet	29.78	0.0003	***		Diet	19.82	0.0046	**
Figure 4 - figure supplement 1G
GMP	Pnpla2 +/+		Pnpla2 -/-		PreGM	Pnpla2 +/+		Pnpla2 -/-		PreMegE	Pnpla2 +/+		Pnpla2 -/-		PreCFUe	Pnpla2 +/+		Pnpla2 -/-
	Ad libitum	CR	Ad libitum	CR		Ad libitum	CR	Ad libitum	CR		Ad libitum	CR	Ad libitum	CR		Ad libitum	CR	Ad libitum	CR
	2.06363	2.40552	2.71414	2.63016		6.90967	3.51964	4.21736	2.40221		4.86923	1.11645	6.2634	0.613704		5.1011	2.64607	6.68096	3.50688
	2.93675	1.66521	2.53001	2.09154		5.66379	2.48577	7.0278	3.16949		3.56606	1.2609	2.2489	0.820529		7.98252	3.21688	3.09223	1.93066
	1.90164	2.70192	4.75062	0.49335		3.98559	3.99857	6.48319	0.39468		3.1005	1.61893	7.82454	0.87906		5.03443	7.02499	5.03006	1.2558
	2.16361	1.32635	1.74814	1.16173		3.12117	2.84494	5.10994	2.30586		3.64946	1.4327	3.22733	2.11224		2.8938	2.14557	2.68944	1.61938
	4.39436	2.86541	1.47919	1.62292		6.96005	3.67664	3.03907	2.04488		3.1019	1.67342	1.53298	1.4444		2.47642	2.45606	1.47919	3.57042
	2.72168	2.03232	2.65148	1.85858		8.84043	4.43652	5.78023	3.97979		2.72168	0.651893	3.44692	0.90909		3.61889	2.52959	5.03781	1.9798
	1.98343	1.0935	2.61281	1.9266		4.62686	2.37625	5.8713	6.99356		2.93842	0.638035	10.3917	0.886236		6.25986	1.66128	2.28621	0.48165
	2.92521	1.38608	1.88667	2.81466		2.84047	2.42013	3.7287	3.30722		2.65928	0.459389	2.25899	1.93508		4.16276	1.34207	2.14163	5.27748
	3.57084	1.2059	*7.79376	1.86389		6.14294	2.81376	3.41641	2.23667		4.04695	0.94146	1.45325	0.38831		3.19114	2.87118	*17.406064	2.17454
	*9.451156	1.3845				4.49926	3.34126				* 11.280412	*4.089384				*12.616968	3.3228
	* values were identified as outlier by prism software
Two-way ANOVA	Source of Variation	% of total variation	P value	P value summary		Source of Variation	% of total variation	P value	P value summary		Source of Variation	% of total variation	P value	P value summary		Source of Variation	% of total variation	P value	P value summary
	Interaction	0.3893	0.6888	ns		Interaction	0.06716	0.8528	ns		Interaction	1.059	0.4385	ns		Interaction	0.4506	0.6733	ns
	Genotype	0.2435	0.7513	ns		Genotype	0.7144	0.5462	ns		Genotype	1.168	0.4161	ns		Genotype	4.405	0.1928	ns
	Diet	22.72	0.0041	**		Diet	33.61	0.0002	***		Diet	42.7	<0.0001	****		Diet	15.26	0.0187	*
