# Supplementary material for: Lipolysis of bone marrow adipocytes is required to fuel bone and the marrow niche during energy deficits
Source: eLife. 2022 Jun 22;11:e78496. doi: 10.7554/eLife.78496 (PMC9273217; doi:10.7554/eLife.78496)
Supplement: Figure 4—source data 1. [file elife-78496-fig4-data1.xlsx]

## Sheet: Sheet1
Figure 4A					Figure 4B					Figure 4C					Figure 4D
	BMNC					Monocytes					B cells					T cells
	Ad libitum		CR			Ad libitum		CR			Ad libitum		CR			Ad libitum		CR
	Pnpla2 +/+	Pnpla2 -/-	Pnpla2 +/+	Pnpla2 -/-		Pnpla2 +/+	Pnpla2 -/-	Pnpla2 +/+	Pnpla2 -/-		Pnpla2 +/+	Pnpla2 -/-	Pnpla2 +/+	Pnpla2 -/-		Pnpla2 +/+	Pnpla2 -/-	Pnpla2 +/+	Pnpla2 -/-
	2.31868	2.0878	1.89228	1.75344		1.09755	0.688974	0.965063	0.87672		11.006	9.08193	9.26125	3.314		19.2072	19.855	17.416	7.645
	2.09768	2.81112	1.95052	1.60888		0.98591	1.34934	1.15282	0.168932		5.74764	9.2767	9.40463	14.3673		11.2855	18.9469	11.3348	26.3856
	2.60676	2.79448	2.04672	0.897		0.90948	1.3693	0.955755	0.49335		4.21668	8.71878	7.5095	3.07671		16.7014	13.1061	15.7212	6.74544
	2.58492	2.68944	1.94584	1.7602		1.51192	0.645466	0.839155	0.545662		4.09261	4.62584	3.8683	4.96376		11.183	8.92894	6.2425	5.50943
	2.72168	2.68944	1.84756	1.62292		1.11152	1.61366	0.443414	0.60048		3.1536	9.78956	8.05536	1.50932		9.46081	24.5815	15.1315	8.86114
	2.44868	2.65148	2.10288	2.0202		1.38806	1.74998	0.992378	1.0505		9.33536	8.08701	4.02789	2.70707		29.122	28.3708	8.05578	7.65656
	2.65928	2.72168	2.20012	1.9266		0.563196	0.408252	0.651893	0.406513		5.7544	1.85074	3.40667	18.8807		15.1818	24.7842	11.1873	30.6329
	2.38056	2.54956	1.91412	1.75916		0.957341	0.86685	0.858047	0.826805		5.26537	6.57786	2.59614	10.5726		12.2327	5.33449	8.29445	14.4251
			1.846	1.55324				0.746507	0.419375				2.98603	2.2056				9.51318	9.9718
			2.067					1.32912					9.0454					23.6288
	Source of Variation	% of total variation	P value	P value summary		Source of Variation	% of total variation	P value	P value summary		Source of Variation	% of total variation	P value	P value summary		Source of Variation	% of total variation	P value	P value summary
	Interaction	7.16	0.0048	**		Interaction	4.492	0.1761	ns		Interaction	0.05353	0.8974	ns		Interaction	0.4738	0.6913	ns
	Diet	68.75	<0.0001	****		Diet	19.65	0.0069	**		Diet	0.09254	0.8654	ns		Diet	7.176	0.1289	ns
	Genotype	1.021	0.2603	ns		Genotype	3.383	0.2387	ns		Genotype	1.745	0.4634	ns		Genotype	0.9819	0.5681	ns
Figure 4E					Figure 4F					Figure 4G					Figure 4H
	Neutrophils					PreNeutrophils					Immature Neutrophils					Mature Neutrophils
	Ad libitum		CR			Ad libitum		CR			Ad libitum		CR			Ad libitum		CR
	Pnpla2 +/+	Pnpla2 -/-	Pnpla2 +/+	Pnpla2 -/-		Pnpla2 +/+	Pnpla2 -/-	Pnpla2 +/+	Pnpla2 -/-		Pnpla2 +/+	Pnpla2 -/-	Pnpla2 +/+	Pnpla2 -/-		Pnpla2 +/+	Pnpla2 -/-	Pnpla2 +/+	Pnpla2 -/-
	1.67987	1.20675	1.41445	1.15902		1.74706	1.71358	1.51346	0.707005		9.22247	5.67172	7.25611	6.86142		6.88745	5.87686	6.35086	4.32316
	1.42432	1.89751	1.19592	0.74652		1.43857	2.27701	1.54274	1.14964		7.62014	8.57673	6.69716	3.68035		6.06762	9.71523	4.74781	3.47878
	1.31875	1.93937	1.25418	0.59202		1.3715	1.95876	1.26673	0.562419		7.05529	9.61927	6.30855	3.635		5.78929	9.07625	5.80687	2.06023
	1.95507	2.15962	1.6517	1.20926		2.24833	1.66291	1.18923	0.773925		8.2895	10.3014	8.70448	6.03419		10.6356	10.6685	7.25098	5.67142
	2.00331	1.67552	1.14733	1.16201		2.40398	1.49121	1.27354	1.12715		10.9181	7.60687	7.58388	6.30972		8.47401	8.5284	3.40758	4.83396
	1.50237	1.54581	1.42241	1.49293		1.27701	1.8086	1.74956	1.35856		8.48838	8.14643	7.21161	6.74803		5.99445	6.78612	6.47196	7.64379
	1.55246	2.28893	1.54562	1.22917		1.64561	2.10582	1.17467	1.24146		8.22805	10.9869	7.88265	4.46189		6.79979	11.1242	7.04801	6.20731
	1.89341	1.85608	1.65449	0.937632		2.06381	1.23066	1.05887	1.744		7.6115	6.56029	7.75956	4.90382		10.7167	11.9346	8.27245	4.02244
			1.41453	1.08882				1.17406	0.718622				6.36541	4.47506				7.25656	6.05385
			0.934076					1.7654					3.92312					4.99731
	Source of Variation	% of total variation	P value	P value summary		Source of Variation	% of total variation	P value	P value summary		Source of Variation	% of total variation	P value	P value summary		Source of Variation	% of total variation	P value	P value summary
	Interaction	8.402	0.0228	*		Interaction	3.455	0.1679	ns		Interaction	5.417	0.0788	ns		Interaction	8.867	0.0304	*
	Diet	46.23	<0.0001	****		Diet	40.19	<0.0001	****		Diet	38.86	<0.0001	****		Diet	38.55	<0.0001	****
	Genotype	0.8121	0.4618	ns		Genotype	3.188	0.1847	ns		Genotype	5.36	0.0803	ns		Genotype	0.1057	0.806	ns
Figure 4I					Figure 4J					Figure 4K					Figure 4L
	CFU-G					CFU-M					CFU-GM					CFU (G+M+GM)
	Ad libitum		CR			Ad libitum		CR			Ad libitum		CR			Ad libitum		CR
	Pnpla2 +/+	Pnpla2 -/-	Pnpla2 +/+	Pnpla2 -/-		Pnpla2 +/+	Pnpla2 -/-	Pnpla2 +/+	Pnpla2 -/-		Pnpla2 +/+	Pnpla2 -/-	Pnpla2 +/+	Pnpla2 -/-		Pnpla2 +/+	Pnpla2 -/-	Pnpla2 +/+	Pnpla2 -/-
	19	22	24	19		49	19	10	13		83	63	62	73		151	104	96	105
	26	27	29	10		41	31	18	12		79	72	78	55		146	130	125	77
	21	18	27	17		49	19	25	18		89	79	76	54		159	116	128	89
	13	21	14	14		39	20	11	14		90	80	73	50		142	121	98	78
	27	17	17	15		32	31	15	12		86	75	66	48		145	123	98	75
	18	26	14	16		46	38	17	10		83	80	69	62		147	144	100	88
	Source of Variation	% of total variation	P value	P value summary		Source of Variation	% of total variation	P value	P value summary		Source of Variation	% of total variation	P value	P value summary		Source of Variation	% of total variation	P value	P value summary
	Interaction	10.72	0.1063	ns		Interaction	6.942	0.0129	*		Interaction	0.5504	0.5337	ns		Interaction	0.0973	0.7472	ns
	Diet	9.696	0.1234	ns		Diet	60.44	<0.0001	****		Diet	46.49	<0.0001	****		Diet	59.79	<0.0001	****
	Genotype	4.647	0.2786	ns		Genotype	13.99	0.0009	***		Genotype	25.52	0.0003	***		Genotype	21.89	<0.0001	****

## Sheet: Sheet2
Figure 4A					Figure 4B					Figure 4C					Figure 4D
	BMNC					Monocytes					B cells					T cells
	Pnpla2 +/+		Pnpla2 -/-			Pnpla2 +/+		Pnpla2 -/-			Pnpla2 +/+		Pnpla2 -/-			Pnpla2 +/+		Pnpla2 -/-
	Ad libitum	CR	Ad libitum	CR		Ad libitum	CR	Ad libitum	CR		Ad libitum	CR	Ad libitum	CR		Ad libitum	CR	Ad libitum	CR
	2.31868	1.89228	2.0878	1.75344		1.09755	0.965063	0.688974	0.87672		11.006	9.26125	9.08193	3.314		19.2072	17.416	19.855	7.645
	2.09768	1.95052	2.81112	1.60888		0.98591	1.15282	1.34934	0.168932		5.74764	9.40463	9.2767	14.3673		11.2855	11.3348	18.9469	26.3856
	2.60676	2.04672	2.79448	0.897		0.90948	0.955755	1.3693	0.49335		4.21668	7.5095	8.71878	3.07671		16.7014	15.7212	13.1061	6.74544
	2.58492	1.94584	2.68944	1.7602		1.51192	0.839155	0.645466	0.545662		4.09261	3.8683	4.62584	4.96376		11.183	6.2425	8.92894	5.50943
	2.72168	1.84756	2.68944	1.62292		1.11152	0.443414	1.61366	0.60048		3.1536	8.05536	9.78956	1.50932		9.46081	15.1315	24.5815	8.86114
	2.44868	2.10288	2.65148	2.0202		1.38806	0.992378	1.74998	1.0505		9.33536	4.02789	8.08701	2.70707		29.122	8.05578	28.3708	7.65656
	2.65928	2.20012	2.72168	1.9266		0.563196	0.651893	0.408252	0.406513		5.7544	3.40667	1.85074	18.8807		15.1818	11.1873	24.7842	30.6329
	2.38056	1.91412	2.54956	1.75916		0.957341	0.858047	0.86685	0.826805		5.26537	2.59614	6.57786	10.5726		12.2327	8.29445	5.33449	14.4251
		1.846		1.55324			0.746507		0.419375			2.98603		2.2056			9.51318		9.9718
		2.067					1.32912					9.0454					23.6288
Two-way ANOVA	Source of Variation	% of total variation	P value	P value summary		Source of Variation	% of total variation	P value	P value summary		Source of Variation	% of total variation	P value	P value summary		Source of Variation	% of total variation	P value	P value summary
	Interaction	5.873	0.0096	**		Interaction	4.492	0.1761	ns		Interaction	0.05353	0.8974	ns		Interaction	0.4738	0.6913	ns
	Genotype	1.415	0.1873	ns		Genotype	3.383	0.2387	ns		Genotype	1.745	0.4634	ns		Genotype	0.9819	0.5681	ns
	Diet	66.18	<0.0001	****		Diet	19.65	0.0069	**		Diet	0.09254	0.8654	ns		Diet	7.176	0.1289	ns
Figure 4E					Figure 4F					Figure 4G					Figure 4H
	Neutrophils					PreNeutrophils					Immature Neutrophils					Mature Neutrophils
	Pnpla2 +/+		Pnpla2 -/-			Pnpla2 +/+		Pnpla2 -/-			Pnpla2 +/+		Pnpla2 -/-			Pnpla2 +/+		Pnpla2 -/-
	Ad libitum	CR	Ad libitum	CR		Ad libitum	CR	Ad libitum	CR		Ad libitum	CR	Ad libitum	CR		Ad libitum	CR	Ad libitum	CR
	1.67987	1.41445	1.20675	1.15902		1.74706	1.51346	1.71358	0.707005		9.22247	7.25611	5.67172	6.86142		6.88745	6.35086	5.87686	4.32316
	1.42432	1.19592	1.89751	0.74652		1.43857	1.54274	2.27701	1.14964		7.62014	6.69716	8.57673	3.68035		6.06762	4.74781	9.71523	3.47878
	1.31875	1.25418	1.93937	0.59202		1.3715	1.26673	1.95876	0.562419		7.05529	6.30855	9.61927	3.635		5.78929	5.80687	9.07625	2.06023
	1.95507	1.6517	2.15962	1.20926		2.24833	1.18923	1.66291	0.773925		8.2895	8.70448	10.3014	6.03419		10.6356	7.25098	10.6685	5.67142
	2.00331	1.14733	1.67552	1.16201		2.40398	1.27354	1.49121	1.12715		10.9181	7.58388	7.60687	6.30972		8.47401	3.40758	8.5284	4.83396
	1.50237	1.42241	1.54581	1.49293		1.27701	1.74956	1.8086	1.35856		8.48838	7.21161	8.14643	6.74803		5.99445	6.47196	6.78612	7.64379
	1.55246	1.54562	2.28893	1.22917		1.64561	1.17467	2.10582	1.24146		8.22805	7.88265	10.9869	4.46189		6.79979	7.04801	11.1242	6.20731
	1.89341	1.65449	1.85608	0.937632		2.06381	1.05887	1.23066	1.744		7.6115	7.75956	6.56029	4.90382		10.7167	8.27245	11.9346	4.02244
		1.41453		1.08882			1.17406		0.718622			6.36541		4.47506			7.25656		6.05385
		0.934076					1.7654					3.92312					4.99731
Two-way ANOVA	Source of Variation	% of total variation	P value	P value summary		Source of Variation	% of total variation	P value	P value summary		Source of Variation	% of total variation	P value	P value summary		Source of Variation	% of total variation	P value	P value summary
	Interaction	8.402	0.0228	*		Interaction	3.455	0.1679	ns		Interaction	5.417	0.0788	ns		Interaction	8.867	0.0304	*
	Genotype	0.8121	0.4618	ns		Genotype	3.188	0.1847	ns		Genotype	5.36	0.0803	ns		Genotype	0.1057	0.806	ns
	Diet	46.23	<0.0001	****		Diet	40.19	<0.0001	****		Diet	38.86	<0.0001	****		Diet	38.55	<0.0001	****
Figure 4I					Figure 4J					Figure 4K					Figure 4L
	CFU-G					CFU-M					CFU-GM					CFU (G+M+GM)
	Pnpla2 +/+		Pnpla2 -/-			Pnpla2 +/+		Pnpla2 -/-			Pnpla2 +/+		Pnpla2 -/-			Pnpla2 +/+		Pnpla2 -/-
	Ad libitum	CR	Ad libitum	CR		Ad libitum	CR	Ad libitum	CR		Ad libitum	CR	Ad libitum	CR		Ad libitum	CR	Ad libitum	CR
	19	24	22	19		49	10	19	13		83	62	63	73		151	96	104	105
	26	29	27	10		41	18	31	12		79	78	72	55		146	125	130	77
	21	27	18	17		49	25	19	18		89	76	79	54		159	128	116	89
	13	14	21	14		39	11	20	14		90	73	80	50		142	98	121	78
	27	17	17	15		32	15	31	12		86	66	75	48		145	98	123	75
	18	14	26	16		46	17	38	10		83	69	80	62		147	100	144	88
Two-way ANOVA	Source of Variation	% of total variation	P value	P value summary		Source of Variation	% of total variation	P value	P value summary		Source of Variation	% of total variation	P value	P value summary		Source of Variation	% of total variation	P value	P value summary
	Interaction	10.72	0.1063	ns		Interaction	6.942	0.0129	*		Interaction	0.5504	0.5337	ns		Interaction	0.0973	0.7472	ns
	Genotype	4.647	0.2786	ns		Genotype	13.99	0.0009	***		Genotype	25.52	0.0003	***		Genotype	21.89	<0.0001	****
	Diet	9.696	0.1234	ns		Diet	60.44	<0.0001	****		Diet	46.49	<0.0001	****		Diet	59.79	<0.0001	****
