# Supplementary material for: Lipolysis of bone marrow adipocytes is required to fuel bone and the marrow niche during energy deficits
Source: eLife. 2022 Jun 22;11:e78496. doi: 10.7554/eLife.78496 (PMC9273217; doi:10.7554/eLife.78496)
Supplement: Figure 5—figure supplement 2—source data 1. [file elife-78496-fig5-figsupp2-data1.xlsx]

## Sheet: Sheet1
Figure 5 - figure supplement 2B
ATGL					Adiponectin					Pparg					C/EBPa					FABP4					SCD1
	Pnpla2 +/+		Pnpla2 -/-			Pnpla2 +/+		Pnpla2 -/-			Pnpla2 +/+		Pnpla2 -/-			Pnpla2 +/+		Pnpla2 -/-			Pnpla2 +/+		Pnpla2 -/-			Pnpla2 +/+		Pnpla2 -/-
	AL	CR	AL	CR		AL	CR	AL	CR		AL	CR	AL	CR		AL	CR	AL	CR		AL	CR	AL	CR		AL	CR	AL	CR
	1.49888	3.52902	0.481392	0.756153		1.59142	2.4453	0.342567	1.17402		1.51047	1.88466	0.78734	1.1084		1.36506	2.10844	0.767767	1.11131		1.39221	4.61083	0.403062	1.69184		1.98382	5.29121	0.221168	1.3492
	0.792677	3.71177	0.596645	0.465827		1.0626	4.4874	0.787572	1.15059		0.753546	2.46034	1.17339	1.4915		0.889456	2.3774	1.15822	1.04086		0.718708	6.41607	1.3528	4.37876		0.624269	6.15821	0.583763	1.83395
	0.946524	5.45718	0.518189	0.757633		0.655357	4.06165	0.410261	1.76192		0.890941	3.50232	0.811187	1.54814		0.952921	2.84988	0.891909	1.58994		0.957017	9.43461	0.639832	3.74018		0.746194	11.6497	0.211135	3.37855
	0.761915	1.84908				0.690628	1.21468				0.845047	1.29093				0.792563	1.13094				0.93207	2.37571				0.645717	2.27769
Two-way ANOVA
	Source of Variation	% of total variation	P value	P value summary		Source of Variation	% of total variation	P value	P value summary		Source of Variation	% of total variation	P value	P value summary		Source of Variation	% of total variation	P value	P value summary		Source of Variation	% of total variation	P value	P value summary		Source of Variation	% of total variation	P value	P value summary
	Interaction	17.38	0.0192	*		Interaction	5.826	0.2342	ns		Interaction	7.63	0.208	ns		Interaction	10.37	0.1273	ns		Interaction	4.723	0.2692	ns		Interaction	7.958	0.1763	ns
	Genotype	32.77	0.0033	**		Genotype	19.05	0.045	*		Genotype	10.7	0.142	ns		Genotype	13.72	0.0848	ns		Genotype	6.577	0.1976	ns		Genotype	15.12	0.0727	ns
	Diet	21.1	0.0118	*		Diet	33.85	0.0122	*		Diet	34	0.0175	*		Diet	32.2	0.015	*		Diet	48.65	0.0038	**		Diet	33.69	0.0135	*
Figure 5 - figure supplement 2C
Fatty acid biosynthesis
	Genotype	Pnpla2 +/+								Pnpla2 -/-
	Diet	AL				CR				AL			CR
	Animal ID	X3593	X3615	X3852	X3848	X3594	X3585	X3673	X3847	X3601	X3807	X3828	X3603	X3604	X3829
	Fasn	-0.100447	-0.664853	-0.616842	-0.524428	2.42039	0.746915	1.9082	-0.0282798	-0.627166	-0.645007	-0.675077	-0.580659	-0.454968	-0.15778
	Pcx	-0.061042	-0.420357	-0.657841	-0.68256	2.01981	1.59605	1.69492	-0.0945898	-0.674615	-0.837057	-0.931521	-0.438897	-0.436248	-0.0760502
	Echdc2	-0.287155	-0.693338	-0.651679	-0.641263	1.0043	2.58737	1.35841	-0.42255	-0.932882	-0.537114	-0.787073	-0.214251	-0.0059514	0.223178
	Echdc3	-0.39446	-0.632495	-1.01335	-0.561085	1.2956	1.3194	2.39056	-0.13262	-1.10857	-0.156424	-0.775317	-0.299245	0.0816123	-0.0136021
	Acacb	-0.24998	-0.747937	-0.745599	-0.654424	1.39351	1.46832	2.25851	0.0328965	-0.839112	-0.602992	-0.750275	-0.546884	-0.371547	0.355516
	Acaca	-0.0545769	-0.711036	-0.691307	-0.635705	1.69359	0.909187	2.40745	-0.134093	-0.763649	-0.739136	-0.815066	-0.444985	-0.243503	0.222834
Figure 5 - figure supplement 2D
Myeloid leukocyte differentiation
	Genotype	Pnpla2 +/+								Pnpla2 -/-
	Diet	AL				CR				AL			CR
	Animal ID	X3593	X3615	X3852	X3848	X3594	X3585	X3673	X3847	X3601	X3807	X3828	X3603	X3604	X3829
	Adipoq	-0.336523	-0.456746	-0.597949	-0.518876	0.303326	3.13625	0.681748	-0.340557	-0.689125	-0.562446	-0.699615	0.403378	-0.314737	-0.0081263
	Cebpa	-0.0956048	-0.759121	-0.400633	-0.45838	1.31776	2.2926	1.67682	-0.136199	-0.799429	-0.452948	-0.774272	-0.715382	-0.457237	-0.237971
	Fasn	-0.100447	-0.664853	-0.616842	-0.524428	2.42039	0.746915	1.9082	-0.0282798	-0.627166	-0.645007	-0.675077	-0.580659	-0.454968	-0.15778
	Fbn1	-0.0557325	-0.704179	-0.587082	-0.547658	0.527987	2.50216	1.88372	-0.480577	-0.907775	-0.402904	-0.664755	-0.235791	-0.162826	-0.164592
	Fgfr3	-0.523314	-0.705754	-0.753764	-0.388885	0.196843	2.63577	1.64676	-0.484906	-0.96501	-0.18244	-0.633738	-0.302466	0.153634	0.307267
	Lif	-0.346239	-0.67825	-0.67825	-0.811054	-0.279837	3.04027	0.184977	0.782596	-0.744652	-0.744652	-0.147033	-0.014229	0.450585	-0.014229
	Pparg	-0.151571	-0.910772	-0.808177	-0.645736	1.24543	1.64212	2.09012	-0.199449	-0.915901	-0.219968	-0.982588	-0.655995	0.19725	0.315234
	Trf	-0.0072769	-0.789152	-0.726144	-0.524708	1.61334	1.6488	1.93234	-0.199302	-0.96713	-0.483521	-0.873436	-0.678138	-0.180345	0.234664
	Prdm16	-0.39432	-0.565056	-0.849617	-0.365864	0.27914	2.77379	1.48378	-0.39432	-0.773734	-0.166671	-0.906529	-0.27101	0.0135505	0.13686
	Lrrc17	-0.350279	-0.706927	-0.760424	-0.528603	0.452179	2.44941	1.8966	-0.261117	-0.867419	-0.136291	-0.778257	-0.510771	0.113363	-0.0114637
	Ocstamp	-0.145907	-0.18788	-0.509674	-0.677566	-0.159898	3.35186	-0.0479693	0.119923	-0.551647	-0.579629	-0.551647	0.00799488	-0.0199872	-0.0479693
	Dcstamp	-0.513651	-0.258647	-0.717654	-0.386149	-0.0036429	3.31141	-0.131145	0.20036	-0.768654	-0.309648	-0.48815	0.0473578	0.17486	-0.156645
	Slc9b2	-0.204131	-0.164439	-0.647361	-0.640746	-0.356285	3.16309	0.424329	0.0340219	-0.753207	-0.726746	-0.746592	0.278791	0.159714	0.17956
	Farp2	-0.0993571	-0.997483	-0.592231	-0.438893	1.19307	1.86119	2.20072	-0.285554	-0.877003	-0.42794	-0.515562	-0.482704	-0.416987	-0.121263
	Oscar	-0.286591	0.0727172	-0.685823	-0.825554	-0.0470523	3.12684	0.0926788	0.591718	-0.785631	-0.605977	-0.725746	-0.0670139	0.292295	-0.14686
	Cdkn1c	-0.710847	-0.504744	-0.431135	-0.710847	0.696546	2.75464	1.10286	0.00462682	-1.04061	0.316727	-0.681404	-0.763845	-0.133757	0.10179
	Thpo	0.0253849	-1.12963	-0.507698	-0.330004	0.913857	1.35809	2.51311	0.203079	-0.77424	-0.685393	-0.863087	-0.685393	-0.152309	0.114232
	Rorc	-0.219221	-0.776005	-0.694525	-0.558724	1.98075	1.15237	1.95359	0.351142	-0.911806	-0.599464	-0.776005	-0.680944	-0.314282	0.0931206
	Il17d	-0.591549	-0.883844	-0.609264	-0.626979	0.781351	2.50855	1.46337	-0.104391	-0.945846	-0.0778188	-0.866129	-0.529547	0.214476	0.267621
	Ankle1	0.0366845	1.74482	0.926896	0.896461	-0.629072	-1.60678	-1.56113	-0.24864	1.33776	-0.180162	0.360052	0.177444	-0.476899	-0.77744
	Rsad2	0.423588	1.93112	0.251039	0.982605	-0.50979	-1.57535	-1.4916	-0.275689	0.943252	-0.0163611	0.872618	-0.501717	0.0229921	-1.0567
Figure 5 - figure supplement 2E
Collagen genes
	Genotype	Pnpla2 +/+								Pnpla2 -/-
	Diet	AL				CR				AL			CR
	Animal ID	X3593	X3615	X3852	X3848	X3594	X3585	X3673	X3847	X3601	X3807	X3828	X3603	X3604	X3829
	Col6a3	-0.0666733	-0.603551	-0.730614	-0.737596	1.08039	2.22047	1.85045	-0.126016	-0.987533	-0.528849	-0.761333	-0.398295	-0.117638	-0.093203
	Col4a1	0.110937	-0.653285	-0.615999	-0.562733	0.984212	2.35734	1.79749	-0.282107	-0.879243	-0.552641	-0.773553	-0.506664	-0.262483	-0.161279
	Col6a1	-0.241309	-0.42907	-0.516997	-0.5834	0.6833	2.85308	1.36931	-0.320993	-0.806424	-0.342517	-0.692851	-0.315497	-0.295347	-0.361293
	Col4a2	0.0378212	-0.592872	-0.581535	-0.595811	0.94439	2.50643	1.62127	-0.297261	-0.977082	-0.505112	-0.744457	-0.494195	-0.199424	-0.122162
	Col6a2	-0.273477	-0.453178	-0.490703	-0.498631	0.731789	2.98967	1.04891	-0.266606	-0.84112	-0.238594	-0.679389	-0.336372	-0.288276	-0.404024
	Col12a1	-0.488502	-0.4641	-0.80573	-0.632346	-0.0890771	3.01642	0.971775	-0.0826555	-0.959849	-0.344658	-0.537306	0.169072	0.283377	-0.0364198
	Col8a2	-0.350845	-0.62027	-0.45447	-0.57882	0.00148036	3.30712	0.219093	-0.350845	-0.66172	-0.361207	-0.45447	-0.0399697	0.229455	0.115468
	Col5a1	-0.355728	-0.286342	-0.635228	-0.537501	0.945025	3.03346	0.769115	-0.248228	-0.72416	-0.512092	-0.516978	-0.376251	-0.25116	-0.303932
	Col15a1	0.279514	-0.834595	-0.70569	-0.74252	1.07136	2.20388	1.58698	-0.0703717	-1.07399	-0.63203	-0.954293	-0.291352	-0.125617	0.288721
	Col1a2	-0.113597	-0.527847	-0.85172	-0.901263	2.23446	2.04252	0.306327	-0.56053	-0.916207	-0.363713	-0.700851	0.301932	-0.120869	0.17136
	Col3a1	-0.369765	-0.373833	-0.755285	-0.623765	0.281505	2.93088	1.17457	-0.348523	-1.01923	-0.294741	-0.604783	0.188401	0.0645653	-0.249997
	Col5a3	0.0490775	-1.01831	-0.362992	-0.382052	0.770652	1.57301	2.51968	-0.108852	-0.911207	-0.46737	-0.850395	-0.688835	-0.0698235	-0.0525784
	Col23a1	0.105598	-0.544238	-0.739189	-1.03162	0.869157	2.78618	0.901649	-0.154336	-0.852911	-0.21932	-0.755435	-0.57673	-0.008123	0.21932
	Col5a2	-0.10687	-0.218884	-0.70161	-0.745616	1.32131	2.71481	0.759903	-0.540257	-1.04565	-0.478916	-0.676274	0.16383	-0.202882	-0.242887
	Col25a1	-0.676686	0.023827	-1.1437	-0.676686	0.857771	1.99194	-0.142962	0.223974	-1.11034	-0.943549	-1.1437	0.791056	1.12463	0.824414
	Col1a1	-0.14236	-0.385887	-0.698913	-0.832791	2.61646	1.84288	-0.219422	-0.4704	-0.720923	-0.375309	-0.592334	0.212865	-0.279991	0.0461154
	Col27a1	-0.287821	-0.588529	-0.708812	-0.145668	0.0894314	2.78487	1.49456	-0.380767	-0.867367	-0.304223	-0.938443	-0.375299	0.193312	0.0347572
	Col26a1	-0.115722	-0.520748	-0.723261	-0.25073	0.0867913	3.2595	0.559322	0.019287	-0.588252	-0.453243	-0.723261	-0.115722	-0.183226	-0.25073
	Col22a1	-0.0716186	-0.254644	-0.612737	-0.891254	2.65785	1.77455	-0.350136	-0.230771	-0.779847	-0.533161	-0.652525	0.111407	-0.198941	0.0318305
	Col8a1	0.173579	-0.800263	-0.809253	0.0147682	-0.707374	2.22914	1.68678	-0.734342	-1.39655	0.419288	-0.353794	-0.506612	0.344377	0.440263
