# Supplementary material for: Lipolysis of bone marrow adipocytes is required to fuel bone and the marrow niche during energy deficits
Source: eLife. 2022 Jun 22;11:e78496. doi: 10.7554/eLife.78496 (PMC9273217; doi:10.7554/eLife.78496)
Supplement: Figure 5—source data 1. [file elife-78496-fig5-data1.xlsx]

## Sheet: Figure 5B
Figure 5B
	WT CR VS WT AL FC>1 OR <-1									KO CR VS WT AL MATCHED
	Row_Num_File1	Ensembl	Gene symbol	baseMean	log2FoldChange	lfcSE	pvalue	padj		Row_Num_File2	Ensembl	Gene symbol	baseMean	log2FoldChange	lfcSE	pvalue	padj
	1	ENSMUSG00000065987.12	Cd209b	23.3698	4.72459	0.965906	4.03842e-10	5.03276e-08		14658	ENSMUSG00000065987.12	Cd209b	23.3698	2.12473	1.32456	0.000661235	0.00510198
	2	ENSMUSG00000020310.9	Madcam1	78.7849	4.59406	0.51862	5.11602e-22	1.04561e-18		2193	ENSMUSG00000020310.9	Madcam1	78.7849	2.79541	0.581719	4.10168e-08	1.31794e-06
	3	ENSMUSG00000035681.7	Kcnc2	60.0652	4.45358	0.431475	2.94927e-28	1.50693e-24		8913	ENSMUSG00000035681.7	Kcnc2	60.0652	3.60411	0.444028	1.13211e-16	1.18345e-14
	4	ENSMUSG00000023078.6	Cxcl13	101.351	4.37672	1.18978	4.25352e-08	2.49808e-06		3624	ENSMUSG00000023078.6	Cxcl13	101.351	2.95424	1.48622	0.000263508	0.00241258
	5	ENSMUSG00000041020.14	Map7d2	83.1843	4.03112	0.463443	1.52057e-21	2.82522e-18		10649	ENSMUSG00000041020.14	Map7d2	83.1843	3.06293	0.494299	3.8913e-11	2.24452e-09
	6	ENSMUSG00000045569.7	Mc2r	47.4286	3.63152	0.453983	7.33357e-19	8.32686e-16		11652	ENSMUSG00000045569.7	Mc2r	47.4286	2.77443	0.49404	6.29481e-10	2.99529e-08
	7	ENSMUSG00000022887.9	Masp1	29.7876	3.45609	0.668235	8.80756e-11	1.35553e-08		3529	ENSMUSG00000022887.9	Masp1	29.7876	0.397167	0.484101	0.0596773	0.166224
	8	ENSMUSG00000012705.16	Retn	417.143	3.44917	0.369216	7.63005e-24	1.94929e-20		1266	ENSMUSG00000012705.16	Retn	417.143	1.87258	0.427313	1.24091e-07	3.47294e-06
	9	ENSMUSG00000029843.4	Slc13a4	34.2322	3.42349	0.571121	9.87756e-13	2.77001e-10		6670	ENSMUSG00000029843.4	Slc13a4	34.2322	1.9532	0.726312	3.98789e-05	0.000503522
	10	ENSMUSG00000060985.15	Tdrd5	10.3347	3.37393	1.0932	4.09984e-07	1.60215e-05		14081	ENSMUSG00000060985.15	Tdrd5	10.3347	3.32325	1.13568	3.58882e-05	0.000459762
	11	ENSMUSG00000025127.15	Gcgr	7.04107	3.3201	1.5354	4.22621e-06	0.0001069		4313	ENSMUSG00000025127.15	Gcgr	7.04107	1.87901	1.63145	0.00220349	0.0135071
	12	ENSMUSG00000041559.7	Fmod	55.8892	3.24737	0.387668	4.64723e-20	5.93625e-17		10780	ENSMUSG00000041559.7	Fmod	55.8892	2.37808	0.432911	6.29122e-10	2.99529e-08
	13	ENSMUSG00000039518.7	Cdsn	66.7662	2.96923	0.484241	5.31672e-13	1.62184e-10		10161	ENSMUSG00000039518.7	Cdsn	66.7662	1.22917	0.608682	0.000384659	0.00326167
	14	ENSMUSG00000033022.8	Cdo1	1205.85	2.9594	0.409331	3.60461e-16	2.4557e-13		8137	ENSMUSG00000033022.8	Cdo1	1205.85	1.2845	0.508133	8.76e-05	0.000983224
	15	ENSMUSG00000046160.6	Olig1	18.1943	2.9569	0.571658	1.17781e-10	1.74435e-08		11760	ENSMUSG00000046160.6	Olig1	18.1943	1.42101	0.734766	0.000383958	0.0032569
	16	ENSMUSG00000040966.10	Slc22a2	12.0997	2.94573	0.826797	1.34822e-07	6.37846e-06		10640	ENSMUSG00000040966.10	Slc22a2	12.0997	2.46889	0.991914	7.48231e-05	0.000862746
	17	ENSMUSG00000020848.7	Doc2b	43.2514	2.93246	0.744459	3.33883e-08	2.04308e-06		2495	ENSMUSG00000020848.7	Doc2b	43.2514	1.82596	0.957113	0.000323425	0.00284995
	18	ENSMUSG00000027849.19	Syt6	101.675	2.92442	0.390943	5.71755e-17	4.67421e-14		5621	ENSMUSG00000027849.19	Syt6	101.675	2.59814	0.425358	2.42045e-11	1.44184e-09
	19	ENSMUSG00000058740.14	Kcnt1	68.915	2.87436	0.445832	7.47454e-14	3.11764e-11		13789	ENSMUSG00000058740.14	Kcnt1	68.915	2.85378	0.472639	6.46386e-11	3.57158e-09
	20	ENSMUSG00000026834.13	Acvr1c	274.68	2.85816	0.457999	2.77693e-13	9.45915e-11		5142	ENSMUSG00000026834.13	Acvr1c	274.68	1.96754	0.537762	1.99568e-06	3.95275e-05
	21	ENSMUSG00000059201.12	Lep	276.795	2.85342	0.488494	3.11096e-12	6.98702e-10		13844	ENSMUSG00000059201.12	Lep	276.795	2.32713	0.553901	3.0688e-07	7.70425e-06
	22	ENSMUSG00000022510.14	Trp63	26.6307	2.82164	0.691872	2.15435e-08	1.42957e-06		3326	ENSMUSG00000022510.14	Trp63	26.6307	0.597044	0.600593	0.018697	0.0707584
	23	ENSMUSG00000024990.13	Rbp4	445.53	2.80799	0.460094	6.56e-13	1.94309e-10		4262	ENSMUSG00000024990.13	Rbp4	445.53	2.07201	0.532183	8.77313e-07	1.91222e-05
	24	ENSMUSG00000009394.13	Syn2	34.6295	2.79737	0.416737	1.30244e-14	6.33791e-12		1121	ENSMUSG00000009394.13	Syn2	34.6295	2.303	0.46081	8.0753e-09	3.0372e-07
	25	ENSMUSG00000029195.10	Klb	77.7518	2.78588	0.657405	1.14434e-08	8.47394e-07		6345	ENSMUSG00000029195.10	Klb	77.7518	1.00666	0.744618	0.00291491	0.0168307
	26	ENSMUSG00000071540.4	3425401B19Rik	46.8346	2.77072	0.658935	1.34109e-08	9.58365e-07		15272	ENSMUSG00000071540.4	3425401B19Rik	46.8346	1.25612	0.806732	0.00119583	0.00829576
	27	ENSMUSG00000039865.8	Slc44a3	41.8202	2.70308	0.447015	9.5146e-13	2.73886e-10		10276	ENSMUSG00000039865.8	Slc44a3	41.8202	1.44355	0.556451	6.30204e-05	0.000746304
	28	ENSMUSG00000062609.14	Kcnj15	555.289	2.69708	0.657931	2.29976e-08	1.50649e-06		14291	ENSMUSG00000062609.14	Kcnj15	555.289	1.13397	0.777086	0.00180736	0.0115551
	29	ENSMUSG00000111840.1	Gm48832	49.8501	2.69702	0.472903	7.40706e-12	1.54475e-09		22110	ENSMUSG00000111840.1	Gm48832	49.8501	2.3466	0.525975	1.04544e-07	3.00044e-06
	30	ENSMUSG00000030972.6	Acsm5	57.2379	2.67627	0.677718	4.40391e-08	2.5643e-06		7169	ENSMUSG00000030972.6	Acsm5	57.2379	1.81464	0.865471	0.000199083	0.00191309
	31	ENSMUSG00000056596.8	Trnp1	185.222	2.66828	0.33733	1.8892e-18	2.03218e-15		13501	ENSMUSG00000056596.8	Trnp1	185.222	2.31653	0.369631	5.6139e-12	3.63735e-10
	32	ENSMUSG00000030317.8	Timp4	554.849	2.65816	0.413113	8.30416e-14	3.39441e-11		6868	ENSMUSG00000030317.8	Timp4	554.849	2.09137	0.465586	7.7959e-08	2.32198e-06
	33	ENSMUSG00000040340.13	Tex45	22.778	2.65369	0.582769	3.20921e-09	2.98395e-07		10424	ENSMUSG00000040340.13	Tex45	22.778	1.73857	0.734044	9.95987e-05	0.001093
	34	ENSMUSG00000054200.7	Ffar4	46.741	2.63158	0.537637	6.24257e-10	7.46115e-08		13146	ENSMUSG00000054200.7	Ffar4	46.741	1.46051	0.677221	0.000206896	0.00197374
	35	ENSMUSG00000031298.15	Adgrg2	221.057	2.60179	0.411656	1.7717e-13	6.505e-11		7299	ENSMUSG00000031298.15	Adgrg2	221.057	2.29172	0.455162	6.62524e-09	2.54351e-07
	36	ENSMUSG00000027792.11	Bche	148.469	2.58908	0.398244	5.46146e-14	2.37492e-11		5592	ENSMUSG00000027792.11	Bche	148.469	1.91981	0.452103	2.16949e-07	5.68176e-06
	37	ENSMUSG00000031351.15	Zfp185	29.3168	2.56544	0.634868	3.55105e-08	2.14089e-06		7319	ENSMUSG00000031351.15	Zfp185	29.3168	1.3726	0.795157	0.000684904	0.00524864
	38	ENSMUSG00000020427.11	Igfbp3	634.225	2.56518	0.431928	1.97239e-12	4.85682e-10		2256	ENSMUSG00000020427.11	Igfbp3	634.225	2.51623	0.47057	1.70531e-09	7.4683e-08
	39	ENSMUSG00000087132.8	A930001C03Rik	6.79337	2.56493	0.818987	9.97757e-07	3.3158e-05		17805	ENSMUSG00000087132.8	A930001C03Rik	6.79337	-0.179026	0.513705	0.277404	0.476249
	40	ENSMUSG00000028347.14	Tmeff1	36.6733	2.55034	0.422066	1.05479e-12	2.8441e-10		5867	ENSMUSG00000028347.14	Tmeff1	36.6733	1.87038	0.486392	1.02212e-06	2.19149e-05
	41	ENSMUSG00000098708.7	Gm27252	90.1103	2.53781	0.299223	1.59386e-20	2.3268e-17		19553	ENSMUSG00000098708.7	Gm27252	90.1103	2.46456	0.320971	3.09916e-16	3.1056e-14
	42	ENSMUSG00000085211.2	B430219N15Rik	18.2521	2.51193	0.497075	3.16714e-10	4.12293e-08		17231	ENSMUSG00000085211.2	B430219N15Rik	18.2521	0.514554	0.449498	0.022802	0.0820643
	43	ENSMUSG00000024526.9	Cidea	13.5714	2.47535	0.869611	2.72635e-06	7.61219e-05		4025	ENSMUSG00000024526.9	Cidea	13.5714	0.199497	0.425235	0.249511	0.443867
	44	ENSMUSG00000048355.2	Arxes1	28.6692	2.45164	0.588935	2.552e-08	1.6455e-06		12187	ENSMUSG00000048355.2	Arxes1	28.6692	1.78373	0.739044	8.69438e-05	0.000978179
	45	ENSMUSG00000019326.14	Aoc3	2697.12	2.42008	0.404581	1.75037e-12	4.41656e-10		1872	ENSMUSG00000019326.14	Aoc3	2697.12	1.59206	0.478182	6.28135e-06	0.000105362
	46	ENSMUSG00000007107.6	Atp1a4	5.2274	2.41122	1.5338	3.68418e-05	0.000598072		994	ENSMUSG00000007107.6	Atp1a4	5.2274	0.350931	0.727606	0.0924156	0.226762
	47	ENSMUSG00000020303.2	Stc2	68.6689	2.40482	0.559285	1.51466e-08	1.05654e-06		2189	ENSMUSG00000020303.2	Stc2	68.6689	2.07084	0.670345	1.27585e-05	0.000193042
	48	ENSMUSG00000015957.12	Wnt11	15.2781	2.40214	0.564363	1.85161e-08	1.24395e-06		1511	ENSMUSG00000015957.12	Wnt11	15.2781	1.03188	0.669202	0.00179278	0.0114898
	49	ENSMUSG00000033849.3	B3galt2	224.43	2.32061	0.443318	1.6391e-10	2.31083e-08		8358	ENSMUSG00000033849.3	B3galt2	224.43	0.969192	0.52087	0.000944766	0.00683683
	50	ENSMUSG00000025528.10	2010106E10Rik	33.6315	2.31716	0.435459	1.0219e-10	1.5357e-08		4524	ENSMUSG00000025528.10	2010106E10Rik	33.6315	2.05697	0.489708	2.65047e-07	6.791e-06
	51	ENSMUSG00000022490.7	Ppp1r1a	226.092	2.29713	0.490651	3.10418e-09	2.91024e-07		3315	ENSMUSG00000022490.7	Ppp1r1a	226.092	0.274416	0.336623	0.141404	0.305366
	52	ENSMUSG00000036913.15	Trim67	17.2359	2.26331	0.609025	2.40622e-07	1.03971e-05		9253	ENSMUSG00000036913.15	Trim67	17.2359	1.28469	0.759865	0.000828276	0.00614041
	53	ENSMUSG00000086679.2	Gm15551	15.3849	2.22544	0.8197	6.57046e-06	0.000151737		17665	ENSMUSG00000086679.2	Gm15551	15.3849	1.51032	1.0259	0.0011551	0.008051
	54	ENSMUSG00000030606.8	Hapln3	13.0997	2.19804	0.63141	6.77734e-07	2.44295e-05		6993	ENSMUSG00000030606.8	Hapln3	13.0997	1.50967	0.807271	0.000419275	0.00351861
	55	ENSMUSG00000030495.12	Slc7a10	342.725	2.17904	0.422583	3.59154e-10	4.58774e-08		6938	ENSMUSG00000030495.12	Slc7a10	342.725	0.701518	0.444099	0.00442037	0.0233655
	56	ENSMUSG00000042041.7	2010003K11Rik	6.9308	2.1742	0.762258	5.166e-06	0.000124361		10913	ENSMUSG00000042041.7	2010003K11Rik	6.9308	0.0890853	0.374093	0.577329	0.749478
	57	ENSMUSG00000024481.5	Lvrn	11.1853	2.16622	0.63204	8.90055e-07	3.01674e-05		4008	ENSMUSG00000024481.5	Lvrn	11.1853	1.78606	0.804114	0.000144991	0.00147105
	58	ENSMUSG00000031891.6	Hsd11b2	45.5001	2.16061	0.512716	4.00718e-08	2.37972e-06		7616	ENSMUSG00000031891.6	Hsd11b2	45.5001	1.1939	0.635763	0.000585668	0.00465093
	59	ENSMUSG00000055737.12	Ghr	2990.82	2.15879	0.352322	1.23726e-12	3.24194e-10		13374	ENSMUSG00000055737.12	Ghr	2990.82	1.56011	0.407932	1.14892e-06	2.4303e-05
	60	ENSMUSG00000005268.20	Prlr	132.197	2.15866	0.357865	2.26235e-12	5.3765e-10		753	ENSMUSG00000005268.20	Prlr	132.197	1.49848	0.42026	2.90673e-06	5.47371e-05
	61	ENSMUSG00000035686.8	Thrsp	1210.89	2.14573	0.354853	2.14946e-12	5.22984e-10		8915	ENSMUSG00000035686.8	Thrsp	1210.89	0.800909	0.400762	0.00109343	0.00770733
	62	ENSMUSG00000011118.4	Panx3	34.6046	2.13842	0.457813	5.04026e-09	4.44021e-07		1220	ENSMUSG00000011118.4	Panx3	34.6046	1.01031	0.551639	0.000925797	0.00672012
	63	ENSMUSG00000097286.2	Gm26684	33.5539	2.13051	0.503113	4.00246e-08	2.37972e-06		19206	ENSMUSG00000097286.2	Gm26684	33.5539	1.50319	0.634579	0.00011306	0.00120603
	64	ENSMUSG00000030087.11	Klf15	243.267	2.12751	0.290379	3.29064e-16	2.31911e-13		6743	ENSMUSG00000030087.11	Klf15	243.267	1.16787	0.345658	5.93568e-06	0.000100698
	65	ENSMUSG00000032418.15	Me1	562.199	2.12517	0.4182	6.36603e-10	7.56448e-08		7903	ENSMUSG00000032418.15	Me1	562.199	0.569919	0.401025	0.0112595	0.0483698
	66	ENSMUSG00000040703.11	Cyp2s1	81.8164	2.11413	0.332756	3.32381e-13	1.09568e-10		10552	ENSMUSG00000040703.11	Cyp2s1	81.8164	1.83522	0.369872	9.0691e-09	3.35642e-07
	67	ENSMUSG00000020264.5	Slc36a2	781.948	2.1133	0.366889	1.40263e-11	2.70442e-09		2168	ENSMUSG00000020264.5	Slc36a2	781.948	0.975812	0.437713	0.000339915	0.00295974
	68	ENSMUSG00000029335.5	Bmp3	98.4611	2.10325	0.50167	5.25284e-08	2.92527e-06		6407	ENSMUSG00000029335.5	Bmp3	98.4611	1.44907	0.634535	0.00014867	0.00150254
	69	ENSMUSG00000057054.11	Inca1	51.4059	2.09902	0.453674	7.11747e-09	5.81868e-07		13562	ENSMUSG00000057054.11	Inca1	51.4059	1.43886	0.565703	7.30542e-05	0.000845235
	70	ENSMUSG00000048040.8	Arxes2	72.0613	2.07389	0.431742	3.2289e-09	2.98608e-07		12132	ENSMUSG00000048040.8	Arxes2	72.0613	1.80666	0.509945	2.96894e-06	5.57684e-05
	71	ENSMUSG00000030935.15	Acsm3	30.5212	2.05964	0.398988	5.20728e-10	6.37283e-08		7160	ENSMUSG00000030935.15	Acsm3	30.5212	0.87923	0.470827	0.001183	0.00821879
	72	ENSMUSG00000031808.7	Slc27a1	1846.09	2.0445	0.282439	8.82221e-16	5.30319e-13		7565	ENSMUSG00000031808.7	Slc27a1	1846.09	1.08823	0.336948	1.07421e-05	0.000166148
	73	ENSMUSG00000044461.6	Shisa2	297.648	2.04378	0.399543	7.12171e-10	8.36515e-08		11444	ENSMUSG00000044461.6	Shisa2	297.648	0.947959	0.475042	0.000698581	0.00533443
	74	ENSMUSG00000031700.11	Gpt2	205.001	2.03356	0.256285	4.14588e-18	3.68407e-15		7503	ENSMUSG00000031700.11	Gpt2	205.001	0.703291	0.285874	0.000474366	0.00391427
	75	ENSMUSG00000038576.15	Susd4	121.381	2.03304	0.355121	2.35289e-11	4.2936e-09		9849	ENSMUSG00000038576.15	Susd4	121.381	1.31786	0.430547	1.65886e-05	0.000240529
	76	ENSMUSG00000029778.12	Adcyap1r1	1539.84	2.02514	0.354779	2.68589e-11	4.81528e-09		6642	ENSMUSG00000029778.12	Adcyap1r1	1539.84	1.08062	0.43147	0.000121783	0.00127775
	77	ENSMUSG00000058297.16	Spock2	241.344	2.01936	0.278749	9.46702e-16	5.5282e-13		13728	ENSMUSG00000058297.16	Spock2	241.344	1.40079	0.319585	1.22173e-07	3.43553e-06
	78	ENSMUSG00000066687.5	Zbtb16	638.659	2.01214	0.275255	5.99197e-16	3.95045e-13		14735	ENSMUSG00000066687.5	Zbtb16	638.659	1.32183	0.318945	3.15156e-07	7.87858e-06
	79	ENSMUSG00000007097.14	Atp1a2	1123.22	2.01127	0.555382	7.05632e-07	2.52569e-05		993	ENSMUSG00000007097.14	Atp1a2	1123.22	0.507131	0.473452	0.0259038	0.0905216
	80	ENSMUSG00000020108.4	Ddit4	1120.18	2.00861	0.250022	2.07988e-18	2.12543e-15		2083	ENSMUSG00000020108.4	Ddit4	1120.18	1.48327	0.278677	1.56772e-09	6.91696e-08
	81	ENSMUSG00000105565.1	Gm43566	9.59274	2.00641	0.63965	3.59526e-06	9.55526e-05		20726	ENSMUSG00000105565.1	Gm43566	9.59274	1.19883	0.789875	0.00142301	0.00958222
	82	ENSMUSG00000028631.7	Kcnq4	83.6853	2.0031	0.479573	7.92289e-08	4.20592e-06		6023	ENSMUSG00000028631.7	Kcnq4	83.6853	0.93906	0.564558	0.0016631	0.0108468
	83	ENSMUSG00000029055.17	Plch2	7.80155	1.9988	0.786216	1.76261e-05	0.00033202		6262	ENSMUSG00000029055.17	Plch2	7.80155	1.93931	1.00948	0.000304393	0.00271547
	84	ENSMUSG00000034295.10	Fhod3	41.3634	1.9973	0.453781	2.97753e-08	1.85533e-06		8497	ENSMUSG00000034295.10	Fhod3	41.3634	1.09759	0.561618	0.000564248	0.00451723
	85	ENSMUSG00000049303.10	Syt12	56.6373	1.99523	0.438288	1.48495e-08	1.03936e-06		12345	ENSMUSG00000049303.10	Syt12	56.6373	0.24982	0.314756	0.172416	0.349932
	86	ENSMUSG00000052392.5	Acot4	35.378	1.99186	0.550115	7.53989e-07	2.66149e-05		12868	ENSMUSG00000052392.5	Acot4	35.378	1.15736	0.683488	0.000988185	0.00709459
	87	ENSMUSG00000007655.16	Cav1	1367.44	1.98944	0.409363	3.35506e-09	3.06119e-07		1015	ENSMUSG00000007655.16	Cav1	1367.44	1.43821	0.505002	3.00837e-05	0.000396793
	88	ENSMUSG00000048489.12	Depp1	715.234	1.98193	0.336252	1.0568e-11	2.11754e-09		12214	ENSMUSG00000048489.12	Depp1	715.234	1.62901	0.386534	2.57458e-07	6.60372e-06
	89	ENSMUSG00000037709.13	Fam13a	345.619	1.97474	0.310671	5.83857e-13	1.75483e-10		9516	ENSMUSG00000037709.13	Fam13a	345.619	1.43193	0.362094	7.01478e-07	1.57511e-05
	90	ENSMUSG00000027559.5	Car3	25164.8	1.96847	0.57191	1.52517e-06	4.73729e-05		5489	ENSMUSG00000027559.5	Car3	25164.8	0.752118	0.594455	0.00680274	0.0328255
	91	ENSMUSG00000019577.6	Pdk4	153.988	1.96773	0.438568	2.25411e-08	1.48133e-06		1897	ENSMUSG00000019577.6	Pdk4	153.988	1.66737	0.53737	1.25417e-05	0.000190371
	92	ENSMUSG00000005373.13	Mlxipl	200.746	1.96477	0.433654	1.85637e-08	1.24395e-06		766	ENSMUSG00000005373.13	Mlxipl	200.746	0.813372	0.490146	0.002424	0.0145828
	93	ENSMUSG00000049112.9	Oxtr	15.7328	1.96176	0.771276	1.9452e-05	0.000361419		12319	ENSMUSG00000049112.9	Oxtr	15.7328	0.261747	0.438982	0.15705	0.328766
	94	ENSMUSG00000045776.3	Lrtm1	4.45973	1.96	1.35189	0.000101289	0.0013028		11693	ENSMUSG00000045776.3	Lrtm1	4.45973	1.51127	1.50502	0.00385129	0.020986
	95	ENSMUSG00000020052.9	Ascl1	12.9058	1.95769	0.847713	3.22444e-05	0.000536654		2048	ENSMUSG00000020052.9	Ascl1	12.9058	0.507178	0.636801	0.034389	0.111881
	96	ENSMUSG00000031373.4	Car5b	290.552	1.95376	0.361185	2.06896e-10	2.81903e-08		7331	ENSMUSG00000031373.4	Car5b	290.552	1.34666	0.440224	1.64455e-05	0.000238748
	97	ENSMUSG00000021260.8	Hhipl1	41.7712	1.94684	0.45909	7.43418e-08	3.9963e-06		2703	ENSMUSG00000021260.8	Hhipl1	41.7712	1.43302	0.581838	9.20631e-05	0.00102505
	98	ENSMUSG00000037071.3	Scd1	121924	1.94671	0.5665	1.67025e-06	5.11347e-05		9309	ENSMUSG00000037071.3	Scd1	121924	0.747996	0.589336	0.00684681	0.0329911
	99	ENSMUSG00000044405.4	Adig	158.018	1.94597	0.663011	7.68441e-06	0.000172837		11434	ENSMUSG00000044405.4	Adig	158.018	0.617762	0.598993	0.0163449	0.0641703
	100	ENSMUSG00000025213.11	Kazald1	152.854	1.94368	0.317069	2.91599e-12	6.6219e-10		4373	ENSMUSG00000025213.11	Kazald1	152.854	0.850478	0.373027	0.000418504	0.00351338
	101	ENSMUSG00000040740.7	Slc25a34	15.4264	1.94311	0.461424	8.57648e-08	4.50607e-06		10574	ENSMUSG00000040740.7	Slc25a34	15.4264	0.847242	0.537437	0.0026312	0.0155175
	102	ENSMUSG00000039956.9	Mrap	621.637	1.93081	0.300229	4.4276e-13	1.3981e-10		10299	ENSMUSG00000039956.9	Mrap	621.637	0.829828	0.349759	0.000342644	0.00297802
	103	ENSMUSG00000021750.16	Fam107a	61.8118	1.9293	0.386774	2.24907e-09	2.28274e-07		2938	ENSMUSG00000021750.16	Fam107a	61.8118	2.27612	0.430405	1.74288e-09	7.60467e-08
	104	ENSMUSG00000056771.7	Gm10010	5.12031	1.92252	0.922868	5.34016e-05	0.000796078		13532	ENSMUSG00000056771.7	Gm10010	5.12031	0.472491	0.655078	0.0430746	0.131458
	105	ENSMUSG00000048647.9	Exd1	51.7658	1.92054	0.412861	1.25574e-08	9.13339e-07		12242	ENSMUSG00000048647.9	Exd1	51.7658	1.40056	0.516165	4.60277e-05	0.0005699
	106	ENSMUSG00000004328.15	Hif3a	238.34	1.91993	0.322341	9.71244e-12	1.96538e-09		638	ENSMUSG00000004328.15	Hif3a	238.34	1.75384	0.364537	1.91468e-08	6.58144e-07
	107	ENSMUSG00000026989.5	Dapl1	17.782	1.91604	0.492287	3.5478e-07	1.43869e-05		5225	ENSMUSG00000026989.5	Dapl1	17.782	1.36651	0.631251	0.000221243	0.00208952
	108	ENSMUSG00000047992.11	Dipk1c	47.4053	1.90751	0.343781	1.16636e-10	1.74001e-08		12119	ENSMUSG00000047992.11	Dipk1c	47.4053	1.10829	0.42619	8.68651e-05	0.00097776
	109	ENSMUSG00000103368.1	Gm36927	6.68977	1.9061	1.06504	8.51986e-05	0.00113439		20217	ENSMUSG00000103368.1	Gm36927	6.68977	1.16205	1.1617	0.00518367	0.0265458
	110	ENSMUSG00000032033.11	Barx2	15.8957	1.90346	0.578898	3.12543e-06	8.55121e-05		7701	ENSMUSG00000032033.11	Barx2	15.8957	1.49614	0.751882	0.000311059	0.00276238
	111	ENSMUSG00000056973.6	Ces1d	329.96	1.89778	0.342279	1.25278e-10	1.82887e-08		13557	ENSMUSG00000056973.6	Ces1d	329.96	0.712238	0.377902	0.00211116	0.0130526
	112	ENSMUSG00000028150.14	Rorc	73.0448	1.89124	0.403279	1.19081e-08	8.7546e-07		5777	ENSMUSG00000028150.14	Rorc	73.0448	0.284933	0.308986	0.124769	0.27979
	113	ENSMUSG00000015568.16	Lpl	13165	1.88684	0.309425	4.76868e-12	1.03683e-09		1456	ENSMUSG00000015568.16	Lpl	13165	0.888944	0.367337	0.000243176	0.00226323
	114	ENSMUSG00000098322.1	5830468F06Rik	10.4746	1.88201	0.665445	1.23816e-05	0.000248966		19521	ENSMUSG00000098322.1	5830468F06Rik	10.4746	1.1853	0.818462	0.00171556	0.0111033
	115	ENSMUSG00000036136.9	Fam110c	98.3007	1.87538	0.2559	1.06558e-15	6.04954e-13		9032	ENSMUSG00000036136.9	Fam110c	98.3007	0.926121	0.308142	3.16602e-05	0.000412752
	116	ENSMUSG00000042429.8	Adora1	150.055	1.87377	0.446573	1.2141e-07	5.93629e-06		11024	ENSMUSG00000042429.8	Adora1	150.055	0.187047	0.302209	0.291553	0.491662
	117	ENSMUSG00000061603.8	Akap6	40.1002	1.87023	0.479883	4.153e-07	1.61983e-05		14158	ENSMUSG00000061603.8	Akap6	40.1002	1.2066	0.610102	0.00044342	0.00367945
	118	ENSMUSG00000043122.7	A530016L24Rik	513.676	1.86254	0.597147	5.96577e-06	0.000140309		11198	ENSMUSG00000043122.7	A530016L24Rik	513.676	0.511593	0.504833	0.0269936	0.0934386
	119	ENSMUSG00000050052.12	Tdrp	92.0488	1.86133	0.303419	4.33718e-12	9.53154e-10		12483	ENSMUSG00000050052.12	Tdrp	92.0488	1.27623	0.36566	3.87023e-06	6.99214e-05
	120	ENSMUSG00000116775.1	Gm49769	5.61132	1.85703	0.777224	3.64206e-05	0.000592175		23049	ENSMUSG00000116775.1	Gm49769	5.61132	0.552559	0.641849	0.0264642	0.0919559
	121	ENSMUSG00000023019.12	Gpd1	3987.2	1.85623	0.3784	4.82212e-09	4.28498e-07		3593	ENSMUSG00000023019.12	Gpd1	3987.2	0.207745	0.277892	0.241809	0.434736
	122	ENSMUSG00000062515.3	Fabp4	10164.2	1.84952	0.284721	4.44643e-13	1.3981e-10		14277	ENSMUSG00000062515.3	Fabp4	10164.2	0.861591	0.336194	0.00017038	0.00168099
	123	ENSMUSG00000025153.9	Fasn	8157.19	1.84754	0.505079	1.10575e-06	3.62169e-05		4332	ENSMUSG00000025153.9	Fasn	8157.19	0.101673	0.304066	0.551986	0.730862
	124	ENSMUSG00000060402.8	Chst8	14.1398	1.83435	0.597173	7.50326e-06	0.000170013		14013	ENSMUSG00000060402.8	Chst8	14.1398	0.378838	0.444404	0.06583	0.178821
	125	ENSMUSG00000019817.18	Plagl1	1023.32	1.83236	0.372072	4.91182e-09	4.34579e-07		1940	ENSMUSG00000019817.18	Plagl1	1023.32	1.62957	0.445991	2.09139e-06	4.12161e-05
	126	ENSMUSG00000047205.12	Dusp18	85.3389	1.82724	0.290086	1.83262e-12	4.56768e-10		11961	ENSMUSG00000047205.12	Dusp18	85.3389	1.20195	0.351951	5.14094e-06	8.93957e-05
	127	ENSMUSG00000002688.8	Prkd1	91.5727	1.81771	0.377935	9.36751e-09	7.30738e-07		421	ENSMUSG00000002688.8	Prkd1	91.5727	0.753554	0.427729	0.00237385	0.0143212
	128	ENSMUSG00000034842.16	Art3	295.44	1.8174	0.398767	3.1258e-08	1.9418e-06		8667	ENSMUSG00000034842.16	Art3	295.44	0.793627	0.456246	0.00215077	0.0132319
	129	ENSMUSG00000025509.15	Pnpla2	7373.12	1.81293	0.234014	6.1889e-17	4.86495e-14		4518	ENSMUSG00000025509.15	Pnpla2	7373.12	0.0275555	0.198954	0.861365	0.927066
	130	ENSMUSG00000039092.9	Sptlc3	26.091	1.81274	0.585478	7.53428e-06	0.000170338		10024	ENSMUSG00000039092.9	Sptlc3	26.091	1.39752	0.762678	0.000509904	0.00415388
	131	ENSMUSG00000072624.3	Gm5460	3.11903	1.80997	1.40304	0.000151724	0.00175194		15362	ENSMUSG00000072624.3	Gm5460	3.11903	1.83012	1.70069	0.00271135	0.0158557
	132	ENSMUSG00000073530.11	Pappa2	34.4892	1.79626	0.555283	5.33128e-06	0.000127888		15498	ENSMUSG00000073530.11	Pappa2	34.4892	1.65996	0.727068	0.000129423	0.00134065
	133	ENSMUSG00000051279.2	Gdf6	43.9808	1.79499	0.30428	2.67058e-11	4.81528e-09		12689	ENSMUSG00000051279.2	Gdf6	43.9808	0.864458	0.368451	0.000328404	0.00287965
	134	ENSMUSG00000071847.13	Apcdd1	652.183	1.78735	0.257553	3.02384e-14	1.37336e-11		15320	ENSMUSG00000071847.13	Apcdd1	652.183	0.841184	0.303651	9.34285e-05	0.00103489
	135	ENSMUSG00000035948.13	Acss3	214.609	1.78652	0.303081	2.87879e-11	5.02878e-09		8980	ENSMUSG00000035948.13	Acss3	214.609	0.494075	0.296301	0.0116788	0.0497901
	136	ENSMUSG00000028782.14	Adgrb2	51.512	1.78444	0.405589	7.44981e-08	3.9963e-06		6107	ENSMUSG00000028782.14	Adgrb2	51.512	1.13828	0.513799	0.000258685	0.00237589
	137	ENSMUSG00000040181.14	Fmo1	1828.58	1.78174	0.267698	2.23987e-13	7.89285e-11		10369	ENSMUSG00000040181.14	Fmo1	1828.58	1.2773	0.316456	4.77462e-07	1.13597e-05
	138	ENSMUSG00000038167.6	Plekhg6	52.0588	1.77399	0.414748	1.32998e-07	6.32142e-06		9679	ENSMUSG00000038167.6	Plekhg6	52.0588	1.09158	0.523157	0.000400203	0.00337773
	139	ENSMUSG00000020963.15	Tshr	404.416	1.7731	0.337194	1.16766e-09	1.29699e-07		2564	ENSMUSG00000020963.15	Tshr	404.416	0.842525	0.39942	0.000698213	0.00533443
	140	ENSMUSG00000060002.14	Chpt1	882.117	1.76208	0.247268	9.25142e-15	4.72701e-12		13962	ENSMUSG00000060002.14	Chpt1	882.117	0.770982	0.285539	0.000159108	0.00158766
	141	ENSMUSG00000052387.16	Trpm3	97.0897	1.76041	0.359546	8.1224e-09	6.56149e-07		12867	ENSMUSG00000052387.16	Trpm3	97.0897	1.12842	0.45201	0.000116012	0.0012303
	142	ENSMUSG00000029321.1	Slc10a6	48.4842	1.75835	0.456396	7.7722e-07	2.71201e-05		6401	ENSMUSG00000029321.1	Slc10a6	48.4842	1.97127	0.553236	2.77206e-06	5.25714e-05
	143	ENSMUSG00000031898.9	Dpep3	19.8129	1.75536	0.517517	3.82676e-06	9.96263e-05		7620	ENSMUSG00000031898.9	Dpep3	19.8129	0.488996	0.456535	0.0285781	0.097623
	144	ENSMUSG00000030237.14	Slco1a4	12.3413	1.75346	0.664422	2.92916e-05	0.000495991		6826	ENSMUSG00000030237.14	Slco1a4	12.3413	1.99069	0.859011	0.000108527	0.00116936
	145	ENSMUSG00000089941.1	Gm16168	4.62232	1.75114	1.03013	0.000143057	0.00167841		18170	ENSMUSG00000089941.1	Gm16168	4.62232	0.719983	0.904836	0.0170594	0.0662351
	146	ENSMUSG00000005958.15	Ephb3	76.251	1.75096	0.395487	7.71005e-08	4.11431e-06		850	ENSMUSG00000005958.15	Ephb3	76.251	0.968892	0.487526	0.000677859	0.00521323
	147	ENSMUSG00000030711.16	Sult1a1	971.193	1.73199	0.254074	9.9674e-14	3.99439e-11		7046	ENSMUSG00000030711.16	Sult1a1	971.193	1.13064	0.305313	1.7452e-06	3.53026e-05
	148	ENSMUSG00000063558.4	Aox1	277.595	1.72886	0.357315	1.26754e-08	9.15407e-07		14421	ENSMUSG00000063558.4	Aox1	277.595	0.763414	0.410204	0.00179569	0.0115022
	149	ENSMUSG00000017969.13	Ptgis	117.785	1.72623	0.345836	6.00775e-09	5.18086e-07		1681	ENSMUSG00000017969.13	Ptgis	117.785	0.792112	0.404421	0.00125432	0.00863008
	150	ENSMUSG00000049122.17	Frmd3	16.3553	1.72247	0.50206	3.83628e-06	9.96263e-05		12322	ENSMUSG00000049122.17	Frmd3	16.3553	0.978527	0.611899	0.00176038	0.0113313
	151	ENSMUSG00000067786.16	Nnat	118.695	1.71878	1.3583	0.000191782	0.00209402		14835	ENSMUSG00000067786.16	Nnat	118.695	0.840013	1.20649	0.0164328	0.0644228
	152	ENSMUSG00000055799.13	Tcf7l1	923.728	1.71631	0.266368	1.3617e-12	3.52284e-10		13382	ENSMUSG00000055799.13	Tcf7l1	923.728	0.66479	0.294495	0.00104431	0.00742985
	153	ENSMUSG00000045709.11	Smkr-ps	35.0905	1.71461	0.375439	4.90713e-08	2.77817e-06		11681	ENSMUSG00000045709.11	Smkr-ps	35.0905	1.36544	0.473067	2.8003e-05	0.000373095
	154	ENSMUSG00000096995.2	2810029C07Rik	19.2965	1.71427	0.430801	5.81447e-07	2.14506e-05		19090	ENSMUSG00000096995.2	2810029C07Rik	19.2965	0.793407	0.49944	0.00304829	0.0174582
	155	ENSMUSG00000079588.3	Tmem182	100.164	1.71012	0.431124	6.21418e-07	2.25587e-05		16336	ENSMUSG00000079588.3	Tmem182	100.164	1.08032	0.545077	0.000541654	0.00437187
	156	ENSMUSG00000025911.14	Adhfe1	199.079	1.70987	0.367206	3.32554e-08	2.04106e-06		4664	ENSMUSG00000025911.14	Adhfe1	199.079	0.318221	0.29985	0.0887095	0.220261
	157	ENSMUSG00000022622.5	Acr	13.8114	1.70815	0.536667	8.5308e-06	0.000187639		3390	ENSMUSG00000022622.5	Acr	13.8114	1.52876	0.70039	0.000182957	0.00178129
	158	ENSMUSG00000011154.17	Cfap161	9.12191	1.70478	0.687995	4.85176e-05	0.000740554		1222	ENSMUSG00000011154.17	Cfap161	9.12191	2.84435	0.75029	2.40095e-06	4.63512e-05
	159	ENSMUSG00000042010.16	Acacb	498.584	1.70428	0.301926	1.98854e-10	2.72764e-08		10908	ENSMUSG00000042010.16	Acacb	498.584	0.447451	0.285879	0.0191703	0.0720969
	160	ENSMUSG00000041653.5	Pnpla3	132.565	1.70277	0.496222	4.13098e-06	0.000105404		10807	ENSMUSG00000041653.5	Pnpla3	132.565	0.183897	0.320752	0.298512	0.499576
	161	ENSMUSG00000097124.2	A530020G20Rik	210.075	1.69896	0.412191	3.55782e-07	1.4399e-05		19137	ENSMUSG00000097124.2	A530020G20Rik	210.075	0.802739	0.477371	0.0023873	0.0143913
	162	ENSMUSG00000067279.3	Ppp1r3c	79.3068	1.69448	0.394624	1.79033e-07	8.01401e-06		14794	ENSMUSG00000067279.3	Ppp1r3c	79.3068	1.23505	0.505602	0.000118417	0.00125187
	163	ENSMUSG00000021238.11	Aldh6a1	1179.54	1.6942	0.260548	1.05182e-12	2.8441e-10		2686	ENSMUSG00000021238.11	Aldh6a1	1179.54	0.784298	0.304059	0.000219253	0.00207488
	164	ENSMUSG00000021806.4	Nid2	722.929	1.69291	0.280451	2.07056e-11	3.8471e-09		2967	ENSMUSG00000021806.4	Nid2	722.929	0.959029	0.342234	5.89445e-05	0.000703521
	165	ENSMUSG00000035275.14	Raver2	96.6001	1.69028	0.356597	2.47632e-08	1.61181e-06		8805	ENSMUSG00000035275.14	Raver2	96.6001	1.14138	0.451544	0.00010366	0.00112918
	166	ENSMUSG00000095576.5	Fmo6	13.2859	1.67774	0.803543	0.000107531	0.00135335		18903	ENSMUSG00000095576.5	Fmo6	13.2859	2.70961	0.979777	4.07755e-05	0.000512926
	167	ENSMUSG00000030739.18	Myh14	50.5056	1.67705	0.533141	1.06204e-05	0.000224234		7063	ENSMUSG00000030739.18	Myh14	50.5056	0.327273	0.387293	0.0940525	0.229393
	168	ENSMUSG00000020674.17	Pxdn	923.114	1.67327	0.310212	9.61782e-10	1.08602e-07		2389	ENSMUSG00000020674.17	Pxdn	923.114	0.612875	0.331005	0.00381677	0.0208363
	169	ENSMUSG00000070498.3	Tmem132b	70.7202	1.6729	0.280903	3.80591e-11	6.42852e-09		15125	ENSMUSG00000070498.3	Tmem132b	70.7202	1.96013	0.31333	5.88653e-12	3.7829e-10
	170	ENSMUSG00000025348.9	Itga7	317.668	1.6716	0.34923	2.18168e-08	1.43836e-06		4433	ENSMUSG00000025348.9	Itga7	317.668	0.39585	0.309145	0.0408785	0.126387
	171	ENSMUSG00000054659.13	Pm20d2	30.3298	1.66863	0.440542	1.4369e-06	4.5042e-05		13219	ENSMUSG00000054659.13	Pm20d2	30.3298	0.379205	0.36609	0.0583525	0.163369
	172	ENSMUSG00000001334.9	Fndc5	27.6199	1.66594	0.444065	1.65108e-06	5.06679e-05		209	ENSMUSG00000001334.9	Fndc5	27.6199	0.749164	0.499319	0.00432119	0.0229748
	173	ENSMUSG00000032816.15	Igdcc4	63.5694	1.66526	0.34027	1.33981e-08	9.58365e-07		8076	ENSMUSG00000032816.15	Igdcc4	63.5694	0.748118	0.394084	0.00174328	0.0112426
	174	ENSMUSG00000087382.7	Ctcflos	123.577	1.66485	0.39584	2.95886e-07	1.22913e-05		17893	ENSMUSG00000087382.7	Ctcflos	123.577	0.605646	0.409709	0.00844475	0.038761
	175	ENSMUSG00000025576.17	Rbfox3	66.7184	1.66146	0.256558	1.5208e-12	3.88525e-10		4542	ENSMUSG00000025576.17	Rbfox3	66.7184	0.754334	0.301977	0.00032424	0.00285585
	176	ENSMUSG00000014725.16	Adam28	13.4343	1.65291	0.531329	1.27682e-05	0.000255243		1362	ENSMUSG00000014725.16	Adam28	13.4343	0.838865	0.606279	0.00410135	0.0220214
	177	ENSMUSG00000037621.8	Atoh8	158.697	1.65289	0.325086	5.50771e-09	4.81053e-07		9488	ENSMUSG00000037621.8	Atoh8	158.697	0.512141	0.322845	0.0119484	0.0506667
	178	ENSMUSG00000084783.1	Gm15419	4.16024	1.65109	0.975845	0.000193436	0.00210851		17086	ENSMUSG00000084783.1	Gm15419	4.16024	0.20956	0.484869	0.224734	0.415895
	179	ENSMUSG00000053353.5	2310001K24Rik	5.36179	1.6479	0.768228	0.000107797	0.00135412		13031	ENSMUSG00000053353.5	2310001K24Rik	5.36179	0.0843354	0.379698	0.594295	0.76205
	180	ENSMUSG00000049791.4	Fzd4	1911.02	1.64589	0.29722	5.05346e-10	6.22184e-08		12439	ENSMUSG00000049791.4	Fzd4	1911.02	1.06266	0.36904	3.7586e-05	0.000478384
	181	ENSMUSG00000110170.1	St6galnac2	41.4354	1.64583	0.315249	2.82252e-09	2.70652e-07		13607	ENSMUSG00000057286.6	St6galnac2	192.955	0.349547	0.22054	0.037473	0.118762
	182	ENSMUSG00000070469.12	Adamtsl3	150.718	1.64462	0.246553	4.58839e-13	1.42087e-10		15119	ENSMUSG00000070469.12	Adamtsl3	150.718	1.41476	0.284034	8.16577e-09	3.06042e-07
	183	ENSMUSG00000040170.13	Fmo2	5352.86	1.63801	0.30995	2.0984e-09	2.16602e-07		10366	ENSMUSG00000040170.13	Fmo2	5352.86	1.73094	0.36033	1.99669e-08	6.83352e-07
	184	ENSMUSG00000046415.11	B430212C06Rik	4.55238	1.63765	0.904863	0.000178321	0.00198504		11806	ENSMUSG00000046415.11	B430212C06Rik	4.55238	0.103693	0.410362	0.508029	0.695485
	185	ENSMUSG00000056174.8	Col8a2	74.1629	1.63573	0.557045	2.14737e-05	0.00038981		13443	ENSMUSG00000056174.8	Col8a2	74.1629	0.799017	0.612223	0.00541964	0.0274511
	186	ENSMUSG00000036466.17	Megf11	12.007	1.63535	0.636953	5.06213e-05	0.000765235		9121	ENSMUSG00000036466.17	Megf11	12.007	3.23728	0.64423	3.02522e-08	9.9366e-07
	187	ENSMUSG00000005124.10	Ccn4	128.845	1.6292	0.343829	3.39421e-08	2.06461e-06		737	ENSMUSG00000005124.10	Ccn4	128.845	1.12265	0.436066	9.22302e-05	0.00102594
	188	ENSMUSG00000039099.7	Wdr93	40.52	1.61972	0.476285	6.27357e-06	0.000146369		10026	ENSMUSG00000039099.7	Wdr93	40.52	0.508489	0.437871	0.0230881	0.0828418
	189	ENSMUSG00000028427.13	Aqp7	147.75	1.61893	0.406113	8.59604e-07	2.93299e-05		5909	ENSMUSG00000028427.13	Aqp7	147.75	1.04835	0.514402	0.000496064	0.0040537
	190	ENSMUSG00000063415.12	Cyp26b1	23.2894	1.61857	0.444076	2.89422e-06	7.99352e-05		14398	ENSMUSG00000063415.12	Cyp26b1	23.2894	1.02062	0.557867	0.000909656	0.00663555
	191	ENSMUSG00000106871.1	Gm3289	11.1069	1.61357	0.517197	1.44018e-05	0.00028113		21005	ENSMUSG00000106871.1	Gm3289	11.1069	0.261896	0.364691	0.15867	0.330839
	192	ENSMUSG00000032548.14	Slco2a1	746.45	1.61104	0.282342	2.3542e-10	3.14479e-08		7968	ENSMUSG00000032548.14	Slco2a1	746.45	1.03949	0.349535	2.81743e-05	0.000374526
	193	ENSMUSG00000075324.13	Fign	84.8421	1.60933	0.359571	1.22952e-07	5.94064e-06		15818	ENSMUSG00000075324.13	Fign	84.8421	1.46564	0.448532	7.98276e-06	0.000129127
	194	ENSMUSG00000062542.11	Syt9	88.3724	1.60634	0.369561	2.16735e-07	9.46503e-06		14281	ENSMUSG00000062542.11	Syt9	88.3724	0.706891	0.416016	0.00333149	0.0187408
	195	ENSMUSG00000070509.15	Rgma	211.068	1.60548	0.3207	1.04736e-08	7.95761e-07		15128	ENSMUSG00000070509.15	Rgma	211.068	0.503243	0.317552	0.0126939	0.0530949
	196	ENSMUSG00000048078.16	Tenm4	746.623	1.60125	0.31412	6.75284e-09	5.5651e-07		12137	ENSMUSG00000048078.16	Tenm4	746.623	0.480365	0.30547	0.0150891	0.0603999
	197	ENSMUSG00000043088.16	Il17re	144.786	1.5964	0.393815	7.35089e-07	2.60439e-05		11192	ENSMUSG00000043088.16	Il17re	144.786	0.347666	0.325391	0.0710833	0.188755
	198	ENSMUSG00000029307.7	Dmp1	103.813	1.59601	0.445661	3.90807e-06	0.000100977		6393	ENSMUSG00000029307.7	Dmp1	103.813	1.29369	0.582121	0.000205211	0.00196161
	199	ENSMUSG00000024903.10	Lao1	6.04067	1.59593	0.896774	0.000210309	0.00225751		4209	ENSMUSG00000024903.10	Lao1	6.04067	2.67366	1.12749	0.000105768	0.00114682
	200	ENSMUSG00000022878.5	Adipoq	954.983	1.59506	0.572304	3.56449e-05	0.000582342		3525	ENSMUSG00000022878.5	Adipoq	954.983	0.547926	0.514451	0.0212331	0.0778459
	201	ENSMUSG00000046070.9	Igfals	141.505	1.59208	0.423645	2.19711e-06	6.4058e-05		11744	ENSMUSG00000046070.9	Igfals	141.505	0.230094	0.307247	0.20365	0.390155
	202	ENSMUSG00000047497.10	Adamts12	165.451	1.59195	0.337708	4.57625e-08	2.64207e-06		12015	ENSMUSG00000047497.10	Adamts12	165.451	0.686399	0.378552	0.00282322	0.0164101
	203	ENSMUSG00000050288.6	Fzd2	56.1951	1.59066	0.393699	7.9333e-07	2.7575e-05		12527	ENSMUSG00000050288.6	Fzd2	56.1951	0.936814	0.487642	0.000876116	0.00642259
	204	ENSMUSG00000074852.4	Hpse2	49.735	1.58922	0.46553	6.78898e-06	0.000156078		15748	ENSMUSG00000074852.4	Hpse2	49.735	1.75727	0.593317	1.87105e-05	0.000266076
	205	ENSMUSG00000063142.15	Kcnma1	20.3014	1.58596	0.496305	1.29634e-05	0.000258232		14358	ENSMUSG00000063142.15	Kcnma1	20.3014	1.41981	0.650733	0.000200594	0.00192448
	206	ENSMUSG00000116903.1	Gm19522	8.71676	1.58571	0.547717	2.8451e-05	0.000484973		23080	ENSMUSG00000116903.1	Gm19522	8.71676	0.784629	0.605138	0.0057638	0.028784
	207	ENSMUSG00000105986.1	Gm43065	9.10986	1.58402	0.599024	5.11515e-05	0.000769834		20830	ENSMUSG00000105986.1	Gm43065	9.10986	1.46072	0.784505	0.00044565	0.00369406
	208	ENSMUSG00000103047.1	Gm37310	40.3674	1.58307	0.598017	5.09981e-05	0.000769225		20144	ENSMUSG00000103047.1	Gm37310	40.3674	0.570708	0.544594	0.0195146	0.0730684
	209	ENSMUSG00000037225.13	Fgf2	210.239	1.58272	0.316425	1.20189e-08	8.80436e-07		9359	ENSMUSG00000037225.13	Fgf2	210.239	0.792564	0.375353	0.000833877	0.00616482
	210	ENSMUSG00000061740.8	Cyp2d22	454.722	1.58242	0.270866	1.247e-10	1.82887e-08		14175	ENSMUSG00000061740.8	Cyp2d22	454.722	0.825652	0.324167	0.000204114	0.0019527
	211	ENSMUSG00000031596.15	Slc7a2	630.913	1.5814	0.230446	1.78237e-13	6.505e-11		7451	ENSMUSG00000031596.15	Slc7a2	630.913	1.49584	0.261459	1.85321e-10	9.63219e-09
	212	ENSMUSG00000027273.13	Snap25	4.98598	1.57988	1.01419	0.000267649	0.00273237		5341	ENSMUSG00000027273.13	Snap25	4.98598	1.58066	1.30632	0.00217133	0.0133445
	213	ENSMUSG00000074715.3	Ccl28	4.79624	1.57925	0.960105	0.000252026	0.00260015		15719	ENSMUSG00000074715.3	Ccl28	4.79624	2.12949	1.29064	0.000589173	0.00466622
	214	ENSMUSG00000041794.13	Myrip	59.659	1.57888	0.43672	3.74683e-06	9.85996e-05		10852	ENSMUSG00000041794.13	Myrip	59.659	0.714812	0.481992	0.00510995	0.0262308
	215	ENSMUSG00000021950.15	Anxa8	37.3411	1.57213	0.61997	6.70958e-05	0.000948343		3034	ENSMUSG00000021950.15	Anxa8	37.3411	0.131914	0.34415	0.436289	0.631483
	216	ENSMUSG00000104432.1	A430027C01Rik	12.1873	1.56922	0.627422	7.27542e-05	0.00100199		20484	ENSMUSG00000104432.1	A430027C01Rik	12.1873	2.15074	0.790543	3.72855e-05	0.000474834
	217	ENSMUSG00000024529.14	Lox	2335.07	1.56795	0.315911	1.56726e-08	1.08582e-06		4028	ENSMUSG00000024529.14	Lox	2335.07	0.834544	0.380325	0.000565986	0.00452961
	218	ENSMUSG00000070867.4	Trabd2b	659.331	1.56593	0.308705	9.18788e-09	7.22238e-07		15179	ENSMUSG00000070867.4	Trabd2b	659.331	0.512432	0.309378	0.0105359	0.045878
	219	ENSMUSG00000044749.13	Abca6	107.776	1.56572	0.343103	1.02827e-07	5.26712e-06		11503	ENSMUSG00000044749.13	Abca6	107.776	1.67968	0.411361	4.28628e-07	1.0333e-05
	220	ENSMUSG00000027750.16	Postn	772.441	1.56465	0.395553	1.21853e-06	3.90963e-05		5577	ENSMUSG00000027750.16	Postn	772.441	0.741079	0.44934	0.00323025	0.0182791
	221	ENSMUSG00000036578.7	Fxyd7	18.0471	1.56329	0.543836	3.24058e-05	0.000538592		9152	ENSMUSG00000036578.7	Fxyd7	18.0471	0.491525	0.475477	0.0293398	0.0994206
	222	ENSMUSG00000039239.14	Tgfb2	76.7633	1.5631	0.381141	7.08805e-07	2.53261e-05		10085	ENSMUSG00000039239.14	Tgfb2	76.7633	1.3453	0.489539	4.32519e-05	0.00054034
	223	ENSMUSG00000086727.8	4931428L18Rik	7.59599	1.55801	0.909355	0.000254113	0.00261772		17683	ENSMUSG00000086727.8	4931428L18Rik	7.59599	1.84711	1.23237	0.000917709	0.00667165
	224	ENSMUSG00000031932.14	Gpr83	16.3401	1.55584	0.493338	1.62688e-05	0.000310749		7641	ENSMUSG00000031932.14	Gpr83	16.3401	1.54801	0.642303	9.79417e-05	0.00107781
	225	ENSMUSG00000033855.15	Ston1	352.689	1.55254	0.243772	5.70862e-12	1.20281e-09		8360	ENSMUSG00000033855.15	Ston1	352.689	1.03736	0.297752	4.35432e-06	7.73669e-05
	226	ENSMUSG00000025586.17	Cpeb1	204.261	1.55248	0.273468	3.81989e-10	4.84836e-08		4550	ENSMUSG00000025586.17	Cpeb1	204.261	1.51173	0.319224	2.74957e-08	9.19726e-07
	227	ENSMUSG00000028600.15	Podn	1008.28	1.55224	0.301105	6.4714e-09	5.39847e-07		6005	ENSMUSG00000028600.15	Podn	1008.28	0.461918	0.291316	0.0167611	0.0653236
	228	ENSMUSG00000000058.6	Cav2	309.092	1.54978	0.324793	4.29654e-08	2.51613e-06		7	ENSMUSG00000000058.6	Cav2	309.092	1.33411	0.406022	7.82324e-06	0.000127331
	229	ENSMUSG00000063430.9	Wscd2	53.037	1.54515	0.409699	2.545e-06	7.21425e-05		14400	ENSMUSG00000063430.9	Wscd2	53.037	0.710807	0.457189	0.00448023	0.0236133
	230	ENSMUSG00000087535.2	Zmiz1os1	20.9279	1.54132	0.523893	2.97254e-05	0.00050209		17946	ENSMUSG00000087535.2	Zmiz1os1	20.9279	0.483542	0.45956	0.0300593	0.101278
	231	ENSMUSG00000030546.14	Plin1	4001.93	1.54065	0.514547	2.61456e-05	0.000453235		6965	ENSMUSG00000030546.14	Plin1	4001.93	0.306172	0.368676	0.110419	0.25664
	232	ENSMUSG00000048486.6	Fitm2	457.062	1.53894	0.268686	3.06938e-10	4.02128e-08		12213	ENSMUSG00000048486.6	Fitm2	457.062	0.625336	0.294821	0.00188232	0.011912
	233	ENSMUSG00000043753.2	Dmrta1	17.7802	1.5385	0.472574	1.30895e-05	0.000260036		11303	ENSMUSG00000043753.2	Dmrta1	17.7802	2.24237	0.54825	4.48762e-07	1.07635e-05
	234	ENSMUSG00000013483.14	Card14	25.6253	1.53585	0.499814	2.17253e-05	0.000393985		1285	ENSMUSG00000013483.14	Card14	25.6253	1.68676	0.648852	5.40346e-05	0.000652264
	235	ENSMUSG00000072941.5	Sod3	1017.14	1.53405	0.327259	6.82728e-08	3.69143e-06		15406	ENSMUSG00000072941.5	Sod3	1017.14	0.568133	0.340231	0.00723984	0.0342773
	236	ENSMUSG00000069806.5	Cacng7	130.839	1.53401	0.303241	1.15513e-08	8.52297e-07		15035	ENSMUSG00000069806.5	Cacng7	130.839	0.936733	0.377004	0.000174078	0.00171105
	237	ENSMUSG00000006958.14	Chrd	49.491	1.53236	0.424494	4.59025e-06	0.000113578		979	ENSMUSG00000006958.14	Chrd	49.491	0.205744	0.30485	0.250114	0.444471
	238	ENSMUSG00000060560.8	Ces4a	5.95123	1.52971	0.780644	0.000209724	0.00225478		14035	ENSMUSG00000060560.8	Ces4a	5.95123	0.338721	0.508269	0.091029	0.224291
	239	ENSMUSG00000004558.15	Ndrg2	1178.66	1.52827	0.273159	6.90274e-10	8.1548e-08		661	ENSMUSG00000004558.15	Ndrg2	1178.66	0.777576	0.322651	0.000378967	0.00322497
	240	ENSMUSG00000055980.2	Irs1	514.614	1.52421	0.285777	2.93568e-09	2.77357e-07		13413	ENSMUSG00000055980.2	Irs1	514.614	0.172144	0.235457	0.310549	0.511504
	241	ENSMUSG00000087022.4	9130024F11Rik	71.1462	1.52036	0.376294	1.07239e-06	3.5294e-05		17774	ENSMUSG00000087022.4	9130024F11Rik	71.1462	0.716087	0.426845	0.00335979	0.0188821
	242	ENSMUSG00000022206.7	Npr3	279.089	1.52026	0.343767	2.33459e-07	1.01305e-05		3162	ENSMUSG00000022206.7	Npr3	279.089	1.93698	0.405016	2.06477e-08	7.03599e-07
	243	ENSMUSG00000040852.6	Plekhh2	631.114	1.51952	0.298515	1.05848e-08	8.01233e-07		10610	ENSMUSG00000040852.6	Plekhh2	631.114	0.918398	0.368974	0.000180369	0.00176117
	244	ENSMUSG00000022579.10	Gpihbp1	806.818	1.51834	0.285668	3.33449e-09	3.05607e-07		3371	ENSMUSG00000022579.10	Gpihbp1	806.818	0.833538	0.344767	0.000295086	0.00264839
	245	ENSMUSG00000052026.8	Slc6a7	7.8136	1.51144	1.04659	0.000350947	0.00337004		12805	ENSMUSG00000052026.8	Slc6a7	7.8136	1.28663	1.27417	0.00447642	0.0235985
	246	ENSMUSG00000040998.18	Npnt	243.31	1.51104	0.395113	2.43309e-06	6.9549e-05		10645	ENSMUSG00000040998.18	Npnt	243.31	0.505564	0.378614	0.0185641	0.0704803
	247	ENSMUSG00000038203.18	Hoxa13	171.374	1.51098	0.365147	7.68838e-07	2.69067e-05		9694	ENSMUSG00000038203.18	Hoxa13	171.374	0.536808	0.365691	0.0125472	0.052649
	248	ENSMUSG00000027412.12	Lpin3	79.9645	1.50827	0.402092	3.1639e-06	8.61035e-05		5422	ENSMUSG00000027412.12	Lpin3	79.9645	0.783102	0.468106	0.0026109	0.0154223
	249	ENSMUSG00000030222.13	Rerg	41.6151	1.50604	0.323311	8.87679e-08	4.61638e-06		6818	ENSMUSG00000030222.13	Rerg	41.6151	1.3433	0.402814	6.60647e-06	0.000110026
	250	ENSMUSG00000108964.1	Gm18600	4.09395	1.50582	1.22502	0.000352192	0.00337939		21510	ENSMUSG00000108964.1	Gm18600	4.09395	0.761085	1.09966	0.019104	0.0719068
	251	ENSMUSG00000097750.2	Gm4673	224.568	1.49973	0.189229	9.94357e-17	7.52692e-14		19370	ENSMUSG00000097750.2	Gm4673	224.568	1.06369	0.223464	1.5447e-08	5.43611e-07
	252	ENSMUSG00000097626.5	4921504A21Rik	5.18772	1.49789	0.832516	0.000284346	0.00285576		19329	ENSMUSG00000097626.5	4921504A21Rik	5.18772	0.541108	0.681436	0.0299423	0.100942
	253	ENSMUSG00000018566.14	Slc2a4	1306.15	1.49764	0.146173	5.79997e-26	2.3708e-22		1760	ENSMUSG00000018566.14	Slc2a4	1306.15	0.942808	0.168255	1.64761e-10	8.63955e-09
	254	ENSMUSG00000105954.1	Gm42793	10.756	1.49652	0.711093	0.000190093	0.00207761		20820	ENSMUSG00000105954.1	Gm42793	10.756	2.75768	0.82883	9.27257e-06	0.000146778
	255	ENSMUSG00000030499.9	Kctd15	157.646	1.49542	0.363002	8.80704e-07	2.99001e-05		6940	ENSMUSG00000030499.9	Kctd15	157.646	0.550297	0.36822	0.0110868	0.0477929
	256	ENSMUSG00000102577.1	Gm37969	12.9831	1.49518	0.640404	0.000129339	0.00155222		20030	ENSMUSG00000102577.1	Gm37969	12.9831	0.465405	0.517459	0.0383409	0.120703
	257	ENSMUSG00000022383.13	Ppara	13.7411	1.49405	0.472643	2.00208e-05	0.000369633		3251	ENSMUSG00000022383.13	Ppara	13.7411	0.593327	0.474941	0.0132128	0.0547039
	258	ENSMUSG00000032850.16	Rnft2	47.0694	1.49303	0.327014	1.42051e-07	6.5833e-06		8087	ENSMUSG00000032850.16	Rnft2	47.0694	0.274575	0.275992	0.12878	0.286099
	259	ENSMUSG00000027955.16	Gask1b	227.32	1.49017	0.376911	1.6713e-06	5.11347e-05		5670	ENSMUSG00000027955.16	Gask1b	227.32	0.885211	0.461147	0.0010155	0.00725743
	260	ENSMUSG00000107451.1	Gm44421	6.63046	1.49	0.750095	0.000231336	0.00242886		21148	ENSMUSG00000107451.1	Gm44421	6.63046	1.72604	1.00653	0.000550319	0.00442972
	261	ENSMUSG00000053044.8	Cd8b1	226.038	1.48858	0.233518	7.74977e-12	1.5839e-09		12977	ENSMUSG00000053044.8	Cd8b1	226.038	1.2988	0.274844	2.40205e-08	8.11516e-07
	262	ENSMUSG00000028967.10	Errfi1	1506.33	1.48697	0.266927	9.71947e-10	1.09146e-07		6212	ENSMUSG00000028967.10	Errfi1	1506.33	1.20603	0.327648	1.90124e-06	3.80072e-05
	263	ENSMUSG00000028194.15	Ddah1	14.4469	1.4861	0.754559	0.000239986	0.00250209		5799	ENSMUSG00000028194.15	Ddah1	14.4469	1.31426	0.97089	0.00184238	0.0117251
	264	ENSMUSG00000089671.1	Gm16537	12.8759	1.48436	0.442596	1.20892e-05	0.000245844		18095	ENSMUSG00000089671.1	Gm16537	12.8759	-2.19747	1.56809	0.0010792	0.00762761
	265	ENSMUSG00000049265.7	Kcnk3	150.822	1.47997	0.386906	2.74351e-06	7.63921e-05		12337	ENSMUSG00000049265.7	Kcnk3	150.822	0.238268	0.294128	0.187523	0.369408
	266	ENSMUSG00000028195.4	Ccn1	567.851	1.47976	0.410803	5.76695e-06	0.000136576		5800	ENSMUSG00000028195.4	Ccn1	567.851	0.941819	0.508272	0.00103192	0.00736164
	267	ENSMUSG00000008734.9	Gprc5b	223.475	1.47917	0.293455	1.64242e-08	1.13405e-06		1083	ENSMUSG00000008734.9	Gprc5b	223.475	0.556751	0.307964	0.00589795	0.0293643
	268	ENSMUSG00000041828.15	Abca8a	520.573	1.4789	0.324477	1.56354e-07	7.1972e-06		10860	ENSMUSG00000041828.15	Abca8a	520.573	1.55381	0.394506	7.52782e-07	1.67003e-05
	269	ENSMUSG00000024222.17	Fkbp5	3192.42	1.47662	0.164442	1.39176e-20	2.18806e-17		3886	ENSMUSG00000024222.17	Fkbp5	3192.42	1.12579	0.188677	2.20264e-11	1.32209e-09
	270	ENSMUSG00000102373.1	9530018H14Rik	10.9564	1.47619	0.579894	9.1796e-05	0.00119499		19988	ENSMUSG00000102373.1	9530018H14Rik	10.9564	1.57094	0.763599	0.000247129	0.00229011
	271	ENSMUSG00000074207.10	Adh1	428.149	1.47353	0.332177	2.69948e-07	1.15182e-05		15601	ENSMUSG00000074207.10	Adh1	428.149	0.671584	0.371237	0.00306406	0.0175206
	272	ENSMUSG00000020532.18	Acaca	1981.26	1.47339	0.296982	2.48855e-08	1.61464e-06		2315	ENSMUSG00000020532.18	Acaca	1981.26	0.355882	0.266895	0.0511501	0.148788
	273	ENSMUSG00000030772.6	Dkk3	180.961	1.46908	0.32919	2.45651e-07	1.0592e-05		7085	ENSMUSG00000030772.6	Dkk3	180.961	1.07352	0.419311	0.000103784	0.00113001
	274	ENSMUSG00000084960.1	B430010I23Rik	11.9593	1.46722	0.627175	0.000141334	0.00166393		17142	ENSMUSG00000084960.1	B430010I23Rik	11.9593	3.07035	0.655927	1.10503e-07	3.13719e-06
	275	ENSMUSG00000039103.12	Nexn	64.9926	1.4652	0.286507	1.21303e-08	8.85424e-07		10028	ENSMUSG00000039103.12	Nexn	64.9926	0.671009	0.326638	0.00170743	0.0110627
	276	ENSMUSG00000039476.13	Prrx2	17.0189	1.46514	0.467102	2.37294e-05	0.000420626		10147	ENSMUSG00000039476.13	Prrx2	17.0189	0.390989	0.389107	0.0551815	0.157038
	277	ENSMUSG00000086746.2	Gm15222	52.6608	1.46513	0.348775	7.27678e-07	2.59551e-05		17692	ENSMUSG00000086746.2	Gm15222	52.6608	1.12194	0.447264	0.000112938	0.00120527
	278	ENSMUSG00000033453.8	Adamts15	123.191	1.46479	0.318487	1.38505e-07	6.50751e-06		8254	ENSMUSG00000033453.8	Adamts15	123.191	0.699502	0.364236	0.00205512	0.0127966
	279	ENSMUSG00000033597.9	Caskin1	62.9258	1.46414	0.4228	9.42158e-06	0.000202267		8293	ENSMUSG00000033597.9	Caskin1	62.9258	0.651735	0.450848	0.00718897	0.0341458
	280	ENSMUSG00000019880.10	Rspo3	229.97	1.46146	0.335091	3.87406e-07	1.53446e-05		1977	ENSMUSG00000019880.10	Rspo3	229.97	0.415991	0.308317	0.0326189	0.107648
	281	ENSMUSG00000034687.8	Fras1	9.69062	1.46127	0.703231	0.000223695	0.00236763		8620	ENSMUSG00000034687.8	Fras1	9.69062	0.525484	0.591692	0.028853	0.0982639
	282	ENSMUSG00000086040.8	Wipf3	113.445	1.45972	0.302004	4.86893e-08	2.7642e-06		17487	ENSMUSG00000086040.8	Wipf3	113.445	0.720031	0.350519	0.00133129	0.00907571
	283	ENSMUSG00000026825.17	Dnm1	79.2738	1.45398	0.428719	1.21019e-05	0.000245844		5134	ENSMUSG00000026825.17	Dnm1	79.2738	0.594833	0.436105	0.0108972	0.047182
	284	ENSMUSG00000045180.13	Shroom2	314.176	1.45349	0.260708	1.11285e-09	1.24287e-07		11580	ENSMUSG00000045180.13	Shroom2	314.176	0.744209	0.30559	0.000411058	0.00345824
	285	ENSMUSG00000087397.1	Rapgef3os2	7.90881	1.45292	0.616799	0.000144226	0.00168707		17898	ENSMUSG00000087397.1	Rapgef3os2	7.90881	0.7337	0.64115	0.00899044	0.0405676
	286	ENSMUSG00000000739.14	Sult5a1	31.3945	1.45168	0.382821	3.42562e-06	9.16441e-05		109	ENSMUSG00000000739.14	Sult5a1	31.3945	0.769924	0.448039	0.00246639	0.0147665
	287	ENSMUSG00000032925.16	Itgbl1	44.4262	1.45041	0.505749	4.92233e-05	0.000749647		8113	ENSMUSG00000032925.16	Itgbl1	44.4262	2.0687	0.628235	6.82885e-06	0.000113013
	288	ENSMUSG00000021994.15	Wnt5a	96.4509	1.44724	0.277639	7.96302e-09	6.48399e-07		3056	ENSMUSG00000021994.15	Wnt5a	96.4509	0.899266	0.343204	0.000125755	0.00131128
	289	ENSMUSG00000031284.16	Pak3	36.016	1.44442	0.42	1.08771e-05	0.000228241		7291	ENSMUSG00000031284.16	Pak3	36.016	1.40013	0.543636	6.87487e-05	0.00080487
	290	ENSMUSG00000036395.15	Glb1l2	263.802	1.44148	0.439087	1.73002e-05	0.000328301		9103	ENSMUSG00000036395.15	Glb1l2	263.802	0.64482	0.460424	0.00806325	0.0373751
	291	ENSMUSG00000055254.15	Ntrk2	131.293	1.43933	0.409679	8.84548e-06	0.000192528		13312	ENSMUSG00000055254.15	Ntrk2	131.293	0.694897	0.451417	0.00494414	0.0255404
	292	ENSMUSG00000040938.16	Slc16a11	14.9307	1.43878	0.581879	0.000121179	0.00147508		10631	ENSMUSG00000040938.16	Slc16a11	14.9307	2.49721	0.677244	2.41235e-06	4.65333e-05
	293	ENSMUSG00000030022.14	Adamts9	443.971	1.43863	0.307781	1.10691e-07	5.53128e-06		6708	ENSMUSG00000030022.14	Adamts9	443.971	0.425179	0.290115	0.0260931	0.0909202
	294	ENSMUSG00000026380.10	Tfcp2l1	13.5844	1.43693	0.615	0.000157981	0.00180482		4894	ENSMUSG00000026380.10	Tfcp2l1	13.5844	1.17961	0.778083	0.00146978	0.0097995
	295	ENSMUSG00000071001.4	Hrct1	165.644	1.43121	0.307262	1.22734e-07	5.94064e-06		15197	ENSMUSG00000071001.4	Hrct1	165.644	0.75223	0.361526	0.00107176	0.0075909
	296	ENSMUSG00000003123.15	Lipe	3777.44	1.42738	0.308341	1.41633e-07	6.58018e-06		486	ENSMUSG00000003123.15	Lipe	3777.44	0.0886205	0.240957	0.600739	0.766241
	297	ENSMUSG00000108132.1	Gm44175	7.93323	1.42592	1.25255	0.000427851	0.00391424		21307	ENSMUSG00000108132.1	Gm44175	7.93323	5.68291	1.19131	1.811e-07	4.83391e-06
	298	ENSMUSG00000029669.14	Tspan12	256.122	1.42503	0.262663	2.87147e-09	2.72963e-07		6590	ENSMUSG00000029669.14	Tspan12	256.122	1.13132	0.325382	4.18482e-06	7.46356e-05
	299	ENSMUSG00000027796.2	Smad9	38.0819	1.42483	0.357039	1.88098e-06	5.66177e-05		5593	ENSMUSG00000027796.2	Smad9	38.0819	0.594877	0.379358	0.00755898	0.0354406
	300	ENSMUSG00000037625.7	Cldn11	65.9414	1.41619	0.500354	6.06017e-05	0.000873397		9491	ENSMUSG00000037625.7	Cldn11	65.9414	0.79453	0.562605	0.00443178	0.0234154
	301	ENSMUSG00000020893.17	Per1	2672.69	1.41618	0.188641	3.97692e-15	2.13896e-12		2523	ENSMUSG00000020893.17	Per1	2672.69	0.950939	0.224063	1.94852e-07	5.14866e-06
	302	ENSMUSG00000045350.15	Fam186a	4.17553	1.4152	1.28836	0.000424781	0.00390538		11617	ENSMUSG00000045350.15	Fam186a	4.17553	0.678488	1.09452	0.0262078	0.091272
	303	ENSMUSG00000041737.8	Tmem45b	279.337	1.41284	0.411477	1.2369e-05	0.000248966		10833	ENSMUSG00000041737.8	Tmem45b	279.337	0.932371	0.506906	0.00109514	0.00771134
	304	ENSMUSG00000050587.14	Lrrc4c	42.4983	1.41209	0.33766	9.61497e-07	3.20572e-05		12570	ENSMUSG00000050587.14	Lrrc4c	42.4983	0.942894	0.423519	0.000371768	0.00317684
	305	ENSMUSG00000074766.10	Ism1	447.327	1.41131	0.284927	3.37767e-08	2.06068e-06		15728	ENSMUSG00000074766.10	Ism1	447.327	0.764408	0.337235	0.000609303	0.00478877
	306	ENSMUSG00000034810.7	Scn7a	235.904	1.41099	0.291974	5.99406e-08	3.30207e-06		8657	ENSMUSG00000034810.7	Scn7a	235.904	1.22344	0.365038	6.42356e-06	0.000107509
	307	ENSMUSG00000028763.18	Hspg2	5288.86	1.41002	0.317863	3.48518e-07	1.41611e-05		6098	ENSMUSG00000028763.18	Hspg2	5288.86	0.389805	0.28886	0.0392558	0.12288
	308	ENSMUSG00000002341.8	Ncan	14.7262	1.40768	0.577138	0.00014429	0.00168707		376	ENSMUSG00000002341.8	Ncan	14.7262	0.00408997	0.325628	0.980065	0.991681
	309	ENSMUSG00000066000.12	Zfp979	74.4559	1.40746	0.278872	2.17295e-08	1.43724e-06		14661	ENSMUSG00000066000.12	Zfp979	74.4559	1.51304	0.327673	4.67288e-08	1.46954e-06
	310	ENSMUSG00000053399.9	Adamts18	7.72379	1.40677	0.565701	0.000131805	0.0015735		13036	ENSMUSG00000053399.9	Adamts18	7.72379	0.0159981	0.331767	0.921635	0.961394
	311	ENSMUSG00000033377.14	Palmd	167.437	1.40461	0.279358	2.41267e-08	1.57541e-06		8230	ENSMUSG00000033377.14	Palmd	167.437	0.438528	0.271938	0.0189203	0.07142
	312	ENSMUSG00000093812.1	Gm5627	18.1089	1.40439	0.515848	8.07861e-05	0.00108697		18701	ENSMUSG00000093812.1	Gm5627	18.1089	1.1857	0.660961	0.000734645	0.0055649
	313	ENSMUSG00000103308.5	Gm37800	7.97676	1.40409	0.625135	0.000208213	0.00223989		20205	ENSMUSG00000103308.5	Gm37800	7.97676	1.70402	0.824008	0.000223393	0.00210731
	314	ENSMUSG00000042807.15	Hecw2	213.772	1.40265	0.268946	9.50598e-09	7.38719e-07		11145	ENSMUSG00000042807.15	Hecw2	213.772	1.38952	0.322016	1.61834e-07	4.38902e-06
	315	ENSMUSG00000035357.17	Pdzrn3	287.944	1.40074	0.327895	7.04543e-07	2.52569e-05		8830	ENSMUSG00000035357.17	Pdzrn3	287.944	0.375237	0.293052	0.0473546	0.140962
	316	ENSMUSG00000028601.18	Echdc2	117.094	1.40033	0.335619	1.04169e-06	3.44501e-05		6006	ENSMUSG00000028601.18	Echdc2	117.094	0.4903	0.329486	0.0161972	0.063714
	317	ENSMUSG00000031565.18	Fgfr1	1886.12	1.39599	0.279566	2.95637e-08	1.84778e-06		7434	ENSMUSG00000031565.18	Fgfr1	1886.12	0.49385	0.28159	0.00998951	0.0440175
	318	ENSMUSG00000085586.1	Gm11613	69.3005	1.39506	0.259147	4.08202e-09	3.64315e-07		17340	ENSMUSG00000085586.1	Gm11613	69.3005	1.25827	0.314285	5.39628e-07	1.26242e-05
	319	ENSMUSG00000032340.8	Neo1	710.91	1.39436	0.316796	4.26506e-07	1.66037e-05		7852	ENSMUSG00000032340.8	Neo1	710.91	0.521576	0.320617	0.0104698	0.0456741
	320	ENSMUSG00000074264.12	Amy1	145.412	1.39353	0.284494	4.71309e-08	2.69067e-06		15625	ENSMUSG00000074264.12	Amy1	145.412	1.15941	0.356443	9.38307e-06	0.000148032
	321	ENSMUSG00000001507.16	Itga3	234.876	1.39049	0.26195	6.17665e-09	5.23811e-07		237	ENSMUSG00000001507.16	Itga3	234.876	0.603012	0.286528	0.0022559	0.0137464
	322	ENSMUSG00000049571.18	Cfap46	5.59882	1.39043	0.78439	0.00042613	0.00391028		12399	ENSMUSG00000049571.18	Cfap46	5.59882	1.34277	1.01303	0.00192062	0.0121186
	323	ENSMUSG00000026442.14	Nfasc	83.9463	1.38566	0.362152	3.86603e-06	0.000100271		4929	ENSMUSG00000026442.14	Nfasc	83.9463	1.859	0.430721	1.63941e-07	4.4208e-06
	324	ENSMUSG00000049241.5	Hcar1	193.836	1.38517	0.456196	4.07321e-05	0.00064684		12336	ENSMUSG00000049241.5	Hcar1	193.836	0.501356	0.418958	0.0229791	0.0825258
	325	ENSMUSG00000021763.17	BC067074	93.6359	1.38506	0.451462	3.75721e-05	0.000607996		2946	ENSMUSG00000021763.17	BC067074	93.6359	0.404294	0.378084	0.0479011	0.141935
	326	ENSMUSG00000015843.10	Rxrg	22.4542	1.38443	0.429322	2.47885e-05	0.000435996		1493	ENSMUSG00000015843.10	Rxrg	22.4542	0.514207	0.410256	0.019816	0.0739503
	327	ENSMUSG00000118076.1	Gm50337	5.63336	1.38351	0.989135	0.000548531	0.00470847		23340	ENSMUSG00000118076.1	Gm50337	5.63336	0.24298	0.525151	0.175601	0.354332
	328	ENSMUSG00000031297.14	Slc7a3	11.6289	1.3826	0.608238	0.000214266	0.00228894		7298	ENSMUSG00000031297.14	Slc7a3	11.6289	1.14014	0.761617	0.00163599	0.0107079
	329	ENSMUSG00000037989.15	Wnk2	66.511	1.38223	0.346614	2.21323e-06	6.43444e-05		9607	ENSMUSG00000037989.15	Wnk2	66.511	0.539152	0.35298	0.0111843	0.0481254
	330	ENSMUSG00000035305.5	Ror1	55.6036	1.38114	0.299185	1.79037e-07	8.01401e-06		8817	ENSMUSG00000035305.5	Ror1	55.6036	1.1143	0.378206	2.81492e-05	0.00037441
	331	ENSMUSG00000078716.10	Tmem8b	160.688	1.37839	0.202359	7.19407e-13	2.10046e-10		16156	ENSMUSG00000078716.10	Tmem8b	160.688	0.750327	0.237132	3.64995e-05	0.000466079
	332	ENSMUSG00000028789.16	Azin2	244.312	1.3739	0.224202	6.24637e-11	9.82025e-09		6111	ENSMUSG00000028789.16	Azin2	244.312	0.803309	0.267419	4.91597e-05	0.000601748
	333	ENSMUSG00000022340.15	Sybu	30.2781	1.37182	0.570266	0.000174471	0.00194642		3229	ENSMUSG00000022340.15	Sybu	30.2781	0.686523	0.581707	0.00997137	0.0439594
	334	ENSMUSG00000031523.16	Dlc1	2260.44	1.37094	0.257432	6.0961e-09	5.21306e-07		7408	ENSMUSG00000031523.16	Dlc1	2260.44	0.49329	0.261662	0.00777031	0.0362442
	335	ENSMUSG00000000782.16	Tcf7	879.805	1.37077	0.153871	4.45712e-20	5.93625e-17		117	ENSMUSG00000000782.16	Tcf7	879.805	0.72607	0.174866	8.00306e-07	1.75637e-05
	336	ENSMUSG00000050390.12	C77080	420.707	1.37048	0.379844	8.35543e-06	0.000184814		12544	ENSMUSG00000050390.12	C77080	420.707	0.670217	0.41598	0.00475395	0.0247744
	337	ENSMUSG00000112300.1	Gm47976	16.3849	1.37043	0.504276	9.17791e-05	0.00119499		22207	ENSMUSG00000112300.1	Gm47976	16.3849	1.44174	0.657244	0.00019058	0.00184563
	338	ENSMUSG00000085095.2	Gm15635	17.3553	1.36998	0.797611	0.000484471	0.00429385		17188	ENSMUSG00000085095.2	Gm15635	17.3553	5.44522	0.729929	1.71259e-14	1.46213e-12
	339	ENSMUSG00000021136.13	Smoc1	1050.91	1.36772	0.300732	2.52895e-07	1.08585e-05		2641	ENSMUSG00000021136.13	Smoc1	1050.91	0.566496	0.316694	0.00576697	0.028791
	340	ENSMUSG00000056870.9	Gulp1	125.736	1.36609	0.313602	5.67728e-07	2.10585e-05		13541	ENSMUSG00000056870.9	Gulp1	125.736	0.833837	0.380996	0.00057667	0.0045949
	341	ENSMUSG00000035828.11	Pim3	1046.62	1.36609	0.243802	1.38664e-09	1.49947e-07		8947	ENSMUSG00000035828.11	Pim3	1046.62	0.612847	0.26815	0.00134191	0.00913789
	342	ENSMUSG00000024972.16	Lgals12	404.342	1.36607	0.417104	2.29039e-05	0.000410263		4251	ENSMUSG00000024972.16	Lgals12	404.342	0.576324	0.418121	0.0116912	0.0498137
	343	ENSMUSG00000022546.5	Gpt	321.35	1.36486	0.263808	1.36277e-08	9.70467e-07		3348	ENSMUSG00000022546.5	Gpt	321.35	0.258626	0.23244	0.129655	0.287313
	344	ENSMUSG00000043903.4	Zfp469	58.3301	1.3643	0.454008	4.72998e-05	0.000724129		11326	ENSMUSG00000043903.4	Zfp469	58.3301	0.21186	0.315564	0.238235	0.430867
	345	ENSMUSG00000027488.12	Snta1	453.764	1.36307	0.271484	2.93206e-08	1.8382e-06		5456	ENSMUSG00000027488.12	Snta1	453.764	0.437381	0.264263	0.0177773	0.068205
	346	ENSMUSG00000116220.1	A430088P11Rik	19.4334	1.35944	0.409409	2.05867e-05	0.000377007		22959	ENSMUSG00000116220.1	A430088P11Rik	19.4334	0.419307	0.365111	0.0402171	0.124979
	347	ENSMUSG00000037681.13	Esyt3	13.062	1.35902	0.844093	0.000550437	0.00471691		9506	ENSMUSG00000037681.13	Esyt3	13.062	1.35233	1.11358	0.00251582	0.0150017
	348	ENSMUSG00000089774.2	Slc5a3	475.324	1.35854	0.286642	1.11988e-07	5.5689e-06		18127	ENSMUSG00000089774.2	Slc5a3	475.324	1.59687	0.33793	2.92461e-08	9.63288e-07
	349	ENSMUSG00000109394.2	A230057D06Rik	7.16132	1.35767	0.799263	0.000515643	0.00449604		21599	ENSMUSG00000109394.2	A230057D06Rik	7.16132	0.720918	0.787166	0.0137832	0.0564723
	350	ENSMUSG00000117294.1	Gm49839	26.5084	1.35696	0.457669	5.35827e-05	0.000797614		23155	ENSMUSG00000117294.1	Gm49839	26.5084	1.20239	0.588989	0.000377027	0.00321308
	351	ENSMUSG00000063594.5	Gng8	2.78656	1.35644	1.25658	0.000506466	0.00443524		14427	ENSMUSG00000063594.5	Gng8	2.78656	0.619308	1.0499	0.0318194	0.105673
	352	ENSMUSG00000076676.2	Ighv12-3	53.1695	1.35566	0.525692	0.000130371	0.00156277		15990	ENSMUSG00000076676.2	Ighv12-3	53.1695	-0.159884	0.330372	0.357931	0.55954
	353	ENSMUSG00000038860.15	Garnl3	94.3675	1.35472	0.258593	1.01537e-08	7.80552e-07		9949	ENSMUSG00000038860.15	Garnl3	94.3675	0.73835	0.304743	0.000439089	0.00365248
	354	ENSMUSG00000026692.12	Fmo4	28.4738	1.35244	0.47369	7.10345e-05	0.000987621		5058	ENSMUSG00000026692.12	Fmo4	28.4738	0.732909	0.518908	0.00548986	0.0277177
	355	ENSMUSG00000078566.8	Bnip3	512.83	1.35189	0.245805	2.58347e-09	2.52636e-07		16123	ENSMUSG00000078566.8	Bnip3	512.83	-0.0544399	0.210598	0.736728	0.857057
	356	ENSMUSG00000073067.10	9130019P16Rik	21.3602	1.34987	0.317464	9.08913e-07	3.07047e-05		15428	ENSMUSG00000073067.10	9130019P16Rik	21.3602	1.10349	0.402202	5.55926e-05	0.000668722
	357	ENSMUSG00000002059.18	Rab34	406.564	1.34984	0.271425	3.87199e-08	2.31622e-06		332	ENSMUSG00000002059.18	Rab34	406.564	0.478122	0.271977	0.0110717	0.0477363
	358	ENSMUSG00000040265.16	Dnm3	93.2695	1.34982	0.27465	5.12092e-08	2.88323e-06		10396	ENSMUSG00000040265.16	Dnm3	93.2695	0.562144	0.293338	0.00453079	0.0238108
	359	ENSMUSG00000019997.11	Ccn2	1137.17	1.34872	0.360848	5.88633e-06	0.00013892		2020	ENSMUSG00000019997.11	Ccn2	1137.17	0.136713	0.265694	0.429967	0.626088
	360	ENSMUSG00000034614.14	Pik3ip1	756.067	1.34712	0.160057	3.64814e-18	3.39534e-15		8593	ENSMUSG00000034614.14	Pik3ip1	756.067	0.854998	0.186429	4.98867e-08	1.56451e-06
	361	ENSMUSG00000028976.10	Slc2a5	4.69304	1.3469	0.997526	0.000626682	0.00518547		6219	ENSMUSG00000028976.10	Slc2a5	4.69304	0.549796	0.812399	0.0336491	0.110037
	362	ENSMUSG00000074771.10	Ankef1	105.195	1.34602	0.410647	2.42596e-05	0.000428909		15729	ENSMUSG00000074771.10	Ankef1	105.195	0.682266	0.446828	0.00535479	0.02721
	363	ENSMUSG00000048126.16	Col6a3	1898.69	1.34382	0.287508	1.58051e-07	7.25897e-06		12145	ENSMUSG00000048126.16	Col6a3	1898.69	0.286592	0.249586	0.103269	0.244784
	364	ENSMUSG00000027996.13	Sfrp2	61.5583	1.3437	0.538171	0.0001608	0.00182885		5688	ENSMUSG00000027996.13	Sfrp2	61.5583	0.647717	0.539222	0.0112102	0.0482193
	365	ENSMUSG00000079071.2	Gm14085	131.332	1.34215	0.235206	8.5223e-10	9.8406e-08		16245	ENSMUSG00000079071.2	Gm14085	131.332	1.55726	0.267697	1.10412e-10	5.92091e-09
	366	ENSMUSG00000048583.16	Igf2	21.5331	1.34115	0.57414	0.000221372	0.00234909		12233	ENSMUSG00000048583.16	Igf2	21.5331	0.841253	0.645702	0.00480749	0.0249818
	367	ENSMUSG00000040037.13	Negr1	177.977	1.34077	0.295759	2.94992e-07	1.22913e-05		10334	ENSMUSG00000040037.13	Negr1	177.977	0.862643	0.362474	0.000298671	0.00267548
	368	ENSMUSG00000030671.9	Pde3b	1098.42	1.33994	0.243045	2.51113e-09	2.47321e-07		7025	ENSMUSG00000030671.9	Pde3b	1098.42	0.586862	0.263451	0.00185439	0.0117842
	369	ENSMUSG00000040187.15	Arntl2	26.0358	1.33981	0.3788	1.15167e-05	0.000237757		10371	ENSMUSG00000040187.15	Arntl2	26.0358	0.905305	0.46512	0.000893011	0.00653025
	370	ENSMUSG00000069835.10	Sat2	43.0065	1.33949	0.330541	2.01104e-06	5.96602e-05		15040	ENSMUSG00000069835.10	Sat2	43.0065	0.590038	0.353159	0.00636104	0.0311196
	371	ENSMUSG00000061816.15	Myl1	63.1361	1.33941	0.534162	0.000159691	0.00181927		14187	ENSMUSG00000061816.15	Myl1	63.1361	2.23132	0.65795	5.31012e-06	9.19993e-05
	372	ENSMUSG00000037990.18	Sh3rf3	71.9517	1.33884	0.376117	1.07663e-05	0.000226846		9608	ENSMUSG00000037990.18	Sh3rf3	71.9517	0.354591	0.318446	0.0651042	0.177373
	373	ENSMUSG00000021033.11	Gstz1	856.127	1.33878	0.222202	1.34149e-10	1.9308e-08		2590	ENSMUSG00000021033.11	Gstz1	856.127	0.28185	0.206213	0.0815004	0.207315
	374	ENSMUSG00000027217.13	Tspan18	509.54	1.33842	0.347608	4.15067e-06	0.000105681		5311	ENSMUSG00000027217.13	Tspan18	509.54	0.61637	0.371658	0.00563877	0.0282964
	375	ENSMUSG00000030513.14	Pcsk6	186.498	1.33686	0.386114	1.45959e-05	0.000283353		6945	ENSMUSG00000030513.14	Pcsk6	186.498	0.401554	0.336916	0.0433394	0.132113
	376	ENSMUSG00000097527.2	1700112J16Rik	5.13892	1.33653	1.18473	0.000576262	0.00487485		19291	ENSMUSG00000097527.2	1700112J16Rik	5.13892	1.83769	1.66094	0.00250876	0.0149671
	377	ENSMUSG00000039063.5	Echdc3	59.0867	1.33622	0.354216	5.45099e-06	0.000130301		10013	ENSMUSG00000039063.5	Echdc3	59.0867	0.4086	0.320998	0.0377185	0.119316
	378	ENSMUSG00000026604.17	Ptpn14	704.28	1.33371	0.245034	3.75134e-09	3.37753e-07		5011	ENSMUSG00000026604.17	Ptpn14	704.28	0.793962	0.292489	0.000136433	0.001401
	379	ENSMUSG00000032232.14	Cgnl1	584.253	1.33258	0.256764	1.40861e-08	9.99624e-07		7789	ENSMUSG00000032232.14	Cgnl1	584.253	0.442391	0.252769	0.0145253	0.0587297
	380	ENSMUSG00000105419.1	Gm43205	12.1576	1.33122	0.460638	7.00649e-05	0.000978132		20690	ENSMUSG00000105419.1	Gm43205	12.1576	1.16807	0.584946	0.000447159	0.00370528
	381	ENSMUSG00000031327.10	Chic1	55.5347	1.32992	0.244768	4.00041e-09	3.58598e-07		7310	ENSMUSG00000031327.10	Chic1	55.5347	1.42377	0.283083	6.50489e-09	2.50544e-07
	382	ENSMUSG00000115099.1	1700087I21Rik	27.1374	1.32943	0.416482	3.24135e-05	0.000538592		22781	ENSMUSG00000115099.1	1700087I21Rik	27.1374	1.3395	0.533783	8.75743e-05	0.000983224
	383	ENSMUSG00000005089.15	Slc1a2	33.4248	1.32535	0.776854	0.000577388	0.00488235		733	ENSMUSG00000005089.15	Slc1a2	33.4248	0.513264	0.635729	0.0331205	0.108807
	384	ENSMUSG00000025202.8	Scd3	8.66548	1.32315	0.613875	0.000323274	0.00316279		4366	ENSMUSG00000025202.8	Scd3	8.66548	0.417459	0.480531	0.0513514	0.149154
	385	ENSMUSG00000028475.9	Spaar	100.042	1.32184	0.309714	9.3206e-07	3.14347e-05		5943	ENSMUSG00000028475.9	Spaar	100.042	1.13353	0.391818	3.29391e-05	0.000426135
	386	ENSMUSG00000037455.16	Slc18b1	151.011	1.32117	0.278176	1.2118e-07	5.93629e-06		9439	ENSMUSG00000037455.16	Slc18b1	151.011	0.636934	0.309708	0.00205786	0.012805
	387	ENSMUSG00000039831.16	Arhgap29	923.773	1.32035	0.264128	3.7754e-08	2.26946e-06		10263	ENSMUSG00000039831.16	Arhgap29	923.773	0.727073	0.30767	0.000553	0.00444373
	388	ENSMUSG00000079654.3	Prrt4	12.2321	1.31743	0.666961	0.00043409	0.00395363		16351	ENSMUSG00000079654.3	Prrt4	12.2321	0.839917	0.73383	0.00659745	0.031972
	389	ENSMUSG00000090210.7	Itga10	68.9	1.31686	0.304579	7.58253e-07	2.66733e-05		18260	ENSMUSG00000090210.7	Itga10	68.9	0.675096	0.345286	0.00213362	0.0131355
	390	ENSMUSG00000031530.6	Dusp4	180.069	1.3167	0.249023	9.01218e-09	7.11162e-07		7411	ENSMUSG00000031530.6	Dusp4	180.069	0.500916	0.256845	0.00643705	0.0313491
	391	ENSMUSG00000064202.15	4430402I18Rik	27.8206	1.31656	0.369166	1.12839e-05	0.000234132		14515	ENSMUSG00000064202.15	4430402I18Rik	27.8206	0.280753	0.299438	0.127674	0.284551
	392	ENSMUSG00000074505.6	Fat3	80.7543	1.31512	0.325942	2.30968e-06	6.65274e-05		15674	ENSMUSG00000074505.6	Fat3	80.7543	0.595191	0.347931	0.00569987	0.0285525
	393	ENSMUSG00000042501.12	Cpa6	12.9975	1.31465	0.5872	0.000289263	0.00289235		11046	ENSMUSG00000042501.12	Cpa6	12.9975	3.2426	0.593276	3.43024e-09	1.39865e-07
	394	ENSMUSG00000030889.14	Vwa3a	14.5686	1.31306	0.44827	6.74879e-05	0.000953007		7147	ENSMUSG00000030889.14	Vwa3a	14.5686	0.676835	0.479793	0.00687989	0.033095
	395	ENSMUSG00000026415.11	Fcamr	7.25957	1.31291	1.00814	0.000704989	0.00563275		4913	ENSMUSG00000026415.11	Fcamr	7.25957	3.66138	1.23879	3.69718e-05	0.000471346
	396	ENSMUSG00000109293.1	Dcst2	34.0793	1.31237	0.312816	1.27262e-06	4.05138e-05		21580	ENSMUSG00000109293.1	Dcst2	34.0793	0.696879	0.359496	0.00199181	0.0124615
	397	ENSMUSG00000039037.5	St6galnac5	17.8145	1.31231	0.553437	0.000229119	0.00240881		10002	ENSMUSG00000039037.5	St6galnac5	17.8145	0.929339	0.652528	0.00295077	0.0169788
	398	ENSMUSG00000085133.2	B930095G15Rik	38.7059	1.30854	0.375371	1.48031e-05	0.000286758		17201	ENSMUSG00000085133.2	B930095G15Rik	38.7059	1.14049	0.478199	0.000158678	0.0015847
	399	ENSMUSG00000074793.10	Hspa12b	300.032	1.30783	0.306751	9.88648e-07	3.29088e-05		15734	ENSMUSG00000074793.10	Hspa12b	300.032	0.744686	0.35834	0.00111575	0.00782279
	400	ENSMUSG00000071604.5	Fam189a2	121.603	1.30431	0.315199	1.62169e-06	4.99769e-05		15281	ENSMUSG00000071604.5	Fam189a2	121.603	0.727474	0.364852	0.00150104	0.00997352
	401	ENSMUSG00000000093.6	Tbx2	416.459	1.30353	0.260867	4.01705e-08	2.37972e-06		11	ENSMUSG00000000093.6	Tbx2	416.459	0.426198	0.25356	0.0184533	0.0701159
	402	ENSMUSG00000067780.3	Pi15	73.8664	1.30329	0.247182	1.01589e-08	7.80552e-07		14834	ENSMUSG00000067780.3	Pi15	73.8664	1.35011	0.291329	3.88096e-08	1.25384e-06
	403	ENSMUSG00000087381.8	Gm16008	54.5867	1.30327	0.339873	4.8649e-06	0.000119076		17892	ENSMUSG00000087381.8	Gm16008	54.5867	-0.16511	0.268937	0.344372	0.546605
	404	ENSMUSG00000059173.19	Pde1a	324.389	1.30187	0.26401	5.53045e-08	3.0715e-06		13838	ENSMUSG00000059173.19	Pde1a	324.389	0.765135	0.312653	0.000358789	0.0030877
	405	ENSMUSG00000020085.15	Aifm2	462.355	1.30098	0.227128	8.69593e-10	9.92891e-08		2067	ENSMUSG00000020085.15	Aifm2	462.355	0.475573	0.231877	0.00626181	0.030758
	406	ENSMUSG00000001802.16	Lrp3	372.951	1.29775	0.290784	4.52655e-07	1.74554e-05		285	ENSMUSG00000001802.16	Lrp3	372.951	0.534277	0.30016	0.00721943	0.0342185
	407	ENSMUSG00000056427.10	Slit3	1292.18	1.29708	0.295144	6.01415e-07	2.20282e-05		13478	ENSMUSG00000056427.10	Slit3	1292.18	0.538203	0.304491	0.00721035	0.0341924
	408	ENSMUSG00000027896.15	Slc16a4	24.5614	1.29651	0.654143	0.000464206	0.00415934		5647	ENSMUSG00000027896.15	Slc16a4	24.5614	5.23135	0.607643	1.70867e-18	2.05119e-16
	409	ENSMUSG00000028517.8	Plpp3	3538.26	1.29581	0.213822	1.26309e-10	1.83086e-08		5956	ENSMUSG00000028517.8	Plpp3	3538.26	0.628153	0.237376	0.000442164	0.00367161
	410	ENSMUSG00000103897.1	Pcdhga8	11.6805	1.29431	0.514806	0.00018353	0.00203146		20342	ENSMUSG00000103897.1	Pcdhga8	11.6805	0.806822	0.577866	0.00440375	0.0233194
	411	ENSMUSG00000006641.12	Slc5a6	254.043	1.29236	0.253981	2.65725e-08	1.69715e-06		948	ENSMUSG00000006641.12	Slc5a6	254.043	0.447425	0.25179	0.0133365	0.0551004
	412	ENSMUSG00000022040.8	Ephx2	214.369	1.28985	0.274603	1.68188e-07	7.62179e-06		3085	ENSMUSG00000022040.8	Ephx2	214.369	0.650527	0.307597	0.00164437	0.0107484
	413	ENSMUSG00000039883.5	Lrrc17	73.4144	1.28938	0.358037	1.09299e-05	0.000229112		10280	ENSMUSG00000039883.5	Lrrc17	73.4144	0.335217	0.302089	0.0752134	0.195851
	414	ENSMUSG00000020424.3	Castor1	181.415	1.28923	0.239883	6.23949e-09	5.26954e-07		2255	ENSMUSG00000020424.3	Castor1	181.415	0.554228	0.256476	0.00274164	0.0159973
	415	ENSMUSG00000038210.10	Hoxa11	118.45	1.28818	0.30905	1.51178e-06	4.71723e-05		9700	ENSMUSG00000038210.10	Hoxa11	118.45	-0.0190933	0.242015	0.909963	0.956003
	416	ENSMUSG00000029096.15	Htra3	994.542	1.28781	0.377054	1.94283e-05	0.000361419		6288	ENSMUSG00000029096.15	Htra3	994.542	0.252107	0.289767	0.164377	0.338711
	417	ENSMUSG00000033863.2	Klf9	1386.79	1.2871	0.219971	4.47942e-10	5.5485e-08		8363	ENSMUSG00000033863.2	Klf9	1386.79	1.14808	0.264467	1.18541e-07	3.34132e-06
	418	ENSMUSG00000031431.13	Tsc22d3	3849.76	1.28638	0.193094	2.83042e-12	6.57365e-10		7360	ENSMUSG00000031431.13	Tsc22d3	3849.76	1.29653	0.222261	7.3276e-11	4.02066e-09
	419	ENSMUSG00000053846.5	Lipg	514.283	1.2862	0.20919	7.61459e-11	1.18799e-08		13099	ENSMUSG00000053846.5	Lipg	514.283	0.662166	0.236377	0.0002172	0.00205828
	420	ENSMUSG00000044177.4	Wfikkn2	19.4291	1.28488	0.336785	5.47097e-06	0.000130581		11386	ENSMUSG00000044177.4	Wfikkn2	19.4291	0.564553	0.354383	0.00855456	0.0391309
	421	ENSMUSG00000032311.17	Nrg4	170.237	1.2839	0.247513	1.66366e-08	1.14484e-06		7833	ENSMUSG00000032311.17	Nrg4	170.237	0.585847	0.269054	0.00211491	0.0130623
	422	ENSMUSG00000048330.14	Ric3	82.4107	1.28365	0.290006	5.47924e-07	2.051e-05		12181	ENSMUSG00000048330.14	Ric3	82.4107	1.25779	0.357994	3.56236e-06	6.53329e-05
	423	ENSMUSG00000018849.6	Wwc1	65.1951	1.28243	0.280044	2.87788e-07	1.20529e-05		1808	ENSMUSG00000018849.6	Wwc1	65.1951	0.471879	0.28066	0.013288	0.0549386
	424	ENSMUSG00000031740.8	Mmp2	1018.07	1.28052	0.333826	5.15503e-06	0.000124361		7526	ENSMUSG00000031740.8	Mmp2	1018.07	0.918783	0.412081	0.000392699	0.00332032
	425	ENSMUSG00000024892.17	Pcx	1504.76	1.27953	0.258199	5.24766e-08	2.92527e-06		4202	ENSMUSG00000024892.17	Pcx	1504.76	0.134884	0.21879	0.413453	0.61111
	426	ENSMUSG00000003534.17	Ddr1	720.582	1.27929	0.25323	3.29949e-08	2.03118e-06		555	ENSMUSG00000003534.17	Ddr1	720.582	0.363564	0.237472	0.0369175	0.117525
	427	ENSMUSG00000040867.13	Begain	51.2252	1.27924	0.279446	2.92294e-07	1.22166e-05		10617	ENSMUSG00000040867.13	Begain	51.2252	0.300317	0.251789	0.0895039	0.221688
	428	ENSMUSG00000070047.14	Fat1	1562.75	1.27895	0.295868	8.4573e-07	2.90017e-05		15069	ENSMUSG00000070047.14	Fat1	1562.75	0.544386	0.306132	0.00678039	0.032731
	429	ENSMUSG00000020297.10	Nsg2	105.296	1.27752	0.226457	1.52105e-09	1.63617e-07		2187	ENSMUSG00000020297.10	Nsg2	105.296	1.11108	0.27448	4.22001e-07	1.02044e-05
	430	ENSMUSG00000041734.15	Kirrel	1352.76	1.27714	0.267476	1.22694e-07	5.94064e-06		10831	ENSMUSG00000041734.15	Kirrel	1352.76	0.574822	0.28575	0.00337273	0.0189458
	431	ENSMUSG00000050222.11	Il17d	175.315	1.27695	0.293534	7.60882e-07	2.67198e-05		12514	ENSMUSG00000050222.11	Il17d	175.315	0.48525	0.292161	0.0125508	0.0526546
	432	ENSMUSG00000021506.7	Pitx1	148.587	1.27647	0.314365	2.33819e-06	6.72123e-05		2818	ENSMUSG00000021506.7	Pitx1	148.587	0.0627661	0.243749	0.710988	0.840698
	433	ENSMUSG00000020098.7	Pcbd1	29.6588	1.27617	0.416184	5.32986e-05	0.000795122		2076	ENSMUSG00000020098.7	Pcbd1	29.6588	0.369691	0.346404	0.0607949	0.168564
	434	ENSMUSG00000002944.15	Cd36	4482.97	1.27571	0.244555	1.46776e-08	1.03441e-06		461	ENSMUSG00000002944.15	Cd36	4482.97	0.84258	0.295468	7.06383e-05	0.000822514
	435	ENSMUSG00000045102.12	Poln	50.9062	1.27565	0.345817	8.55507e-06	0.000187697		11568	ENSMUSG00000045102.12	Poln	50.9062	0.645907	0.377727	0.00434063	0.0230522
	436	ENSMUSG00000033007.15	Asic4	4.92825	1.27467	0.831263	0.00079257	0.00611728		8131	ENSMUSG00000033007.15	Asic4	4.92825	0.512356	0.682388	0.0352791	0.113845
	437	ENSMUSG00000053263.3	Gm12592	14.0316	1.27441	0.417923	5.60014e-05	0.000824015		13015	ENSMUSG00000053263.3	Gm12592	14.0316	0.962693	0.511712	0.000910158	0.00663716
	438	ENSMUSG00000034829.8	Nxnl1	9.06304	1.26977	0.579429	0.000367919	0.0034942		8663	ENSMUSG00000034829.8	Nxnl1	9.06304	0.543433	0.52526	0.0225183	0.0812412
	439	ENSMUSG00000078794.4	Dact3	102.669	1.26963	0.321672	3.59346e-06	9.55526e-05		16175	ENSMUSG00000078794.4	Dact3	102.669	0.455863	0.307919	0.0206182	0.0760687
	440	ENSMUSG00000015134.15	Aldh1a3	13.5166	1.26911	0.489552	0.000169075	0.00190493		1409	ENSMUSG00000015134.15	Aldh1a3	13.5166	1.26787	0.625779	0.000358716	0.0030877
	441	ENSMUSG00000111856.1	6530413G14Rik	25.4219	1.26893	0.469137	0.000131883	0.00157351		22113	ENSMUSG00000111856.1	6530413G14Rik	25.4219	-1.74594	0.906451	0.000317038	0.00280705
	442	ENSMUSG00000044037.15	Als2cl	614.697	1.26844	0.175709	6.17183e-14	2.62792e-11		11356	ENSMUSG00000044037.15	Als2cl	614.697	0.540459	0.188206	0.000440655	0.00366165
	443	ENSMUSG00000021565.16	Slc6a19	16.0902	1.26617	0.628053	0.000493746	0.00436092		2840	ENSMUSG00000021565.16	Slc6a19	16.0902	2.07785	0.824896	6.37121e-05	0.00075374
	444	ENSMUSG00000116597.1	Gm536	9.81269	1.26448	0.625681	0.000493156	0.0043576		23005	ENSMUSG00000116597.1	Gm536	9.81269	0.792847	0.676732	0.00712951	0.0339452
	445	ENSMUSG00000019102.10	Aldh3a1	173.79	1.26336	0.348912	1.10081e-05	0.000230044		1844	ENSMUSG00000019102.10	Aldh3a1	173.79	0.473942	0.331741	0.0197381	0.0737068
	446	ENSMUSG00000019889.10	Ptprk	247.677	1.26283	0.262465	1.07664e-07	5.43317e-06		1979	ENSMUSG00000019889.10	Ptprk	247.677	0.563168	0.279315	0.00360714	0.0199717
	447	ENSMUSG00000084863.1	Gm12523	41.43	1.26185	0.295935	1.11519e-06	3.64093e-05		17116	ENSMUSG00000084863.1	Gm12523	41.43	-2.21984	0.510569	1.54298e-07	4.21361e-06
	448	ENSMUSG00000048772.15	Tmem53	119.973	1.25979	0.189439	3.33379e-12	7.40608e-10		12262	ENSMUSG00000048772.15	Tmem53	119.973	0.288734	0.186263	0.0588231	0.164395
	449	ENSMUSG00000074364.6	Ehd2	3151.87	1.2573	0.307629	2.22198e-06	6.45068e-05		15646	ENSMUSG00000074364.6	Ehd2	3151.87	0.317067	0.265636	0.0793094	0.203536
	450	ENSMUSG00000001665.11	Gstt3	145.112	1.25662	0.257396	7.88038e-08	4.19425e-06		264	ENSMUSG00000001665.11	Gstt3	145.112	0.550427	0.272876	0.00392635	0.0213066
	451	ENSMUSG00000018554.13	Ybx2	39.8434	1.25659	0.319879	3.96652e-06	0.000101716		1757	ENSMUSG00000018554.13	Ybx2	39.8434	0.30173	0.275436	0.0973676	0.23494
	452	ENSMUSG00000030849.18	Fgfr2	1494.01	1.25459	0.254628	6.4064e-08	3.50091e-06		7123	ENSMUSG00000030849.18	Fgfr2	1494.01	0.684545	0.290135	0.000704075	0.00536772
	453	ENSMUSG00000043398.5	Gpr135	42.0405	1.25441	0.386489	3.48129e-05	0.000571031		11243	ENSMUSG00000043398.5	Gpr135	42.0405	0.310388	0.311561	0.0985643	0.236853
	454	ENSMUSG00000020354.15	Sgcd	110.254	1.2543	0.321257	4.34097e-06	0.000108682		2213	ENSMUSG00000020354.15	Sgcd	110.254	0.395443	0.292395	0.0375636	0.119001
	455	ENSMUSG00000051236.13	Msrb3	460.418	1.25236	0.266343	1.81196e-07	8.08578e-06		12680	ENSMUSG00000051236.13	Msrb3	460.418	0.762423	0.314079	0.000385414	0.0032669
	456	ENSMUSG00000113998.1	Gm40909	8.34232	1.25017	0.583864	0.000429298	0.00392221		22559	ENSMUSG00000113998.1	Gm40909	8.34232	0.533443	0.524011	0.0240936	0.0855925
	457	ENSMUSG00000032251.12	Irak1bp1	60.5716	1.25016	0.282427	5.95071e-07	2.18658e-05		7798	ENSMUSG00000032251.12	Irak1bp1	60.5716	0.886758	0.346715	0.000159565	0.00159154
	458	ENSMUSG00000111556.1	Gm19299	22.2508	1.24978	0.434512	9.32463e-05	0.00121078		22061	ENSMUSG00000111556.1	Gm19299	22.2508	0.278811	0.328162	0.135125	0.29583
	459	ENSMUSG00000054863.9	Tafa5	28.8175	1.24935	0.417837	7.01883e-05	0.000979187		13250	ENSMUSG00000054863.9	Tafa5	28.8175	0.385924	0.352515	0.0530333	0.1528
	460	ENSMUSG00000113800.1	2210039B01Rik	21.2186	1.24674	0.46385	0.000146872	0.00171138		22523	ENSMUSG00000113800.1	2210039B01Rik	21.2186	1.10631	0.581674	0.000636877	0.00494756
	461	ENSMUSG00000053977.13	Cd8a	304.736	1.24509	0.222885	2.25296e-09	2.28274e-07		13119	ENSMUSG00000053977.13	Cd8a	304.736	1.06174	0.270784	7.28411e-07	1.62665e-05
	462	ENSMUSG00000057614.6	Gnai1	291.309	1.24479	0.335346	8.56764e-06	0.000187697		13648	ENSMUSG00000057614.6	Gnai1	291.309	0.974765	0.417218	0.000249024	0.00230496
	463	ENSMUSG00000046312.4	Myorg	357.369	1.24449	0.274514	3.84862e-07	1.53329e-05		11784	ENSMUSG00000046312.4	Myorg	357.369	0.671311	0.309771	0.00127713	0.0087483
	464	ENSMUSG00000020805.14	Slc13a5	85.4146	1.24154	0.594387	0.000482407	0.00428485		2467	ENSMUSG00000020805.14	Slc13a5	85.4146	0.771761	0.640291	0.00713504	0.0339601
	465	ENSMUSG00000032238.17	Rora	338.81	1.24132	0.247786	4.45673e-08	2.58769e-06		7791	ENSMUSG00000032238.17	Rora	338.81	0.946039	0.304542	2.09884e-05	0.000293702
	466	ENSMUSG00000075410.13	Prcd	9.04106	1.24116	0.577914	0.000438474	0.00398788		15827	ENSMUSG00000075410.13	Prcd	9.04106	0.295726	0.402917	0.12193	0.275372
	467	ENSMUSG00000030790.15	Adm	26.769	1.24076	0.328999	7.09288e-06	0.00016179		7095	ENSMUSG00000030790.15	Adm	26.769	0.922462	0.404924	0.00033754	0.00294188
	468	ENSMUSG00000024873.7	Cnih2	50.1867	1.23999	0.280319	6.16449e-07	2.24181e-05		4194	ENSMUSG00000024873.7	Cnih2	50.1867	0.764078	0.332001	0.000552672	0.00444348
	469	ENSMUSG00000091764.3	Zfp964	33.0156	1.23885	0.329871	7.51265e-06	0.000170037		18468	ENSMUSG00000091764.3	Zfp964	33.0156	0.859151	0.399285	0.000586934	0.00465317
	470	ENSMUSG00000032332.17	Col12a1	1014.26	1.23802	0.348516	1.4574e-05	0.000283353		7847	ENSMUSG00000032332.17	Col12a1	1014.26	0.598061	0.364141	0.00643275	0.0313473
	471	ENSMUSG00000043102.2	Qrfp	48.7397	1.23801	0.246507	4.22618e-08	2.48918e-06		11196	ENSMUSG00000043102.2	Qrfp	48.7397	0.856006	0.300368	6.76363e-05	0.000793025
	472	ENSMUSG00000052371.5	Hoxd3os1	11.3532	1.23791	0.513034	0.000271739	0.00276309		12862	ENSMUSG00000052371.5	Hoxd3os1	11.3532	0.0777041	0.316738	0.643635	0.794946
	473	ENSMUSG00000033308.16	Dpyd	82.255	1.23663	0.384678	3.98051e-05	0.000634585		8212	ENSMUSG00000033308.16	Dpyd	82.255	0.543546	0.379043	0.0127618	0.0532845
	474	ENSMUSG00000002908.17	Kcnn1	32.873	1.23603	0.347468	1.44168e-05	0.000281155		459	ENSMUSG00000002908.17	Kcnn1	32.873	1.68028	0.404268	3.22112e-07	7.99473e-06
	475	ENSMUSG00000056492.6	Adgrf5	3268.5	1.23561	0.256891	1.15571e-07	5.69167e-06		13487	ENSMUSG00000056492.6	Adgrf5	3268.5	0.85762	0.311488	9.30761e-05	0.00103195
	476	ENSMUSG00000048251.15	Bcl11b	208.439	1.23561	0.157626	6.23046e-16	3.97932e-13		12168	ENSMUSG00000048251.15	Bcl11b	208.439	0.632255	0.176484	1.77842e-05	0.000254588
	477	ENSMUSG00000050556.9	Kcnb1	131.053	1.23328	0.415344	7.74401e-05	0.00105094		12565	ENSMUSG00000050556.9	Kcnb1	131.053	0.445792	0.367379	0.0315202	0.104906
	478	ENSMUSG00000033987.16	Dnah17	53.8042	1.23092	0.302782	2.55761e-06	7.22995e-05		8399	ENSMUSG00000033987.16	Dnah17	53.8042	2.5923	0.326603	5.44481e-17	5.82644e-15
	479	ENSMUSG00000022479.15	Vdr	329.428	1.23036	0.230631	8.95157e-09	7.11162e-07		3308	ENSMUSG00000022479.15	Vdr	329.428	0.51596	0.240616	0.00376334	0.0206065
	480	ENSMUSG00000110496.1	Gm45909	4.29318	1.2299	0.854597	0.000978913	0.00713757		21847	ENSMUSG00000110496.1	Gm45909	4.29318	0.326715	0.555783	0.0998675	0.239287
	481	ENSMUSG00000044674.6	Fzd1	743.359	1.22897	0.255135	1.13481e-07	5.61573e-06		11483	ENSMUSG00000044674.6	Fzd1	743.359	0.652864	0.285637	0.00103964	0.0074033
	482	ENSMUSG00000020154.10	Ptprb	2504.46	1.22886	0.260059	1.72058e-07	7.77989e-06		2111	ENSMUSG00000020154.10	Ptprb	2504.46	0.801142	0.310235	0.000201784	0.00193276
	483	ENSMUSG00000040035.14	Disp2	25.6136	1.22628	0.428761	0.000103843	0.00132233		10333	ENSMUSG00000040035.14	Disp2	25.6136	0.527406	0.408608	0.0174519	0.0671866
	484	ENSMUSG00000046318.16	Ccbe1	353.411	1.22612	0.205737	2.80636e-10	3.70041e-08		11786	ENSMUSG00000046318.16	Ccbe1	353.411	1.10978	0.245548	5.07818e-08	1.58226e-06
	485	ENSMUSG00000048537.16	Phldb1	1070.55	1.2212	0.275217	6.05754e-07	2.21078e-05		12225	ENSMUSG00000048537.16	Phldb1	1070.55	0.29028	0.241383	0.0949975	0.230823
	486	ENSMUSG00000045333.15	Zfp423	371.507	1.22119	0.329385	9.17883e-06	0.000198515		11613	ENSMUSG00000045333.15	Zfp423	371.507	0.206541	0.259265	0.238342	0.430902
	487	ENSMUSG00000031853.5	Map3k21	2.63699	1.22078	1.22329	0.000728767	0.00576961		7596	ENSMUSG00000031853.5	Map3k21	2.63699	0.267835	0.68637	0.151886	0.320936
	488	ENSMUSG00000022577.17	Ly6h	12.8123	1.2204	0.712709	0.000857134	0.00647489		3370	ENSMUSG00000022577.17	Ly6h	12.8123	0.321373	0.475247	0.10196	0.24269
	489	ENSMUSG00000026437.11	Cdk18	383.444	1.21947	0.27281	5.30182e-07	1.99189e-05		4927	ENSMUSG00000026437.11	Cdk18	383.444	0.21884	0.232502	0.197786	0.383029
	490	ENSMUSG00000008090.14	Fgfrl1	773.763	1.21893	0.238702	2.91633e-08	1.83397e-06		1047	ENSMUSG00000008090.14	Fgfrl1	773.763	0.394995	0.230026	0.0217497	0.0791686
	491	ENSMUSG00000025189.9	Cnnm1	250.762	1.21799	0.287074	1.33496e-06	4.2235e-05		4354	ENSMUSG00000025189.9	Cnnm1	250.762	0.44978	0.277632	0.017248	0.0667559
	492	ENSMUSG00000056162.14	Cndp1	12.2735	1.2171	0.496218	0.000268138	0.00273463		13441	ENSMUSG00000056162.14	Cndp1	12.2735	0.257406	0.349539	0.164211	0.338484
	493	ENSMUSG00000022425.16	Enpp2	875.614	1.21634	0.335837	1.22772e-05	0.0002477		3273	ENSMUSG00000022425.16	Enpp2	875.614	0.431404	0.308402	0.0274364	0.0945835
	494	ENSMUSG00000018537.16	Pcgf2	365.67	1.21457	0.202299	2.21693e-10	3.00064e-08		1752	ENSMUSG00000018537.16	Pcgf2	365.67	0.417691	0.203012	0.00949805	0.0423012
	495	ENSMUSG00000032172.8	Olfm2	204.988	1.21312	0.348369	1.92021e-05	0.000358732		7757	ENSMUSG00000032172.8	Olfm2	204.988	0.453005	0.323448	0.0236194	0.0842229
	496	ENSMUSG00000040564.14	Apoc1	48.5462	1.21301	0.515599	0.000332256	0.00323519		10502	ENSMUSG00000040564.14	Apoc1	48.5462	0.172778	0.325328	0.325102	0.527035
	497	ENSMUSG00000048782.15	Insc	19.2745	1.21086	0.529746	0.000380476	0.00358349		12265	ENSMUSG00000048782.15	Insc	19.2745	0.752414	0.57193	0.00618005	0.0304484
	498	ENSMUSG00000054474.15	Thnsl2	77.811	1.21037	0.323504	8.38728e-06	0.000185318		13191	ENSMUSG00000054474.15	Thnsl2	77.811	0.214973	0.259728	0.220743	0.411214
	499	ENSMUSG00000090622.1	A930033H14Rik	83.9085	1.21034	0.292669	2.04956e-06	6.04458e-05		18322	ENSMUSG00000090622.1	A930033H14Rik	83.9085	0.598601	0.314668	0.00371146	0.0204311
	500	ENSMUSG00000060487.7	Samd5	43.2849	1.21014	0.321264	7.70222e-06	0.000172987		14026	ENSMUSG00000060487.7	Samd5	43.2849	1.20654	0.398473	1.97524e-05	0.000279048
	501	ENSMUSG00000035413.8	Tmem98	211.774	1.20578	0.252205	1.39935e-07	6.54461e-06		8848	ENSMUSG00000035413.8	Tmem98	211.774	0.537667	0.26422	0.00412392	0.0221048
	502	ENSMUSG00000003949.16	Hlf	413.892	1.20461	0.200696	2.28769e-10	3.07604e-08		599	ENSMUSG00000003949.16	Hlf	413.892	0.86955	0.239734	3.52176e-06	6.48141e-05
	503	ENSMUSG00000023885.9	Thbs2	508.098	1.20351	0.277732	9.57428e-07	3.19737e-05		3711	ENSMUSG00000023885.9	Thbs2	508.098	1.0282	0.344445	2.75785e-05	0.000368476
	504	ENSMUSG00000029576.17	Radil	13.7658	1.20344	0.497524	0.000300228	0.00298157		6538	ENSMUSG00000029576.17	Radil	13.7658	0.191323	0.329816	0.280814	0.480221
	505	ENSMUSG00000028766.10	Alpl	1453.95	1.20206	0.328526	1.12158e-05	0.000232956		6099	ENSMUSG00000028766.10	Alpl	1453.95	0.41063	0.297565	0.0325446	0.107493
	506	ENSMUSG00000025555.14	Farp1	407.995	1.20129	0.221941	6.31501e-09	5.31137e-07		4535	ENSMUSG00000025555.14	Farp1	407.995	0.411451	0.218717	0.0142608	0.0579672
	507	ENSMUSG00000044646.15	Zbtb7c	28.1089	1.20127	0.40742	8.90497e-05	0.00116592		11480	ENSMUSG00000044646.15	Zbtb7c	28.1089	0.470869	0.372696	0.0253021	0.0888712
	508	ENSMUSG00000025934.15	Gsta3	15.2235	1.20072	0.645937	0.000782853	0.00606059		4677	ENSMUSG00000025934.15	Gsta3	15.2235	1.12076	0.816532	0.00226359	0.0137826
	509	ENSMUSG00000038550.10	Ciart	87.8018	1.20042	0.246869	9.7074e-08	5.0101e-06		9840	ENSMUSG00000038550.10	Ciart	87.8018	1.07701	0.301976	3.05176e-06	5.71426e-05
	510	ENSMUSG00000046761.13	Fam83h	79.4956	1.19947	0.295622	2.80414e-06	7.77626e-05		11876	ENSMUSG00000046761.13	Fam83h	79.4956	0.411813	0.277604	0.0279652	0.0959311
	511	ENSMUSG00000042428.6	Mgat3	40.7357	1.19911	0.308125	5.11358e-06	0.000123682		11023	ENSMUSG00000042428.6	Mgat3	40.7357	0.817323	0.3675	0.000553881	0.0044493
	512	ENSMUSG00000030551.14	Nr2f2	653.469	1.19863	0.272389	7.35265e-07	2.60439e-05		6967	ENSMUSG00000030551.14	Nr2f2	653.469	0.753288	0.318056	0.000478711	0.00393912
	513	ENSMUSG00000049109.15	Themis	61.0272	1.19713	0.230496	1.96722e-08	1.31393e-06		12318	ENSMUSG00000049109.15	Themis	61.0272	1.0109	0.280815	2.84478e-06	5.37349e-05
	514	ENSMUSG00000097430.2	Gm10544	20.8468	1.19654	0.434648	0.000146323	0.00170728		19264	ENSMUSG00000097430.2	Gm10544	20.8468	0.380355	0.359517	0.0568712	0.160587
	515	ENSMUSG00000031340.8	Gabre	17.1486	1.19596	0.463196	0.000217125	0.00231246		7314	ENSMUSG00000031340.8	Gabre	17.1486	0.901415	0.545964	0.00189181	0.011956
	516	ENSMUSG00000030353.15	Tead4	67.269	1.19555	0.348356	2.32856e-05	0.000414487		6890	ENSMUSG00000030353.15	Tead4	67.269	0.297146	0.28559	0.105371	0.24818
	517	ENSMUSG00000010651.4	Acaa1b	37.098	1.19546	0.457493	0.000202874	0.00219151		1205	ENSMUSG00000010651.4	Acaa1b	37.098	0.0453911	0.291372	0.788929	0.886488
	518	ENSMUSG00000020593.16	Lpin1	1326.59	1.1954	0.211429	1.72613e-09	1.82791e-07		2341	ENSMUSG00000020593.16	Lpin1	1326.59	0.456722	0.214178	0.00602902	0.0298723
	519	ENSMUSG00000021390.6	Ogn	1008.95	1.19472	0.369627	4.20045e-05	0.000663437		2765	ENSMUSG00000021390.6	Ogn	1008.95	1.52193	0.453679	5.90126e-06	0.000100307
	520	ENSMUSG00000008845.9	Cd163	1304.98	1.19432	0.378511	5.21818e-05	0.000783033		1087	ENSMUSG00000008845.9	Cd163	1304.98	2.07772	0.438837	2.57804e-08	8.67257e-07
	521	ENSMUSG00000018822.7	Sfrp5	20.9988	1.19399	0.649799	0.000825199	0.00631487		1801	ENSMUSG00000018822.7	Sfrp5	20.9988	2.05607	0.886285	0.000107682	0.00116247
	522	ENSMUSG00000048329.7	Mfsd6l	70.0549	1.19228	0.265997	5.28921e-07	1.99081e-05		12180	ENSMUSG00000048329.7	Mfsd6l	70.0549	0.817071	0.318784	0.000200741	0.00192511
	523	ENSMUSG00000102018.8	Iqank1	11.9554	1.19189	0.555814	0.000523995	0.00454752		19924	ENSMUSG00000102018.8	Iqank1	11.9554	0.861247	0.633006	0.00403831	0.0217693
	524	ENSMUSG00000108624.1	Gm45091	24.5933	1.19011	0.365792	3.99457e-05	0.000635834		21437	ENSMUSG00000108624.1	Gm45091	24.5933	0.153901	0.274192	0.377702	0.578727
	525	ENSMUSG00000028339.17	Col15a1	141.985	1.18809	0.36336	3.82956e-05	0.00061726		5862	ENSMUSG00000028339.17	Col15a1	141.985	0.314234	0.295497	0.0912084	0.224618
	526	ENSMUSG00000024901.15	Peli3	43.022	1.18722	0.392687	7.59229e-05	0.00103793		4207	ENSMUSG00000024901.15	Peli3	43.022	0.234163	0.294205	0.194546	0.378544
	527	ENSMUSG00000024395.9	Lims2	91.8679	1.18709	0.31788	8.99099e-06	0.000195335		3969	ENSMUSG00000024395.9	Lims2	91.8679	0.561772	0.327724	0.00689941	0.0331634
	528	ENSMUSG00000061780.6	Cfd	14246.2	1.18678	0.51438	0.000395499	0.003696		14183	ENSMUSG00000061780.6	Cfd	14246.2	0.129803	0.312911	0.451214	0.644331
	529	ENSMUSG00000025207.16	Sema4g	55.1301	1.18625	0.348348	2.57487e-05	0.000448638		4369	ENSMUSG00000025207.16	Sema4g	55.1301	0.699564	0.387436	0.00270073	0.0158171
	530	ENSMUSG00000054263.12	Lifr	1289.07	1.18558	0.212966	2.83391e-09	2.70652e-07		13155	ENSMUSG00000054263.12	Lifr	1289.07	0.925297	0.256791	3.28202e-06	6.09235e-05
	531	ENSMUSG00000028541.14	B4galt2	176.804	1.18371	0.326102	1.2789e-05	0.000255256		5971	ENSMUSG00000028541.14	B4galt2	176.804	0.34756	0.281836	0.0609669	0.16883
	532	ENSMUSG00000059003.12	Grin2a	3.20388	1.18321	0.900798	0.00118445	0.00821864		13819	ENSMUSG00000059003.12	Grin2a	3.20388	0.203464	0.490118	0.234306	0.427186
	533	ENSMUSG00000025092.7	Hspa12a	258.752	1.18283	0.272169	9.42117e-07	3.17216e-05		4308	ENSMUSG00000025092.7	Hspa12a	258.752	0.793196	0.322223	0.000303138	0.00270729
	534	ENSMUSG00000022665.15	Ccdc80	4160.21	1.18259	0.507924	0.00038477	0.00361393		3408	ENSMUSG00000022665.15	Ccdc80	4160.21	0.247718	0.342276	0.177658	0.35675
	535	ENSMUSG00000050730.17	Arhgap42	139.632	1.18228	0.269112	7.7759e-07	2.71201e-05		12593	ENSMUSG00000050730.17	Arhgap42	139.632	0.921735	0.329041	6.49175e-05	0.000766085
	536	ENSMUSG00000063727.3	Tnfrsf11b	15.9049	1.18228	0.560183	0.00057417	0.00486118		14447	ENSMUSG00000063727.3	Tnfrsf11b	15.9049	0.332134	0.406586	0.0917362	0.225728
	537	ENSMUSG00000038371.15	Sbf2	1239.1	1.18216	0.25925	3.86523e-07	1.53393e-05		9765	ENSMUSG00000038371.15	Sbf2	1239.1	0.749032	0.302021	0.000351257	0.00303947
	538	ENSMUSG00000030074.9	Gxylt2	77.9038	1.18153	0.300643	4.60533e-06	0.000113813		6735	ENSMUSG00000030074.9	Gxylt2	77.9038	0.853891	0.361672	0.000325593	0.00286456
	539	ENSMUSG00000028369.15	Svep1	1305.93	1.18146	0.299156	4.2972e-06	0.000108303		5877	ENSMUSG00000028369.15	Svep1	1305.93	0.705737	0.338562	0.00131947	0.00900556
	540	ENSMUSG00000112907.1	Gm47015	29.1857	1.18061	0.347662	2.68119e-05	0.000462433		22329	ENSMUSG00000112907.1	Gm47015	29.1857	1.74389	0.393846	1.05119e-07	3.0133e-06
	541	ENSMUSG00000055865.8	Tafa3	25.3679	1.18001	0.302964	5.23175e-06	0.000125648		13393	ENSMUSG00000055865.8	Tafa3	25.3679	0.81797	0.361337	0.000493071	0.00403624
	542	ENSMUSG00000036264.9	Fstl4	8.31213	1.17964	0.697379	0.00102627	0.00737861		9066	ENSMUSG00000036264.9	Fstl4	8.31213	1.07922	0.868414	0.00326829	0.0184555
	543	ENSMUSG00000041577.5	Prelp	1515.89	1.1769	0.273952	1.16179e-06	3.76589e-05		10786	ENSMUSG00000041577.5	Prelp	1515.89	0.395868	0.255645	0.0284803	0.0973731
	544	ENSMUSG00000072294.5	Klf12	81.7213	1.17572	0.27969	1.67432e-06	5.11505e-05		15335	ENSMUSG00000072294.5	Klf12	81.7213	0.713041	0.320475	0.000875011	0.00641647
	545	ENSMUSG00000008136.14	Fhl2	497.724	1.17559	0.306704	6.55006e-06	0.000151608		1049	ENSMUSG00000008136.14	Fhl2	497.724	0.644165	0.334103	0.00268632	0.0157522
	546	ENSMUSG00000047528.13	Flacc1	16.7533	1.17559	0.633797	0.00086545	0.0065342		12024	ENSMUSG00000047528.13	Flacc1	16.7533	0.368018	0.463927	0.0725276	0.19113
	547	ENSMUSG00000047878.13	A4galt	305.07	1.17505	0.318422	1.06541e-05	0.000224715		12095	ENSMUSG00000047878.13	A4galt	305.07	0.534149	0.319829	0.00892372	0.0403281
	548	ENSMUSG00000067219.9	Nipal1	10.6493	1.17503	0.552877	0.000574112	0.00486118		14786	ENSMUSG00000067219.9	Nipal1	10.6493	0.805258	0.61161	0.00519716	0.0265965
	549	ENSMUSG00000093759.1	Scarletltr	9.3553	1.17418	0.564189	0.00062055	0.00514933		18693	ENSMUSG00000093759.1	Scarletltr	9.3553	0.234588	0.371263	0.197047	0.38212
	550	ENSMUSG00000022303.9	Dcstamp	34.8057	1.17328	0.560752	0.000610975	0.00509678		3209	ENSMUSG00000022303.9	Dcstamp	34.8057	0.381333	0.428004	0.0634412	0.17397
	551	ENSMUSG00000074971.4	Fibin	94.7515	1.17153	0.323564	1.34776e-05	0.00026614		15773	ENSMUSG00000074971.4	Fibin	94.7515	0.998436	0.399135	0.000143047	0.00145717
	552	ENSMUSG00000006462.6	A530013C23Rik	14.474	1.1711	0.46925	0.000282368	0.00284007		923	ENSMUSG00000006462.6	A530013C23Rik	14.474	0.81288	0.530304	0.00323086	0.0182791
	553	ENSMUSG00000021765.9	Fst	325.566	1.17105	0.290898	3.30934e-06	8.93477e-05		2948	ENSMUSG00000021765.9	Fst	325.566	0.588284	0.307785	0.00387608	0.0210967
	554	ENSMUSG00000029304.14	Spp1	6124.49	1.16838	0.338984	2.35262e-05	0.000417748		6391	ENSMUSG00000029304.14	Spp1	6124.49	0.826229	0.399509	0.000827422	0.00613634
	555	ENSMUSG00000051041.8	Olfml1	86.3362	1.16762	0.341696	2.57986e-05	0.000448974		12647	ENSMUSG00000051041.8	Olfml1	86.3362	0.433936	0.312845	0.0273973	0.0944982
	556	ENSMUSG00000006014.16	Prg4	246.53	1.16661	0.407546	0.000121097	0.00147496		860	ENSMUSG00000006014.16	Prg4	246.53	0.200939	0.289975	0.258852	0.455239
	557	ENSMUSG00000025515.15	Muc2	17.6894	1.16629	0.350873	3.42301e-05	0.000563281		4521	ENSMUSG00000025515.15	Muc2	17.6894	0.824273	0.412273	0.0010021	0.00717925
	558	ENSMUSG00000051855.15	Mest	424.248	1.16586	0.313999	1.00347e-05	0.000213858		12787	ENSMUSG00000051855.15	Mest	424.248	0.038278	0.239624	0.820402	0.90411
	559	ENSMUSG00000030278.11	Cidec	1597.99	1.16583	0.510881	0.000444488	0.00403037		6847	ENSMUSG00000030278.11	Cidec	1597.99	0.196289	0.327347	0.270149	0.467561
	560	ENSMUSG00000063296.5	Tmem117	46.1669	1.1635	0.278823	1.91986e-06	5.76182e-05		14380	ENSMUSG00000063296.5	Tmem117	46.1669	0.622317	0.3055	0.00235381	0.0142439
	561	ENSMUSG00000078234.6	Klhdc7a	183.815	1.1629	0.416782	0.000146353	0.00170728		16080	ENSMUSG00000078234.6	Klhdc7a	183.815	0.263621	0.307937	0.151516	0.320616
	562	ENSMUSG00000078451.5	Ppil6	5.15877	1.16265	0.833822	0.00130003	0.00885172		16101	ENSMUSG00000078451.5	Ppil6	5.15877	0.555866	0.735571	0.029662	0.10023
	563	ENSMUSG00000042641.19	Rgsl1	5.45062	1.16197	0.720159	0.00117941	0.00819613		11091	ENSMUSG00000042641.19	Rgsl1	5.45062	0.705308	0.732321	0.0133354	0.0551004
	564	ENSMUSG00000031748.16	Gnao1	509.035	1.16064	0.287547	3.23045e-06	8.7449e-05		7527	ENSMUSG00000031748.16	Gnao1	509.035	0.405352	0.266861	0.0278045	0.0956573
	565	ENSMUSG00000022661.14	Cd200	449.605	1.1596	0.257711	5.15399e-07	1.94708e-05		3405	ENSMUSG00000022661.14	Cd200	449.605	0.954584	0.314863	2.69073e-05	0.000361757
	566	ENSMUSG00000032338.9	Hcn4	27.3579	1.15837	0.738456	0.0012365	0.00851651		7851	ENSMUSG00000032338.9	Hcn4	27.3579	0.308768	0.481966	0.11155	0.258403
	567	ENSMUSG00000022203.7	Efs	219.653	1.1581	0.324838	1.6516e-05	0.000314882		3159	ENSMUSG00000022203.7	Efs	219.653	0.180011	0.252922	0.298858	0.499859
	568	ENSMUSG00000030351.5	Tspan11	35.2314	1.15797	0.445889	0.000234277	0.00245294		6888	ENSMUSG00000030351.5	Tspan11	35.2314	0.769104	0.495437	0.0035963	0.0199271
	569	ENSMUSG00000026211.17	Obsl1	492.142	1.15737	0.238286	1.06002e-07	5.37585e-06		4821	ENSMUSG00000026211.17	Obsl1	492.142	0.413586	0.231295	0.0167364	0.065238
	570	ENSMUSG00000047419.5	Cmya5	82.5402	1.15737	0.371435	6.32926e-05	0.000902074		12001	ENSMUSG00000047419.5	Cmya5	82.5402	0.486232	0.347838	0.0190837	0.0718763
	571	ENSMUSG00000113536.1	Gm49327	57.6184	1.15734	0.30641	8.18409e-06	0.000182208		22459	ENSMUSG00000113536.1	Gm49327	57.6184	0.882219	0.369384	0.000273313	0.00249367
	573	ENSMUSG00000032262.13	Elovl4	26.9257	1.15644	0.408414	0.000134266	0.00159915		7804	ENSMUSG00000032262.13	Elovl4	26.9257	1.03967	0.501333	0.000457929	0.00378921
	574	ENSMUSG00000078868.3	Gm14412	7.76715	1.15626	0.580207	0.000762627	0.00595367		16191	ENSMUSG00000078868.3	Gm14412	7.76715	0.0648111	0.335762	0.692882	0.829124
	575	ENSMUSG00000037994.14	Slc9b2	128.099	1.15508	0.515219	0.000496992	0.00437824		9612	ENSMUSG00000037994.14	Slc9b2	128.099	0.530237	0.467992	0.0212977	0.0779887
	576	ENSMUSG00000025644.10	Gm7628	13.6467	1.15396	0.576811	0.000759646	0.00594169		4565	ENSMUSG00000025644.10	Gm7628	13.6467	0.294476	0.398046	0.123001	0.27706
	577	ENSMUSG00000034796.14	Cpne7	121.325	1.15342	0.21574	9.59784e-09	7.43033e-07		8652	ENSMUSG00000034796.14	Cpne7	121.325	0.56512	0.23278	0.00129235	0.0088383
	578	ENSMUSG00000100075.1	1700018L02Rik	41.9583	1.1515	0.338595	2.79498e-05	0.000478023		19691	ENSMUSG00000100075.1	1700018L02Rik	41.9583	0.602729	0.35458	0.00558393	0.0280609
	579	ENSMUSG00000031380.10	Vegfd	56.9947	1.15123	0.307903	9.41028e-06	0.000202237		7337	ENSMUSG00000031380.10	Vegfd	56.9947	0.569181	0.319835	0.00577927	0.0288403
	580	ENSMUSG00000028362.2	Tnfsf8	62.1242	1.15093	0.214747	8.98867e-09	7.11162e-07		5874	ENSMUSG00000028362.2	Tnfsf8	62.1242	1.23956	0.24835	6.09551e-09	2.35544e-07
	581	ENSMUSG00000033361.13	Prrg3	124.691	1.15048	0.35573	4.59457e-05	0.000708174		8225	ENSMUSG00000033361.13	Prrg3	124.691	0.588955	0.364036	0.00709971	0.0338579
	582	ENSMUSG00000026489.13	Coq8a	402.152	1.14984	0.204827	2.30536e-09	2.30965e-07		4950	ENSMUSG00000026489.13	Coq8a	402.152	0.366349	0.199704	0.0215084	0.0785804
	583	ENSMUSG00000015468.14	Notch4	654.049	1.14978	0.241211	1.61797e-07	7.41435e-06		1445	ENSMUSG00000015468.14	Notch4	654.049	0.464445	0.240565	0.00875013	0.0397564
	584	ENSMUSG00000051367.8	Six1	522.076	1.14976	0.315969	1.31802e-05	0.000261277		12707	ENSMUSG00000051367.8	Six1	522.076	0.461604	0.299025	0.0179731	0.0687665
	585	ENSMUSG00000021662.11	Arhgef28	104.469	1.14837	0.296282	5.87675e-06	0.000138854		2888	ENSMUSG00000021662.11	Arhgef28	104.469	0.50826	0.295538	0.00964251	0.0427834
	586	ENSMUSG00000023972.10	Ptk7	613.068	1.1474	0.265658	1.1014e-06	3.61324e-05		3749	ENSMUSG00000023972.10	Ptk7	613.068	0.345746	0.241348	0.0483353	0.142832
	587	ENSMUSG00000027257.13	Pacsin3	109.838	1.1472	0.31308	1.21679e-05	0.000246713		5335	ENSMUSG00000027257.13	Pacsin3	109.838	0.157801	0.246469	0.357806	0.559529
	588	ENSMUSG00000013419.7	Zfp651	342.694	1.14636	0.272323	1.70252e-06	5.1857e-05		1283	ENSMUSG00000013419.7	Zfp651	342.694	0.275343	0.236609	0.109804	0.255708
	589	ENSMUSG00000032093.7	Cd3e	204.924	1.14598	0.188272	1.51573e-10	2.16633e-08		7732	ENSMUSG00000032093.7	Cd3e	204.924	0.410538	0.190645	0.00809648	0.0374924
	590	ENSMUSG00000027762.6	Sucnr1	20.4957	1.14593	0.478854	0.000378498	0.0035731		5580	ENSMUSG00000027762.6	Sucnr1	20.4957	0.513905	0.436466	0.0219563	0.0797244
	591	ENSMUSG00000034394.14	Lif	18.6856	1.14422	0.497686	0.000460581	0.00413468		8526	ENSMUSG00000034394.14	Lif	18.6856	0.496023	0.442905	0.0260084	0.0907453
	592	ENSMUSG00000087129.1	Gm16316	23.5646	1.14378	0.332197	2.48816e-05	0.000436881		17804	ENSMUSG00000087129.1	Gm16316	23.5646	0.989833	0.404665	0.000172854	0.00169972
	593	ENSMUSG00000000266.11	Mid2	308.034	1.14282	0.285525	3.7485e-06	9.85996e-05		37	ENSMUSG00000000266.11	Mid2	308.034	0.8243	0.338671	0.000290825	0.00261709
	594	ENSMUSG00000058571.11	Gpc6	285.987	1.14239	0.359711	5.51853e-05	0.000816229		13764	ENSMUSG00000058571.11	Gpc6	285.987	0.569141	0.361043	0.00859166	0.0392247
	595	ENSMUSG00000042686.5	Jph1	30.7484	1.14204	0.41979	0.000182953	0.00202886		11108	ENSMUSG00000042686.5	Jph1	30.7484	0.521755	0.39543	0.017281	0.0667835
	596	ENSMUSG00000085558.7	4930412C18Rik	38.136	1.14201	0.380988	9.03615e-05	0.00117932		17329	ENSMUSG00000085558.7	4930412C18Rik	38.136	0.599249	0.38887	0.00777176	0.0362442
	597	ENSMUSG00000030401.16	Rtn2	89.7651	1.14174	0.292965	5.4985e-06	0.000130977		6902	ENSMUSG00000030401.16	Rtn2	89.7651	0.667688	0.324477	0.00172355	0.0111367
	598	ENSMUSG00000032911.6	Cspg4	96.1422	1.1417	0.379896	8.85485e-05	0.00116084		8109	ENSMUSG00000032911.6	Cspg4	96.1422	0.105377	0.267672	0.540612	0.722966
	599	ENSMUSG00000056679.13	Gpr173	39.7964	1.1406	0.400792	0.000134602	0.00160082		13514	ENSMUSG00000056679.13	Gpr173	39.7964	0.721428	0.438988	0.00354405	0.0196699
	600	ENSMUSG00000041180.13	Hectd2	97.8156	1.14058	0.230594	7.0997e-08	3.82859e-06		10683	ENSMUSG00000041180.13	Hectd2	97.8156	0.399233	0.225555	0.0192026	0.0721632
	601	ENSMUSG00000036306.13	Lzts1	47.2788	1.14052	0.288833	4.57589e-06	0.000113498		9081	ENSMUSG00000036306.13	Lzts1	47.2788	0.0546753	0.234826	0.744759	0.861641
	602	ENSMUSG00000087589.3	D430040D24Rik	53.4216	1.14005	0.28513	3.81997e-06	9.96263e-05		17959	ENSMUSG00000087589.3	D430040D24Rik	53.4216	0.076697	0.233151	0.647677	0.797753
	603	ENSMUSG00000028076.12	Cd1d1	834.972	1.13973	0.24214	2.13914e-07	9.40212e-06		5738	ENSMUSG00000028076.12	Cd1d1	834.972	0.561435	0.255828	0.00240231	0.0144671
	604	ENSMUSG00000022494.15	Shisa9	17.5457	1.13914	0.471317	0.000367359	0.00349213		3316	ENSMUSG00000022494.15	Shisa9	17.5457	0.313903	0.355108	0.102135	0.242925
	605	ENSMUSG00000020902.12	Ntn1	126.57	1.13867	0.470212	0.000364235	0.00347699		2531	ENSMUSG00000020902.12	Ntn1	126.57	0.386253	0.375909	0.0559755	0.158706
	606	ENSMUSG00000031737.11	Irx5	94.3087	1.1368	0.373963	8.1497e-05	0.00109497		7524	ENSMUSG00000031737.11	Irx5	94.3087	0.264403	0.288565	0.146181	0.312749
	607	ENSMUSG00000027546.15	Atp9a	484.749	1.13033	0.304156	1.04713e-05	0.000221774		5483	ENSMUSG00000027546.15	Atp9a	484.749	0.396413	0.275334	0.0332312	0.108991
	608	ENSMUSG00000032492.14	Pth1r	800.217	1.13024	0.300604	9.0251e-06	0.000195812		7938	ENSMUSG00000032492.14	Pth1r	800.217	0.284926	0.252974	0.106803	0.2506
	609	ENSMUSG00000019856.14	Fam184a	80.4786	1.12957	0.207735	6.0833e-09	5.21306e-07		1964	ENSMUSG00000019856.14	Fam184a	80.4786	0.652587	0.234352	0.000244456	0.00227157
	610	ENSMUSG00000034066.13	Farp2	142.186	1.12909	0.282549	3.90135e-06	0.000100931		8420	ENSMUSG00000034066.13	Farp2	142.186	0.15244	0.231509	0.365625	0.566549
	611	ENSMUSG00000051000.17	Fam160a1	159.935	1.12903	0.277101	2.91404e-06	8.03739e-05		12640	ENSMUSG00000051000.17	Fam160a1	159.935	0.399978	0.258269	0.0276376	0.0951661
	612	ENSMUSG00000029675.12	Eln	256.336	1.12848	0.324942	2.32454e-05	0.000414487		6595	ENSMUSG00000029675.12	Eln	256.336	0.464914	0.30573	0.0182205	0.0694659
	613	ENSMUSG00000029661.16	Col1a2	17350	1.12803	0.38322	0.000107537	0.00135335		6588	ENSMUSG00000029661.16	Col1a2	17350	0.480118	0.351558	0.0207855	0.0765425
	614	ENSMUSG00000041193.15	Pla2g5	37.1799	1.12726	0.426017	0.000227049	0.00239074		10686	ENSMUSG00000041193.15	Pla2g5	37.1799	0.47496	0.382417	0.025354	0.0890401
	615	ENSMUSG00000035211.9	Xrra1	7.03267	1.12596	0.724212	0.0014264	0.00948057		8781	ENSMUSG00000035211.9	Xrra1	7.03267	0.657097	0.714343	0.016636	0.0650181
	616	ENSMUSG00000022610.10	Mapk12	321.577	1.12583	0.273912	2.55356e-06	7.22847e-05		3383	ENSMUSG00000022610.10	Mapk12	321.577	0.479102	0.269467	0.0105923	0.0460725
	617	ENSMUSG00000026043.18	Col3a1	2790.24	1.12436	0.39254	0.000133316	0.00158875		4732	ENSMUSG00000026043.18	Col3a1	2790.24	0.373302	0.324378	0.0550265	0.156767
	618	ENSMUSG00000001240.13	Ramp2	478.779	1.12349	0.265844	1.63395e-06	5.02176e-05		194	ENSMUSG00000001240.13	Ramp2	478.779	0.602225	0.284605	0.00220512	0.0135136
	619	ENSMUSG00000040562.12	Gstm2	421.435	1.12308	0.256388	8.79243e-07	2.99001e-05		10500	ENSMUSG00000040562.12	Gstm2	421.435	0.4319	0.247189	0.0157629	0.062358
	620	ENSMUSG00000054252.18	Fgfr3	293.162	1.12252	0.353314	5.71221e-05	0.00083569		13153	ENSMUSG00000054252.18	Fgfr3	293.162	0.445819	0.32055	0.0251327	0.0883551
	621	ENSMUSG00000024430.14	Cabyr	21.3539	1.12179	0.394611	0.000141723	0.00166563		3990	ENSMUSG00000024430.14	Cabyr	21.3539	1.55048	0.466265	6.44286e-06	0.000107756
	622	ENSMUSG00000034957.10	Cebpa	5200.03	1.11995	0.240782	2.78179e-07	1.17711e-05		8705	ENSMUSG00000034957.10	Cebpa	5200.03	-0.0106923	0.204531	0.946662	0.973416
	623	ENSMUSG00000027670.4	Ocstamp	52.0424	1.11985	0.603709	0.00106753	0.00760745		5544	ENSMUSG00000027670.4	Ocstamp	52.0424	0.293366	0.406658	0.124263	0.279077
	624	ENSMUSG00000057530.14	Ece1	2682.14	1.11952	0.254167	7.97864e-07	2.76386e-05		13634	ENSMUSG00000057530.14	Ece1	2682.14	0.368588	0.235491	0.033795	0.110369
	625	ENSMUSG00000037003.16	Tns2	2814.27	1.1179	0.284582	5.05831e-06	0.000122781		9287	ENSMUSG00000037003.16	Tns2	2814.27	0.406816	0.263024	0.0263839	0.0917444
	626	ENSMUSG00000021097.15	Clmn	132.541	1.11771	0.465067	0.000402564	0.00373751		2618	ENSMUSG00000021097.15	Clmn	132.541	0.164837	0.303836	0.347817	0.550239
	627	ENSMUSG00000028713.17	Cyp4b1	832.112	1.1164	0.226864	8.14562e-08	4.30182e-06		6076	ENSMUSG00000028713.17	Cyp4b1	832.112	0.501376	0.232264	0.00405865	0.0218541
	628	ENSMUSG00000050199.13	Lgr4	236.131	1.1151	0.217889	3.15481e-08	1.95245e-06		12510	ENSMUSG00000050199.13	Lgr4	236.131	0.801334	0.256334	3.21109e-05	0.000417232
	629	ENSMUSG00000055407.14	Map6	203.74	1.11404	0.392959	0.000147105	0.00171215		13328	ENSMUSG00000055407.14	Map6	203.74	0.153274	0.27569	0.379774	0.580333
	630	ENSMUSG00000030255.13	Sspn	422.507	1.11337	0.246831	5.13747e-07	1.94444e-05		6833	ENSMUSG00000030255.13	Sspn	422.507	0.679757	0.276882	0.000551846	0.00443898
	631	ENSMUSG00000039620.17	Trmt9b	36.6082	1.11314	0.301661	1.16952e-05	0.000239505		10187	ENSMUSG00000039620.17	Trmt9b	36.6082	0.296855	0.260173	0.096712	0.233842
	632	ENSMUSG00000052302.6	Tbc1d30	106.791	1.11188	0.237003	2.34003e-07	1.01325e-05		12850	ENSMUSG00000052302.6	Tbc1d30	106.791	0.539368	0.248585	0.0029871	0.0171544
	633	ENSMUSG00000039209.12	Rpl39l	26.5713	1.11187	0.33617	3.96758e-05	0.000633017		10071	ENSMUSG00000039209.12	Rpl39l	26.5713	0.505474	0.327508	0.0134197	0.0553763
	634	ENSMUSG00000021253.7	Tgfb3	302.478	1.11173	0.248202	5.87726e-07	2.16431e-05		2696	ENSMUSG00000021253.7	Tgfb3	302.478	0.325129	0.226534	0.055635	0.158024
	635	ENSMUSG00000082226.3	Gm715	10.9326	1.11054	0.513832	0.000668366	0.00541636		16679	ENSMUSG00000082226.3	Gm715	10.9326	0.214668	0.343148	0.232439	0.424995
	636	ENSMUSG00000047907.11	Tshz2	674.688	1.11027	0.274653	3.34633e-06	9.01085e-05		12104	ENSMUSG00000047907.11	Tshz2	674.688	0.342463	0.24548	0.0520637	0.150731
	637	ENSMUSG00000037664.13	Cdkn1c	495.859	1.10985	0.373177	0.000102974	0.00131619		9502	ENSMUSG00000037664.13	Cdkn1c	495.859	0.201848	0.274321	0.253689	0.448728
	638	ENSMUSG00000027253.15	Lrp4	759.745	1.10903	0.265353	1.98523e-06	5.92354e-05		5332	ENSMUSG00000027253.15	Lrp4	759.745	0.546736	0.273559	0.00419711	0.0224344
	639	ENSMUSG00000111763.1	Gm34973	7.09248	1.10887	0.653719	0.00135268	0.00914222		22098	ENSMUSG00000111763.1	Gm34973	7.09248	0.209307	0.396554	0.236298	0.429367
	640	ENSMUSG00000092675.1	Gm25262	7.11299	1.10721	0.595776	0.00111375	0.00785193		18607	ENSMUSG00000092675.1	Gm25262	7.11299	-3.06598	1.8368	0.000507896	0.00414466
	641	ENSMUSG00000031502.11	Col4a1	5019.54	1.10697	0.276969	3.97831e-06	0.000101891		7396	ENSMUSG00000031502.11	Col4a1	5019.54	0.11239	0.224093	0.498792	0.687255
	642	ENSMUSG00000050103.18	Agmo	176.191	1.10632	0.274718	3.55558e-06	9.47443e-05		12492	ENSMUSG00000050103.18	Agmo	176.191	0.972265	0.333306	3.87023e-05	0.000490235
	643	ENSMUSG00000020092.9	Pald1	356.809	1.10615	0.268137	2.45246e-06	7.00048e-05		2074	ENSMUSG00000020092.9	Pald1	356.809	0.440751	0.25711	0.0156696	0.0621449
	644	ENSMUSG00000033278.10	Ptprm	713.903	1.10604	0.299824	1.18355e-05	0.000241173		8204	ENSMUSG00000033278.10	Ptprm	713.903	0.499473	0.293014	0.0105265	0.045854
	645	ENSMUSG00000031169.13	Porcn	288.388	1.10395	0.302521	1.35645e-05	0.000267598		7249	ENSMUSG00000031169.13	Porcn	288.388	0.526476	0.301317	0.00810278	0.0375017
	646	ENSMUSG00000019899.17	Lama2	522.984	1.10375	0.321477	2.72905e-05	0.000468315		1983	ENSMUSG00000019899.17	Lama2	522.984	0.622993	0.339024	0.00371565	0.0204352
	647	ENSMUSG00000048402.14	Gli2	62.9183	1.10368	0.444348	0.000351021	0.00337004		12195	ENSMUSG00000048402.14	Gli2	62.9183	0.30698	0.33338	0.1057	0.248725
	648	ENSMUSG00000022847.15	Thpo	12.0368	1.10195	0.560848	0.000967664	0.00707411		3508	ENSMUSG00000022847.15	Thpo	12.0368	0.141852	0.338298	0.40744	0.605514
	649	ENSMUSG00000021708.17	Rasgrf2	357.051	1.10171	0.237814	3.05055e-07	1.26209e-05		2916	ENSMUSG00000021708.17	Rasgrf2	357.051	0.864685	0.283477	3.25604e-05	0.000421929
	650	ENSMUSG00000030088.15	Aldh1l1	247.009	1.10114	0.254022	1.07542e-06	3.53366e-05		6744	ENSMUSG00000030088.15	Aldh1l1	247.009	-0.0135712	0.212531	0.933421	0.966562
	651	ENSMUSG00000002475.16	Abhd3	36.5471	1.10087	0.396153	0.000174746	0.00194843		395	ENSMUSG00000002475.16	Abhd3	36.5471	0.480213	0.362227	0.0219695	0.0797476
	652	ENSMUSG00000028919.11	Arhgef19	34.5628	1.10068	0.489709	0.000583856	0.00492686		6184	ENSMUSG00000028919.11	Arhgef19	34.5628	0.289785	0.351157	0.125219	0.280649
	653	ENSMUSG00000043673.11	Kcns3	85.2994	1.10026	0.334256	4.23693e-05	0.00066611		11292	ENSMUSG00000043673.11	Kcns3	85.2994	0.652903	0.357808	0.00325173	0.0183752
	654	ENSMUSG00000039114.16	Nrn1	12.9012	1.09992	0.530893	0.000814085	0.00625029		10032	ENSMUSG00000039114.16	Nrn1	12.9012	0.28028	0.371548	0.136873	0.298617
	655	ENSMUSG00000004105.8	Angptl2	729.717	1.09799	0.266828	2.56705e-06	7.24661e-05		620	ENSMUSG00000004105.8	Angptl2	729.717	0.361622	0.242714	0.039784	0.124107
	656	ENSMUSG00000033576.12	Apol6	301.22	1.09699	0.473689	0.000513964	0.00448331		8282	ENSMUSG00000033576.12	Apol6	301.22	0.263509	0.331991	0.154869	0.325482
	657	ENSMUSG00000058317.12	Ube2e2	104.679	1.09684	0.279047	5.11275e-06	0.000123682		13731	ENSMUSG00000058317.12	Ube2e2	104.679	0.665128	0.307441	0.00133526	0.00909756
	658	ENSMUSG00000024866.10	Acy3	302.73	1.09532	0.208278	1.56493e-08	1.08582e-06		4188	ENSMUSG00000024866.10	Acy3	302.73	0.33195	0.198925	0.036694	0.11703
	659	ENSMUSG00000030249.15	Abcc9	2090.81	1.09521	0.22948	1.63523e-07	7.46133e-06		6831	ENSMUSG00000030249.15	Abcc9	2090.81	0.676866	0.256981	0.000331096	0.00289689
	660	ENSMUSG00000020431.5	Adcy1	11.4182	1.09512	0.54359	0.000913247	0.00680474		2258	ENSMUSG00000020431.5	Adcy1	11.4182	0.373448	0.418984	0.0668136	0.180683
	661	ENSMUSG00000102758.3	Naaladl2	46.9652	1.0947	0.349108	6.75508e-05	0.000953007		20070	ENSMUSG00000102758.3	Naaladl2	46.9652	0.556015	0.347655	0.00889237	0.040248
	662	ENSMUSG00000030757.13	Zkscan2	28.7297	1.09416	0.503686	0.000689914	0.00553828		7075	ENSMUSG00000030757.13	Zkscan2	28.7297	0.662789	0.513411	0.00906444	0.0408267
	663	ENSMUSG00000045092.8	S1pr1	1267.45	1.09358	0.226576	1.27756e-07	6.11496e-06		11563	ENSMUSG00000045092.8	S1pr1	1267.45	0.924703	0.27147	7.17892e-06	0.00011831
	664	ENSMUSG00000020814.13	Mxra7	189.832	1.09334	0.300303	1.41145e-05	0.000277084		2473	ENSMUSG00000020814.13	Mxra7	189.832	0.496847	0.292766	0.0108651	0.0470601
	665	ENSMUSG00000031618.13	Nr3c2	132.85	1.09277	0.272942	3.921e-06	0.000101182		7463	ENSMUSG00000031618.13	Nr3c2	132.85	0.606379	0.291189	0.00232918	0.0141238
	666	ENSMUSG00000031486.15	Adgra2	1220.96	1.09262	0.272293	3.79234e-06	9.93689e-05		7387	ENSMUSG00000031486.15	Adgra2	1220.96	0.498071	0.269725	0.00811112	0.0375308
	667	ENSMUSG00000019846.11	Lama4	722.995	1.09202	0.294841	1.1424e-05	0.000236559		1956	ENSMUSG00000019846.11	Lama4	722.995	0.357867	0.260107	0.047801	0.141767
	668	ENSMUSG00000037086.3	Prr32	10.4146	1.09079	0.879709	0.00171786	0.010907		9313	ENSMUSG00000037086.3	Prr32	10.4146	1.08518	1.14618	0.00646391	0.0314537
	669	ENSMUSG00000080316.11	Spaca6	199.996	1.09032	0.228515	1.64667e-07	7.49547e-06		16384	ENSMUSG00000080316.11	Spaca6	199.996	0.616337	0.249106	0.000787648	0.00589465
	670	ENSMUSG00000039911.13	Spsb1	323.838	1.09021	0.285298	7.60914e-06	0.000171727		10288	ENSMUSG00000039911.13	Spsb1	323.838	0.284937	0.243448	0.102084	0.242851
	671	ENSMUSG00000001656.3	Hoxc11	31.8033	1.08928	0.363515	0.000100778	0.00129786		260	ENSMUSG00000001656.3	Hoxc11	31.8033	0.565892	0.362523	0.00900475	0.0406245
	672	ENSMUSG00000020131.14	Pcsk4	161.021	1.08791	0.158892	1.19655e-12	3.17599e-10		2097	ENSMUSG00000020131.14	Pcsk4	161.021	0.515934	0.17042	0.00033067	0.00289523
	673	ENSMUSG00000019929.16	Dcn	2302.04	1.08657	0.30809	2.07031e-05	0.00037847		1991	ENSMUSG00000019929.16	Dcn	2302.04	1.04544	0.375406	5.28922e-05	0.000640475
	674	ENSMUSG00000020241.13	Col6a2	2539.53	1.08632	0.298238	1.41375e-05	0.000277084		2154	ENSMUSG00000020241.13	Col6a2	2539.53	0.085523	0.231905	0.610013	0.772404
	675	ENSMUSG00000030281.16	Il17rc	155.447	1.08567	0.282112	6.93836e-06	0.000158976		6849	ENSMUSG00000030281.16	Il17rc	155.447	0.26862	0.24031	0.120616	0.273231
	676	ENSMUSG00000109270.1	Gm10584	15.6544	1.0851	0.377797	0.000141973	0.00166666		21573	ENSMUSG00000109270.1	Gm10584	15.6544	0.0816911	0.273257	0.633931	0.788469
	677	ENSMUSG00000020176.17	Grb10	538.848	1.08495	0.216267	5.2129e-08	2.92527e-06		2123	ENSMUSG00000020176.17	Grb10	538.848	0.551912	0.228101	0.00145749	0.00974203
	678	ENSMUSG00000052974.8	Cyp2f2	1647.88	1.08392	0.525503	0.000872891	0.0065758		12966	ENSMUSG00000052974.8	Cyp2f2	1647.88	-0.0195487	0.303967	0.90709	0.95426
	679	ENSMUSG00000042104.18	Uggt2	59.2811	1.08214	0.287368	9.30983e-06	0.000200923		10929	ENSMUSG00000042104.18	Uggt2	59.2811	1.28707	0.337535	1.16061e-06	2.45283e-05
	680	ENSMUSG00000051225.9	Fam83a	42.2231	1.08166	0.46052	0.000501175	0.00440371		12675	ENSMUSG00000051225.9	Fam83a	42.2231	0.217892	0.315403	0.226578	0.417902
	681	ENSMUSG00000052013.15	Btla	1478.06	1.0814	0.266319	3.18986e-06	8.66946e-05		12804	ENSMUSG00000052013.15	Btla	1478.06	0.641601	0.289227	0.00133032	0.00907169
	682	ENSMUSG00000073988.13	Ttpa	42.3858	1.08134	0.313051	2.6297e-05	0.000454703		15567	ENSMUSG00000073988.13	Ttpa	42.3858	0.985742	0.3769	0.000102622	0.00112097
	683	ENSMUSG00000001119.7	Col6a1	3061.59	1.08106	0.281152	7.04308e-06	0.000160834		173	ENSMUSG00000001119.7	Col6a1	3061.59	0.108857	0.225181	0.512988	0.699997
	684	ENSMUSG00000052698.15	Tln2	863.083	1.081	0.296703	1.41674e-05	0.000277084		12920	ENSMUSG00000052698.15	Tln2	863.083	0.321561	0.25458	0.0711853	0.188877
	685	ENSMUSG00000020377.15	Ltc4s	344.63	1.08024	0.337459	5.71629e-05	0.00083569		2227	ENSMUSG00000020377.15	Ltc4s	344.63	-0.894619	0.408318	0.000470218	0.00388274
	686	ENSMUSG00000076476.1	Trbv20	3.3871	1.07965	1.07789	0.0013296	0.00901005		15895	ENSMUSG00000076476.1	Trbv20	3.3871	3.00252	1.76993	0.000486287	0.00399312
	687	ENSMUSG00000053647.4	Gper1	65.0096	1.07881	0.439989	0.000402864	0.00373751		13071	ENSMUSG00000053647.4	Gper1	65.0096	0.383018	0.355889	0.0549876	0.156694
	688	ENSMUSG00000098221.1	Gm27030	5.00708	1.07873	0.817333	0.00186822	0.011636		19504	ENSMUSG00000098221.1	Gm27030	5.00708	0.260304	0.503694	0.156209	0.327557
	689	ENSMUSG00000053552.14	Ebf4	33.7185	1.07814	0.377781	0.00015105	0.00174712		13053	ENSMUSG00000053552.14	Ebf4	33.7185	0.303846	0.299926	0.102304	0.243202
	690	ENSMUSG00000023067.14	Cdkn1a	379.199	1.07743	0.222937	1.24334e-07	5.99325e-06		3619	ENSMUSG00000023067.14	Cdkn1a	379.199	0.742611	0.256073	9.55543e-05	0.00105596
	691	ENSMUSG00000024223.3	Armc12	29.495	1.07667	0.315359	3.00156e-05	0.000505217		3887	ENSMUSG00000024223.3	Armc12	29.495	0.553088	0.319567	0.00704762	0.033691
	692	ENSMUSG00000054013.6	Tmem179	50.6573	1.07595	0.995329	0.00156093	0.0101762		13124	ENSMUSG00000054013.6	Tmem179	50.6573	8.09475	1.06724	5.57408e-16	5.46977e-14
	693	ENSMUSG00000040133.2	Gpr176	213.097	1.07593	0.244232	8.12736e-07	2.80586e-05		10354	ENSMUSG00000040133.2	Gpr176	213.097	0.679769	0.272585	0.000493245	0.00403624
	694	ENSMUSG00000038665.15	Dgki	32.4709	1.07574	0.542182	0.00102758	0.00738195		9881	ENSMUSG00000038665.15	Dgki	32.4709	0.512972	0.481646	0.025296	0.088863
	695	ENSMUSG00000055633.6	Zfp580	249.022	1.07434	0.227229	2.00786e-07	8.86321e-06		13357	ENSMUSG00000055633.6	Zfp580	249.022	0.32609	0.211657	0.0471913	0.140646
	696	ENSMUSG00000001506.10	Col1a1	16800	1.07421	0.607692	0.00142502	0.00947451		236	ENSMUSG00000001506.10	Col1a1	16800	0.327605	0.427079	0.0960889	0.232805
	697	ENSMUSG00000021259.5	Cyp46a1	22.9399	1.0739	0.384635	0.000179009	0.00199053		2702	ENSMUSG00000021259.5	Cyp46a1	22.9399	0.436589	0.34145	0.0309627	0.10354
	698	ENSMUSG00000020105.9	Lrig3	143.363	1.07355	0.260097	2.47814e-06	7.05407e-05		2081	ENSMUSG00000020105.9	Lrig3	143.363	0.402712	0.244553	0.0231808	0.0830609
	699	ENSMUSG00000009739.17	Pou6f1	1091.06	1.07348	0.219955	9.96665e-08	5.13094e-06		1150	ENSMUSG00000009739.17	Pou6f1	1091.06	0.52882	0.228093	0.00224889	0.0137249
	700	ENSMUSG00000006576.16	Slc4a3	138.343	1.07286	0.268785	4.15217e-06	0.000105681		940	ENSMUSG00000006576.16	Slc4a3	138.343	0.622191	0.288732	0.00176412	0.0113461
	701	ENSMUSG00000051984.13	Sec31b	172.46	1.07172	0.243623	8.34774e-07	2.87708e-05		12800	ENSMUSG00000051984.13	Sec31b	172.46	0.265634	0.217252	0.109264	0.254694
	702	ENSMUSG00000001036.17	Epn2	453.276	1.07158	0.271325	4.85511e-06	0.000118979		159	ENSMUSG00000001036.17	Epn2	453.276	0.515672	0.271362	0.00642798	0.0313369
	703	ENSMUSG00000097170.1	Gm16982	4.9464	1.07114	1.07199	0.00137507	0.00923246		19158	ENSMUSG00000097170.1	Gm16982	4.9464	5.9098	1.15455	3.22609e-08	1.05378e-06
	704	ENSMUSG00000025150.10	Cbr2	445.976	1.07032	0.454287	0.000509223	0.00445336		4330	ENSMUSG00000025150.10	Cbr2	445.976	0.0939222	0.288352	0.584153	0.754621
	705	ENSMUSG00000022199.12	Slc22a17	379.554	1.06966	0.275329	6.14801e-06	0.000143933		3156	ENSMUSG00000022199.12	Slc22a17	379.554	0.303462	0.239213	0.0803591	0.205261
	706	ENSMUSG00000021789.14	Sftpa1	13.7819	1.06948	0.496861	0.000774356	0.00602218		2961	ENSMUSG00000021789.14	Sftpa1	13.7819	0.995764	0.596295	0.00142897	0.00960864
	707	ENSMUSG00000034377.10	Tulp4	639.599	1.06935	0.220841	1.1907e-07	5.84991e-06		8521	ENSMUSG00000034377.10	Tulp4	639.599	0.364617	0.209801	0.0260294	0.0907919
	708	ENSMUSG00000020099.8	Unc5b	410.5	1.06924	0.266954	3.9505e-06	0.000101479		2077	ENSMUSG00000020099.8	Unc5b	410.5	0.372081	0.243474	0.034875	0.112965
	709	ENSMUSG00000104720.1	Gm43138	7.34909	1.06894	0.635274	0.00160913	0.0103975		20548	ENSMUSG00000104720.1	Gm43138	7.34909	1.19492	0.824303	0.00168645	0.0109495
	710	ENSMUSG00000042340.6	Ctf1	18.3331	1.06834	0.534793	0.00102996	0.00739124		10991	ENSMUSG00000042340.6	Ctf1	18.3331	0.182012	0.337532	0.301099	0.501999
	711	ENSMUSG00000060621.6	Nkpd1	10.4694	1.06754	0.460903	0.000558928	0.00476769		14044	ENSMUSG00000060621.6	Nkpd1	10.4694	0.455338	0.401501	0.0324639	0.107316
	712	ENSMUSG00000086544.1	Chn1os3	22.4664	1.06732	0.438425	0.000431751	0.00393759		17631	ENSMUSG00000086544.1	Chn1os3	22.4664	0.515638	0.404579	0.0190879	0.0718804
	713	ENSMUSG00000063382.6	Bcl9l	2282.4	1.06671	0.233181	3.96088e-07	1.56002e-05		14392	ENSMUSG00000063382.6	Bcl9l	2282.4	0.150177	0.202305	0.346276	0.548621
	714	ENSMUSG00000034910.5	Pygo1	126.646	1.0661	0.344255	7.90631e-05	0.0010673		8691	ENSMUSG00000034910.5	Pygo1	126.646	0.502654	0.326799	0.0137866	0.0564747
	715	ENSMUSG00000026726.10	Cubn	14.4123	1.06538	0.429	0.000388117	0.00364203		5075	ENSMUSG00000026726.10	Cubn	14.4123	1.11006	0.520336	0.000340594	0.00296456
	716	ENSMUSG00000021745.14	Ptprg	563.159	1.06513	0.243933	9.56393e-07	3.19737e-05		2935	ENSMUSG00000021745.14	Ptprg	563.159	0.521252	0.248468	0.00402618	0.0217287
	717	ENSMUSG00000039154.8	Shd	30.5082	1.06499	0.373257	0.0001552	0.00178201		10044	ENSMUSG00000039154.8	Shd	30.5082	0.175528	0.274643	0.317346	0.518725
	718	ENSMUSG00000045287.6	Rtn4rl1	679.035	1.06474	0.294253	1.56256e-05	0.000300429		11601	ENSMUSG00000045287.6	Rtn4rl1	679.035	0.382928	0.263069	0.0358286	0.115186
	719	ENSMUSG00000022679.13	Mpv17l	57.0969	1.06394	0.210934	4.56145e-08	2.64099e-06		3418	ENSMUSG00000022679.13	Mpv17l	57.0969	1.10338	0.245745	5.81273e-08	1.77833e-06
	720	ENSMUSG00000075585.3	6330403L08Rik	205.667	1.06359	0.230363	3.29061e-07	1.34776e-05		15847	ENSMUSG00000075585.3	6330403L08Rik	205.667	0.334941	0.214544	0.0430359	0.131374
	721	ENSMUSG00000001313.12	Rnd2	120.526	1.06286	0.301627	2.1422e-05	0.000389521		206	ENSMUSG00000001313.12	Rnd2	120.526	0.179132	0.24038	0.294764	0.495266
	722	ENSMUSG00000000126.11	Wnt9a	30.2159	1.06239	0.518975	0.000963554	0.00705088		14	ENSMUSG00000000126.11	Wnt9a	30.2159	0.466348	0.442804	0.0330983	0.108792
	723	ENSMUSG00000087703.1	Gm15650	4.62768	1.06204	0.70692	0.00193015	0.0119287		17999	ENSMUSG00000087703.1	Gm15650	4.62768	0.0135231	0.372988	0.930034	0.965166
	724	ENSMUSG00000045689.3	Pcdhb4	44.1705	1.06126	0.304575	2.43819e-05	0.000430325		11676	ENSMUSG00000045689.3	Pcdhb4	44.1705	0.855215	0.356778	0.000290796	0.00261709
	725	ENSMUSG00000035878.13	Hykk	58.6182	1.0608	0.292313	1.51285e-05	0.000292245		8964	ENSMUSG00000035878.13	Hykk	58.6182	0.61948	0.310349	0.00263937	0.0155578
	726	ENSMUSG00000027221.5	Chst1	156.086	1.06027	0.386031	0.000206842	0.00222731		5314	ENSMUSG00000027221.5	Chst1	156.086	0.278111	0.294001	0.129597	0.287313
	727	ENSMUSG00000042256.5	Ptchd4	13.0673	1.0602	0.608913	0.0015553	0.0101492		10967	ENSMUSG00000042256.5	Ptchd4	13.0673	1.0504	0.760253	0.00250363	0.0149403
	728	ENSMUSG00000057766.14	Ankrd29	51.9512	1.05977	0.293607	1.61683e-05	0.000309118		13665	ENSMUSG00000057766.14	Ankrd29	51.9512	1.04984	0.352358	2.72281e-05	0.000365447
	729	ENSMUSG00000036062.13	Phf24	75.6867	1.05901	0.404301	0.000285255	0.00286208		9010	ENSMUSG00000036062.13	Phf24	75.6867	1.16762	0.497969	0.000171428	0.0016885
	730	ENSMUSG00000032374.14	Plod2	160.492	1.05848	0.278989	8.56843e-06	0.000187697		7871	ENSMUSG00000032374.14	Plod2	160.492	0.855202	0.328231	0.000152052	0.0015284
	731	ENSMUSG00000000247.11	Lhx2	40.4653	1.05767	0.477245	0.000707593	0.00564693		34	ENSMUSG00000000247.11	Lhx2	40.4653	0.223246	0.323523	0.217017	0.406417
	732	ENSMUSG00000018906.14	P4ha2	85.6325	1.05748	0.270451	5.64662e-06	0.000134193		1815	ENSMUSG00000018906.14	P4ha2	85.6325	0.366931	0.246611	0.0384093	0.120854
	733	ENSMUSG00000052631.15	Sh2d6	8.97933	1.05745	0.582291	0.00142278	0.00946572		12910	ENSMUSG00000052631.15	Sh2d6	8.97933	0.243478	0.382644	0.183264	0.363774
	734	ENSMUSG00000055408.7	Hottip	4.98958	1.05737	0.84468	0.00201446	0.0123047		13329	ENSMUSG00000055408.7	Hottip	4.98958	0.672481	0.859754	0.0197513	0.0737447
	735	ENSMUSG00000028469.15	Npr2	587.386	1.05677	0.286267	1.22608e-05	0.0002477		5941	ENSMUSG00000028469.15	Npr2	587.386	0.278084	0.241489	0.109183	0.254616
	736	ENSMUSG00000050896.12	Rtn4rl2	69.3131	1.056	0.310528	3.20364e-05	0.000534062		12616	ENSMUSG00000050896.12	Rtn4rl2	69.3131	0.148624	0.24314	0.384255	0.584468
	737	ENSMUSG00000020774.9	Aspa	68.5283	1.05538	0.221681	1.72637e-07	7.78886e-06		2446	ENSMUSG00000020774.9	Aspa	68.5283	0.93455	0.262939	3.91039e-06	7.05391e-05
	738	ENSMUSG00000078190.7	Dnm3os	185.629	1.05531	0.336077	7.0851e-05	0.00098574		16075	ENSMUSG00000078190.7	Dnm3os	185.629	1.03274	0.406213	0.00011773	0.00124573
	739	ENSMUSG00000036667.14	Tcaf1	262.703	1.05494	0.227562	3.02464e-07	1.25391e-05		9178	ENSMUSG00000036667.14	Tcaf1	262.703	0.360331	0.214476	0.029684	0.100257
	740	ENSMUSG00000107838.1	Gm45769	22.6524	1.05483	0.372189	0.000166396	0.00187993		21232	ENSMUSG00000107838.1	Gm45769	22.6524	0.985654	0.442812	0.000335576	0.00292734
	741	ENSMUSG00000053049.3	Gm15413	4.29549	1.05452	0.739423	0.0020643	0.0125268		12979	ENSMUSG00000053049.3	Gm15413	4.29549	0.343569	0.526396	0.0885637	0.219982
	742	ENSMUSG00000024747.3	Aldh1a7	210.035	1.05424	0.30218	2.41929e-05	0.0004281		4123	ENSMUSG00000024747.3	Aldh1a7	210.035	0.453613	0.282691	0.0172199	0.0666614
	743	ENSMUSG00000108218.2	Olfr1372-ps1	47.1022	1.05315	0.34086	8.22741e-05	0.00110119		21327	ENSMUSG00000108218.2	Olfr1372-ps1	47.1022	0.478405	0.318791	0.0171686	0.066506
	744	ENSMUSG00000004098.7	Col5a3	1407.17	1.05207	0.392039	0.000246883	0.00255742		617	ENSMUSG00000004098.7	Col5a3	1407.17	0.118356	0.269179	0.493214	0.682665
	745	ENSMUSG00000028862.6	Map3k6	585.154	1.05182	0.165197	2.78268e-11	4.94544e-09		6152	ENSMUSG00000028862.6	Map3k6	585.154	0.622174	0.181398	3.43021e-05	0.000441836
	746	ENSMUSG00000039081.10	Zfp503	428.567	1.05126	0.284189	1.19846e-05	0.000243966		10019	ENSMUSG00000039081.10	Zfp503	428.567	0.137512	0.227656	0.411248	0.609019
	747	ENSMUSG00000035936.6	Aldh5a1	85.2686	1.05097	0.239964	9.05478e-07	3.06393e-05		8977	ENSMUSG00000035936.6	Aldh5a1	85.2686	0.221273	0.213088	0.177088	0.35633
	748	ENSMUSG00000086266.1	Igf2os	7.219	1.05069	0.653443	0.00186855	0.011636		17543	ENSMUSG00000086266.1	Igf2os	7.219	0.042284	0.354866	0.790267	0.887039
	749	ENSMUSG00000026620.11	Mark1	430.848	1.05059	0.218029	1.32238e-07	6.31468e-06		5019	ENSMUSG00000026620.11	Mark1	430.848	0.370113	0.207918	0.0232044	0.0831203
	750	ENSMUSG00000059146.12	Ntrk3	16.5714	1.04942	0.505209	0.000951066	0.00698953		13835	ENSMUSG00000059146.12	Ntrk3	16.5714	1.56255	0.64124	9.0215e-05	0.00100827
	751	ENSMUSG00000102615.1	Gm37844	55.422	1.04852	0.372953	0.000178776	0.00198902		20037	ENSMUSG00000102615.1	Gm37844	55.422	-0.0604858	0.263406	0.723402	0.84822
	752	ENSMUSG00000044433.16	Camsap3	119.774	1.04755	0.206863	4.1104e-08	2.42799e-06		11437	ENSMUSG00000044433.16	Camsap3	119.774	0.260048	0.194154	0.096587	0.2337
	753	ENSMUSG00000018796.13	Acsl1	7658.34	1.04753	0.114277	9.87488e-21	1.68186e-17		1795	ENSMUSG00000018796.13	Acsl1	7658.34	0.477873	0.120976	1.54787e-05	0.000227364
	754	ENSMUSG00000022419.16	Deptor	1267.39	1.0461	0.256212	2.96249e-06	8.14905e-05		3269	ENSMUSG00000022419.16	Deptor	1267.39	0.794464	0.296316	0.000151659	0.00152556
	755	ENSMUSG00000019558.14	Slc6a8	637.985	1.04569	0.32363	5.47188e-05	0.00081216		1895	ENSMUSG00000019558.14	Slc6a8	637.985	0.349319	0.274153	0.0575301	0.161718
	756	ENSMUSG00000033152.13	Podxl2	305.051	1.04514	0.366798	0.000162593	0.00184576		8170	ENSMUSG00000033152.13	Podxl2	305.051	-0.190674	0.269234	0.278053	0.477085
	757	ENSMUSG00000073758.10	Sh3d21	65.792	1.04474	0.265466	5.16556e-06	0.000124361		15542	ENSMUSG00000073758.10	Sh3d21	65.792	0.279102	0.232839	0.102968	0.244364
	758	ENSMUSG00000020282.18	Rhbdf1	651.151	1.044	0.240481	1.06026e-06	3.50075e-05		2179	ENSMUSG00000020282.18	Rhbdf1	651.151	0.342746	0.220569	0.0412638	0.127229
	759	ENSMUSG00000000154.16	Slc22a18	67.0151	1.04399	0.295937	2.1476e-05	0.00038981		21	ENSMUSG00000000154.16	Slc22a18	67.0151	0.316514	0.254509	0.0754484	0.196312
	760	ENSMUSG00000038777.19	Sema6c	71.0404	1.04386	0.316402	4.45467e-05	0.00069288		9924	ENSMUSG00000038777.19	Sema6c	71.0404	0.238984	0.254318	0.173172	0.35084
	761	ENSMUSG00000022629.17	Kif21a	15.8909	1.0422	0.49796	0.00094461	0.00696463		3392	ENSMUSG00000022629.17	Kif21a	15.8909	0.101843	0.309972	0.550058	0.729632
	762	ENSMUSG00000005220.10	Corin	5.6373	1.04185	0.866111	0.00210172	0.0127074		746	ENSMUSG00000005220.10	Corin	5.6373	2.15966	1.39423	0.000754844	0.00568694
	763	ENSMUSG00000042286.13	Stab1	4195.62	1.04166	0.27074	7.1307e-06	0.000162472		10977	ENSMUSG00000042286.13	Stab1	4195.62	0.260121	0.229832	0.125795	0.281557
	764	ENSMUSG00000024713.16	Pcsk5	168.536	1.04138	0.32515	5.99021e-05	0.000867053		4111	ENSMUSG00000024713.16	Pcsk5	168.536	0.385173	0.283134	0.0400277	0.124587
	765	ENSMUSG00000000440.12	Pparg	1082.57	1.0411	0.258979	3.76831e-06	9.8866e-05		72	ENSMUSG00000000440.12	Pparg	1082.57	0.362293	0.235168	0.0367147	0.117064
	766	ENSMUSG00000027938.11	Creb3l4	15.1215	1.04097	0.525927	0.00116583	0.0081433		5659	ENSMUSG00000027938.11	Creb3l4	15.1215	1.07902	0.64955	0.00122788	0.00848078
	767	ENSMUSG00000027102.4	Hoxd8	62.2247	1.04096	0.296407	2.26748e-05	0.000406516		5264	ENSMUSG00000027102.4	Hoxd8	62.2247	0.539152	0.296913	0.00650662	0.0316095
	768	ENSMUSG00000085207.1	Gm11767	13.474	1.04096	0.443934	0.000564641	0.00480307		17229	ENSMUSG00000085207.1	Gm11767	13.474	0.0470568	0.292102	0.781347	0.882472
	769	ENSMUSG00000070280.13	Slc22a14	37.0355	1.0395	0.569181	0.00149785	0.0098529		15078	ENSMUSG00000070280.13	Slc22a14	37.0355	0.765303	0.619952	0.006899	0.0331634
	770	ENSMUSG00000090235.1	Gm16244	17.9963	1.03895	0.458572	0.000673785	0.00545163		18268	ENSMUSG00000090235.1	Gm16244	17.9963	0.246751	0.325234	0.178148	0.357459
	771	ENSMUSG00000045377.5	Tmem88	102.295	1.03893	0.271487	7.68708e-06	0.000172837		11620	ENSMUSG00000045377.5	Tmem88	102.295	0.467945	0.262579	0.0113845	0.0488361
	772	ENSMUSG00000087413.1	Gm11266	8.87393	1.03854	0.63369	0.00190482	0.0118115		17906	ENSMUSG00000087413.1	Gm11266	8.87393	0.880335	0.737078	0.00540169	0.0273904
	773	ENSMUSG00000108955.1	Gm44775	47.8331	1.03743	0.290484	1.8661e-05	0.000349582		21507	ENSMUSG00000108955.1	Gm44775	47.8331	-3.22352	0.522057	6.07155e-11	3.37057e-09
	774	ENSMUSG00000114780.1	AI197445	2.96025	1.03736	1.05748	0.00154563	0.0100957		22725	ENSMUSG00000114780.1	AI197445	2.96025	2.00369	1.74468	0.0021136	0.0130576
	775	ENSMUSG00000033327.18	Tnxb	36.62	1.03733	0.355999	0.000138271	0.00163344		8219	ENSMUSG00000033327.18	Tnxb	36.62	0.71783	0.387839	0.00223324	0.0136506
	776	ENSMUSG00000032554.15	Trf	12582.7	1.03548	0.248413	2.12512e-06	6.2404e-05		7972	ENSMUSG00000032554.15	Trf	12582.7	0.214954	0.213235	0.189758	0.372507
	777	ENSMUSG00000030796.17	Tead2	182.539	1.03547	0.21499	1.32639e-07	6.31903e-06		7099	ENSMUSG00000030796.17	Tead2	182.539	0.669309	0.238818	0.000206134	0.00196885
	778	ENSMUSG00000048807.2	Slc35e4	322.478	1.03504	0.232366	6.59807e-07	2.39098e-05		12270	ENSMUSG00000048807.2	Slc35e4	322.478	0.324322	0.213355	0.0493121	0.144849
	779	ENSMUSG00000028399.18	Ptprd	1653.91	1.03393	0.285761	1.5969e-05	0.000305881		5893	ENSMUSG00000028399.18	Ptprd	1653.91	0.647021	0.30588	0.00167658	0.0109149
	780	ENSMUSG00000027820.12	Mme	1419.92	1.03181	0.229903	5.70948e-07	2.11013e-05		5605	ENSMUSG00000027820.12	Mme	1419.92	0.921091	0.272148	7.88323e-06	0.000128131
	781	ENSMUSG00000022150.16	Dab2	1543.47	1.03159	0.283007	1.45842e-05	0.000283353		3135	ENSMUSG00000022150.16	Dab2	1543.47	0.505413	0.276549	0.0079974	0.0371427
	782	ENSMUSG00000031503.13	Col4a2	3557.19	1.03041	0.277926	1.17613e-05	0.000240137		7397	ENSMUSG00000031503.13	Col4a2	3557.19	0.131768	0.223186	0.427682	0.624221
	783	ENSMUSG00000026890.19	Lhx6	30.2649	1.02934	0.628193	0.00197757	0.0121299		5176	ENSMUSG00000026890.19	Lhx6	30.2649	0.978684	0.774042	0.00374229	0.0205292
	784	ENSMUSG00000032702.16	Kank1	209.552	1.02816	0.346089	0.000119677	0.00146202		8038	ENSMUSG00000032702.16	Kank1	209.552	0.0713445	0.249544	0.67506	0.816915
	785	ENSMUSG00000021678.9	F2rl1	44.4429	1.02792	0.328749	7.63239e-05	0.00104202		2897	ENSMUSG00000021678.9	F2rl1	44.4429	1.36319	0.380282	2.74691e-06	5.2178e-05
	786	ENSMUSG00000029095.17	Ablim2	52.9339	1.02702	0.386772	0.000278971	0.002817		6287	ENSMUSG00000029095.17	Ablim2	52.9339	0.206835	0.281028	0.244481	0.437876
	787	ENSMUSG00000022197.16	Pdzd2	616.656	1.02636	0.209592	9.04653e-08	4.69272e-06		3155	ENSMUSG00000022197.16	Pdzd2	616.656	0.352455	0.199107	0.0266813	0.092566
	788	ENSMUSG00000049929.7	Lpar4	25.2067	1.0261	0.371324	0.000211364	0.00226526		12462	ENSMUSG00000049929.7	Lpar4	25.2067	1.03901	0.442818	0.000210982	0.00200544
	789	ENSMUSG00000085563.2	2210411M09Rik	4.26351	1.02573	1.05216	0.00161065	0.0104041		17331	ENSMUSG00000085563.2	2210411M09Rik	4.26351	5.64832	1.17418	1.55388e-07	4.22873e-06
	790	ENSMUSG00000025277.14	Abhd6	77.8533	1.02486	0.220072	2.71906e-07	1.15637e-05		4409	ENSMUSG00000025277.14	Abhd6	77.8533	0.307765	0.206566	0.0576189	0.161871
	791	ENSMUSG00000041120.6	Nbl1	105.652	1.02359	0.281978	1.54121e-05	0.000297163		10669	ENSMUSG00000041120.6	Nbl1	105.652	0.471104	0.270162	0.0119455	0.0506635
	792	ENSMUSG00000058396.7	Gpr182	757.41	1.02357	0.235203	1.00947e-06	3.34384e-05		13742	ENSMUSG00000058396.7	Gpr182	757.41	0.431644	0.226593	0.0117381	0.04996
	793	ENSMUSG00000059027.14	9630013D21Rik	77.2939	1.02282	0.194209	1.46338e-08	1.03441e-06		13823	ENSMUSG00000059027.14	9630013D21Rik	77.2939	-0.134771	0.187543	0.378909	0.579839
	794	ENSMUSG00000015850.11	Adamtsl4	389.934	1.02236	0.198532	2.64306e-08	1.69338e-06		1495	ENSMUSG00000015850.11	Adamtsl4	389.934	0.39027	0.193992	0.0127482	0.0532445
	795	ENSMUSG00000008575.17	Nfib	814.676	1.02147	0.237331	1.22832e-06	3.93486e-05		1074	ENSMUSG00000008575.17	Nfib	814.676	0.778909	0.272286	9.02623e-05	0.00100832
	796	ENSMUSG00000040003.18	Magi2	137.658	1.02121	0.273056	1.05274e-05	0.000222502		10318	ENSMUSG00000040003.18	Magi2	137.658	0.299847	0.236553	0.0824925	0.209365
	797	ENSMUSG00000022306.9	Zfpm2	44.01	1.02098	0.501186	0.00112132	0.00788628		3212	ENSMUSG00000022306.9	Zfpm2	44.01	0.366005	0.386163	0.067987	0.182894
	798	ENSMUSG00000104605.1	Gm42922	17.7566	1.02066	0.461446	0.000793901	0.00612523		20520	ENSMUSG00000104605.1	Gm42922	17.7566	-0.268976	0.356946	0.149526	0.317683
	799	ENSMUSG00000034258.4	Flvcr2	27.9662	1.02042	0.348304	0.000135822	0.0016111		8483	ENSMUSG00000034258.4	Flvcr2	27.9662	0.864313	0.401505	0.00057562	0.00458963
	800	ENSMUSG00000038600.12	Atp6v0a4	5.45518	1.02014	0.740724	0.00243774	0.0141985		9856	ENSMUSG00000038600.12	Atp6v0a4	5.45518	0.501884	0.646144	0.0358933	0.115347
	801	ENSMUSG00000073633.9	Fbxo36	55.0021	1.01999	0.246259	2.35213e-06	6.74235e-05		15516	ENSMUSG00000073633.9	Fbxo36	55.0021	0.620015	0.265124	0.00111215	0.00780453
	802	ENSMUSG00000026153.15	Fam135a	199.099	1.01883	0.252376	3.53278e-06	9.42597e-05		4782	ENSMUSG00000026153.15	Fam135a	199.099	0.673131	0.27666	0.000611565	0.00480495
	803	ENSMUSG00000029287.14	Tgfbr3	1979.36	1.01779	0.23171	8.49931e-07	2.9097e-05		6386	ENSMUSG00000029287.14	Tgfbr3	1979.36	0.585188	0.243993	0.00120662	0.00836323
	804	ENSMUSG00000005397.8	Nid1	2477.57	1.01677	0.245231	2.31111e-06	6.65274e-05		769	ENSMUSG00000005397.8	Nid1	2477.57	0.366829	0.225241	0.0309203	0.103463
	805	ENSMUSG00000087475.3	4933406I18Rik	16.846	1.01624	0.409177	0.000435784	0.00396728		17924	ENSMUSG00000087475.3	4933406I18Rik	16.846	0.214861	0.296819	0.230773	0.42309
	806	ENSMUSG00000001333.9	Sync	26.1394	1.01621	0.465102	0.000850242	0.00643602		208	ENSMUSG00000001333.9	Sync	26.1394	0.0523243	0.292891	0.757713	0.869313
	807	ENSMUSG00000105044.1	Gm10416	6.7751	1.01543	0.691056	0.00240742	0.014066		20611	ENSMUSG00000105044.1	Gm10416	6.7751	0.799036	0.774167	0.00907759	0.0408531
	808	ENSMUSG00000007989.7	Fzd3	58.6135	1.01488	0.301519	3.70769e-05	0.000601412		1043	ENSMUSG00000007989.7	Fzd3	58.6135	1.0828	0.357902	2.22603e-05	0.000308577
	809	ENSMUSG00000045802.13	Hsf3	8.85836	1.01423	0.687945	0.00241341	0.0140809		11698	ENSMUSG00000045802.13	Hsf3	8.85836	1.70522	1.00269	0.000575906	0.00459036
	810	ENSMUSG00000026064.16	Ptp4a1	15.0003	1.01405	0.578329	0.00182557	0.0114276		4738	ENSMUSG00000026064.16	Ptp4a1	15.0003	0.754346	0.625888	0.00754185	0.0353883
	811	ENSMUSG00000039410.16	Prdm16	157.526	1.01365	0.339923	0.00011829	0.00145027		10128	ENSMUSG00000039410.16	Prdm16	157.526	0.323183	0.277691	0.0781583	0.201266
	812	ENSMUSG00000115317.1	Gm32618	11.473	1.01271	0.606652	0.00204238	0.012427		22822	ENSMUSG00000115317.1	Gm32618	11.473	0.434974	0.49471	0.0460559	0.138063
	813	ENSMUSG00000030877.11	Mfsd13b	5.72943	1.01179	0.739736	0.00253634	0.0146558		7138	ENSMUSG00000030877.11	Mfsd13b	5.72943	0.644789	0.744431	0.0187715	0.070983
	814	ENSMUSG00000070044.15	Fam149a	241.3	1.01072	0.291301	2.6559e-05	0.000458845		15068	ENSMUSG00000070044.15	Fam149a	241.3	0.377451	0.258071	0.036913	0.117525
	815	ENSMUSG00000044317.7	Gpr4	175.47	1.00961	0.211998	1.6678e-07	7.5748e-06		11412	ENSMUSG00000044317.7	Gpr4	175.47	0.399208	0.205822	0.013883	0.0568028
	816	ENSMUSG00000026011.13	Ctla4	34.1728	1.00957	0.274447	1.30921e-05	0.000260036		4711	ENSMUSG00000026011.13	Ctla4	34.1728	0.690401	0.301858	0.000832402	0.00616043
	817	ENSMUSG00000030770.15	Parva	965.225	1.00944	0.253895	4.45032e-06	0.000110652		7084	ENSMUSG00000030770.15	Parva	965.225	0.423762	0.238926	0.015953	0.062931
	818	ENSMUSG00000054594.13	Oscar	46.6674	1.009	0.560747	0.00174218	0.0110374		13207	ENSMUSG00000054594.13	Oscar	46.6674	0.289351	0.386537	0.127743	0.284623
	819	ENSMUSG00000074457.10	S100a16	389.775	1.00849	0.231813	1.00782e-06	3.3438e-05		15661	ENSMUSG00000074457.10	S100a16	389.775	0.453546	0.226373	0.00816466	0.0377203
	820	ENSMUSG00000022389.15	Tef	2261.56	1.00776	0.225465	6.09274e-07	2.21967e-05		3255	ENSMUSG00000022389.15	Tef	2261.56	0.611231	0.240823	0.000682136	0.00524079
	821	ENSMUSG00000029166.14	Mapre3	256.362	1.00704	0.219831	3.75771e-07	1.50884e-05		6327	ENSMUSG00000029166.14	Mapre3	256.362	0.366263	0.207854	0.0246327	0.086959
	822	ENSMUSG00000028957.12	Per3	1253.48	1.00665	0.219235	3.58414e-07	1.44768e-05		6204	ENSMUSG00000028957.12	Per3	1253.48	0.573256	0.230168	0.00102674	0.00733357
	823	ENSMUSG00000030110.13	Ret	269.404	1.00533	0.332915	0.000107242	0.00135216		6759	ENSMUSG00000030110.13	Ret	269.404	0.317418	0.271833	0.0812032	0.206825
	824	ENSMUSG00000037016.11	Frem2	10.3831	1.00511	0.751217	0.00262208	0.0149944		9294	ENSMUSG00000037016.11	Frem2	10.3831	0.904975	0.914828	0.00778183	0.0362697
	825	ENSMUSG00000009378.4	Slc16a12	54.4173	1.00394	0.332315	0.000107033	0.00135201		1120	ENSMUSG00000009378.4	Slc16a12	54.4173	0.467381	0.306525	0.0178014	0.0682778
	826	ENSMUSG00000027978.9	Prss12	31.4102	1.00271	0.310183	5.68678e-05	0.000833164		5680	ENSMUSG00000027978.9	Prss12	31.4102	0.242651	0.253438	0.166545	0.34145
	827	ENSMUSG00000027204.13	Fbn1	2542	1.00211	0.303557	4.59347e-05	0.000708174		5305	ENSMUSG00000027204.13	Fbn1	2542	0.207449	0.239943	0.226495	0.417879
	828	ENSMUSG00000041957.15	Pkp2	58.5139	1.00199	0.310602	5.80844e-05	0.000845533		10896	ENSMUSG00000041957.15	Pkp2	58.5139	0.226581	0.248905	0.192786	0.376668
	829	ENSMUSG00000025170.13	Rab40b	31.2654	1.00155	0.288924	2.69616e-05	0.00046423		4344	ENSMUSG00000025170.13	Rab40b	31.2654	0.403366	0.265324	0.0281509	0.0964144
	830	ENSMUSG00000039578.17	Ccser1	26.1823	1.00024	0.440624	0.000740071	0.00583099		10178	ENSMUSG00000039578.17	Ccser1	26.1823	0.578429	0.425309	0.0119195	0.0505803
	831	ENSMUSG00000100277.8	1810053B23Rik	3.64879	-1.00502	0.901149	0.0022977	0.0135763		19725	ENSMUSG00000100277.8	1810053B23Rik	3.64879	-0.621098	0.809742	0.0234809	0.0838679
	832	ENSMUSG00000032187.16	Smarca4	5616.23	-1.00882	0.153691	7.54862e-12	1.55837e-09		7769	ENSMUSG00000032187.16	Smarca4	5616.23	-1.30069	0.171101	5.39763e-16	5.31869e-14
	833	ENSMUSG00000028544.14	Slc5a9	3.06991	-1.00965	1.08001	0.0015718	0.0102218		5973	ENSMUSG00000028544.14	Slc5a9	3.06991	-2.61679	2.02971	0.0012326	0.00851087
	834	ENSMUSG00000050860.6	Phospho1	44.6398	-1.01419	0.282698	1.78804e-05	0.000335947		12612	ENSMUSG00000050860.6	Phospho1	44.6398	-0.204129	0.223119	0.221648	0.412066
	835	ENSMUSG00000101188.1	Eif4a-ps4	114.6	-1.017	0.224941	4.91246e-07	1.87315e-05		19827	ENSMUSG00000101188.1	Eif4a-ps4	114.6	-1.13897	0.268442	1.82537e-07	4.86677e-06
	836	ENSMUSG00000115312.1	Gm8518	6.12246	-1.02207	0.593015	0.00184235	0.0115115		22821	ENSMUSG00000115312.1	Gm8518	6.12246	-1.06439	0.808576	0.0028327	0.0164531
	837	ENSMUSG00000046295.13	Ankle1	648.707	-1.02339	0.34637	0.000126111	0.00152242		11782	ENSMUSG00000046295.13	Ankle1	648.707	-0.334235	0.282745	0.0708186	0.188305
	838	ENSMUSG00000097779.2	4833407H14Rik	90.2435	-1.02431	0.289275	2.08184e-05	0.000379898		19382	ENSMUSG00000097779.2	4833407H14Rik	90.2435	-0.377882	0.253861	0.0354601	0.114219
	839	ENSMUSG00000049539.3	Hist1h1a	20.021	-1.02671	0.484986	0.000945618	0.00696954		12391	ENSMUSG00000049539.3	Hist1h1a	20.021	-1.10284	0.629247	0.000937214	0.00678633
	840	ENSMUSG00000069310.4	Hist1h3c	37.0012	-1.02695	0.333703	8.83171e-05	0.00115983		15001	ENSMUSG00000069310.4	Hist1h3c	37.0012	-0.84324	0.390588	0.000606738	0.00477496
	841	ENSMUSG00000028378.6	Ptgr1	345.058	-1.02824	0.159106	1.48793e-11	2.84209e-09		5880	ENSMUSG00000028378.6	Ptgr1	345.058	-0.672849	0.176353	5.07622e-06	8.87269e-05
	842	ENSMUSG00000069601.14	Ank3	238.664	-1.03924	0.235629	7.94827e-07	2.75801e-05		15014	ENSMUSG00000069601.14	Ank3	238.664	-1.00192	0.282533	3.56376e-06	6.53329e-05
	843	ENSMUSG00000086593.2	Gm16548	19.2748	-1.04132	0.405413	0.000335833	0.00326236		17644	ENSMUSG00000086593.2	Gm16548	19.2748	-1.15833	0.528602	0.00026815	0.00245034
	844	ENSMUSG00000034459.8	Ifit1	125.01	-1.04151	0.215476	1.22883e-07	5.94064e-06		8548	ENSMUSG00000034459.8	Ifit1	125.01	-0.888008	0.256097	6.2757e-06	0.000105362
	845	ENSMUSG00000046080.17	Clec9a	77.1427	-1.04332	0.431829	0.000478509	0.00426133		11746	ENSMUSG00000046080.17	Clec9a	77.1427	-0.277909	0.312795	0.133862	0.293934
	846	ENSMUSG00000040270.16	Bach2	950.77	-1.04534	0.350165	0.000111985	0.00139134		10399	ENSMUSG00000040270.16	Bach2	950.77	-1.60299	0.407382	7.6088e-07	1.6807e-05
	847	ENSMUSG00000081792.4	Anp32b-ps1	13.8425	-1.04832	0.459638	0.000635799	0.00524108		16599	ENSMUSG00000081792.4	Anp32b-ps1	13.8425	-0.202492	0.293658	0.255964	0.451717
	848	ENSMUSG00000083041.2	Gmfg-ps	17.7418	-1.0515	0.396504	0.000267566	0.00273237		16813	ENSMUSG00000083041.2	Gmfg-ps	17.7418	-0.814668	0.456466	0.00179071	0.0114828
	849	ENSMUSG00000037263.13	Aldh3b3	149.837	-1.05219	0.148255	2.09472e-13	7.51086e-11		9373	ENSMUSG00000037263.13	Aldh3b3	149.837	-0.834722	0.170762	1.18054e-08	4.27543e-07
	850	ENSMUSG00000023993.7	Treml1	1084.72	-1.05622	0.260388	3.27376e-06	8.85041e-05		3759	ENSMUSG00000023993.7	Treml1	1084.72	-0.936133	0.311571	3.09635e-05	0.000405457
	851	ENSMUSG00000024989.15	Cep55	354.5	-1.06295	0.195941	6.60126e-09	5.46221e-07		4261	ENSMUSG00000024989.15	Cep55	354.5	-0.551432	0.206307	0.000728204	0.00552496
	852	ENSMUSG00000104913.1	Gm6560	85.4172	-1.0655	0.307723	2.6054e-05	0.000452031		20583	ENSMUSG00000104913.1	Gm6560	85.4172	-1.24204	0.377464	7.91888e-06	0.000128357
	853	ENSMUSG00000038352.15	Arl5c	655.226	-1.06816	0.268233	4.30817e-06	0.000108303		9757	ENSMUSG00000038352.15	Arl5c	655.226	-1.59786	0.304286	2.34044e-09	9.9908e-08
	854	ENSMUSG00000082988.3	Gm5903	9.25102	-1.07022	0.617379	0.00151003	0.00991069		16804	ENSMUSG00000082988.3	Gm5903	9.25102	-0.394103	0.4529	0.0591566	0.165112
	855	ENSMUSG00000026955.13	Sapcd2	323.277	-1.07026	0.170773	5.23334e-11	8.4888e-09		5205	ENSMUSG00000026955.13	Sapcd2	323.277	-0.727839	0.193637	4.26042e-06	7.58696e-05
	856	ENSMUSG00000035561.5	Aldh1b1	156.229	-1.07067	0.196843	6.13151e-09	5.22149e-07		8881	ENSMUSG00000035561.5	Aldh1b1	156.229	-1.16916	0.233138	4.81723e-09	1.90777e-07
	857	ENSMUSG00000116864.1	Gm3320	22.269	-1.07309	0.466104	0.000566639	0.00481463		23070	ENSMUSG00000116864.1	Gm3320	22.269	-0.104671	0.283354	0.543478	0.725077
	858	ENSMUSG00000091402.7	Rd3l	2.68835	-1.07675	1.22999	0.000960245	0.00703674		18414	ENSMUSG00000091402.7	Rd3l	2.68835	-0.816468	1.36087	0.0208837	0.0768442
	859	ENSMUSG00000054203.7	Ifi205	22.648	-1.08189	0.55172	0.00104494	0.00747516		13147	ENSMUSG00000054203.7	Ifi205	22.648	-0.325778	0.387169	0.0952024	0.231225
	860	ENSMUSG00000085417.1	Gm13919	24.1963	-1.08383	0.429147	0.000336192	0.00326417		17294	ENSMUSG00000085417.1	Gm13919	24.1963	-1.63328	0.584588	3.18431e-05	0.00041468
	861	ENSMUSG00000083457.1	Cyp4b1-ps2	43.4545	-1.08883	0.503287	0.000713612	0.00568165		16882	ENSMUSG00000083457.1	Cyp4b1-ps2	43.4545	-0.283754	0.347291	0.131475	0.290368
	862	ENSMUSG00000060419.8	Rps16-ps2	189.402	-1.0923	0.281327	6.10438e-06	0.000143075		14014	ENSMUSG00000060419.8	Rps16-ps2	189.402	-1.07533	0.344332	1.59531e-05	0.000233302
	863	ENSMUSG00000022582.4	Ly6g	1261.3	-1.09233	0.253646	1.21192e-06	3.89452e-05		3373	ENSMUSG00000022582.4	Ly6g	1261.3	-0.492075	0.252774	0.00691416	0.033207
	864	ENSMUSG00000052234.2	Epx	2197.42	-1.09259	0.406539	0.000223611	0.00236763		12836	ENSMUSG00000052234.2	Epx	2197.42	-0.50125	0.373643	0.0188804	0.0713035
	865	ENSMUSG00000080776.1	Gm12174	34.098	-1.09325	0.315951	2.54294e-05	0.00044421		16408	ENSMUSG00000080776.1	Gm12174	34.098	-0.818821	0.370637	0.000574427	0.00458166
	866	ENSMUSG00000062081.6	Gm6055	33.8968	-1.0939	0.439866	0.000357819	0.00342939		14222	ENSMUSG00000062081.6	Gm6055	33.8968	-1.17747	0.564699	0.000348149	0.00301919
	867	ENSMUSG00000058927.6	Gm10053	3.19454	-1.09396	0.878184	0.00169893	0.0108314		13812	ENSMUSG00000058927.6	Gm10053	3.19454	-0.503082	0.660256	0.0362459	0.116149
	868	ENSMUSG00000032899.14	Styk1	32.1104	-1.09865	0.258707	1.53469e-06	4.75964e-05		8105	ENSMUSG00000032899.14	Styk1	32.1104	-0.874381	0.312877	7.6529e-05	0.000877708
	869	ENSMUSG00000112515.1	Gm4928	6.11048	-1.10203	0.647442	0.00138119	0.00926747		22256	ENSMUSG00000112515.1	Gm4928	6.11048	-0.739736	0.687411	0.00992581	0.0437858
	870	ENSMUSG00000061390.6	Uba52-ps	5.09161	-1.10473	0.730442	0.00159975	0.010361		14126	ENSMUSG00000061390.6	Uba52-ps	5.09161	-0.729728	0.760717	0.0124858	0.0524752
	871	ENSMUSG00000085168.2	Gm16252	10.3045	-1.10535	0.573779	0.00101498	0.00733009		17212	ENSMUSG00000085168.2	Gm16252	10.3045	-5.89113	1.23219	1.53555e-07	4.19816e-06
	872	ENSMUSG00000024774.16	Ankrd22	306.513	-1.10903	0.238105	2.72146e-07	1.15637e-05		4138	ENSMUSG00000024774.16	Ankrd22	306.513	-0.308032	0.215514	0.0629764	0.173117
	873	ENSMUSG00000045799.6	Gm9800	97.5728	-1.10976	0.278654	4.18127e-06	0.000106158		11697	ENSMUSG00000045799.6	Gm9800	97.5728	-1.44486	0.333714	1.56763e-07	4.26124e-06
	874	ENSMUSG00000022176.11	Rem2	8.19612	-1.11312	0.612104	0.00115005	0.0080551		3142	ENSMUSG00000022176.11	Rem2	8.19612	-0.288642	0.38082	0.128268	0.285404
	875	ENSMUSG00000062758.6	Gm16477	5.0563	-1.11998	0.72117	0.00146397	0.00967678		14309	ENSMUSG00000062758.6	Gm16477	5.0563	-0.30118	0.425699	0.117361	0.267914
	876	ENSMUSG00000020641.16	Rsad2	2007.32	-1.12424	0.425924	0.000232363	0.00243665		2367	ENSMUSG00000020641.16	Rsad2	2007.32	-0.4211	0.360504	0.038939	0.122066
	877	ENSMUSG00000043263.13	Ifi209	761.232	-1.12539	0.200896	2.51702e-09	2.47321e-07		11223	ENSMUSG00000043263.13	Ifi209	761.232	-0.583474	0.216475	0.000531812	0.00430271
	878	ENSMUSG00000102196.1	Gm38171	15.4231	-1.12613	0.444145	0.000294053	0.00293021		19955	ENSMUSG00000102196.1	Gm38171	15.4231	-0.460376	0.374649	0.0282116	0.0965801
	879	ENSMUSG00000000204.16	Slfn4	3818.63	-1.13218	0.232869	1.06271e-07	5.37615e-06		31	ENSMUSG00000000204.16	Slfn4	3818.63	-0.73163	0.268137	0.000178121	0.0017421
	880	ENSMUSG00000033187.8	BC016579	24.4018	-1.13332	0.352568	5.02747e-05	0.000761122		8181	ENSMUSG00000033187.8	BC016579	24.4018	-0.24679	0.260909	0.163175	0.336817
	881	ENSMUSG00000062991.9	Nrg1	117.756	-1.13389	0.272555	2.09059e-06	6.14784e-05		14338	ENSMUSG00000062991.9	Nrg1	117.756	-0.415237	0.253815	0.0215432	0.078682
	882	ENSMUSG00000114791.1	Gm47730	9.4649	-1.13837	0.643748	0.00111124	0.00784682		22728	ENSMUSG00000114791.1	Gm47730	9.4649	-3.4842	1.24144	4.90602e-05	0.000600842
	883	ENSMUSG00000031497.9	Tnfsf13b	332.002	-1.1391	0.168736	2.20684e-12	5.30627e-10		7395	ENSMUSG00000031497.9	Tnfsf13b	332.002	-0.996389	0.198416	4.0117e-09	1.60529e-07
	884	ENSMUSG00000082154.1	Gm16464	16.2127	-1.14208	0.363593	6.09263e-05	0.000876293		16665	ENSMUSG00000082154.1	Gm16464	16.2127	-1.89649	0.517689	1.95532e-06	3.88582e-05
	885	ENSMUSG00000024033.10	Rsph1	60.3204	-1.14234	0.288677	4.42734e-06	0.000110214		3776	ENSMUSG00000024033.10	Rsph1	60.3204	-1.38989	0.358248	9.25379e-07	2.00958e-05
	886	ENSMUSG00000105944.1	Gm5075	3.77304	-1.15474	0.821721	0.00134265	0.00908846		20817	ENSMUSG00000105944.1	Gm5075	3.77304	-0.741666	0.829228	0.0135257	0.055668
	887	ENSMUSG00000110744.1	Gm5171	18.5755	-1.16317	0.354618	3.91937e-05	0.000627774		21915	ENSMUSG00000110744.1	Gm5171	18.5755	-1.7567	0.475777	1.78766e-06	3.59799e-05
	888	ENSMUSG00000022471.14	Xrcc6	649.329	-1.16328	0.148458	7.6282e-16	4.7244e-13		3302	ENSMUSG00000022471.14	Xrcc6	649.329	-0.926786	0.171953	5.7649e-10	2.7598e-08
	889	ENSMUSG00000074491.9	Clec4g	43.8886	-1.16826	0.404519	0.000113058	0.00140211		15672	ENSMUSG00000074491.9	Clec4g	43.8886	-0.555397	0.390108	0.01214	0.0512858
	890	ENSMUSG00000041911.3	Dlx1	5.75011	-1.17175	0.791772	0.00122633	0.00845321		10882	ENSMUSG00000041911.3	Dlx1	5.75011	-0.732047	0.78725	0.0130448	0.0541698
	891	ENSMUSG00000116912.1	Gm5487	14.1458	-1.17282	0.477217	0.000304718	0.00301335		23082	ENSMUSG00000116912.1	Gm5487	14.1458	-0.728374	0.511409	0.00545455	0.0275747
	892	ENSMUSG00000027398.13	Il1b	599.298	-1.17532	0.233914	4.68786e-08	2.68377e-06		5415	ENSMUSG00000027398.13	Il1b	599.298	-0.800612	0.276991	7.37018e-05	0.000850646
	893	ENSMUSG00000087336.2	Gm15860	13.7065	-1.17855	0.520917	0.000442625	0.00401525		17871	ENSMUSG00000087336.2	Gm15860	13.7065	-2.5738	0.82293	1.4416e-05	0.000214219
	894	ENSMUSG00000056904.3	Gm5620	18.2859	-1.18034	0.410899	0.000114011	0.00141136		13547	ENSMUSG00000056904.3	Gm5620	18.2859	-0.125879	0.264409	0.466182	0.658587
	895	ENSMUSG00000095217.1	Hist1h2bn	9.3799	-1.18773	0.536476	0.000469733	0.00419781		18866	ENSMUSG00000095217.1	Hist1h2bn	9.3799	-0.25667	0.33461	0.164416	0.33873
	896	ENSMUSG00000101972.1	Hist1h3i	13.6519	-1.18972	0.486041	0.000295337	0.00293727		19922	ENSMUSG00000101972.1	Hist1h3i	13.6519	-0.734738	0.521282	0.00548433	0.0276957
	897	ENSMUSG00000027360.5	Hdc	1784.93	-1.19022	0.242746	8.17008e-08	4.30361e-06		5393	ENSMUSG00000027360.5	Hdc	1784.93	-1.45028	0.282003	3.80851e-09	1.53961e-07
	898	ENSMUSG00000094392.1	Gm3788	25.7185	-1.198	0.478166	0.000254918	0.00262347		18767	ENSMUSG00000094392.1	Gm3788	25.7185	-2.1376	0.638217	5.83266e-06	9.94496e-05
	899	ENSMUSG00000099764.1	Rps10-ps2	65.8957	-1.203	0.264278	3.86386e-07	1.53393e-05		19649	ENSMUSG00000099764.1	Rps10-ps2	65.8957	-1.34493	0.324674	3.22169e-07	7.99473e-06
	900	ENSMUSG00000078249.5	Hmga1b	20.4305	-1.21422	0.462504	0.000186666	0.00205443		16083	ENSMUSG00000078249.5	Hmga1b	20.4305	-0.638982	0.466238	0.00873777	0.0397264
	901	ENSMUSG00000110773.1	Gm39326	21.2577	-1.21546	0.401784	7.03134e-05	0.000980262		21921	ENSMUSG00000110773.1	Gm39326	21.2577	-1.93377	0.555045	3.60281e-06	6.5743e-05
	902	ENSMUSG00000019312.10	Grb7	22.5841	-1.22169	0.36784	3.04958e-05	0.000511299		1870	ENSMUSG00000019312.10	Grb7	22.5841	-0.491566	0.335574	0.0166626	0.0650692
	903	ENSMUSG00000059775.5	Rps26-ps1	76.1509	-1.22571	0.247005	5.78704e-08	3.19664e-06		13922	ENSMUSG00000059775.5	Rps26-ps1	76.1509	-0.561536	0.258031	0.00250963	0.0149685
	904	ENSMUSG00000046057.4	Gm15428	6.02249	-1.23228	0.639659	0.000635769	0.00524108		11741	ENSMUSG00000046057.4	Gm15428	6.02249	-0.501975	0.507112	0.0290744	0.0988328
	905	ENSMUSG00000021609.6	Slc6a3	63.2333	-1.23313	0.322144	5.95121e-06	0.000140289		2865	ENSMUSG00000021609.6	Slc6a3	63.2333	-0.666645	0.352962	0.00261224	0.0154249
	906	ENSMUSG00000059195.10	Gm12715	240.857	-1.23578	0.224038	3.38042e-09	3.07062e-07		13843	ENSMUSG00000059195.10	Gm12715	240.857	-0.678113	0.253092	0.000285965	0.00258418
	907	ENSMUSG00000100755.1	Rps23-ps1	41.2796	-1.23862	0.390601	4.4693e-05	0.00069393		19781	ENSMUSG00000100755.1	Rps23-ps1	41.2796	-7.93297	1.20287	7.99572e-13	5.69551e-11
	908	ENSMUSG00000091957.3	Rps2-ps10	32.1318	-1.24163	0.425065	8.54543e-05	0.00113558		18491	ENSMUSG00000091957.3	Rps2-ps10	32.1318	-1.8773	0.555787	5.09827e-06	8.90466e-05
	909	ENSMUSG00000055385.12	Rnf212	34.9646	-1.2424	0.634579	0.000586189	0.00494171		13326	ENSMUSG00000055385.12	Rnf212	34.9646	-0.274985	0.399252	0.143185	0.308086
	910	ENSMUSG00000029561.17	Oasl2	782.738	-1.24318	0.274566	3.95376e-07	1.56002e-05		6531	ENSMUSG00000029561.17	Oasl2	782.738	-1.39516	0.330018	2.33664e-07	6.07244e-06
	911	ENSMUSG00000021319.7	Sfrp4	1038.49	-1.25451	0.220872	1.3085e-09	1.42509e-07		2734	ENSMUSG00000021319.7	Sfrp4	1038.49	-0.965794	0.268708	3.11957e-06	5.82738e-05
	912	ENSMUSG00000038421.13	Fcrla	1073.95	-1.2552	0.361492	1.78838e-05	0.000335947		9786	ENSMUSG00000038421.13	Fcrla	1073.95	-1.68552	0.437925	1.03306e-06	2.21295e-05
	913	ENSMUSG00000112808.1	Gm4739	48.9114	-1.25707	0.348465	1.16761e-05	0.000239354		22307	ENSMUSG00000112808.1	Gm4739	48.9114	-0.996963	0.437624	0.00028119	0.00255077
	914	ENSMUSG00000038020.5	Rapgefl1	120.804	-1.26192	0.454583	0.000114367	0.00141491		9624	ENSMUSG00000038020.5	Rapgefl1	120.804	-2.77051	0.529249	4.82407e-09	1.90777e-07
	915	ENSMUSG00000025498.15	Irf7	1205.45	-1.26217	0.264206	1.26107e-07	6.0502e-06		4510	ENSMUSG00000025498.15	Irf7	1205.45	-1.67862	0.305905	6.68396e-10	3.16772e-08
	916	ENSMUSG00000020183.11	Cpm	280.443	-1.26332	0.387355	3.25055e-05	0.000539681		2127	ENSMUSG00000020183.11	Cpm	280.443	-1.5204	0.489075	1.29926e-05	0.000196208
	917	ENSMUSG00000020140.15	Lgr5	91.8082	-1.26676	0.381902	2.74794e-05	0.000471161		2103	ENSMUSG00000020140.15	Lgr5	91.8082	-1.03683	0.481741	0.000370612	0.00317098
	918	ENSMUSG00000061702.10	Tmem91	36.7319	-1.26996	0.405988	4.60663e-05	0.000709497		14169	ENSMUSG00000061702.10	Tmem91	36.7319	-0.704053	0.44095	0.00421813	0.0225129
	919	ENSMUSG00000082809.3	Gm14150	21.5607	-1.27052	0.472121	0.00013537	0.00160761		16773	ENSMUSG00000082809.3	Gm14150	21.5607	-0.254698	0.319657	0.165808	0.34047
	920	ENSMUSG00000064246.10	Chil1	2525.7	-1.27225	0.204794	5.36509e-11	8.63398e-09		14521	ENSMUSG00000064246.10	Chil1	2525.7	-0.85204	0.244347	6.59408e-06	0.000109897
	921	ENSMUSG00000084274.2	Gm12504	21.0774	-1.27489	0.370013	1.84051e-05	0.000345104		17029	ENSMUSG00000084274.2	Gm12504	21.0774	-0.376602	0.302999	0.0489083	0.143967
	922	ENSMUSG00000111952.1	Gm4489	9.84181	-1.28015	0.605677	0.000403592	0.00374161		22134	ENSMUSG00000111952.1	Gm4489	9.84181	-0.485795	0.478055	0.0308204	0.10321
	923	ENSMUSG00000021057.15	Akap5	84.4476	-1.28368	0.349082	8.69315e-06	0.000189819		2602	ENSMUSG00000021057.15	Akap5	84.4476	-0.430747	0.315553	0.0288451	0.0982564
	924	ENSMUSG00000084353.1	Gm15452	3.72856	-1.28873	0.899902	0.000777384	0.00603195		17050	ENSMUSG00000084353.1	Gm15452	3.72856	-0.26543	0.417177	0.153651	0.323657
	925	ENSMUSG00000024034.13	Tmprss3	193.714	-1.28889	0.244115	1.0221e-08	7.82387e-07		3777	ENSMUSG00000024034.13	Tmprss3	193.714	-1.31422	0.293922	7.76911e-08	2.32198e-06
	926	ENSMUSG00000066878.5	Gm10184	18.1576	-1.2924	0.385903	2.33062e-05	0.000414487		14752	ENSMUSG00000066878.5	Gm10184	18.1576	-0.391087	0.315109	0.044209	0.134107
	927	ENSMUSG00000030107.10	Usp18	128.335	-1.29298	0.243114	8.27066e-09	6.65495e-07		6756	ENSMUSG00000030107.10	Usp18	128.335	-0.50303	0.245953	0.00517318	0.0265036
	928	ENSMUSG00000040405.13	Havcr1	18.0386	-1.29672	0.369738	1.43612e-05	0.000280607		10445	ENSMUSG00000040405.13	Havcr1	18.0386	-0.929588	0.455528	0.000648511	0.00502347
	929	ENSMUSG00000103995.1	5730488B01Rik	27.4031	-1.30119	0.435458	6.0461e-05	0.000872327		20372	ENSMUSG00000103995.1	5730488B01Rik	27.4031	-0.441303	0.369075	0.0331113	0.108807
	930	ENSMUSG00000101878.1	Gm8203	78.953	-1.30988	0.338189	4.17734e-06	0.000106158		19906	ENSMUSG00000101878.1	Gm8203	78.953	-8.6548	1.20083	4.59254e-15	4.14538e-13
	931	ENSMUSG00000095865.1	Gm13237	22.3398	-1.31059	0.491378	0.000125453	0.00151716		18940	ENSMUSG00000095865.1	Gm13237	22.3398	-0.784539	0.54518	0.00433377	0.023021
	932	ENSMUSG00000082431.3	Prdx2-ps1	50.1225	-1.31248	0.475835	0.000101563	0.00130474		16720	ENSMUSG00000082431.3	Prdx2-ps1	50.1225	-0.237239	0.322821	0.192961	0.376793
	933	ENSMUSG00000048988.8	Elfn1	6.28754	-1.3158	0.768178	0.00059463	0.00499752		12299	ENSMUSG00000048988.8	Elfn1	6.28754	-0.8164	0.787352	0.00860763	0.0392673
	934	ENSMUSG00000045136.6	Tubb2b	62.1773	-1.32556	0.254154	1.26594e-08	9.15407e-07		11574	ENSMUSG00000045136.6	Tubb2b	62.1773	-1.16097	0.31568	1.92359e-06	3.84214e-05
	935	ENSMUSG00000110537.1	Gm4316	127.661	-1.32889	0.277752	1.00793e-07	5.17591e-06		21858	ENSMUSG00000110537.1	Gm4316	127.661	-0.965845	0.345585	5.95108e-05	0.00070936
	936	ENSMUSG00000051726.6	Kcnf1	74.1157	-1.33152	0.326403	1.86542e-06	5.63001e-05		12769	ENSMUSG00000051726.6	Kcnf1	74.1157	-0.714527	0.370248	0.00187069	0.0118638
	937	ENSMUSG00000034923.9	Ly6g6f	292.693	-1.35141	0.273027	4.30954e-08	2.51652e-06		8694	ENSMUSG00000034923.9	Ly6g6f	292.693	-1.18388	0.339912	4.02492e-06	7.22195e-05
	938	ENSMUSG00000091955.2	Gm9844	29.9171	-1.35182	0.281749	8.7766e-08	4.57592e-06		18490	ENSMUSG00000091955.2	Gm9844	29.9171	-1.96278	0.369426	1.43997e-09	6.42526e-08
	939	ENSMUSG00000074575.4	Kcng1	48.8619	-1.36338	0.336843	1.89593e-06	5.69839e-05		15687	ENSMUSG00000074575.4	Kcng1	48.8619	-0.548865	0.336303	0.0087385	0.0397264
	940	ENSMUSG00000085936.7	2610307P16Rik	12.2209	-1.37195	0.500939	8.70756e-05	0.0011489		17456	ENSMUSG00000085936.7	2610307P16Rik	12.2209	-1.00666	0.618521	0.00154451	0.0102199
	941	ENSMUSG00000046442.4	Ppm1e	204.68	-1.37393	0.240514	7.27788e-10	8.49973e-08		11811	ENSMUSG00000046442.4	Ppm1e	204.68	-0.851926	0.289137	4.92098e-05	0.00060205
	942	ENSMUSG00000052565.7	Hist1h1d	43.6247	-1.38604	0.312115	3.73239e-07	1.50163e-05		12900	ENSMUSG00000052565.7	Hist1h1d	43.6247	-0.476997	0.293732	0.0141635	0.057661
	943	ENSMUSG00000022126.6	Acod1	85.3347	-1.39624	0.377802	5.77374e-06	0.000136578		3124	ENSMUSG00000022126.6	Acod1	85.3347	-2.20506	0.464609	2.56403e-08	8.6377e-07
	944	ENSMUSG00000027401.9	Tgm3	44.6446	-1.39681	0.303155	1.75563e-07	7.90344e-06		5417	ENSMUSG00000027401.9	Tgm3	44.6446	-1.84517	0.381744	1.66781e-08	5.83463e-07
	945	ENSMUSG00000031766.4	Slc12a3	58.0235	-1.40686	0.414371	1.41474e-05	0.000277084		7539	ENSMUSG00000031766.4	Slc12a3	58.0235	-1.62658	0.540217	1.68159e-05	0.000243378
	946	ENSMUSG00000018698.15	Lhx1	12.3871	-1.40745	0.481704	5.02167e-05	0.000760807		1783	ENSMUSG00000018698.15	Lhx1	12.3871	-0.194566	0.289059	0.273005	0.470987
	947	ENSMUSG00000091694.9	Apol11b	891.154	-1.41243	0.562006	0.000122557	0.00148742		18458	ENSMUSG00000091694.9	Apol11b	891.154	-0.359748	0.414246	0.0741339	0.193959
	948	ENSMUSG00000027072.13	Prg3	168.032	-1.41345	0.395029	7.9311e-06	0.000177348		5249	ENSMUSG00000027072.13	Prg3	168.032	-0.924588	0.486269	0.000952829	0.00687414
	949	ENSMUSG00000114551.1	Gm6035	4.12415	-1.41852	1.10019	0.000480214	0.00427286		22674	ENSMUSG00000114551.1	Gm6035	4.12415	-0.34596	0.527464	0.0871825	0.217602
	950	ENSMUSG00000092349.1	Smim40	5.33665	-1.43853	0.99392	0.000447984	0.00404949		18552	ENSMUSG00000092349.1	Smim40	5.33665	-0.336391	0.494931	0.0921595	0.226314
	951	ENSMUSG00000112082.1	Gm35035	13.8401	-1.44357	0.427767	1.31983e-05	0.000261382		22160	ENSMUSG00000112082.1	Gm35035	13.8401	-0.490364	0.367558	0.0203891	0.0754472
	952	ENSMUSG00000050982.13	Apol10a	7.94847	-1.4484	0.850977	0.000371437	0.00352394		12637	ENSMUSG00000050982.13	Apol10a	7.94847	-0.309354	0.441488	0.110646	0.25699
	953	ENSMUSG00000087119.4	Atg4a-ps	5.51744	-1.45145	0.742132	0.0002757	0.00279229		17800	ENSMUSG00000087119.4	Atg4a-ps	5.51744	-0.921083	0.798515	0.00534943	0.0272003
	954	ENSMUSG00000063412.4	Gm10131	8.18253	-1.45273	0.59041	0.000118182	0.00144982		14397	ENSMUSG00000063412.4	Gm10131	8.18253	-0.422291	0.425359	0.045538	0.137132
	955	ENSMUSG00000032034.6	Kcnj5	289.778	-1.45663	0.247581	1.87588e-10	2.59049e-08		7702	ENSMUSG00000032034.6	Kcnj5	289.778	-0.875075	0.298865	4.83774e-05	0.000594017
	956	ENSMUSG00000023966.8	Rsph9	46.7713	-1.47003	0.325707	1.96984e-07	8.71419e-06		3745	ENSMUSG00000023966.8	Rsph9	46.7713	-1.51764	0.409434	1.76486e-06	3.56119e-05
	957	ENSMUSG00000038132.6	Rbm24	19.5317	-1.48025	0.512663	4.22687e-05	0.000665559		9666	ENSMUSG00000038132.6	Rbm24	19.5317	-1.24455	0.674176	0.000590328	0.00467381
	958	ENSMUSG00000046341.5	Gm11223	106.747	-1.48874	0.272561	1.75265e-09	1.83695e-07		11794	ENSMUSG00000046341.5	Gm11223	106.747	-0.842863	0.325492	0.000167252	0.00165426
	959	ENSMUSG00000066861.14	Oas1g	30.9454	-1.48962	0.559636	6.85245e-05	0.000960892		14749	ENSMUSG00000066861.14	Oas1g	30.9454	-1.43341	0.756396	0.000419514	0.00351937
	960	ENSMUSG00000008193.13	Spib	2023.7	-1.51067	0.375191	1.17639e-06	3.79827e-05		1053	ENSMUSG00000008193.13	Spib	2023.7	-1.92081	0.451846	2.12884e-07	5.58768e-06
	961	ENSMUSG00000096544.2	Gm4617	85.6998	-1.51784	0.352278	3.7867e-07	1.5175e-05		19012	ENSMUSG00000096544.2	Gm4617	85.6998	-1.93499	0.428232	6.84749e-08	2.06552e-06
	962	ENSMUSG00000082896.1	Gm5844	7.96476	-1.53133	0.637071	0.000100359	0.00129409		16786	ENSMUSG00000082896.1	Gm5844	7.96476	-0.32766	0.385967	0.093651	0.228726
	963	ENSMUSG00000062148.6	Ear6	480.664	-1.54002	0.425716	4.34453e-06	0.000108682		14233	ENSMUSG00000062148.6	Ear6	480.664	-0.818126	0.497671	0.00247328	0.0147965
	964	ENSMUSG00000028459.11	Cd72	729.865	-1.54022	0.323299	4.65912e-08	2.67481e-06		5932	ENSMUSG00000028459.11	Cd72	729.865	-2.48915	0.37224	4.54001e-13	3.29346e-11
	965	ENSMUSG00000116811.1	Gm16385	12.9155	-1.54231	0.511886	2.47742e-05	0.000435996		23055	ENSMUSG00000116811.1	Gm16385	12.9155	-1.13616	0.649175	0.000889001	0.00650897
	966	ENSMUSG00000092116.1	Gm10320	11.5622	-1.54582	0.456678	8.75213e-06	0.000190903		18516	ENSMUSG00000092116.1	Gm10320	11.5622	-0.781294	0.491467	0.00317214	0.0180029
	967	ENSMUSG00000100335.2	2310008N11Rik	2.68106	-1.55266	1.36642	0.000286657	0.00287473		19734	ENSMUSG00000100335.2	2310008N11Rik	2.68106	-0.993591	1.40804	0.0128559	0.0536205
	968	ENSMUSG00000041827.15	Oasl1	145.414	-1.56075	0.285512	1.18712e-09	1.31148e-07		10859	ENSMUSG00000041827.15	Oasl1	145.414	-1.8071	0.334375	9.65841e-10	4.48746e-08
	969	ENSMUSG00000095105.2	Edaradd	85.8261	-1.59205	0.301806	2.82204e-09	2.70652e-07		18849	ENSMUSG00000095105.2	Edaradd	85.8261	-1.33196	0.369538	2.55696e-06	4.90029e-05
	970	ENSMUSG00000044103.4	Il1f9	425.63	-1.61036	0.28009	1.83819e-10	2.5557e-08		11371	ENSMUSG00000044103.4	Il1f9	425.63	-0.736914	0.321226	0.000640998	0.00497187
	971	ENSMUSG00000005447.12	Pafah1b3	461.452	-1.64232	0.324396	6.50603e-09	5.40529e-07		774	ENSMUSG00000005447.12	Pafah1b3	461.452	-1.83027	0.379069	1.71837e-08	5.97614e-07
	972	ENSMUSG00000067297.5	Ifit1bl2	95.7875	-1.64697	0.164956	3.40856e-25	9.95201e-22		14796	ENSMUSG00000067297.5	Ifit1bl2	95.7875	-1.23164	0.180301	1.13582e-13	8.74949e-12
	973	ENSMUSG00000046687.6	Gm5424	5.69235	-1.64768	0.841724	0.000143316	0.00168049		11855	ENSMUSG00000046687.6	Gm5424	5.69235	-0.716817	0.693665	0.0114615	0.0490594
	974	ENSMUSG00000026576.12	Atp1b1	985.706	-1.65353	0.245654	2.88058e-13	9.65136e-11		4993	ENSMUSG00000026576.12	Atp1b1	985.706	-1.96449	0.276569	1.86656e-14	1.58785e-12
	975	ENSMUSG00000020838.12	Slc6a4	646.823	-1.66982	0.420597	7.31448e-07	2.60017e-05		2487	ENSMUSG00000020838.12	Slc6a4	646.823	-1.20407	0.541674	0.00022977	0.00216229
	976	ENSMUSG00000052776.10	Oas1a	183.49	-1.68909	0.282032	2.82839e-11	4.98333e-09		12937	ENSMUSG00000052776.10	Oas1a	183.49	-1.68896	0.323862	2.75644e-09	1.1558e-07
	977	ENSMUSG00000025089.15	Gfra1	152.114	-1.70251	0.308169	3.9717e-10	4.97998e-08		4307	ENSMUSG00000025089.15	Gfra1	152.114	-2.53469	0.357801	3.10215e-14	2.5385e-12
	978	ENSMUSG00000094777.2	Hist1h2ap	32.2196	-1.73065	0.57336	1.24008e-05	0.000248966		18813	ENSMUSG00000094777.2	Hist1h2ap	32.2196	-6.09909	1.11381	4.48328e-09	1.78194e-07
	979	ENSMUSG00000094248.1	Hist1h2ao	30.4257	-1.76025	0.511772	3.22906e-06	8.7449e-05		18749	ENSMUSG00000094248.1	Hist1h2ao	30.4257	-3.32611	0.614393	5.11613e-09	2.00511e-07
	980	ENSMUSG00000070504.9	Fcrl6	10.2845	-1.80804	0.717177	3.20148e-05	0.000534062		15127	ENSMUSG00000070504.9	Fcrl6	10.2845	-1.02736	0.771669	0.00293063	0.0168999
	981	ENSMUSG00000032936.13	Camkv	13.186	-1.81389	0.545942	3.83229e-06	9.96263e-05		8115	ENSMUSG00000032936.13	Camkv	13.186	-2.42553	0.740704	8.53496e-06	0.000136288
	982	ENSMUSG00000091650.2	Apol11a	174.87	-1.8377	0.726343	2.86899e-05	0.000487824		18454	ENSMUSG00000091650.2	Apol11a	174.87	-0.939665	0.79868	0.00489923	0.0253749
	983	ENSMUSG00000029438.9	Bcl7a	1239.39	-1.83979	0.275583	1.39407e-13	5.37583e-11		6463	ENSMUSG00000029438.9	Bcl7a	1239.39	-1.81479	0.307625	5.96873e-11	3.32128e-09
	984	ENSMUSG00000030785.8	Cox6a2	82.8782	-1.84656	0.242339	1.36909e-16	9.99334e-14		7090	ENSMUSG00000030785.8	Cox6a2	82.8782	-0.38251	0.209293	0.0194625	0.0729197
	985	ENSMUSG00000086501.1	4930597A21Rik	14.8231	-1.8808	1.12365	0.000103379	0.00131971		17615	ENSMUSG00000086501.1	4930597A21Rik	14.8231	-0.621471	0.82259	0.0238731	0.0849625
	986	ENSMUSG00000032661.9	Oas3	974.946	-1.88492	0.32767	3.97166e-11	6.59942e-09		8027	ENSMUSG00000032661.9	Oas3	974.946	-2.11425	0.368366	1.28837e-10	6.8623e-09
	987	ENSMUSG00000031786.7	Drc7	37.6259	-1.91938	0.379172	1.60064e-09	1.71277e-07		7552	ENSMUSG00000031786.7	Drc7	37.6259	-1.88485	0.445091	2.2801e-07	5.93855e-06
	988	ENSMUSG00000032690.16	Oas2	355.731	-1.9487	0.365945	3.38636e-10	4.38041e-08		8035	ENSMUSG00000032690.16	Oas2	355.731	-2.25136	0.412374	6.71298e-10	3.17511e-08
	989	ENSMUSG00000025400.11	Tac2	35.7989	-1.9732	0.673821	7.2165e-06	0.000164244		4461	ENSMUSG00000025400.11	Tac2	35.7989	-1.21048	0.814393	0.00151014	0.0100206
	990	ENSMUSG00000030069.15	Prok2	50.4458	-2.01785	0.479352	6.51525e-08	3.54146e-06		6734	ENSMUSG00000030069.15	Prok2	50.4458	-1.09524	0.571078	0.000623572	0.00487338
	991	ENSMUSG00000071226.11	Cecr2	1204.36	-2.01919	0.357427	3.90255e-11	6.53773e-09		15227	ENSMUSG00000071226.11	Cecr2	1204.36	-1.5861	0.417284	1.24784e-06	2.61848e-05
	992	ENSMUSG00000113701.1	B230303A05Rik	42.4444	-2.072	0.473618	2.56861e-08	1.65085e-06		22500	ENSMUSG00000113701.1	B230303A05Rik	42.4444	-2.20113	0.557615	7.57891e-07	1.67822e-05
	993	ENSMUSG00000103168.1	Gm30948	75.8348	-2.07276	0.371098	4.57721e-11	7.48392e-09		20172	ENSMUSG00000103168.1	Gm30948	75.8348	-2.52285	0.42223	4.72586e-11	2.67373e-09
	994	ENSMUSG00000025867.8	Cplx2	795.758	-2.13781	0.311112	8.8431e-15	4.63424e-12		4640	ENSMUSG00000025867.8	Cplx2	795.758	-2.51229	0.338534	2.47161e-15	2.27436e-13
	995	ENSMUSG00000042757.16	Tmem108	72.9189	-2.15101	0.449513	2.73952e-09	2.65357e-07		11131	ENSMUSG00000042757.16	Tmem108	72.9189	-2.5547	0.506116	8.61398e-09	3.21588e-07
	996	ENSMUSG00000039676.4	Capsl	7.34879	-2.16233	1.19339	4.51974e-05	0.000699806		10209	ENSMUSG00000039676.4	Capsl	7.34879	-3.22624	1.71986	0.000328096	0.00287802
	997	ENSMUSG00000115249.1	Gm49085	30.8787	-2.17474	0.586218	3.10214e-07	1.28084e-05		22811	ENSMUSG00000115249.1	Gm49085	30.8787	-2.26597	0.709765	1.00043e-05	0.000156373
	998	ENSMUSG00000035692.7	Isg15	254.54	-2.19312	0.451385	1.66242e-09	1.76961e-07		8916	ENSMUSG00000035692.7	Isg15	254.54	-3.07899	0.479294	9.77287e-12	6.08207e-10
	999	ENSMUSG00000027071.14	P2rx3	36.5564	-2.20068	0.488283	9.28065e-09	7.26735e-07		5248	ENSMUSG00000027071.14	P2rx3	36.5564	-2.54819	0.560001	8.92881e-08	2.61333e-06
	1000	ENSMUSG00000028354.13	Fmn2	11.3741	-2.20897	0.693981	1.79186e-06	5.44969e-05		5870	ENSMUSG00000028354.13	Fmn2	11.3741	-2.40499	0.875911	3.76604e-05	0.000478833
	1001	ENSMUSG00000002500.15	Rpl3l	13.138	-2.31318	0.61684	1.87616e-07	8.33587e-06		400	ENSMUSG00000002500.15	Rpl3l	13.138	-0.772201	0.518218	0.00406348	0.0218701
	1002	ENSMUSG00000061086.12	Myl4	233.581	-2.4113	0.396921	9.89388e-13	2.77001e-10		14094	ENSMUSG00000061086.12	Myl4	233.581	-3.3879	0.419117	1.13596e-16	1.18345e-14
	1003	ENSMUSG00000084081.3	Gm12057	18.6959	-2.462	0.566256	1.09669e-08	8.18038e-07		16986	ENSMUSG00000084081.3	Gm12057	18.6959	-2.87446	0.650964	2.51385e-07	6.48309e-06
	1004	ENSMUSG00000043289.12	Mei4	12.6071	-2.54044	0.822594	1.19268e-06	3.83873e-05		11227	ENSMUSG00000043289.12	Mei4	12.6071	-0.647373	0.598301	0.0135193	0.0556513
	1005	ENSMUSG00000005474.9	Myl10	10.3167	-2.60945	0.793347	5.57228e-07	2.07066e-05		778	ENSMUSG00000005474.9	Myl10	10.3167	-0.81124	0.567304	0.00404892	0.0218116
	1006	ENSMUSG00000108207.2	1810059H22Rik	113.271	-2.6284	0.510951	1.72537e-10	2.41529e-08		21325	ENSMUSG00000108207.2	1810059H22Rik	113.271	-3.62648	0.535538	2.44303e-12	1.64602e-10
	1007	ENSMUSG00000046480.6	Scn4b	34.3369	-2.65516	0.567152	1.74221e-09	1.83543e-07		11818	ENSMUSG00000046480.6	Scn4b	34.3369	-2.45788	0.631332	1.1301e-06	2.40555e-05
	1008	ENSMUSG00000103320.1	Gm37403	11.4547	-2.73611	0.821312	3.9615e-07	1.56002e-05		20208	ENSMUSG00000103320.1	Gm37403	11.4547	-2.03568	0.93177	0.000152988	0.00153696
	1009	ENSMUSG00000032556.11	Bfsp2	106.331	-2.75188	0.337573	2.79232e-19	3.35702e-16		7974	ENSMUSG00000032556.11	Bfsp2	106.331	-4.29218	0.413064	9.2654e-26	1.93909e-23
	1010	ENSMUSG00000000903.3	Vpreb3	602.126	-2.80182	0.41987	1.69808e-14	8.07103e-12		136	ENSMUSG00000000903.3	Vpreb3	602.126	-3.37134	0.438288	2.39617e-15	2.21355e-13
	1011	ENSMUSG00000043243.15	Fam129c	888.269	-3.08586	0.337754	6.4206e-23	1.45805e-19		11217	ENSMUSG00000043243.15	Fam129c	888.269	-3.66119	0.358418	5.03751e-25	1.00959e-22
	1012	ENSMUSG00000034009.14	Rxfp1	3.45568	-3.12984	1.61844	7.8876e-06	0.000176762		8404	ENSMUSG00000034009.14	Rxfp1	3.45568	-0.991138	1.14709	0.00890898	0.040285
	1013	ENSMUSG00000106031.1	Gm8848	11.5634	-3.19117	0.94869	2.03716e-07	8.97316e-06		20839	ENSMUSG00000106031.1	Gm8848	11.5634	-6.16357	1.25661	7.39605e-08	2.21404e-06
	1014	ENSMUSG00000111422.1	1700027J07Rik	59.6861	-3.34487	0.476124	1.3661e-15	7.54607e-13		22031	ENSMUSG00000111422.1	1700027J07Rik	59.6861	-3.13364	0.500053	2.92222e-11	1.71483e-09
	1015	ENSMUSG00000000402.2	Egfl6	16.7124	-3.44339	0.910795	3.87585e-08	2.31622e-06		66	ENSMUSG00000000402.2	Egfl6	16.7124	-3.84676	0.914882	1.49451e-06	3.08409e-05
	1016	ENSMUSG00000105727.1	Gm8828	4.95598	-3.65136	1.79443	3.8111e-06	9.96052e-05		20765	ENSMUSG00000105727.1	Gm8828	4.95598	-4.67344	1.72162	5.51546e-05	0.000664468
	1017	ENSMUSG00000104413.1	Gm37065	18.6	-3.74224	0.730196	9.82566e-11	1.48753e-08		20479	ENSMUSG00000104413.1	Gm37065	18.6	-2.90423	0.68935	5.79581e-07	1.33853e-05
	1018	ENSMUSG00000025014.13	Dntt	437.823	-3.84045	0.255514	2.47034e-54	5.04889e-50		4273	ENSMUSG00000025014.13	Dntt	437.823	-3.35482	0.269975	4.49802e-36	1.63652e-33
	1019	ENSMUSG00000045667.14	Smtnl2	38.0149	-4.19777	0.628743	1.02907e-14	5.1298e-12		11672	ENSMUSG00000045667.14	Smtnl2	38.0149	-3.33967	0.595324	1.85904e-09	8.00811e-08
	1020	ENSMUSG00000059280.4	Vpreb2	29.3943	-4.67121	0.702187	1.76435e-14	8.19539e-12		13855	ENSMUSG00000059280.4	Vpreb2	29.3943	-5.76026	1.05808	6.7289e-09	2.57079e-07
	1021	ENSMUSG00000059305.12	Vpreb1	199.98	-4.99519	0.381519	6.35788e-42	4.33141e-38		13858	ENSMUSG00000059305.12	Vpreb1	199.98	-5.09423	0.423537	6.65203e-34	2.27991e-31
	1022	ENSMUSG00000116409.1	Gm34095	15.9473	-5.79442	1.16119	6.03849e-10	7.30265e-08		22976	ENSMUSG00000116409.1	Gm34095	15.9473	-6.64728	1.22534	3.71528e-09	1.5045e-07
	1023	ENSMUSG00000032864.4	Rag2	60.5178	-6.31723	0.799526	2.69538e-17	2.29534e-14		8092	ENSMUSG00000032864.4	Rag2	60.5178	-5.01479	0.621553	1.81479e-16	1.84992e-14
	1024	ENSMUSG00000075370.12	Igll1	412.716	-6.31797	0.423348	6.07928e-52	6.21242e-48		15821	ENSMUSG00000075370.12	Igll1	412.716	-5.29564	0.427815	8.0737e-36	2.89295e-33
	1025	ENSMUSG00000061311.6	Rag1	493.793	-6.50062	0.64304	9.30879e-26	3.17088e-22		14116	ENSMUSG00000061311.6	Rag1	493.793	-5.89923	0.68506	1.10249e-18	1.33706e-16
	1026	ENSMUSG00000041468.7	Gpr12	16.6126	-6.69761	1.05337	1.0576e-12	2.8441e-10		10761	ENSMUSG00000041468.7	Gpr12	16.6126	-6.81192	1.20294	8.56878e-10	4.0048e-08

## Sheet: Figure 5D
Adipogenesis genes
	Gene symbol	BMAd-Pnpla2+/+ AL					BMAd-Pnpla2+/+ CR					BMAd-Pnpla2-/- AL				BMAd-Pnpla2-/- CR
	Adipoq	-0.336523	-0.456746	-0.597949	-0.518876		0.303326	3.13625	0.681748	-0.340557		-0.689125	-0.562446	-0.699615		0.403378	-0.314737	-0.0081263
	Cfd	0.235219	-0.679186	-0.656621	-0.564886		1.29802	2.04027	1.78854	-0.0662084		-0.961282	-0.778233	-0.9416		-0.476946	-0.190702	-0.0463851
	Fabp4	-0.46328	-0.810246	-0.656347	-0.700137		1.18859	1.63619	2.17969	0.105867		-0.958945	-0.618566	-0.906028		-0.385985	0.131401	0.257802
	Cebpa	-0.0956048	-0.759121	-0.400633	-0.45838		1.31776	2.2926	1.67682	-0.136199		-0.799429	-0.452948	-0.774272		-0.715382	-0.457237	-0.237971
	Lpin1	-0.373365	-0.726464	-0.80465	-0.533521		1.01255	1.49427	2.37828	-0.0215282		-0.939584	-0.670977	-0.750424		-0.498211	-0.135024	0.56865
	Fzd1	-0.447816	-1.0014	-0.717856	-0.645846		0.486072	2.25483	1.81152	-0.081012		-0.929388	-0.27004	-0.949641		-0.177776	0.0495073	0.618842
	Irs1	-0.342913	-0.825764	-0.523116	-0.405291		1.07098	1.88883	2.27465	-0.0471959		-0.694077	-0.439945	-0.841936		-0.55777	-0.382188	-0.174262
	Lif	-0.346239	-0.67825	-0.67825	-0.811054		-0.279837	3.04027	0.184977	0.782596		-0.744652	-0.744652	-0.147033		-0.014229	0.450585	-0.014229
	Lifr	-0.488576	-0.662189	-0.885986	-0.811387		0.631768	1.67616	1.95149	-0.0477628		-1.18981	-0.770697	-0.815456		0.245208	0.112286	1.05495
	Lipe	0.0909372	-0.710164	-0.57788	-0.562492		0.977269	1.81211	2.29448	0.0728851		-0.843632	-0.623751	-0.825876		-0.6347	-0.362142	-0.107045
	Lpl	-0.493872	-0.67994	-0.629241	-0.826746		1.43543	1.40299	2.2578	-0.158609		-0.863959	-0.591515	-0.858923		-0.220318	-0.164327	0.39123
	Ppara	-0.700706	-0.784551	-0.449171	-0.700706		0.137746	2.23387	2.15003	-0.0299447		-0.784551	-0.616861	-0.700706		-0.11379	0.221591	0.137746
	Pparg	-0.151571	-0.910772	-0.808177	-0.645736		1.24543	1.64212	2.09012	-0.199449		-0.915901	-0.219968	-0.982588		-0.655995	0.19725	0.315234
	Ptgis	-0.462582	-0.462582	-0.808247	-0.95058		1.90624	2.24174	0.686248	0.0355832		-0.88958	-0.584581	-0.85908		0.10675	0.00508332	0.0355832
	Rora	-0.648177	-0.890293	-0.798289	-0.565858		0.659246	1.24516	2.42185	-0.260793		-1.0743	-0.449643	-0.895135		0.112065	0.363865	0.780303
	Rxrg	-0.371592	-0.521658	-0.671724	-0.721746		0.878958	2.92986	0.578826	-0.121482		-0.82179	-0.521658	-0.871812		-0.271548	0.228672	0.278694
	Scd1	-0.247954	-0.72802	-0.73663	-0.704648		0.986235	1.35085	2.50654	-0.0478836		-0.865787	-0.736484	-0.865802		-0.312584	0.018487	0.383683
	Slc2a4	-0.786421	-0.71834	-0.826242	-0.763299		1.16353	1.65808	2.01647	0.269481		-0.821104	-0.781283	-0.914876		-0.149283	0.350407	0.302879
	Lpin3	-0.449789	-0.677393	-0.904997	-0.601525		0.521322	2.16007	1.82625	0.00541915		-1.07191	-0.419442	-1.01121		-0.313227	0.445454	0.490975
	Plin1	-0.0816409	-0.710849	-0.618587	-0.63615		0.979841	2.24481	1.85797	-0.164068		-0.876172	-0.683686	-0.879684		-0.459353	-0.0186498	0.0462147
	Pnpla3	0.0919115	-0.705253	-0.642484	-0.567161		0.481078	1.42889	2.67799	0.361818		-0.805683	-0.698976	-0.780575		-0.642484	-0.14661	-0.0524568
	Cd36	-0.826166	-0.714308	-0.934086	-0.712338		1.04825	0.874556	2.39095	0.0931216		-1.0361	-0.0979043	-0.958112		-0.253088	0.297933	0.827292
	Acsl1	-0.504861	-0.64611	-0.891217	-0.744924		1.72069	1.16371	2.06966	0.389514		-0.843739	-0.887953	-0.787952		-0.152037	-0.138981	0.254201
	Me1	-0.269296	-0.74443	-0.715141	-0.604493		1.99572	0.859959	2.19586	0.0366113		-0.829043	-0.588222	-0.812771		-0.456421	-0.186311	0.11797
	Scd3	-0.43179	-0.534249	-0.739166	-0.329331		0.900173	1.20755	2.64197	-0.329331		-0.944083	-0.841625	-0.841625		0.0805032	-0.226873	0.387879
	Acaa1b	0.191225	-0.722156	-0.659165	-0.753652		1.23059	2.39594	1.45106	-0.0607421		-1.00562	-0.123734	-0.627669		-0.501685	-0.596173	-0.218222
	Acacb	-0.24998	-0.747937	-0.745599	-0.654424		1.39351	1.46832	2.25851	0.0328965		-0.839112	-0.602992	-0.750275		-0.546884	-0.371547	0.355516
	Fasn	-0.100447	-0.664853	-0.616842	-0.524428		2.42039	0.746915	1.9082	-0.0282798		-0.627166	-0.645007	-0.675077		-0.580659	-0.454968	-0.15778
	Acaca	-0.0545769	-0.711036	-0.691307	-0.635705		1.69359	0.909187	2.40745	-0.134093		-0.763649	-0.739136	-0.815066		-0.444985	-0.243503	0.222834
	Ephx2	-0.197373	-0.821984	-0.706567	-0.692988		0.624126	2.14492	1.80546	0.0606183		-1.14108	-0.645464	-1.01887		-0.149848	0.366135	0.372924
	Echdc2	-0.287155	-0.693338	-0.651679	-0.641263		1.0043	2.58737	1.35841	-0.42255		-0.932882	-0.537114	-0.787073		-0.214251	-0.0059514	0.223178
	Porcn	-0.577769	-0.73693	-0.793773	-0.464083		0.456775	2.44628	1.51974	-0.100287		-1.10073	-0.162815	-0.981355		-0.401556	0.428353	0.468143
	Plpp3	-0.47402	-0.754706	-0.806873	-0.66099		0.741054	2.17172	1.92335	-0.077459		-0.898742	-0.507721	-0.874274		-0.306901	0.0568824	0.468678
	Dgki	-0.572671	-0.205462	-0.633873	-0.664474		0.161747	3.16062	-0.0218577	-0.0524585		-0.817477	-0.236063	-0.725675		-0.236063	0.192348	0.651359

## Sheet: Figure 5E
Skeletal system development
	Gene symbol	BMAd-Pnpla2+/+ AL					BMAd-Pnpla2+/+ CR					BMAd-Pnpla2-/- AL				BMAd-Pnpla2-/- CR
	Alpl	-0.330296	-0.899518	-0.848805	-0.536251		0.495592	2.78593	1.24489	-0.275444		-0.937811	0.203737	-0.65941		-0.24957	0.110592	-0.103643
	Cdkn1c	-0.710847	-0.504744	-0.431135	-0.710847		0.696546	2.75464	1.10286	0.00462682		-1.04061	0.316727	-0.681404		-0.763845	-0.133757	0.10179
	Chrd	-0.0073015	-0.743291	-0.681958	-0.579738		1.28068	2.30289	1.62823	-0.232187		-0.825067	-0.600182	-0.722847		-0.64107	-0.150411	-0.0277456
	Col1a1	-0.14236	-0.385887	-0.698913	-0.832791		2.61646	1.84288	-0.219422	-0.4704		-0.720923	-0.375309	-0.592334		0.212865	-0.279991	0.0461154
	Col1a2	-0.113597	-0.527847	-0.85172	-0.901263		2.23446	2.04252	0.306327	-0.56053		-0.916207	-0.363713	-0.700851		0.301932	-0.120869	0.17136
	Ncan	0.106645	-0.567629	-0.374979	-0.567629		0.877245	0.540108	3.04456	0.106645		-0.712117	-0.712117	-0.663954		-0.471304	-0.326817	-0.278654
	Fbn1	-0.0557325	-0.704179	-0.587082	-0.547658		0.527987	2.50216	1.88372	-0.480577		-0.907775	-0.402904	-0.664755		-0.235791	-0.162826	-0.164592
	Fgf2	-0.42432	-0.770948	-0.842664	-0.60361		1.21917	1.1355	2.48616	-0.227101		-0.974143	-0.472131	-0.830711		-0.167338	-0.0298817	0.502013
	Fgfr1	-0.28211	-0.810008	-0.73244	-0.584484		0.737775	2.45578	1.7081	-0.188022		-0.903378	-0.450176	-0.807854		-0.367579	-0.002719	0.227114
	Fgfr2	-0.573809	-0.840817	-0.683689	-0.727641		0.751343	2.08089	1.93475	-0.271639		-1.0364	-0.277133	-0.882571		-0.191427	0.234908	0.483236
	Fgfr3	-0.523314	-0.705754	-0.753764	-0.388885		0.196843	2.63577	1.64676	-0.484906		-0.96501	-0.18244	-0.633738		-0.302466	0.153634	0.307267
	Ccn2	-0.551756	-0.185849	-0.644566	-0.719241		0.847864	2.82568	1.01535	0.247265		-0.918729	-0.0418331	-0.796049		-0.568824	-0.248789	-0.260524
	Fst	-0.408857	-0.899085	-0.79637	-0.362169		0.170079	2.03761	2.10765	-0.105382		-1.01581	-0.618955	-0.660974		-0.334155	0.0767024	0.80971
	Gli2	-0.111532	-0.579965	-0.931289	-0.560447		0.278829	2.81617	1.43039	-0.501892		-0.736109	-0.111532	-0.755627		-0.170086	-0.0920136	0.0250946
	Hoxa11	0.0759123	-0.858393	-0.69489	-0.706569		1.27883	1.94452	2.02628	-0.169343		-0.519708	-0.0175182	-0.566423		-0.799999	-0.508029	-0.484671
	Hoxd8	-0.68243	-0.838033	-0.993637	-0.557948		0.406791	2.64747	1.12256	0.0333435		-0.962516	0.157826	-0.806913		-0.0911389	0.686876	-0.122259
	Hspg2	-0.100592	-0.787483	-0.706286	-0.639169		0.699179	2.4651	1.73292	-0.184136		-0.877833	-0.475366	-0.781382		-0.46199	-0.0689104	0.185946
	Ccn1	-0.715297	-0.205897	-0.812326	-0.834562		0.323717	1.2556	2.44622	0.0508245		-1.02458	-0.646569	-0.828497		-0.313033	0.252967	1.05143
	Lox	-0.208235	-0.694635	-0.793572	-0.800306		0.776997	1.76119	2.22428	-0.202537		-0.935504	-0.687901	-0.915302		-0.216523	0.209271	0.482774
	Mmp2	-0.490387	-1.05477	-0.529311	-0.952973		0.731197	2.00967	1.70727	-0.493382		-1.01735	-0.247867	-0.825724		-0.143074	0.460233	0.846469
	Nfib	-0.464506	-0.839728	-0.904184	-0.586511		0.230691	2.02393	1.88121	-0.23661		-1.13208	-0.471412	-0.878862		0.131706	0.396433	0.849923
	Pcsk5	-0.176867	-0.72509	-0.752502	-0.578898		0.79166	2.27186	1.83328	-0.533212		-1.06316	-0.377882	-0.834735		-0.23169	0.106381	0.270848
	Pitx1	-0.106006	-0.745695	-0.626286	-0.413056		0.98573	2.58069	1.51454	-0.0974764		-0.79687	-0.259531	-0.762753		-0.651874	-0.182768	-0.438644
	Pth1r	-0.187209	-0.804006	-0.620634	-0.583589		0.433293	2.7912	1.40943	-0.172391		-0.894766	-0.209436	-0.681758		-0.511351	0.131377	-0.100154
	Prrx2	-0.565665	-0.343628	-0.787701	-1.08375		1.13662	2.61686	0.988591	0.174457		-0.565665	-0.269616	-0.935725		-0.41764	0.322482	-0.269616
	Sfrp2	-0.601716	-0.829393	-0.479121	-0.706798		-0.286472	2.5157	1.78013	-0.444094		-0.916961	0.0462859	-0.461608		-0.286472	0.133854	0.536666
	Six1	-0.153222	-0.875872	-0.681642	-0.66736		0.458032	1.95189	2.16612	-0.207492		-0.990125	-0.36459	-0.870159		-0.470274	0.0324397	0.672257
	Tgfb3	-0.178269	-0.739245	-0.762142	-0.710623		0.451397	2.39191	1.81377	0.233876		-1.09415	-0.292754	-0.739245		-0.367169	-0.229787	0.222428
	Thpo	0.0253849	-1.12963	-0.507698	-0.330004		0.913857	1.35809	2.51311	0.203079		-0.77424	-0.685393	-0.863087		-0.685393	-0.152309	0.114232
	Trp63	-0.397189	-0.64372	-0.588935	-0.780681		1.87637	1.98594	1.4381	0.0136962		-0.753289	-0.698504	-0.698504		-0.616327	-0.123265	-0.0136962
	Vdr	-0.301328	-0.784861	-0.784861	-0.681247		0.784156	2.96006	0.606532	0.192074		-0.824333	-0.483886	-0.700983		-0.123703	0.0489877	0.0933939
	Wnt5a	-0.516846	-0.818339	-0.75804	-0.742966		0.734351	1.88003	2.03077	-0.049531		-1.04446	-0.456547	-1.02938		0.0409169	0.131365	0.59868
	Pcgf2	-0.590836	-0.781271	-0.732442	-0.600602		0.815452	2.4903	1.65044	0.0244147		-0.849632	-0.268562	-0.742208		-0.419933	-0.122074	0.126957
	Irx5	-0.581519	-1.06612	-0.355372	-0.581519		1.17919	2.08377	1.79302	-0.452292		-0.726898	0.129226	-0.791511		-0.775358	-0.177686	0.323066
	Smad9	-0.477251	-0.929645	-0.720848	-0.54685		0.705934	2.48071	1.64552	-0.303253		-0.894845	-0.790447	-0.338053		0.0795418	-0.164055	0.25354
	Lrrc17	-0.350279	-0.706927	-0.760424	-0.528603		0.452179	2.44941	1.8966	-0.261117		-0.867419	-0.136291	-0.778257		-0.510771	0.113363	-0.0114637
	Slc9b2	-0.204131	-0.164439	-0.647361	-0.640746		-0.356285	3.16309	0.424329	0.0340219		-0.753207	-0.726746	-0.746592		0.278791	0.159714	0.17956
	Hoxc11	-0.689208	-1.5611	-0.863586	-0.166074		0.938319	2.04271	1.69396	-0.340452		-0.80546	-0.282326	-0.572956		-0.0498223	0.35706	0.298934
	Fgfrl1	-0.200821	-0.876243	-0.67113	-0.642124		1.12102	2.22738	1.73221	-0.153169		-0.849309	-0.524029	-0.901105		-0.488808	0.027082	0.199045
	Wnt9a	-0.274998	-0.651625	-0.526083	-1.02825		1.52444	1.52444	1.73368	-0.484235		-1.23749	-0.56793	-0.693473		-0.40054	0.227172	0.854884
	Npr2	-0.143153	-0.901624	-0.716159	-0.403358		0.643	2.03538	2.17378	-0.126544		-1.05664	-0.298169	-0.824116		-0.533461	-0.0047454	0.155807
	Adamts12	-0.275599	-0.68246	-0.655336	-0.729927		0.755113	2.53174	1.56883	-0.336628		-0.865547	-0.641774	-0.838423		0.00920279	-0.0992933	0.2601
	Gdf6	-0.633996	-0.938157	-0.606345	-0.523393		0.886805	2.40761	1.43982	0.333786		-0.799902	-0.772251	-0.938157		-0.302185	0.250833	0.195532
	Wfikkn2	-0.534196	-0.890327	-1.15743	-0.534196		0.97936	2.22582	0.801295	1.15743		-1.24646	-0.623229	-0.623229		0.0890327	0.178065	0.178065
	Hottip	-0.660782	-0.814964	-0.660782	-0.198235		1.03522	-0.0440521	2.88541	-0.198235		-0.814964	-0.814964	-0.506599		-0.0440521	0.572677	0.264313
	Dlx1	0.48323	0.0604037	0.271817	1.5403		-1.20807	-1.20807	-0.151009	-0.996662		1.11747	1.32888	1.11747		-0.996662	-0.362422	-0.996662
	Lhx1	-0.0464027	0.116007	2.06492	0.928054		-1.34568	-1.50809	-1.18327	-0.85845		0.928054	0.440825	0.603235		-0.371221	-0.0464027	0.278416
	Sfrp4	1.08033	0.440658	1.03096	1.20698		-1.2358	-0.246241	-0.810786	-1.37962		0.39558	1.48389	0.522227		-1.0512	-0.400793	-1.03617
	Phospho1	1.25686	1.4277	1.02908	0.972137		-0.62233	-0.166768	-1.07789	-1.36262		-0.394549	-0.736221	-1.19178		0.801301	0.801301	-0.736221

## Sheet: Figure 5F
Extracellular matrix organization
	Gene symbol	BMAd-Pnpla2+/+ AL					BMAd-Pnpla2+/+ CR					BMAd-Pnpla2-/- AL				BMAd-Pnpla2-/- CR
	Ddr1	-0.234088	-0.746281	-0.766289	-0.45017		0.840317	2.06078	2.07878	-0.0500188		-0.974367	-0.582219	-0.838316		-0.502189	-0.0980369	0.262099
	Col15a1	0.279514	-0.834595	-0.70569	-0.74252		1.07136	2.20388	1.58698	-0.0703717		-1.07399	-0.63203	-0.954293		-0.291352	-0.125617	0.288721
	Col3a1	-0.369765	-0.373833	-0.755285	-0.623765		0.281505	2.93088	1.17457	-0.348523		-1.01923	-0.294741	-0.604783		0.188401	0.0645653	-0.249997
	Col4a1	0.110937	-0.653285	-0.615999	-0.562733		0.984212	2.35734	1.79749	-0.282107		-0.879243	-0.552641	-0.773553		-0.506664	-0.262483	-0.161279
	Col4a2	0.0378212	-0.592872	-0.581535	-0.595811		0.94439	2.50643	1.62127	-0.297261		-0.977082	-0.505112	-0.744457		-0.494195	-0.199424	-0.122162
	Col1a1	-0.14236	-0.385887	-0.698913	-0.832791		2.61646	1.84288	-0.219422	-0.4704		-0.720923	-0.375309	-0.592334		0.212865	-0.279991	0.0461154
	Col1a2	-0.113597	-0.527847	-0.85172	-0.901263		2.23446	2.04252	0.306327	-0.56053		-0.916207	-0.363713	-0.700851		0.301932	-0.120869	0.17136
	Eln	-0.28115	-1.07462	-0.662265	-0.624779		0.231168	2.07426	2.11175	-0.118708		-0.993398	-0.156195	-0.681009		-0.537309	0.143699	0.568548
	Ccn2	-0.551756	-0.185849	-0.644566	-0.719241		0.847864	2.82568	1.01535	0.247265		-0.918729	-0.0418331	-0.796049		-0.568824	-0.248789	-0.260524
	Hspg2	-0.100591	-0.787483	-0.706286	-0.639169		0.699179	2.4651	1.73292	-0.184136		-0.877833	-0.475366	-0.781382		-0.46199	-0.0689104	0.185946
	Ccn1	-0.715297	-0.205897	-0.812326	-0.834562		0.323717	1.2556	2.44622	0.0508245		-1.02458	-0.646569	-0.828497		-0.313033	0.252967	1.05143
	Lox	-0.208235	-0.694635	-0.793572	-0.800306		0.776997	1.76119	2.22428	-0.202537		-0.935504	-0.687901	-0.915302		-0.216523	0.209271	0.482774
	Mmp2	-0.490387	-1.05477	-0.529311	-0.952973		0.731197	2.00967	1.70727	-0.493382		-1.01735	-0.247867	-0.825724		-0.143074	0.460233	0.846469
	Nid1	-0.103916	-0.729453	-0.833113	-0.603631		0.608839	2.39537	1.79343	-0.196138		-1.02828	-0.432055	-0.82382		-0.269058	0.0226215	0.199202
	Tnfrsf11b	-0.781524	-0.58015	-0.0431516	-0.915773		0.292472	1.56784	2.70896	-0.378775		-0.714399	-0.513025	-0.513025		-0.0431516	-0.311651	0.225347
	Sfrp2	-0.601716	-0.829393	-0.479121	-0.706798		-0.286472	2.5157	1.78013	-0.444094		-0.916961	0.0462859	-0.461608		-0.286472	0.133854	0.536666
	Postn	-0.342043	-0.40469	-0.715316	-0.750555		0.37318	3.17795	0.0977931	0.182628		-0.802761	-0.592632	-0.539121		0.144779	0.228308	-0.0575199
	Col5a3	0.0490775	-1.01831	-0.362992	-0.382052		0.770652	1.57301	2.51968	-0.108852		-0.911207	-0.46737	-0.850395		-0.688835	-0.0698235	-0.0525784
	Ramp2	-0.355478	-1.11662	-0.968295	-0.593579		0.175369	2.09969	1.88111	0.14024		-0.706774	-0.230573	-0.81997		-0.648225	0.429083	0.714023
	Smoc1	-0.211369	-0.637002	-0.633425	-0.714498		0.462252	2.30428	1.87864	-0.11122		-0.989908	-0.664424	-0.952948		-0.267404	0.151075	0.385948
	Ccdc80	0.106683	-0.680261	-0.628134	-0.684038		0.674289	1.97797	2.18295	-0.134815		-0.942911	-0.682276	-0.912441		-0.508267	-0.0270349	0.258279
	Pxdn	-0.235307	-0.734906	-0.79577	-0.656289		1.08596	2.14222	1.80873	-0.0539812		-0.912428	-0.622052	-0.901016		-0.379861	-0.0844136	0.339104
	Tnxb	-0.128612	-1.11892	-0.713796	-0.848839		0.366544	2.34717	1.08677	-0.0835977		-0.803824	-0.713796	-0.713796		-0.173626	0.0964589	1.40187
	Adamts9	-0.222852	-0.748523	-0.72295	-0.62634		1.01887	2.44528	1.6241	-0.347876		-0.839449	-0.478584	-0.765571		-0.39334	0.135172	-0.0779373
	Phldb1	-0.0982576	-0.798058	-0.632772	-0.567457		0.944111	2.44368	1.61992	-0.167571		-0.955346	-0.536799	-0.772732		-0.54613	-0.059602	0.127011
	Kazald1	-0.450584	-0.792828	-0.87061	-0.746158		1.22174	2.38071	1.40064	0.0783383		-0.823941	-0.38058	-0.800606		-0.419471	-0.0772271	0.280573
	Npnt	-0.200102	-0.576346	-0.735003	-0.821131		0.194274	2.52427	1.86244	-0.177437		-0.852863	-0.367825	-0.757668		-0.222768	-0.0006476	0.130811
	Adamts18	-0.509442	-0.386473	-0.755379	-0.263504		2.31884	1.08915	1.70399	0.351339		-1.00132	-0.509442	-0.63241		-0.386473	-0.63241	-0.386473
	Adamtsl4	-0.413804	-1.12782	-0.603125	-0.597716		0.348893	2.38275	1.84724	0.30562		-0.922268	-0.37053	-0.624762		-0.197436	-0.251528	0.224482
	Adamts15	-0.417436	-0.808451	-0.681635	-0.681635		0.301188	2.15059	2.06604	-0.02642		-0.945835	-0.470276	-0.808451		-0.438572	0.438572	0.322324
	Adamts12	-0.275599	-0.68246	-0.655336	-0.729927		0.755113	2.53174	1.56883	-0.336628		-0.865547	-0.641774	-0.838423		0.00920279	-0.0992933	0.2601
	Col8a2	-0.350845	-0.62027	-0.45447	-0.57882		0.00148036	3.30712	0.219093	-0.350845		-0.66172	-0.361207	-0.45447		-0.0399697	0.229455	0.115468
	Rxfp1	2.14862	0.44594	1.0135	0.729719		-0.972959	-0.972959	-0.972959	-0.972959		0.729719	0.44594	0.44594		-0.12162	-0.972959	-0.972959
