# Supplementary material for: Lipolysis of bone marrow adipocytes is required to fuel bone and the marrow niche during energy deficits
Source: eLife. 2022 Jun 22;11:e78496. doi: 10.7554/eLife.78496 (PMC9273217; doi:10.7554/eLife.78496)
Supplement: Figure 6—figure supplement 1—source data 1. [file elife-78496-fig6-figsupp1-data1.xlsx]

## Sheet: Sheet1
Figure 6 - figure supplement 1A						Figure 6 - figure supplement 1B						Figure 6 - figure supplement 1C						Figure 6 - figure supplement 1D
Ob. N/BS	BMAd-Pnpla2+/+		BMAd-Pnpla2-/-			Oc. N/BS	BMAd-Pnpla2+/+		BMAd-Pnpla2-/-			Oc. S/BS	BMAd-Pnpla2+/+		BMAd-Pnpla2-/-			P1NP	BMAd-Pnpla2+/+		BMAd-Pnpla2-/-
	RT	CE	RT	CE			RT	CE	RT	CE			RT	CE	RT	CE			RT	CE	RT	CE
	13.5953	5.77388	9.32008	7.06587			1.99652	2.72475	4.26512	2.98337			0.147288	0.146097	0.307999	0.181636			50.369	88.506	61.237	20.108
	8.02085	3.20124	10.3063	6.2007			4.15197	4.26832	2.67803	2.41139			0.240664	0.227653	0.228933	0.174631			2.442	3.96	110.726	3.146
	9.47164	5.24745	7.54422	9.44315			2.40325	1.62852	3.02821	2.92487			0.166496	0.126536	0.178682	0.177369			60.06	73.172	56.309	2.387
	8.95539	10.4981	10.3338	7.17615			2.40267	2.5084	1.70812	1.97207			0.14626	0.15994	0.104631	0.131742			58.773	34.419	74.514	61.996
	5.07967	9.28715	10.55	11.3918			3.08409	2.05535	2.55567	3.91593			0.199746	0.123872	0.21082	0.266213			86.812	2.321	76.087	4.565
	8.66273		9.6836	8.25554			2.7647		2.07233	4.07535			0.260702		0.166761	0.256289			72.6		3.454	12.892
Two-way ANOVA
	Source of Variation	% of total variation	P value	P value summary			Source of Variation	% of total variation	P value	P value summary			Source of Variation	% of total variation	P value	P value summary			Source of Variation	% of total variation	P value	P value summary
	Interaction	0.7406	0.6808	ns			Interaction	2.344	0.5048	ns			Interaction	2.811	0.4497	ns			Interaction	9.488	0.1074	ns
	Genotype	5.227	0.2809	ns			Genotype	1.035	0.6565	ns			Genotype	5.114	0.3109	ns			Genotype	1.165	0.562	ns
	Temperature	14.59	0.0792	ns			Temperature	0.2654	0.8215	ns			Temperature	3.368	0.4087	ns			Temperature	18.42	0.029	*
Figure 6 - figure supplement 1E						Figure 6 - figure supplement 1F						Figure 6 - figure supplement 1G
Tb. BV/TV	BMAd-Pnpla2+/+		BMAd-Pnpla2-/-			Tb. BMD	BMAd-Pnpla2+/+		BMAd-Pnpla2-/-			Tb. Conn.Dens.	BMAd-Pnpla2+/+		BMAd-Pnpla2-/-
	RT	CE	RT	CE			RT	CE	RT	CE			RT	CE	RT	CE
	28.52	19.67	50.24	14.46			244.618	161.989	388.9	126.055			121.55	157.73	282.755	93.9074
	29.41	19.93	36.17	14.73			240.514	165.91	293.32	125.143			149.341	171.573	144.427	98.6297
	37.39	21.24	33.84	19.9			312.199	171.109	285.659	165.089			204.353	236.783	198.537	117.632
	33	19.43	32.95	18.45			270.976	163.083	268.878	151.044			154.21	117.994	147.22	146.712
	35.17	24.94		19.66			280.461	201.479		164.816			186.709	227.542		135.18
Two-way ANOVA
	Source of Variation	% of total variation	P value	P value summary			Source of Variation	% of total variation	P value	P value summary			Source of Variation	% of total variation	P value	P value summary
	Interaction	6.198	0.0416	*			Interaction	5.223	0.0387	*			Interaction	23.47	0.0344	*
	Genotype	0.2926	0.6353	ns			Genotype	0.2092	0.6568	ns			Genotype	3.061	0.4139	ns
	Temperature	77.35	<0.0001	****			Temperature	81.62	<0.0001	****			Temperature	8.267	0.1875	ns
Figure 6 - figure supplement 1H						Figure 6 - figure supplement 1I						Figure 6 - figure supplement 1J
Tb. Th	BMAd-Pnpla2+/+		BMAd-Pnpla2-/-			Tb. N	BMAd-Pnpla2+/+		BMAd-Pnpla2-/-			Tb. Sp	BMAd-Pnpla2+/+		BMAd-Pnpla2-/-
	RT	CE	RT	CE			RT	CE	RT	CE			RT	CE	RT	CE
	0.0645	0.0505	0.078	0.0464			4.987	5.1427	6.4651	4.6695			0.1795	0.1786	0.1444	0.2095
	0.0641	0.049	0.0695	0.0441			5.4611	5.2954	5.4635	4.7075			0.1627	0.1803	0.1614	0.2064
	0.0641	0.0467	0.0641	0.0489			6.2044	5.5292	5.9719	4.9231			0.1357	0.176	0.1459	0.191
	0.0672	0.0486	0.0685	0.0497			5.6478	4.9919	5.8472	4.9795			0.1531	0.1915	0.1535	0.1937
	0.0625	0.0495		0.049			6.3044	6.1233		5.385			0.1366	0.1488		0.1722
Two-way ANOVA
	Source of Variation	% of total variation	P value	P value summary			Source of Variation	% of total variation	P value	P value summary			Source of Variation	% of total variation	P value	P value summary
	Interaction	2.893	0.0306	*			Interaction	10.57	0.0998	ns			Interaction	5.966	0.1395	ns
	Genotype	1.165	0.1506	ns			Genotype	1.546	0.5125	ns			Genotype	3.778	0.2333	ns
	Temperature	90.87	<0.0001	****			Temperature	36.96	0.0051	**			Temperature	52.97	0.0003	***
