# Supplementary material for: Lipolysis of bone marrow adipocytes is required to fuel bone and the marrow niche during energy deficits
Source: eLife. 2022 Jun 22;11:e78496. doi: 10.7554/eLife.78496 (PMC9273217; doi:10.7554/eLife.78496)
Supplement: Figure 6—source data 1. [file elife-78496-fig6-data1.xlsx]

## Sheet: Sheet1
Figure 6B																Figure 6F																														Figure 6H
	Tb. BV/TV					Tb. BMD					Tb. BMC						BMAd-ATGL+/+																														Tb. BV/TV
	BMAd-Pnpla2+/+		BMAd-Pnpla2-/-			BMAd-Pnpla2+/+		BMAd-Pnpla2-/-			BMAd-Pnpla2+/+		BMAd-Pnpla2-/-				Bin center	BMAd-Pnpla2+/+ (RT)							BMAd-Pnpla2+/+ (CE)							Area	BMAd-Pnpla2+/+ (RT)							BMAd-Pnpla2+/+ (CE)							BMAd-Pnpla2+/+		BMAd-Pnpla2-/-
	AL	CR	AL	CR		AL	CR	AL	CR		AL	CR	AL	CR			0	0	0	0	0	0	0		0	0	0	0	0			<=650	88.2353	57.9832	75	90.6977	92.9412	89.1304		95.8333	93.75	100	100	100			RT	CE	RT
	30	10	0.5	5		478.429	296.511	210.98	284.41		0.0956857	0.0593023	0.042196	0.056882			200	8.82353	3.36134	0	2.32558	0	8.69565		16.6667	18.75	8.57143	23.5294	12.5			>650	11.7647	42.0168	25	9.30233	7.05882	10.8696		4.16667	6.25	0	0	0			19.76	30.98	18.43
	30	5	20	5		395.175	270.489	386.822	285.569		0.0790349	0.0540978	0.0773643	0.0571137			400	35.2941	20.1681	50	53.4884	41.1765	50		50	53.125	60	67.6471	62.5																		24.7	24.96	18.87
	5	25	5	10		320.945	399.894	271.588	292.867		0.0641889	0.0799788	0.0543177	0.0585735			600	32.3529	19.3277	16.6667	25.5814	36.4706	23.913		29.1667	12.5	28.5714	5.88235	25																		27.53	31.44	20.81
	5	2.5	0.1	20		265.161	274.037	212.032	355.281		0.0530322	0.0548075	0.0424063	0.0710561			800	11.7647	18.4874	16.6667	9.30233	16.4706	15.2174		0	9.375	2.85714	2.94118	0																		26.22	13.29	19.55
	25	5	5	5		391.066	279.58	301.519	282.99		0.0782132	0.0559159	0.0603038	0.056598			1000	8.82353	17.6471	8.33333	6.97674	4.70588	2.17391		4.16667	6.25	0	0	0																		16.03	21.26	34.87
	70	5	20	5		534.077	260.583	361.652	277.51		0.106815	0.0521166	0.0723305	0.055502			1200	2.94118	9.2437	0	2.32558	1.17647	0		0	0	0	0	0																		15.1		24.06
	25	2		0.5		393.247	236.981		222.137		0.0786493	0.0473962		0.0444273			1400	0	7.56303	8.33333	0	0	0		0	0	0	0	0																				18.7
		15		15			349.202		362.382			0.0698404		0.0724764			1600	0	2.52101	0	0	0	0		0	0	0	0	0																	Two-way ANOVA
		10					284.506					0.0569013					1800	0	1.68067	0	0	0	0		0	0	0	0	0																		Source of Variation	% of total variation	P value
Two-way ANOVA																																															Interaction	17.2	0.0425
	Source of Variation	% of total variation	P value	P value summary		Source of Variation	% of total variation	P value	P value summary		Source of Variation	% of total variation	P value	P value summary		Figure 6G																															Genotype	13.36	0.0704
	Interaction	10.21	0.059	ns		Interaction	12.53	0.035	*		Interaction	12.53	0.035	*			BMAd-ATGL-/-																														Temperature	3.713	0.3249
	Genotype	11.73	0.0441	*		Genotype	12.18	0.0374	*		Genotype	12.18	0.0374	*			Bin center	BMAd-Pnpla2-/- (RT)								BMAd-Pnpla2-/- (CE)						Area	BMAd-Pnpla2-/- (RT)							BMAd-Pnpla2-/- (CE)
	Diet	10.78	0.0529	ns		Diet	10.46	0.0525	ns		Diet	10.46	0.0525	ns			0	0	0	0	0	0	0	0		0	0	0	0	0		<=950	59.292	74.5455	57	81.3953	89.7959	84.8101	79.7101		49.7143	89.2857	95	76.4706	61.9048
																	200	0.884956	1.81818	1	9.30233	2.04082	0	1.44928		0	1.78571	0	1.47059	0		>950	40.708	25.4545	43	18.6047	10.2041	15.1899	20.2899		50.2857	10.7143	5	23.5294	38.0952		Tb. BMD
																	400	14.1593	21.8182	13	16.2791	24.4898	17.7215	17.3913		4.57143	30.3571	11.25	8.82353	9.52381																	BMAd-Pnpla2+/+		BMAd-Pnpla2-/-
Figure 6D																	600	10.6195	18.1818	13	25.5814	18.3673	20.2532	24.6377		8.57143	28.5714	32.5	26.4706	16.6667																	RT	CE	RT
	Ct. BV/TV					Ct. BMD					Ct. BMC						800	12.3894	21.8182	13	13.9535	26.5306	22.7848	15.942		11.4286	19.6429	28.75	25	16.6667																	173.039	255.233	132.436
	BMAd-Pnpla2+/+		BMAd-Pnpla2-/-			BMAd-Pnpla2+/+		BMAd-Pnpla2-/-			BMAd-Pnpla2+/+		BMAd-Pnpla2-/-				1000	17.6991	9.09091	14	13.9535	14.2857	17.7215	17.3913		19.4286	8.92857	18.75	14.7059	16.6667																	214.63	221.637	147.438
	AL	CR	AL	CR		AL	CR	AL	CR		AL	CR	AL	CR			1200	7.9646	7.27273	15	11.6279	6.12245	12.6582	13.0435		20	3.57143	5	11.7647	7.14286																	222.535	241.848	183.729
	48.33	20.83	23.81	24.29		536.925	400.53	391.081	418.143		0.0427018	0.0285096	0.025383	0.0253915			1400	5.30973	14.5455	12	6.97674	6.12245	3.79747	4.34783		11.4286	5.35714	3.75	5.88235	7.14286																	223.882	111.506	161.81
	55	13.33	23.33	29.17		529.341	348.237	411.087	437.535		0.0391645	0.0194221	0.0338386	0.029177			1600	6.19469	5.45455	9	2.32558	2.04082	3.79747	4.34783		8.57143	1.78571	0	4.41176	14.2857																	137.107	185.076	280.744
	29.76	11.67	35.42	9.76		445.856	289.037	473.464	307.258		0.029488	0.0158246	0.033989	0.0198707			1800	8.84956	0	5	0	0	1.26582	1.44928		10.8571	0	0	0	7.14286																	127.226		196.395
	86.67	5.76	29.76	32.14		717.495	294.872	443.944	453.262		0.0589478	0.0216445	0.0294459	0.0292313			2000	9.73451	0	3	0	0	0	0		2.85714	0	0	0	0																			167.739
	52.22	9.17	17.14	14.58		549.917	258.909	288.284	373.594		0.0391088	0.0155345	0.0176554	0.0267092			2200	1.76991	0	0	0	0	0	0		1.14286	0	0	1.47059	0																Two-way ANOVA
	63.1	20.83	38.89	47.22		581.865	376.797	490.698	533.66		0.0377144	0.0267871	0.0377316	0.0409504			2400	0.884956	0	1	0	0	0	0		0.571429	0	0	0	4.7619																	Source of Variation	% of total variation	P value
	40	20.67		16.67		463.389	386.732		350.866		0.0368512	0.0217987		0.0210519			2600	0.884956	0	1	0	0	0	0		0.571429	0	0	0	0																	Interaction	14.1	0.0661
		5.83		9.58			340.2		302.279			0.0288925		0.0214923			2800	0	0	0	0	0	0	0		0	0	0	0	0																	Genotype	15.26	0.0568
		33.33					462.053					0.0277232					3000	0.884956	0	0	0	0	0	0		0	0	0	0	0																	Temperature	3.486	0.3445
Two-way ANOVA																	3200	0.884956	0	0	0	0	0	0		0	0	0	0	0
	Source of Variation	% of total variation	P value	P value summary		Source of Variation	% of total variation	P value	P value summary		Source of Variation	% of total variation	P value	P value summary			3400	0	0	0	0	0	0	0		0	0	0	0	0
	Interaction	19.17	0.0016	**		Interaction	18.39	0.0042	**		Interaction	15.21	0.0092	**			3600	0	0	0	0	0	0	0		0	0	0	0	0
	Genotype	5.997	0.0599	ns		Genotype	4.149	0.1484	ns		Genotype	3.5	0.1884	ns			3800	0.884956	0	0	0	0	0	0		0	0	0	0	0
	Diet	33.07	<0.0001	****		Diet	27.35	0.0007	***		Diet	29.77	0.0005	***			4000	0	0	0	0	0	0	0		0	0	0	0	0
[truncated: 1 more columns]
