# Supplementary material for: Lipolysis of bone marrow adipocytes is required to fuel bone and the marrow niche during energy deficits
Source: eLife journal article supplement (doi:10.7554/elife.78496), 2022-06-22

**A**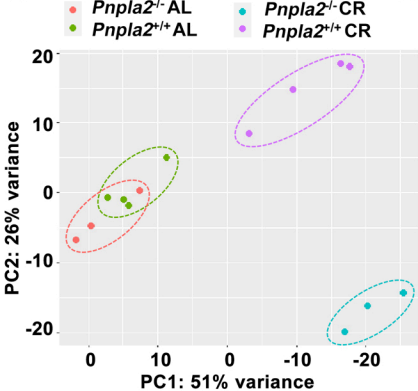**B**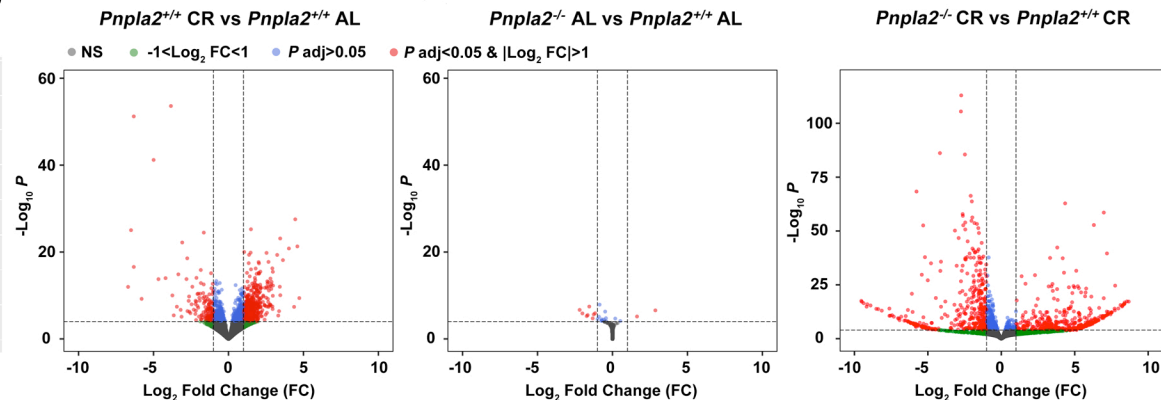**C**

## Cluster 1\_Pathway analysis

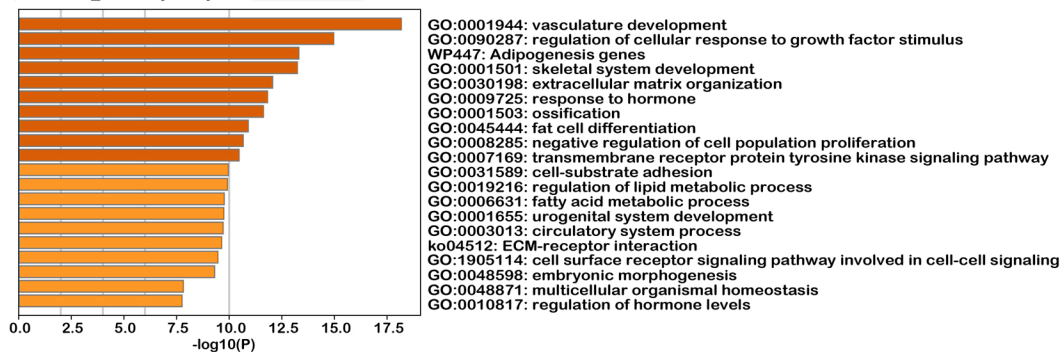**D**

## Cluster 2\_heat map

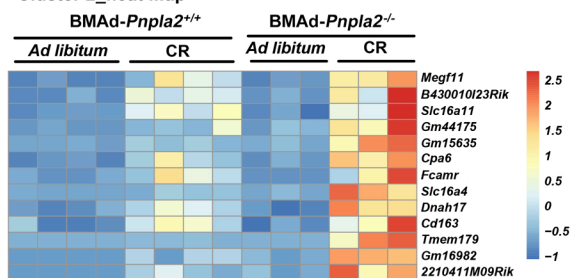**E**

## Cluster 3\_Pathway analysis

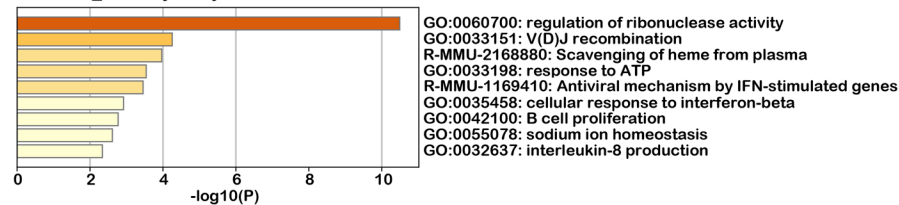**F**

## Cluster 4\_Pathway analysis

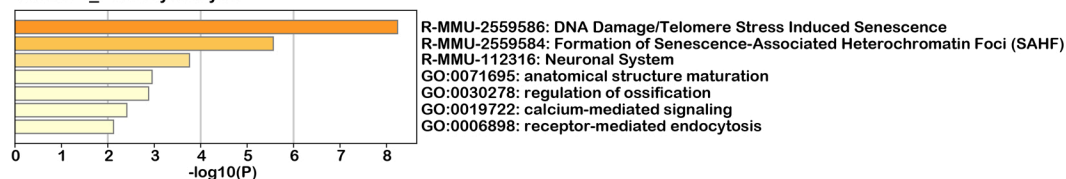

Supplement: supp [file elife_poa_e78496_Figure_5_figure_supplement_1.pdf › elife_poa_e78496_Figure_5_figure_supplement_1.pdf]
