# Supplementary material for: Lipolysis of bone marrow adipocytes is required to fuel bone and the marrow niche during energy deficits
Source: eLife journal article supplement (doi:10.7554/elife.78496), 2022-06-22

A

34% remaining genes with  $|\log_2 \text{FC}| > 1$  in *Pnpla2*<sup>-/-</sup> CR vs. *Pnpla2*<sup>-/-</sup> AL

*Pnpla2*<sup>+/-</sup> CR vs  
*Pnpla2*<sup>+/-</sup> AL

*Pnpla2*<sup>-/-</sup> CR vs  
*Pnpla2*<sup>-/-</sup> AL

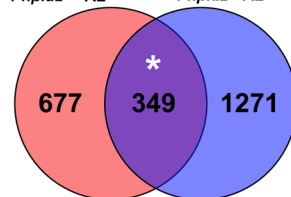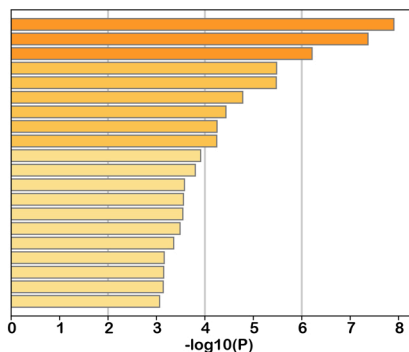

B

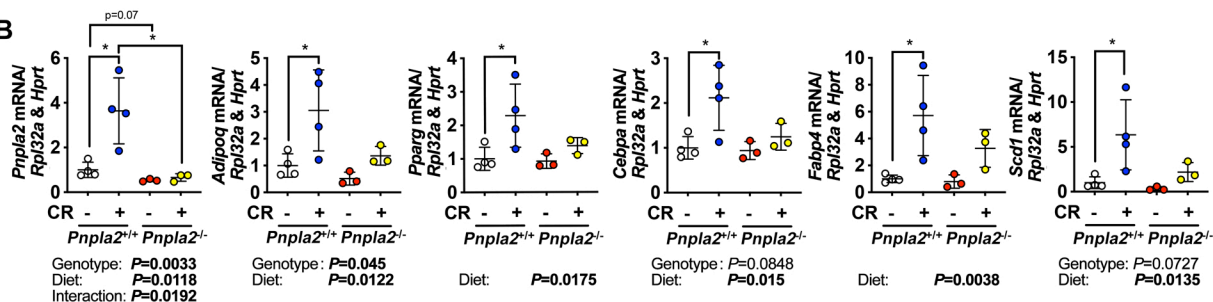

C

Fatty acid biosynthesis

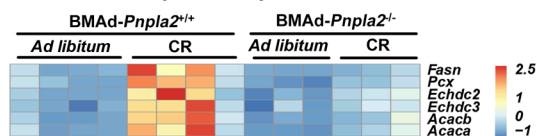

D

Myeloid leukocyte differentiation

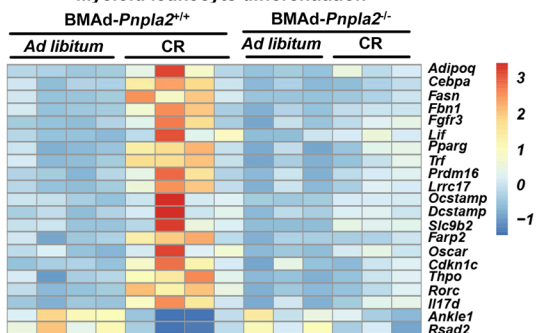

E

Collagen genes

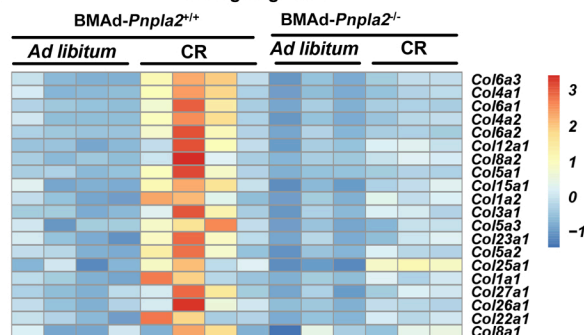

Supplement: supp [file elife_poa_e78496_Figure_5_figure_supplement_2.pdf › elife_poa_e78496_Figure_5_figure_supplement_2.pdf]
