# Supplementary material for: Lipolysis of bone marrow adipocytes is required to fuel bone and the marrow niche during energy deficits
Source: eLife journal article supplement (doi:10.7554/elife.78496), 2022-06-22

# A BMAd-*Pnpla2*<sup>-/-</sup> CR vs BMAd-*Pnpla2*<sup>+/+</sup> CR: padj<0.05 & log2 FC>1 or <-1

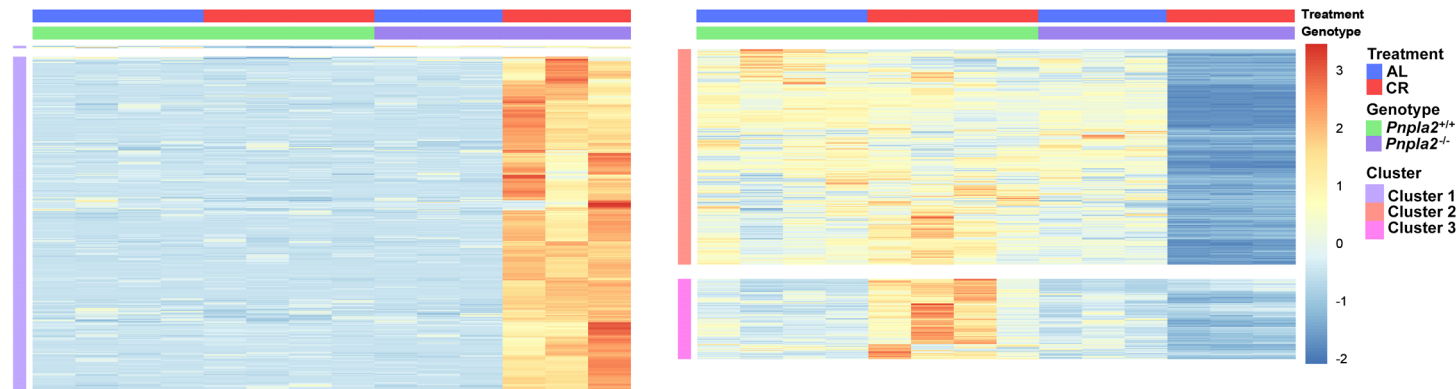

## B Cluster 2

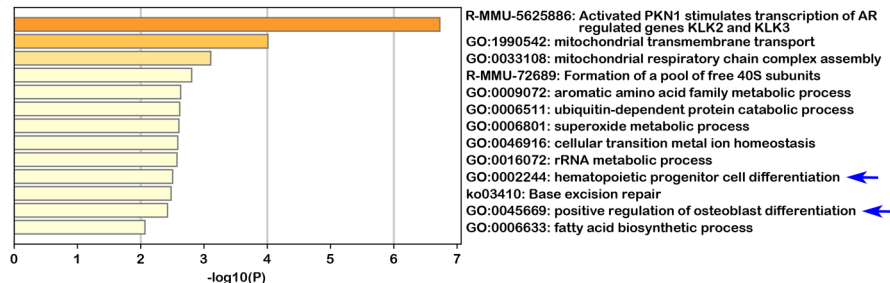

## D Cluster 3

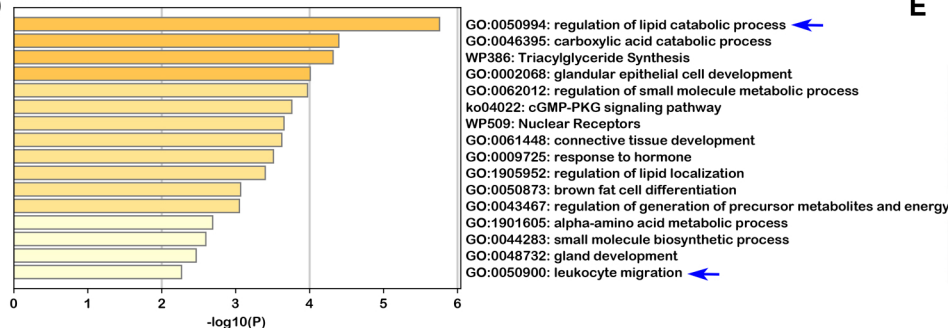

## C Hematopoietic progenitor cell differentiation

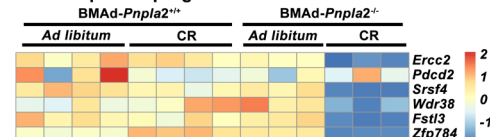

## Positive regulation of osteoblast differentiation

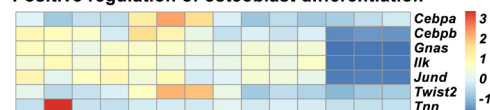

## E Regulation of lipid catabolic process

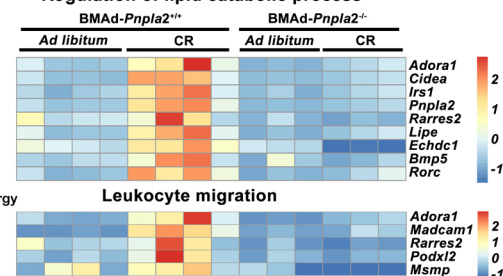

## Leukocyte migration

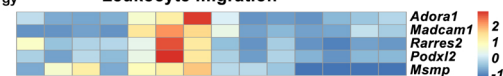

Supplement: supp [file elife_poa_e78496_Figure_5_figure_supplement_3.pdf › elife_poa_e78496_Figure_5_figure_supplement_3.pdf]
