# Supplementary material for: Lipolysis of bone marrow adipocytes is required to fuel bone and the marrow niche during energy deficits
Source: eLife journal article supplement (doi:10.7554/elife.78496), 2022-06-22
Supplement: supp [file Source data set_Figure 1_supplement 2.xlsx]

## Sheet: Sheet1
Figure 1 - figure supplement 2A
	Tissues	WT				OSX- BMAd-Cre+				OSX+BMAd-Cre+ (Heterozygous)					OSX+BMAd-Cre+ (Homozygous)
	Epididymal WAT	0.747909	0.479473	1.77262		2.38798	1.74077	1.575		1.70671	1.53449	2.17926	3.43606		2.23227	3.62056	3.6641	4.81483	3.4357
	Caudal vertebrae	1.10998	1.07171	0.818315		1.41368	1.24588	0.930043		1.03266	1.63976	1.0411	1.03825		0.87068	0.74064	0.869662	1.24842	0.553368
	DisTibia	1.26737	1.03881	0.693815		1.20595	0.77975	0.41806		0.668475	0.903528	0.596222	1.14815		0.381425	0.322331	0.648802	0.555517	0.321666
Figure 1 - figure supplement 2B					Figure 1 - figure supplement 2C					Figure 1 - figure supplement 2F
	Neg	Het	Homo			Neg	Het	Homo		Adiponectin	BMAd-Cre (neg)					BMAd-Cre (het)					BMAd-Cre (homo)
	0.887142	1.03598	0.596809			0.895761	0.938222	0.652863		HMW	0.910037	0.943943	1.40607	0.674119	1.06583	0.67015	0.354702	1.26166	0.582591	0.59751	0.295435	0.14607	0.347138	0.142724
	1.05442	0.992933	0.787911			0.871309	0.511217	0.472661		MMW	0.825296	1.00088	1.0315	1.16106	0.981264	0.950664	0.899384	1.04646	0.682982	0.912584	0.796246	0.492249	0.657652	0.592602
	1.03056	0.933197	0.85623			0.910028	0.628996	0.622834		LMW	0.752214	0.962979	1.04173	1.16504	1.07803	1.01502	0.848813	1.06471	0.955141	0.891687	0.820496	0.709561	0.74895	0.646738
	1.02788	0.88001	0.813702			1.3229	0.843519	0.383204		Total	0.96667	0.908016	1.17194	0.934057	1.01932	0.792683	0.492666	0.994165	0.581933	0.592911	0.405646	0.222182	0.42458	0.279635
Figure 1 - figure supplement 2G
	Weeks	BMAd-Cre (neg)											BMAd-Cre (het)												BMAd-Cre (homo)
	8	22.09	18.5	21.97	19.96	17.37	16.42	19.3	21.69				21.44	21.88	22.04	16.49	16.49	15.19	17.44				22.24		18.55	21.6	18.34	21.31
	9	22.9	19.31	23.28	20.96	21.14	22.44	23.87	24.13	18.3	16.85		21.89	22.25	23	20.66	20.49	19.79	21.49	15.52	16.32	20.64	24.63		19.66	21.89	22.46	22.38
	10	23.25	20.64	24.07	20.98	22.11	23.22	25.08	25.21	18.82	17.07		21.69	22.36	23.32	21.84	21.33	21.88	20.63	17.97	16.14	20.66	25.62		20.33	22.18	22.65	23.46
	11	25.27	23.3	25.68	25.14	25.37	26.74	31.19	31.68	20.06	18.34		24.1	25.47	26.5	24.84	24.45	26.95	25.63	19.22	19.26	21.53	29.13		22.62	24.62	27.44	26.32
	12	24.46	22.48	24.41	25.04	25.15	27.06	33.73	34.19	20.71	18.54		23.71	25.34	26.73	27.39	24.91	28.47	26.5	20.87	19.38	22.53	27.42		22.92	29.82	27.77	25.61
	13	25.77	24.15	25.37	26.03	26.19	28.3	35.06	35.97	20.98	19.85		24.99	25.59	26.93	29.49	25.68	31.66	29.01	20.68	19.17	24.01	27.46		24.07	33.32	28.27	26.14
	14	28.19	24.9	27	28.55	28.16	30.42	38.94	37.94	21.83	21.66		27.04	26.8	28.88	32.06	27.72	35.28	31.15	21.26	20.28	24.08	29.06		25.38	32.24	29.87	28.43
	15	26.72	24.79	26.74	28.77	29.19	30.38	41.62	40.03	22.07	21.33		27.05	26.48	29.41	34.16	27.38	36.56	31.29	21.21	21.6	24.28	29.69		24.67	32.78	29.61	27.91
	16	28.29	25.67	28.6	29.49	30.65	32.47	43.95	41.79	22	20.11		28.38	27.45	31.59	36.55	29.88	39.6	33.75	21.34	21.62	23.53	30.52		25.79	31.68	33.01	30.14
	17	29.01	25.66	28.37	30.96	31.21	31.54	44.6	42.12	22.03	20.7		28.7	27.75	33.72	35.89	29.31	40.49	34.9	21.85	20.05	23.3	29.58		25.73	33.34	34.7	29.05
	18	28.97	26.55	28.84	33.79	33.04	34.14	47.15	45.16	24	21.62		29.04	29.51	36.12	39.42	31.21	42.08	36.67	21.81	21.78	26.51	29.73		25.95	33.09	37.32	30.77
Figure 1 - figure supplement 2H
	Mins	BMAd-Cre (neg)											BMAd-Cre (het)												BMAd-Cre (homo)
	0	65	95	92	122	82	80	129	98	82	73		73	94	95	86	81	79	94	111	82	93	76		129	84	84	84
	15	252	272	382	354	373	359	324	305	326	266		317	377	256	218	336	281	443	378	182	258	121		389	301	237	365
	30	281	278	346	382	372	348	286	257	293	247		340	355	296	307	353	304	422	241	200	235	139		323	307	294	354
	60	189	165	245	266	235	242	201	223	168	163		246	269	227	279	288	263	361	157	121	136	124		246	289	263	250
	90	130	124	150	180	167	170	154	123	103	94		178	195	160	204	234	123	270	128	98	97	71		184	129	158	168
	120	95	96	106	160	114	143	144	108	95	107		118	135	125	150	199	105	185	116	92	83	74		162	89	114	130
Figure 1 - figure supplement 2I					Figure 1 - figure supplement 2J				Figure 1 - figure supplement 2K
		Body weight				sWAT				eWAT
		Neg	Het	Homo		Neg	Het	Homo		Neg	Het	Homo
		30.02	30	26.59		0.3445	0.4852	0.323		0.6308	1.0145	0.6191
		26.43	28.59	33.25		0.2541	0.4579	0.9618		0.4203	0.8747	1.6443
		29.15	36.88	35.43		0.4315	0.8656	0.6551		0.9144	2.07	1.4783
		33.52	36.15	29.88		0.6503	1.1385	0.8986		1.7197	1.963	0.977
		33.32	29.81			0.6549	0.3653			1.4168	1.0109
		32.66	42.98			0.4745	1.4882			1.5051	3.045
		45.81	35.85			1.0856	0.7432			2.7161	1.5715
		43.91	29.28			0.9811	0.6756			2.159	0.592
Figure 1 - figure supplement 2L					Figure 1 - figure supplement 2M				Figure 1 - figure supplement 2N				Figure 1 - figure supplement 2O				Figure 1 - figure supplement 2P
		Tb. BV/TV				Tb. BMD				Tb. Conn Dens.				Ct. BA/TA				Ct. BMD
		Neg	Het	Homo		Neg	Het	Homo		Neg	Het	Homo		Neg	Het	Homo		Neg	Het	Homo
		33.89	32.37	25.09		270.144	268.348	217.505		102.143	162.082	119.525		61.59	51.33	54.7		738.244	614.639	648.864
		35.76	27.16	39.55		291.524	233.853	309.04		118.494	118.462	146.199		66.13	65.85	64.71		792.321	802.741	783.607
		35.94	23.09	26.34		295.836	209.15	235.291		132.759	122.455	184.296		63.3	54.77	54.65		775.253	645.989	652.277
		24.38	29.65	27.87		219.211	251.909	237.177		120.995	165.21	123.441		56.1	61.93	57.21		670.782	750.91	684.975
		25.22	30.32			216.516	244.184			115.074	101.315			61.36	55.87			749.562	663.596
		36.76	34.56			291.793	281.732			140.228	124.239			58.95	58.71			704.558	700.965
		43.54	28.49			345.421	246.609			107.615	137.576			60.7	58.25			723.871	709.319
		32.25	27.17			265.563	236.548			115.206	155.49			60.98	60.31			735.279	736.807
