# Supplementary material for: Lipolysis of bone marrow adipocytes is required to fuel bone and the marrow niche during energy deficits
Source: eLife journal article supplement (doi:10.7554/elife.78496), 2022-06-22
Supplement: supp [file Source data set_Figure 2.xlsx]

## Sheet: Sheet1
Figure 2E				Figure 2F				Figure 2I																			Figure 2J																		Figure 2L
	Prox. Metaphysis BMAT/TV (%)				Dis. Tib BMAT/TV(%)				Area	Pnpla2+/+								Area	Pnpla2-/-									Area	Pnpla2+/+							Area	Pnpla2-/-									Glycerol
	Pnpla2 +/+	Pnpla2 -/-			Pnpla2 +/+	Pnpla2 -/-			<=500	88.0952	93.3333	75	87.5	95.6522	82.5	15.625		<=500	68.1818	76.4706	64.2105	48.2143	50	74.1935	57.5758			<=1000	94.0299	97.9021	84.0909	90.1887	67.2414	72.7273		<=1000	69.1589	52.8796	60.9756	63.9098	90.3226	69.6203	70.9091			Hours	BMAd-Pnpla2+/+ (Con)
	12.89	3.9			17.84	17.75			>500	11.9048	6.66667	25	12.5	4.34783	17.5	84.375		>500	31.8182	23.5294	35.7895	51.7857	50	25.8065	42.4242			>1000	5.97015	2.0979	15.9091	9.81132	32.7586	27.2727		>1000	30.8411	47.1204	39.0244	36.0902	9.67742	30.3797	29.0909			0	2.0755	1.8935	2.25749
	0.26	1.23			14.97	11.02																																								1	6.9895	8.0815	6.6255
	0.05	0.67			16.94	21.59				Pnpla2+/+									Pnpla2-/-										Pnpla2+/+								Pnpla2-/-									2	10.0835	14.8155	15.3615
	0.18	30.28			7.82	28.24			Bin Center	#5516	#5515	#5439	#5430	#5273	#5271	#5270		Bin Center	#5514	#5507	#5440	#5432	#5426	#5423	#5269			Bin Center	Data Set-A	Data Set-B	Data Set-C	Data Set-D	Data Set-E	Data Set-F		Bin Center	Data Set-A	Data Set-B	Data Set-C	Data Set-D	Data Set-E	Data Set-F	Data Set-G			4	35.0175	33.1975	38.2935
	0.19	21.74			9.53	24.82			30	0	0	0	0	0	0	0		30	0	0	1.05263	0	0	0	0			60	0	0	0	0.377358	0	0		50	0	0	0	0	1.07527	0	0
	0.04	19.28			13.77	18.82			40	0	2.22222	0	0	2.17391	0	0		40	0	0	0	0	0	0	0			70	0	0	0	0.754717	0	0		60	0	0	0	0	0	0	0			NEFA
	0.36	8.09			0.01	20.53			50	2.38095	4.44444	0	0	2.17391	0	0		50	0	0	3.15789	0	0	0	0			80	0	0	0	0.377358	0	0		70	0.934579	0	0	0.75188	1.07527	0	0			Hours	BMAd-Pnpla2+/+ (Con)
	10.66	15.14			26.05	4.45			60	0	2.22222	0	0	0	0	0		60	0	11.7647	2.10526	0.892857	0	0	0			90	0	0.699301	0	0.377358	0	0		80	0	0	0	0	3.22581	0	0			0	1.70516	5.31744	3.79647
	0.36	18.25			18.53	29.96			70	2.38095	6.66667	12.5	0	6.52174	0	0		70	1.51515	0	0	1.78571	0	0	0			100	4.47761	2.0979	1.51515	0.754717	0	0		90	0	0	0	3.00752	4.30108	0	1.81818			1	30.9836	14.6333	16.1543
	3.72	9.62			18.33	17.16			80	2.38095	6.66667	12.5	0	8.69565	0	0		80	0	0	2.10526	1.78571	0	0	3.0303			110	0	1.3986	0	0	0	0		100	0.934579	0	0	1.50376	0	0	1.81818			2	34.5959	23.569	51.7067
	*one broken	8.48			20.58	19.45			90	2.38095	2.22222	0	25	6.52174	10	0		90	1.51515	11.7647	0	0.892857	0	3.22581	3.0303			120	1.49254	2.0979	1.51515	0	0	0		110	1.86916	0	0	0.75188	1.07527	0	1.81818			4	90.8714	40.8699	77.3729
		17.96				22.55			100	4.7619	8.88889	0	0	0	0	0		100	0	5.88235	1.05263	1.78571	0	3.22581	0			130	2.98507	0.699301	0.757576	1.13208	1.72414	2.27273		120	0.934579	0	0.813008	0	0	1.89873	1.81818
									110	0	4.44444	0	12.5	2.17391	2.5	0		110	0	0	2.10526	0.892857	0	3.22581	0			140	1.49254	1.3986	0	0.377358	0	2.27273		130	0	0	0.813008	0	1.07527	0.632911	1.81818			Three-way ANOVA
									120	7.14286	4.44444	0	0	4.34783	2.5	0		120	1.51515	5.88235	3.15789	1.78571	5	3.22581	0			150	0	1.3986	0	0	0	0		140	0	0	0.813008	0.75188	1.07527	0.632911	0			Glycerol	Source of Variation		% of total variation
									130	2.38095	4.44444	12.5	12.5	13.0435	5	0		130	3.0303	0	1.05263	0.892857	0	6.45161	3.0303			160	0	0.699301	4.54545	0.377358	1.72414	0		150	0	0.52356	0	0	4.30108	0.632911	1.81818				Time		37.11
									140	4.7619	0	0	0	0	0	0		140	6.06061	0	1.05263	0.892857	0	0	3.0303			170	0	0.699301	2.27273	2.26415	0	2.27273		160	0	1.04712	0.813008	3.00752	3.22581	0.632911	5.45455				Genotype		5.866
									150	0	4.44444	0	0	10.8696	2.5	0		150	1.51515	5.88235	0	0.892857	0	6.45161	3.0303			180	0	2.0979	0.757576	1.13208	1.72414	0		170	0.934579	0	0.813008	1.50376	1.07527	1.26582	1.81818				Treatment		10.39
									160	4.7619	2.22222	0	12.5	2.17391	5	0		160	6.06061	11.7647	4.21053	1.78571	0	0	0			190	0	0.699301	1.51515	1.50943	1.72414	0		180	2.80374	0.52356	0	0.75188	4.30108	0	0				Time x Genotype		8.7
									170	9.52381	2.22222	0	0	0	0	1.04167		170	3.0303	0	1.05263	1.78571	5	6.45161	0			200	0	0.699301	1.51515	0.377358	0	0		190	0.934579	1.04712	0	3.00752	3.22581	0	0				Time x Treatment		10.09
									180	2.38095	2.22222	0	12.5	0	0	1.04167		180	0	0	2.10526	0.892857	0	6.45161	0			210	0	3.4965	0	1.13208	3.44828	4.54545		200	0.934579	1.04712	0.813008	2.25564	1.07527	0.632911	1.81818				Genotype x Treatment		6.35
									190	2.38095	4.44444	12.5	0	2.17391	5	1.04167		190	4.54545	0	2.10526	1.78571	0	0	0			220	2.98507	2.7972	0.757576	1.13208	0	0		210	0	0	0.813008	2.25564	2.15054	0.632911	1.81818				Time x Genotype x Treatment		5.216
									200	9.52381	0	0	0	4.34783	2.5	0		200	3.0303	0	0	2.67857	0	3.22581	3.0303			230	0	2.7972	0.757576	1.13208	0	2.27273		220	1.86916	1.04712	1.62602	1.50376	1.07527	0	0
									210	2.38095	6.66667	0	0	0	5	0		210	1.51515	0	0	0.892857	0	0	0			240	2.98507	2.0979	1.51515	2.26415	1.72414	2.27273		230	0.934579	0	1.62602	1.50376	1.07527	0	1.81818
									220	2.38095	2.22222	12.5	0	0	2.5	0		220	0	0	0	0.892857	10	0	0			250	0	2.0979	2.27273	1.13208	3.44828	0		240	0.934579	1.57068	0	0	0	1.89873	1.81818
									230	0	2.22222	0	0	4.34783	10	1.04167		230	0	5.88235	2.10526	1.78571	0	0	6.06061			260	0	1.3986	2.27273	1.13208	0	0		250	0.934579	0	0	0.75188	2.15054	1.26582	5.45455
									240	0	0	0	0	0	5	0		240	0	0	1.05263	0.892857	0	3.22581	0			270	2.98507	3.4965	2.27273	0.754717	0	0		260	0	1.04712	1.62602	0	1.07527	0	3.63636
									250	0	2.22222	0	0	0	0	1.04167		250	1.51515	5.88235	0	0	15	6.45161	6.06061			280	1.49254	0	0.757576	0.754717	1.72414	2.27273		270	0.934579	0	0.813008	0.75188	1.07527	0.632911	3.63636
									260	4.7619	0	0	0	2.17391	2.5	2.08333		260	1.51515	0	1.05263	0.892857	0	3.22581	0			290	0	0.699301	2.27273	0.377358	0	0		280	0.934579	0.52356	0	0.75188	0	0.632911	0
									270	4.7619	4.44444	0	0	2.17391	2.5	0		270	1.51515	0	0	0.892857	0	3.22581	0			300	0	1.3986	1.51515	1.13208	0	2.27273		290	0	0	0	0	1.07527	1.89873	0
									280	4.7619	0	0	0	2.17391	5	0		280	0	5.88235	3.15789	0	0	0	0			310	1.49254	2.0979	0.757576	1.88679	0	2.27273		300	1.86916	0.52356	0	0	1.07527	0.632911	3.63636
									290	0	0	0	0	6.52174	2.5	1.04167		290	1.51515	0	0	0.892857	10	0	6.06061			320	0	0.699301	0.757576	1.50943	0	0		310	0.934579	1.57068	0.813008	0.75188	0	0	1.81818
									300	0	2.22222	0	12.5	0	0	0		300	0	0	3.15789	0.892857	0	0	6.06061			330	0	2.0979	3.0303	1.50943	0	0		320	1.86916	0.52356	0.813008	0	1.07527	0.632911	0
									310	2.38095	0	0	0	6.52174	0	1.04167		310	1.51515	0	0	0.892857	0	6.45161	0			340	0	2.0979	0	1.13208	3.44828	0		330	1.86916	0	1.62602	0.75188	0	0.632911	1.81818
									320	2.38095	0	0	0	2.17391	2.5	1.04167		320	0	0	2.10526	0.892857	5	0	3.0303			350	2.98507	1.3986	0	0.377358	0	2.27273		340	0	1.04712	0	0	0	0.632911	1.81818
									330	0	2.22222	12.5	0	0	0	0		330	0	0	3.15789	1.78571	0	0	0			360	2.98507	2.0979	2.27273	1.50943	3.44828	0		350	0	1.57068	0.813008	0.75188	1.07527	0.632911	1.81818
									340	0	0	0	0	2.17391	0	0		340	3.0303	0	1.05263	1.78571	0	0	0			370	0	3.4965	0.757576	0.377358	1.72414	0		360	0	0	0	0.75188	1.07527	0.632911	0
									350	0	2.22222	0	0	0	0	0		350	1.51515	0	2.10526	1.78571	0	0	0			380	4.47761	0.699301	0.757576	2.26415	0	0		370	0	0.52356	0.813008	0	0	0	0
									360	0	2.22222	0	0	0	2.5	0		360	1.51515	0	0	0	0	0	6.06061			390	1.49254	0.699301	1.51515	0	1.72414	0		380	0	1.04712	0.813008	0.75188	1.07527	0	0
									370	0	0	0	0	0	2.5	1.04167		370	0	0	1.05263	0.892857	0	0	0			400	4.47761	4.1958	2.27273	1.50943	0	0		390	0.934579	0	0	0	0	1.89873	0
									380	0	0	0	0	0	0	0		380	1.51515	0	0	0	0	0	0			410	4.47761	0	0.757576	1.13208	0	2.27273		400	2.80374	0	2.43902	0.75188	0	1.26582	1.81818
									390	0	0	0	0	0	0	1.04167		390	3.0303	0	2.10526	0.892857	0	0	0			420	1.49254	2.7972	1.51515	1.50943	3.44828	0		410	0	1.04712	0.813008	1.50376	1.07527	0	0
									400	0	0	0	0	0	0	0		400	4.54545	0	2.10526	0	0	0	0			430	2.98507	2.0979	0.757576	1.88679	0	2.27273		420	0	0.52356	0	1.50376	2.15054	0.632911	0
									410	2.38095	0	0	0	0	0	1.04167		410	0	0	2.10526	0	0	0	3.0303			440	0	2.0979	0.757576	1.13208	0	0		430	1.86916	0	0	0.75188	0	0	1.81818
									420	0	0	0	0	0	0	0		420	3.0303	0	0	0.892857	0	0	0			450	0	2.7972	2.27273	1.13208	0	0		440	1.86916	0.52356	1.62602	0	1.07527	0.632911	0
									430	0	0	0	0	0	0	1.04167		430	0	0	2.10526	0.892857	0	3.22581	0			460	2.98507	1.3986	0.757576	1.88679	0	0		450	0	0.52356	0.813008	0	0	1.26582	1.81818
									440	0	0	0	0	0	0	1.04167		440	4.54545	0	1.05263	2.67857	0	3.22581	0			470	1.49254	1.3986	0.757576	1.13208	0	0		460	0	0.52356	0	0	0	0	0
									450	2.38095	2.22222	0	0	2.17391	0	0		450	0	5.88235	0	1.78571	0	0	0			480	1.49254	0.699301	0.757576	0.377358	0	4.54545		470	0.934579	0	1.62602	0	3.22581	1.89873	0
									460	2.38095	0	0	0	0	0	0		460	3.0303	0	1.05263	0.892857	0	0	3.0303			490	0	2.0979	0.757576	0.754717	0	4.54545		480	0	1.04712	0.813008	0.75188	0	1.89873	0
									470	0	0	0	0	0	0	0		470	1.51515	0	3.15789	0	0	0	0			500	1.49254	0.699301	1.51515	2.64151	0	0		490	0.934579	1.04712	0.813008	0	0	0.632911	1.81818
									480	0	2.22222	0	0	0	0	0		480	0	0	2.10526	0.892857	0	0	0			510	2.98507	2.7972	0.757576	1.13208	0	2.27273		500	0	0	0	1.50376	1.07527	1.89873	0
									490	0	0	0	0	0	5	0		490	0	0	2.10526	1.78571	0	3.22581	0			520	4.47761	2.0979	0.757576	0.377358	3.44828	4.54545		510	1.86916	1.04712	0.813008	0.75188	0	0	0
									500	0	0	12.5	0	0	2.5	0		500	0	0	2.10526	0	5	0	0			530	0	0	0.757576	1.88679	0	0		520	0	0	0	0	0	0	0
									510	0	0	0	0	0	0	2.08333		510	1.51515	0	2.10526	0	0	0	0			540	2.98507	0.699301	0	0	3.44828	0		530	0	0	2.43902	0.75188	1.07527	1.26582	0
									520	0	0	0	0	0	0	0		520	0	0	0	0	0	0	3.0303			550	0	0	2.27273	0.377358	1.72414	0		540	0.934579	1.04712	0.813008	0.75188	4.30108	0	0
									530	0	2.22222	0	0	0	0	0		530	0	0	0	0	0	0	3.0303			560	0	0.699301	0	1.50943	1.72414	2.27273		550	0.934579	1.04712	0.813008	1.50376	0	1.26582	0
									540	0	0	0	0	2.17391	0	0		540	0	0	0	0.892857	0	0	3.0303			570	0	0.699301	1.51515	1.13208	3.44828	0		560	0	1.57068	0	1.50376	1.07527	0.632911	1.81818
									550	0	0	0	12.5	2.17391	0	0		550	1.51515	0	0	0	0	0	3.0303			580	2.98507	1.3986	0.757576	0	0	0		570	0	0	0	0.75188	1.07527	0	0
									560	0	0	0	0	0	0	1.04167		560	0	0	1.05263	2.67857	0	0	0			590	1.49254	0.699301	1.51515	1.88679	1.72414	2.27273		580	1.86916	0.52356	0	0	1.07527	0.632911	0
									570	0	0	0	0	0	2.5	0		570	1.51515	0	0	0	0	0	0			600	1.49254	0.699301	0	0.754717	1.72414	0		590	3.73832	1.04712	1.62602	1.50376	1.07527	0	1.81818
									580	0	0	0	0	0	0	0		580	1.51515	0	3.15789	0	0	0	0			610	1.49254	0.699301	0	1.13208	0	2.27273		600	0	1.04712	0	0	0	0	0
									590	0	0	0	0	0	0	1.04167		590	0	0	0	0.892857	0	0	0			620	1.49254	0.699301	0	1.88679	0	0		610	0.934579	0.52356	2.43902	0.75188	1.07527	0.632911	1.81818
									600	0	0	0	0	0	0	0		600	4.54545	0	0	0.892857	0	0	0			630	0	2.0979	0	1.88679	1.72414	0		620	0.934579	0	1.62602	0	1.07527	1.89873	1.81818
									610	0	0	0	0	0	0	0		610	1.51515	0	0	0.892857	0	0	0			640	2.98507	0	0	1.13208	0	2.27273		630	0.934579	0	0.813008	0	2.15054	1.26582	0
									620	0	0	0	0	0	0	0		620	0	0	0	1.78571	0	0	0			650	1.49254	0.699301	0	1.88679	0	0		640	0	0.52356	0	0.75188	0	1.26582	0
									630	0	0	0	0	0	0	1.04167		630	0	0	2.10526	1.78571	0	3.22581	0			660	1.49254	0.699301	1.51515	1.13208	0	4.54545		650	0.934579	1.04712	0.813008	0	0	0.632911	0
									640	0	0	0	0	0	0	2.08333		640	0	0	1.05263	0.892857	0	0	0			670	1.49254	0.699301	0	1.50943	1.72414	0		660	0	0.52356	0.813008	1.50376	2.15054	1.89873	0
									650	0	0	0	0	0	0	0		650	0	0	0	1.78571	0	3.22581	0			680	0	0	0	0.754717	0	2.27273		670	0	0.52356	1.62602	2.25564	0	0.632911	0
									660	2.38095	0	0	0	0	0	0		660	3.0303	0	0	0	0	0	3.0303			690	0	0.699301	0	2.26415	0	0		680	0	0	0.813008	0.75188	0	1.26582	0
									670	0	0	12.5	0	0	0	0		670	1.51515	0	1.05263	1.78571	0	0	3.0303			700	0	2.0979	3.78788	1.50943	0	2.27273		690	0.934579	0.52356	0	0	2.15054	1.26582	0
									680	0	2.22222	0	0	0	0	0		680	0	0	1.05263	0.892857	0	0	0			710	1.49254	0	0	0.754717	0	0		700	0	0.52356	2.43902	0.75188	0	0.632911	0
									690	0	0	0	0	0	0	0		690	0	0	0	0	0	0	3.0303			720	0	0	0	1.50943	1.72414	0		710	0	0.52356	0.813008	0	1.07527	0	0
									700	0	0	0	0	0	0	0		700	0	0	0	0	0	3.22581	0			730	1.49254	0	0.757576	0.377358	0	0		720	0.934579	0.52356	2.43902	0.75188	2.15054	0.632911	0
									710	0	0	0	0	0	0	0		710	1.51515	0	0	0.892857	0	0	0			740	0	0	0.757576	1.50943	0	0		730	0	0	0	1.50376	0	1.26582	0
									720	0	0	0	0	0	0	2.08333		720	0	0	0	0.892857	0	3.22581	3.0303			750	0	0	0	0.754717	0	0		740	1.86916	0	0.813008	0	2.15054	1.26582	0
									730	2.38095	0	0	0	0	0	1.04167		730	1.51515	0	0	0	0	3.22581	3.0303			760	0	1.3986	1.51515	1.13208	0	0		750	2.80374	1.04712	1.62602	0.75188	0	2.53165	1.81818
									740	0	0	0	0	0	0	0		740	0	0	0	2.67857	5	0	0			770	0	0.699301	0.757576	0	0	0		760	0.934579	0.52356	0	0.75188	0	0.632911	0
									750	0	0	0	0	0	0	0		750	0	0	0	2.67857	5	0	0			780	0	0.699301	0.757576	0.377358	0	0		770	0	0.52356	0.813008	0	0	0	0
									760	0	0	0	0	0	0	1.04167		760	0	0	0	0.892857	0	0	3.0303			790	0	1.3986	0.757576	0.754717	0	0		780	0	1.57068	0	0.75188	0	1.26582	0
									770	0	0	0	0	0	0	0		770	1.51515	5.88235	1.05263	0.892857	0	0	0			800	0	0.699301	0.757576	1.88679	0	2.27273		790	0	0.52356	0.813008	0.75188	1.07527	0.632911	0
									780	0	0	0	0	0	0	1.04167		780	0	0	1.05263	0	0	0	3.0303			810	2.98507	0.699301	1.51515	0.754717	0	0		800	0	1.04712	0	0.75188	0	0.632911	0
									790	2.38095	0	0	0	0	0	1.04167		790	0	0	0	0.892857	0	0	0			820	1.49254	0	1.51515	0.377358	0	0		810	0	0	0	0	1.07527	0.632911	0
									800	0	0	0	0	0	0	1.04167		800	0	0	0	1.78571	0	0	3.0303			830	0	0	0	0.377358	5.17241	2.27273		820	3.73832	1.04712	0	0.75188	0	0	0
									810	0	0	0	0	0	5	1.04167		810	0	0	0	0	0	0	0			840	0	0.699301	0.757576	1.13208	1.72414	0		830	1.86916	0	0.813008	0	1.07527	1.89873	1.81818
									820	0	2.22222	0	0	0	0	1.04167		820	0	0	0	1.78571	0	0	0			850	0	0	0.757576	0	3.44828	0		840	0.934579	1.04712	0.813008	0	0	1.26582	1.81818
									830	0	0	0	0	0	0	0		830	0	0	0	0	0	0	0			860	0	0	0.757576	0.377358	0	0		850	0.934579	0.52356	0	0.75188	1.07527	1.26582	0
									840	0	0	0	0	0	0	0		840	0	0	0	0	0	0	0			870	1.49254	0	0	0.754717	0	0		860	0	0.52356	0.813008	0	0	0.632911	0
									850	0	0	0	0	0	0	1.04167		850	1.51515	0	0	0.892857	0	0	0			880	1.49254	0.699301	0.757576	0.754717	0	0		870	2.80374	1.57068	2.43902	0	0	0	0
									860	0	0	0	0	0	0	1.04167		860	1.51515	0	1.05263	0	0	3.22581	0			890	0	0.699301	0.757576	0.377358	0	0		880	0	0.52356	0.813008	0.75188	2.15054	1.26582	0
									870	0	0	0	0	0	0	1.04167		870	0	0	0	0	0	0	0			900	0	0	0.757576	2.26415	0	0		890	0	1.04712	0	1.50376	1.07527	1.89873	0
									880	0	0	0	0	0	0	1.04167		880	0	0	1.05263	0.892857	0	0	0			910	0	0	1.51515	0.377358	0	2.27273		900	1.86916	1.04712	0.813008	0	1.07527	0	0
									890	0	0	0	0	0	0	2.08333		890	0	0	0	0	0	0	0			920	0	0	0	0	0	0		910	0	0.52356	0	1.50376	0	1.26582	0
									900	0	0	0	0	0	0	0		900	0	0	0	0	0	0	0			930	0	0.699301	0	0.754717	0	2.27273		920	0.934579	0.52356	0	0	0	0.632911	0
									910	0	0	0	0	0	0	1.04167		910	0	0	0	0.892857	0	0	0			940	0	0.699301	0	0	1.72414	0		930	0.934579	0.52356	0	0.75188	0	0	0
									920	0	0	0	0	0	0	1.04167		920	0	0	0	0.892857	0	0	0			950	0	0	0	0	1.72414	0		940	0.934579	1.04712	0	0	2.15054	1.26582	0
									930	0	0	0	0	0	0	0		930	1.51515	5.88235	3.15789	0.892857	0	0	0			960	1.49254	0	0.757576	0.754717	0	0		950	0	1.57068	0	0	0	0	0
									940	0	0	0	0	0	0	1.04167		940	0	0	0	0	0	3.22581	0			970	0	0	0	0	0	0		960	0.934579	0.52356	0	0	1.07527	0.632911	0
									950	0	0	0	0	0	0	0		950	1.51515	0	0	0.892857	0	0	0			980	0	0	0.757576	1.13208	0	0		970	0	0.52356	1.62602	0	0	0.632911	0
									960	0	0	0	0	0	0	0		960	0	5.88235	0	0	0	0	0			990	0	0	1.51515	0.377358	0	0		980	0	0	0	0.75188	0	1.26582	0
									970	0	0	0	0	0	0	0		970	0	0	1.05263	0.892857	0	0	0			1000	0	0	0.757576	0	0	0		990	0	1.57068	0	0	0	0.632911	1.81818
									980	0	0	0	0	0	0	1.04167		980	0	0	0	0.892857	0	0	0			1010	0	0	0	1.13208	0	2.27273		1000	0	0.52356	1.62602	1.50376	1.07527	1.26582	0
									990	0	0	0	0	0	0	0		990	0	0	0	0.892857	0	0	0			1020	0	0.699301	0	0.377358	0	2.27273		1010	0	1.57068	0	0.75188	0	0.632911	0
									1000	0	0	0	0	0	0	0		1000	0	0	0	0.892857	0	0	0			1030	1.49254	0	0	0	0	0		1020	0.934579	0	0	0	0	0	0
									1010	0	0	0	0	0	0	0		1010	0	0	0	0.892857	0	0	3.0303			1040	0	0	0.757576	0	0	0		1030	0.934579	0.52356	0	0.75188	0	0	0
									1020	0	0	0	0	0	0	0		1020	0	0	0	0	0	0	0			1050	1.49254	0	0.757576	0	0	0		1040	0	1.04712	0	1.50376	0	0.632911	0
									1030	0	0	0	0	0	0	0		1030	0	0	0	0	0	0	3.0303			1060	0	0	0	0.754717	1.72414	0		1050	1.86916	0	0	0	0	1.26582	1.81818
									1040	0	0	0	0	0	0	1.04167		1040	0	0	0	0	0	0	0			1070	0	0	0.757576	0.377358	1.72414	2.27273		1060	0	1.04712	1.62602	0	0	0	0
									1050	0	0	0	0	0	0	0		1050	0	0	1.05263	0	0	0	0			1080	0	0	0.757576	0.377358	0	0		1070	0.934579	3.14136	1.62602	0	0	0.632911	0
									1060	0	0	0	0	0	0	0		1060	0	0	0	0	0	0	0			1090	0	0	0	0.754717	0	0		1080	0	0	0	0.75188	0	1.89873	0
									1070	0	0	0	0	0	0	0		1070	0	0	0	0	0	0	0			1100	0	0	0.757576	0.377358	3.44828	0		1090	0	0.52356	0	1.50376	0	1.26582	1.81818
									1080	0	0	0	0	0	2.5	2.08333		1080	0	0	1.05263	0	0	0	0			1110	0	0	0	0	0	0		1100	1.86916	1.04712	0	0.75188	1.07527	0.632911	0
									1090	0	0	0	0	0	0	0		1090	0	0	0	0	0	0	0			1120	0	0	0	0	1.72414	2.27273		1110	0.934579	0.52356	0.813008	1.50376	0	0	0
									1100	0	0	0	0	0	0	0		1100	0	0	0	0	0	0	0			1130	0	0	0.757576	0.377358	0	0		1120	0.934579	0.52356	2.43902	0	0	0	0
									1110	0	0	0	0	0	0	1.04167		1110	0	5.88235	1.05263	0.892857	0	0	0			1140	0	0	1.51515	0	1.72414	2.27273		1130	0.934579	1.04712	0	0	1.07527	1.26582	0
									1120	2.38095	0	0	0	0	0	0		1120	0	0	0	0.892857	0	0	0			1150	0	0	0.757576	1.13208	0	0		1140	0.934579	0.52356	0.813008	0	0	1.89873	1.81818
									1130	0	0	0	0	0	2.5	0		1130	0	0	1.05263	0	0	0	0			1160	0	0	0.757576	0.754717	1.72414	2.27273		1150	0.934579	1.57068	0.813008	0	0	1.26582	1.81818
									1140	0	0	0	0	0	0	1.04167		1140	0	0	0	0	0	0	0			1170	0	0	0	0.377358	1.72414	0		1160	0	1.04712	0	0	0	0	0
									1150	0	0	0	0	0	0	0		1150	0	0	0	0	0	0	0			1180	0	0	0	0	0	0		1170	0	0.52356	0	0	0	1.26582	0
									1160	0	0	0	0	0	0	1.04167		1160	0	0	0	0.892857	5	0	0			1190	0	0	0.757576	0	1.72414	0		1180	0	1.04712	0.813008	2.25564	0	0.632911	0
									1170	0	0	0	0	0	0	0		1170	0	0	0	0	0	0	0			1200	0	0	0	0	0	0		1190	0	0.52356	0.813008	0.75188	0	0.632911	0
									1180	0	0	0	0	0	0	1.04167		1180	0	0	0	0	0	0	0			1210	0	0	0.757576	0.377358	0	0		1200	0	0.52356	0.813008	0	1.07527	0.632911	0
									1190	0	0	0	0	0	0	0		1190	0	0	0	0	0	0	0			1220	0	0	0	0	0	0		1210	0.934579	1.04712	1.62602	0	0	0.632911	0
									1200	0	0	0	0	0	0	0		1200	0	0	0	0	0	0	0			1230	0	0	0	0	0	0		1220	0	0.52356	0.813008	0	0	1.26582	0
									1210	0	0	0	0	0	0	0		1210	0	0	0	0	0	0	0			1240	0	0	0.757576	0.754717	0	2.27273		1230	0	0.52356	0	0.75188	0	0.632911	0
									1220	0	0	0	0	0	0	1.04167		1220	0	0	1.05263	0.892857	0	0	0			1250	0	0	0	0	1.72414	0		1240	0	1.04712	0	0.75188	0	0.632911	1.81818
									1230	0	0	0	0	0	0	1.04167		1230	0	0	0	0	0	0	0			1260	0	0	0	0	1.72414	0		1250	0.934579	1.04712	0	1.50376	1.07527	1.26582	0
									1240	0	0	0	0	0	0	1.04167		1240	0	0	0	0	0	0	0			1270	0	0	2.27273	0	0	0		1260	0	1.04712	0	1.50376	0	0.632911	0
									1250	0	0	0	0	0	0	0		1250	0	0	0	0	5	0	0			1280	0	0.699301	0	0	0	0		1270	0	0	0	0.75188	0	0.632911	0
									1260	0	0	0	0	0	0	1.04167		1260	0	0	0	0	0	0	0			1290	0	0	0	0.377358	0	0		1280	0	1.57068	0	0.75188	1.07527	0.632911	0
									1270	0	0	0	0	0	0	0		1270	0	0	1.05263	0	0	0	0			1300	0	0	0	0	1.72414	0		1290	0	0	0	1.50376	0	0	0
									1280	0	0	0	0	0	0	0		1280	0	0	0	0.892857	0	0	0			1310	0	0	0	0	0	0		1300	0	1.04712	0.813008	1.50376	0	0	1.81818
									1290	0	0	0	0	0	0	1.04167		1290	0	0	0	0.892857	0	0	0			1320	0	0	1.51515	0.377358	1.72414	0		1310	0	0	0.813008	0	0	0	0
									1300	0	0	0	0	0	0	0		1300	0	0	0	0	0	0	0			1330	0	0	0	0.377358	0	0		1320	0	0	0.813008	1.50376	0	0	0
									1310	0	0	0	0	0	0	2.08333		1310	0	0	0	0	0	0	0			1340	0	0	0.757576	0	0	0		1330	0	0	0	0	0	0	0
									1320	0	0	0	0	0	0	1.04167		1320	0	0	0	0.892857	0	0	0			1350	1.49254	0	0	0	0	0		1340	0	1.57068	0	0	0	0.632911	0
									1330	0	0	0	0	0	0	0		1330	0	0	1.05263	0	0	0	0			1360	0	0	0	0.377358	0	0		1350	1.86916	0.52356	0	0.75188	0	0	0
									1340	0	0	0	0	0	0	1.04167		1340	0	0	0	0	0	0	0			1370	0	0	0	0	0	0		1360	0	1.04712	0.813008	0.75188	0	0	0
									1350	0	0	0	0	0	0	1.04167		1350	0	0	0	0	0	0	0			1380	0	0	0	0	0	0		1370	0	1.04712	0	1.50376	0	0	0
									1360	0	0	0	0	0	0	1.04167		1360	0	0	0	0.892857	0	0	0			1390	0	0	0	0	0	2.27273		1380	0	0.52356	0	0	1.07527	0.632911	0
									1370	0	0	0	0	0	0	1.04167		1370	0	0	0	0	0	0	0			1400	0	0	0	0	1.72414	0		1390	0	0.52356	0.813008	0	0	0	0
									1380	0	0	0	0	0	0	0		1380	0	0	0	0	0	0	0			1410	0	0	0	0	0	0		1400	0	0	0	0	0	0	0
									1390	0	0	0	0	0	0	1.04167		1390	0	0	0	0	0	0	0			1420	0	0	0	0	0	2.27273		1410	0.934579	0.52356	0	0	0	0	0
									1400	0	0	0	0	0	0	0		1400	1.51515	0	0	0	0	0	0			1430	0	0	0	0	1.72414	0		1420	0	0	0.813008	0	0	0	0
									1410	0	0	0	0	0	0	0		1410	0	0	0	0	0	0	0			1440	0	0	0	0	0	0		1430	0	0.52356	0	0.75188	0	0	0
									1420	0	0	0	0	0	0	0		1420	1.51515	0	1.05263	0	0	0	0			1450	0	0	0	0	0	0		1440	0	0	0	0.75188	0	0.632911	1.81818
									1430	0	0	0	0	0	0	0		1430	0	0	0	0	0	0	0			1460	0	0	0	0.377358	1.72414	0		1450	0.934579	0	1.62602	0	0	0.632911	0
									1440	0	0	0	0	0	2.5	0		1440	0	0	1.05263	0	0	0	0			1470	0	0	0	0	0	0		1460	0	0	0	0	0	0.632911	0
									1450	0	0	0	0	0	0	0		1450	0	0	0	0	0	0	0			1480	1.49254	0	0.757576	0	0	0		1470	0.934579	0	0	0	0	0.632911	0
									1460	0	0	0	0	0	0	2.08333		1460	0	0	0	0	0	0	0			1490	0	0	0	0	0	0		1480	0	1.04712	0.813008	0	0	0	0
									1470	0	0	0	0	0	0	2.08333		1470	0	0	1.05263	0	0	0	0			1500	0	0	0	0	0	0		1490	0	0.52356	0	0	0	0	0
									1480	0	0	0	0	0	0	1.04167		1480	0	0	0	0	0	0	0			1510	0	0	0	0	0	0		1500	0	0.52356	0	0	0	0.632911	0
									1490	0	0	0	0	0	0	0		1490	0	0	0	0	0	0	0			1520	0	0	0	0	1.72414	0		1510	0.934579	0	0.813008	0	0	0.632911	0
									1500	0	0	0	0	0	0	1.04167		1500	0	0	0	0	0	0	0			1530	0	0	0	0	0	0		1520	0	0	0.813008	0.75188	0	0.632911	0
									1510	0	0	0	0	0	0	2.08333		1510	0	0	0	0	0	0	0			1540	0	0	0	0	0	0		1530	0	0	0	0	0	0.632911	0
									1520	0	0	0	0	0	0	0		1520	0	0	0	0	0	0	0			1550	0	0	0	0	0	0		1540	0	0	2.43902	0	1.07527	0	0
									1530	0	0	0	0	0	0	0		1530	0	0	0	0	0	0	0			1560	0	0	0	0	0	2.27273		1550	0	0	0.813008	0.75188	0	0.632911	0
									1540	0	0	0	0	0	0	0		1540	0	0	0	0	0	0	0			1570	0	0	0	0	0	0		1560	0.934579	1.57068	0	0	0	0	0
									1550	0	0	0	0	0	0	1.04167		1550	0	0	0	0.892857	0	0	0			1580	0	0	0	0	0	0		1570	0	0	0	0	1.07527	0	0
									1560	0	0	0	0	0	0	1.04167		1560	0	0	0	0	0	0	0			1590	0	0	0	0	0	2.27273		1580	0	0	0	0	0	0	0
									1570	2.38095	0	0	0	0	0	0		1570	0	0	0	0	0	0	0			1600	0	0	0	0	0	0		1590	0	0.52356	0	0	0	0	1.81818
									1580	0	0	0	0	0	0	0		1580	0	0	0	0	0	0	0			1610	0	0	0	0	0	0		1600	0	0.52356	0.813008	0	0	0	0
									1590	0	0	0	0	0	0	0		1590	1.51515	0	1.05263	0	0	0	0			1620	0	0	0	0	0	0		1610	0	1.04712	0	0	0	0	0
									1600	0	0	0	0	0	0	0		1600	0	0	0	0	0	0	0			1630	0	0	0	0	0	0		1620	0.934579	1.04712	1.62602	0	0	0	0
									1610	0	0	0	0	0	0	1.04167		1610	0	0	0	0.892857	0	0	0			1640	0	0	0	0	0	0		1630	0	0	0	0.75188	0	0	0
									1620	0	0	0	0	0	0	0		1620	0	0	0	0.892857	0	0	0			1650	0	0	0	0	0	0		1640	0.934579	0	0.813008	0	0	0	0
									1630	0	0	0	0	0	0	0		1630	0	0	0	0	0	0	0			1660	0	0	0	0	0	0		1650	0	0.52356	0	0	0	0	0
									1640	0	0	0	0	0	0	2.08333		1640	0	0	0	0.892857	10	3.22581	0			1670	0	0	0.757576	0	0	2.27273		1660	0	0	0	0	1.07527	0	0
									1650	0	0	0	0	0	0	2.08333		1650	0	0	0	0	0	0	0			1680	0	0	0	0	0	0		1670	1.86916	0	0.813008	0	0	0	3.63636
									1660	0	0	0	0	0	0	2.08333		1660	0	0	0	0	0	0	0			1690	0	0	0	0	0	0		1680	0.934579	0	0	0.75188	0	0	0
									1670	0	0	0	0	0	0	0		1670	0	0	0	0	5	0	0			1700	0	0	0	0	0	0		1690	0	1.57068	0	0	0	0	0
									1680	0	0	0	0	0	0	0		1680	0	0	0	0	0	0	0			1710	0	0	0	0	0	0		1700	0	0.52356	0	0	0	0	0
									1690	0	0	0	0	0	0	0		1690	0	0	0	0	0	0	0			1720	0	0	0	0	0	0		1710	0	1.04712	0.813008	0	0	0.632911	0
									1700	0	0	0	0	0	0	0		1700	0	0	0	0	0	0	0			1730	0	0	0	0	0	0		1720	0.934579	0.52356	0	0.75188	0	0.632911	1.81818
									1710	0	0	0	0	0	0	2.08333		1710	0	0	0	0	0	0	0			1740	0	0	0	0	0	0		1730	0	0	0	0	0	0	0
									1720	0	0	0	0	0	0	0		1720	0	0	0	0	0	0	0			1750	0	0	0	0	0	0		1740	0	0	0	0	0	0	0
									1730	0	0	0	0	0	0	0		1730	0	0	0	0	0	0	0			1760	0	0	0	0	0	0		1750	0	0.52356	0	0.75188	0	0	0
									1740	0	0	0	0	0	0	0		1740	0	0	1.05263	0	0	0	0			1770	0	0	0	0	0	0		1760	0	0.52356	0	0.75188	0	0	0
									1750	0	0	0	0	0	0	0		1750	0	0	0	0	0	0	0			1780	0	0	0	0	0	0		1770	0	0	0	0	0	0	0
									1760	0	0	0	0	0	0	0		1760	0	0	0	0	0	0	0			1790	0	0	0	0	0	0		1780	0	0	0	0	0	0	0
									1770	0	0	0	0	0	0	0		1770	0	0	0	0	0	0	0			1800	0	0	0	0	0	0		1790	0	0	0.813008	0.75188	0	0	0
									1780	0	0	0	0	0	0	0		1780	0	0	0	0.892857	5	0	0			1810	0	0	0	0	0	0		1800	0	0.52356	0	0	0	0	0
									1790	0	0	0	0	0	0	1.04167		1790	0	0	0	0	0	0	0			1820	0	0	0	0	0	0		1810	0	0	1.62602	0	0	0	0
									1800	0	0	0	0	0	0	0		1800	0	0	0	0	0	0	0			1830	0	0	0	0	0	0		1820	0	0	0	0	0	0.632911	0
									1810	0	0	0	0	0	0	1.04167		1810	0	0	0	0	0	0	0			1840	0	0	0	0	1.72414	0		1830	0	0	0	0	0	0	0
									1820	0	0	0	0	0	0	2.08333		1820	0	0	0	0	0	0	0			1850	0	0	0	0	0	0		1840	0.934579	0	0	0.75188	0	0	0
									1830	0	0	0	0	0	0	0		1830	0	0	0	0	0	0	0			1860	0	0	0	0	0	0		1850	0.934579	0	0	0	0	0	0
									1840	0	0	0	0	0	0	1.04167		1840	0	0	0	0	0	0	0			1870	0	0	0	0	0	0		1860	0.934579	0	0.813008	0	0	0	0
									1850	0	0	0	0	0	0	0		1850	0	0	0	0	0	0	0			1880	0	0	0	0	0	0		1870	0.934579	0	0	0	0	0	0
									1860	0	0	0	0	0	0	0		1860	0	0	0	0	0	0	0			1890	0	0	0	0	0	0		1880	0	0	0	0	0	0	0
									1870	0	0	0	0	0	0	1.04167		1870	0	0	0	0	0	0	0			1900	0	0	0	0	0	0		1890	0	0.52356	0	0	0	0	0
									1880	0	0	0	0	0	0	0		1880	0	0	0	0	0	0	0			1910	0	0	0	0	0	0		1900	0.934579	0.52356	0	0	0	0	0
									1890	0	0	0	0	0	0	0		1890	0	0	0	0	0	0	0			1920	0	0.699301	0	0	0	0		1910	0	0	0	0.75188	0	0	0
									1900	0	0	0	0	0	0	1.04167		1900	0	0	0	0	0	0	0			1930	0	0	0	0	0	0		1920	0	0	0.813008	0	0	0	0
									1910	0	0	0	0	0	0	0		1910	0	0	0	0	0	0	0			1940	0	0	0	0	0	0		1930	0	0	0	0	0	0	0
									1920	0	0	0	0	0	0	0		1920	0	0	0	0	0	0	0			1950	0	0	0	0	0	0		1940	0	0	0	0	0	0	0
									1930	0	0	0	0	0	0	0		1930	0	0	0	0	0	0	0			1960	0	0	0	0	0	0		1950	0	0	0	0.75188	0	0	0
									1940	0	0	0	0	0	0	0		1940	0	0	0	0	0	0	0			1970	0	0	0	0	0	0		1960	0	0	0.813008	0	0	0	0
									1950	0	0	0	0	0	0	0		1950	0	0	0	0	0	0	0			1980	0	0	0	0	0	0		1970	0	0	0	0	0	0	0
									1960	0	0	0	0	0	0	0		1960	0	0	0	0	0	0	0			1990	0	0	0	0	0	0		1980	0	0	0	0	0	0	0
									1970	0	0	0	0	0	0	0		1970	0	0	0	0	0	0	0			2000	0	0	0	0	0	0		1990	0	0	0	0	0	0	0
									1980	0	0	0	0	0	0	1.04167		1980	0	0	0	0	0	0	0			2010	0	0	0	0	0	0		2000	0	0	0	0	0	0	0
									1990	0	0	0	0	0	0	1.04167		1990	0	0	0	0	0	0	0			2020	0	0	0	0	0	0		2010	0	0	0	0	0	0	1.81818
									2000	0	0	0	0	0	0	1.04167		2000	0	0	0	0	0	0	0			2030	0	0	0	0	0	0		2020	0	0	0	0	0	0	1.81818
									2010	0	0	0	0	0	0	0		2010	0	0	0	0	0	0	0			2040	0	0	0	0	0	0		2030	0	0	0	0	0	0	0
									2020	0	0	0	0	0	0	0		2020	0	0	0	0.892857	0	0	0			2050	0	0	0	0	0	0		2040	0	0	0	0	0	0	0
									2030	0	0	0	0	0	0	0		2030	0	0	0	0	0	0	0			2060	0	0	0	0	0	0		2050	0	0	0	0	0	0	0
									2040	0	0	0	0	0	0	0		2040	0	0	0	0	0	0	0			2070	0	0	0	0	0	0		2060	0	0.52356	0	0	0	0	1.81818
									2050	0	0	0	0	0	0	0		2050	0	0	0	0	0	0	0			2080	0	0	0	0	0	0		2070	0	0	0	0.75188	0	0	1.81818
									2060	0	0	0	0	0	0	0		2060	0	0	0	0	0	0	0			2090	0	0	0	0	0	0		2080	0	0	0	0.75188	0	0	0
									2070	0	0	0	0	0	0	0		2070	0	0	0	0	0	0	0			2100	0	0	0	0	0	0		2090	0.934579	0	0	0	0	0	0
									2080	0	0	0	0	0	0	0		2080	0	0	0	0	0	0	0			2110	0	0	0	0	0	0		2100	0	0	0.813008	0	0	0	0
									2090	0	0	0	0	0	0	0		2090	0	0	0	0	0	0	0			2120	0	0	0	0	0	0		2110	0	0	0	0	0	0	0
									2100	0	0	0	0	0	0	0		2100	0	0	0	0	0	0	0			2130	0	0	0	0	0	0		2120	0	0	0	0	0	0	0
									2110	0	0	0	0	0	0	0		2110	0	0	0	0	0	0	0			2140	0	0	0	0	0	0		2130	0	1.04712	0	0	0	0	1.81818
									2120	0	0	0	0	0	0	0		2120	0	0	0	0	0	0	0			2150	0	0	0	0	0	0		2140	0	0	0	0	0	0	0
									2130	0	0	0	0	0	0	0		2130	0	0	0	0	0	0	0			2160	0	0	0	0	0	0		2150	0	0	0	0	0	0	0
									2140	0	0	0	0	0	0	0		2140	0	0	0	0	0	0	0			2170	0	0	0	0	0	0		2160	0	0	0	0	0	0	0
									2150	0	0	0	0	0	0	0		2150	0	0	0	0	0	0	0			2180	0	0	0	0	0	0		2170	0	0	0.813008	0	0	0	0
									2160	0	0	0	0	0	0	0		2160	0	0	0	0	0	0	0			2190	0	0	0	0	0	0		2180	0	0	0	0	0	0	0
									2170	0	0	0	0	0	0	0		2170	0	0	0	0	0	0	0			2200	0	0	0	0	0	0		2190	0	0	0	0	0	0	0
									2180	0	0	0	0	0	0	0		2180	0	0	0	0	0	0	0			2210	0	0	0	0	0	0		2200	0	0	0	0	0	0	0
									2190	0	0	0	0	0	0	0		2190	0	0	0	0	0	0	0			2220	0	0	0	0	0	0		2210	0	0	0	0	0	0	0
									2200	0	0	0	0	0	0	0		2200	0	0	0	0	0	0	0			2230	0	0	0	0	1.72414	0		2220	0	0	0	0	0	0	0
									2210	0	0	0	0	0	0	0		2210	0	0	0	0	0	0	0			sum	5.97015	2.0979	15.9091	9.81132	32.7586	27.2727		2230	0	0	0	0	0	0	0
									2220	0	0	0	0	0	0	2.08333		2220	0	0	1.05263	0	0	0	0											2240	0	0	0	0.75188	0	0	0
									2230	0	0	0	0	0	0	0		2230	0	0	0	0	5	0	0											2250	0	0.52356	0	0	0	0	0
									2240	0	0	0	0	0	0	0		2240	0	0	0	0	0	0	0											2260	0	0	0	0	0	0	0
									2250	0	0	0	0	0	0	1.04167		2250	0	0	0	0	0	0	0											2270	0	0	0	0	0	0	0
									2260	0	0	0	0	0	0	0		2260	0	0	0	0	0	0	0											2280	0	0	0	0	0	0	0
									2270	0	0	0	0	0	0	0		2270	0	0	0	0	0	0	0											2290	0	0	0	0	0	0	0
									2280	0	0	0	0	0	0	0		2280	0	0	0	0	0	0	0											2300	0	0	0	0	0	0	0
									2290	0	0	0	0	0	0	0		2290	0	0	0	0	0	0	0											2310	0	0	0	0	0	0	0
									2300	0	0	0	0	0	0	0		2300	0	0	0	0	0	0	0											2320	0	0	0	0	0	0	0
									2310	0	0	0	0	0	0	0		2310	0	0	0	0	0	0	0											2330	0	0	0.813008	0	0	0	0
									2320	0	0	0	0	0	0	0		2320	0	0	0	0	0	0	0											2340	0	0	0	0	0	0	0
									2330	0	0	0	0	0	0	0		2330	0	0	0	0	0	0	0											2350	0	0	0.813008	0	0	0	0
									2340	0	0	0	0	0	0	0		2340	0	0	0	0	0	0	0											2360	0	0	0	0	0	0	0
									2350	0	0	0	0	0	0	0		2350	0	0	0	0	0	0	0											2370	0	0	0	0	0	0	0
									2360	0	0	0	0	0	0	0		2360	0	0	0	0	0	0	0											2380	0	0	0	0	0	0	0
									2370	0	0	0	0	0	0	0		2370	0	0	0	0	0	0	0											2390	0	0	0	0	0	0	0
									2380	0	0	0	0	0	0	0		2380	0	0	0	0	0	0	0											2400	0	0.52356	0	0	0	0	0
									2390	0	0	0	0	0	0	0		2390	0	0	0	0	0	0	0											2410	0	0	0	0	0	0	0
									2400	0	0	0	0	0	0	0		2400	0	0	0	0	0	0	0											2420	0	0	0	0	0	0	0
									2410	0	0	0	0	0	0	0		2410	0	0	0	0	0	0	0											2430	0	0	0	0	0	0	0
									2420	0	0	0	0	0	0	2.08333		2420	0	0	0	0	0	0	0											2440	0	0	0	0	0	0.632911	0
									2430	0	0	0	0	0	0	0		2430	0	0	0	0	0	0	0											2450	0	0	0	0	0	0	0
									2440	0	0	0	0	0	0	0		2440	0	0	0	0	0	0	0											2460	0	0	0	0	0	0	0
									2450	0	0	0	0	0	0	0		2450	0	0	0	0	0	0	0											2470	0	0	0	0	0	0	0
									2460	0	0	0	0	0	0	0		2460	0	0	0	0	0	0	0											2480	0	0	0	0	0	0	0
									2470	0	0	0	0	0	0	0		2470	0	0	0	0	0	0	0											2490	0	0	0	0	0	0	0
									2480	0	0	0	0	0	0	0		2480	0	0	0	0	0	0	0											2500	0	0	0	0	0	0	0
									2490	0	0	0	0	0	0	0		2490	0	0	0	0	0	0	0											2510	0	0	0	0	0	0	0
									2500	0	0	0	0	0	0	0		2500	0	0	0	0	0	0	0											2520	0	0	0	0	0	0	0
									2510	0	0	0	0	0	0	0		2510	0	0	0	0.892857	0	0	0											2530	0	0	0	0	0	0	0
									2520	0	0	0	0	0	0	0		2520	0	0	0	0	0	0	0											2540	0	0	0	0	0	0	0
									2530	0	0	0	0	0	0	0		2530	0	0	0	0	0	0	0											2550	0	0	0	0	0	0	0
									2540	0	0	0	0	0	0	0		2540	0	0	0	0	0	0	0											2560	0	0	0.813008	0	0	0	0
									2550	0	0	0	0	0	0	0		2550	0	0	0	0	0	0	0
									2560	0	0	0	0	0	0	0		2560	0	0	0	0	0	0	0
									2570	0	0	0	0	0	0	0		2570	0	0	0	0	0	0	0
									2580	0	0	0	0	0	0	0		2580	0	0	0	0	0	0	0
									2590	0	0	0	0	0	0	0		2590	0	0	0	0	0	0	0
									2600	0	0	0	0	0	0	0		2600	0	0	0	0	0	0	0
									2610	0	0	0	0	0	0	0		2610	0	0	0	0	0	0	0
									2620	0	0	0	0	0	0	0		2620	0	0	0	0	0	0	0
									2630	0	0	0	0	0	0	0		2630	0	0	0	0	0	0	0
									2640	0	0	0	0	0	0	0		2640	0	0	0	0	0	0	0
									2650	0	0	0	0	0	0	0		2650	0	0	0	0	0	0	0
									2660	0	0	0	0	0	0	0		2660	0	0	0	0	0	0	0
									2670	0	0	0	0	0	0	1.04167		2670	0	0	0	0	0	0	0
																		2680	0	0	0	0	0	0	0
																		2690	0	0	0	0	0	0	0
																		2700	0	0	0	0	0	0	0
																		2710	0	0	0	0	0	0	0
																		2720	0	0	0	0	0	0	0
																		2730	0	0	0	0	0	0	0
																		2740	0	0	0	0	0	0	0
																		2750	0	0	0	0	0	0	0
																		2760	0	0	0	0	0	0	0
																		2770	0	0	0	0	0	0	0
																		2780	0	0	0	0	0	0	0
																		2790	0	0	0	0	0	0	0
																		2800	0	0	0	0	0	0	0
																		2810	0	0	0	0	0	0	0
																		2820	0	0	0	0	0	0	0
																		2830	0	0	0	0	0	0	0
																		2840	0	0	0	0	0	0	0
																		2850	0	0	0	0	0	0	0
																		2860	0	0	0	0	0	0	0
																		2870	0	0	0	0	0	0	0
																		2880	0	0	0	0	0	0	0
																		2890	0	0	0	0	0	0	0
																		2900	0	0	0	0	0	0	0
																		2910	0	0	0	0	0	0	0
																		2920	0	0	0	0	0	0	0
																		2930	0	0	0	0	0	0	0
																		2940	0	0	0	0	0	0	0
																		2950	0	0	0	0	0	0	0
																		2960	0	0	0	0	0	0	0
																		2970	0	0	0	0	0	0	0
																		2980	0	0	0	0	0	0	0
																		2990	0	0	0	0	0	0	0
																		3000	0	0	0	0	0	0	0
																		3010	0	0	0	0	0	0	0
																		3020	0	0	0	0	0	0	0
																		3030	0	0	0	0	0	0	0
																		3040	0	0	0	0	0	0	0
																		3050	0	0	0	0	0	0	0
																		3060	0	0	0	0	0	0	0
																		3070	0	0	0	0	0	0	0
																		3080	0	0	0	0	0	0	0
																		3090	0	0	0	0	0	0	0
																		3100	0	0	0	0	0	0	0
																		3110	0	0	0	0	0	0	0
																		3120	0	0	0	0	0	0	0
																		3130	0	0	0	0	0	0	0
																		3140	0	0	0	0	0	0	0
																		3150	0	0	0	0	0	0	0
																		3160	0	0	0	0	0	0	0
																		3170	0	0	0	0	0	0	0
																		3180	0	0	0	0	0	0	0
																		3190	0	0	0	0	0	0	0
																		3200	0	0	0	0	0	0	0
																		3210	0	0	0	0	0	0	0
																		3220	0	0	0	0	0	0	0
																		3230	0	0	0	0	0	0	0
																		3240	0	0	0	0	0	0	0
																		3250	0	0	0	0	0	0	0
																		3260	0	0	0	0	0	0	0
																		3270	0	0	0	0	0	0	0
																		3280	0	0	0	0	0	0	0
																		3290	0	0	0	0	0	0	0
																		3300	0	0	0	0	0	0	0
																		3310	0	0	0	0	0	0	0
																		3320	0	0	0	0	0	0	0
																		3330	0	0	0	0	0	0	0
																		3340	0	0	0	0	0	0	0
																		3350	0	0	0	0	0	0	0
																		3360	0	0	0	0	0	0	0
																		3370	0	0	0	0	0	0	0
																		3380	0	0	0	0	0	0	0
																		3390	0	0	0	0	0	0	0
																		3400	0	0	0	0	0	0	0
																		3410	0	0	0	0	0	0	0
																		3420	0	0	0	0	0	0	0
																		3430	0	0	0	0	0	0	0
																		3440	0	0	0	0	0	0	0
																		3450	0	0	0	0	0	0	0
																		3460	0	0	0	0	0	0	0
																		3470	0	0	0	0	0	0	0
																		3480	0	0	0	0	0	0	0
																		3490	0	0	0	0	0	0	0
																		3500	0	0	0	0	0	0	0
																		3510	0	0	0	0	0	0	0
																		3520	0	0	0	0	0	0	0
																		3530	0	0	0	0	0	0	0
																		3540	0	0	0	0	0	0	0
																		3550	0	0	0	0	0	0	0
																		3560	0	0	0	0	0	0	0
																		3570	0	0	0	0	0	0	0
																		3580	0	0	0	0	0	0	0
																		3590	0	0	0	0	0	0	0
																		3600	0	0	0	0	0	0	0
																		3610	0	0	0	0	0	0	0
																		3620	0	0	0	0	0	0	0
																		3630	0	0	0	0	0	0	0
																		3640	0	0	0	0	0	0	0
																		3650	0	0	0	0	0	0	0
																		3660	0	0	0	0	0	0	0
																		3670	0	0	0	0	0	0	0
																		3680	0	0	0	0	0	0	0
																		3690	0	0	0	0	0	0	0
																		3700	0	0	0	0	0	0	0
																		3710	0	0	0	0	0	0	0
																		3720	0	0	0	0	0	0	0
																		3730	0	0	0	0	0	0	0
																		3740	0	0	0	0	0	0	0
																		3750	0	0	0	0	0	0	0
																		3760	0	0	0	0	0	0	0
																		3770	0	0	0	0	0	0	0
																		3780	0	0	0	0	0	0	0
																		3790	0	0	0	0	0	0	0
																		3800	0	0	0	0	0	0	0
																		3810	0	0	0	0	0	0	0
																		3820	0	0	0	0	0	0	0
																		3830	0	0	0	0	0	0	0
																		3840	0	0	0	0	0	0	0
																		3850	0	0	0	0	0	0	0
																		3860	0	0	0	0	0	0	0
																		3870	0	0	0	0	0	0	0
																		3880	0	0	0	0	0	0	0
																		3890	0	0	0	0	0	0	0
																		3900	0	0	0	0	0	0	0
																		3910	0	0	0	0	0	0	0
																		3920	0	0	0	0	0	0	0
																		3930	0	0	0	0	0	0	0
																		3940	0	0	0	0	0	0	0
																		3950	0	0	0	0	0	0	0
																		3960	0	0	0	0	0	0	0
																		3970	0	0	0	0	0	0	0
																		3980	0	0	0	0	0	0	0
																		3990	0	0	0	0	0	0	0
																		4000	0	0	0	0	0	0	0
																		4010	0	0	0	0	0	0	0
																		4020	0	0	0	0	0	0	0
																		4030	0	0	0	0	0	0	0
																		4040	0	0	0	0	0	0	0
																		4050	0	0	0	0	0	0	0
																		4060	0	0	0	0	0	0	0
																		4070	0	0	0	0	0	0	0
																		4080	0	0	0	0	0	0	0
																		4090	0	0	0	0	0	0	0
																		4100	0	0	0	0	0	0	0
																		4110	0	0	0	0	0	0	0
																		4120	0	0	0	0	0	0	0
																		4130	0	0	0	0	0	0	0
																		4140	0	0	0	0	0	0	0
																		4150	0	0	0	0	0	0	0
																		4160	0	0	0	0	0	0	0
																		4170	0	0	0	0	0	0	0
																		4180	0	0	0	0	0	0	0
																		4190	0	0	0	0	0	0	0
																		4200	0	0	0	0	0	0	0
																		4210	0	0	0	0	0	0	0
																		4220	0	0	0	0	0	0	0
																		4230	0	0	0	0	0	0	0
																		4240	0	0	0	0	0	0	0
																		4250	0	0	0	0	0	0	0
																		4260	0	0	0	0	0	0	0
																		4270	0	0	0	0	0	0	0
																		4280	0	0	0	0	0	0	0
																		4290	0	0	0	0	0	0	0
																		4300	0	0	0	0	0	0	0
																		4310	0	0	0	0	0	0	0
																		4320	0	0	0	0	0	0	0
																		4330	0	0	0	0	0	0	0
																		4340	0	0	0	0	0	0	0
																		4350	0	0	0	0	0	0	0
																		4360	0	0	0	0	0	0	0
																		4370	0	0	0	0	0	0	0
																		4380	0	0	0	0	0	0	0
																		4390	0	0	0	0	0	0	0
																		4400	0	0	0	0	0	0	0
																		4410	0	0	0	0	0	0	0
																		4420	0	0	0	0	0	0	0
																		4430	0	0	0	0	0	0	0
																		4440	0	0	0	0	0	0	0
																		4450	0	0	0	0	0	0	0
																		4460	0	0	0	0	0	0	0
																		4470	0	0	0	0	0	0	0
																		4480	0	0	0	0	0	0	0
																		4490	0	0	0	0	0	0	0
																		4500	0	0	0	0	0	0	0
																		4510	0	0	0	0	0	0	0
																		4520	0	0	0	0	0	0	0
																		4530	0	0	0	0	0	0	0
																		4540	0	0	0	0	0	0	0
																		4550	0	0	0	0	0	0	0
																		4560	0	0	0	0	0	0	0
																		4570	0	0	0	0	0	0	0
																		4580	0	0	0	0	0	0	0
																		4590	0	0	0	0	0	0	0
																		4600	0	0	0	0	0	0	0
[truncated: 7 more columns]
