# Supplementary material for: Lipolysis of bone marrow adipocytes is required to fuel bone and the marrow niche during energy deficits
Source: eLife journal article supplement (doi:10.7554/elife.78496), 2022-06-22
Supplement: supp [file Source data set_Figure 3_supplement 1.xlsx]

## Sheet: Sheet1
Figure 3 - figure supplement 1A				Figure 3 - figure supplement 1B
	BW			GTT
	Pnpla2 +/+	Pnpla2 -/-		Min	Pnpla2+/+						Pnpla2-/-
	33.01	29.72		0	71	81	94	85	107		68	95	94	100	104	74
	29.22	33.85		15	192	135	318	194	242		211	264	230	289	245	185
	30.02	29.23		30	213	144	325	204	295		220	233	218	317	282	162
	31.74	29.04		60	165	125	195	157	171		199	164	147	214	174	135
	26.4	28.34		90	123	113	173	129	142		143	126	120	167	151	111
		30.22		120	98	111	160	112	128		120	137	113	136	108	119
Figure 3 - figure supplement 1C			Figure 3 - figure supplement 1D			Figure 3 - figure supplement 1E
	sWAT			eWAT			Liver
	Pnpla2 +/+	Pnpla2 -/-		Pnpla2 +/+	Pnpla2 -/-		Pnpla2 +/+	Pnpla2 -/-
	155.3	148.2		463.1	238		1901.8	1649.4
	302.7	275.3		610.6	784.3		1460.4	1809.9
	275.2	158.3		529.7	255.4		1402.7	1064.5
	321.9	255.2		693.8	761.7		1098.6	1362.2
	223	324.6		412.6	483.9		1474	1409.1
		272.3			576.2			1426.5
Figure 3 - figure supplement 1G
	Proximal Tib rBMAT			GP to T/B J			DisTib cBMAT
	Pnpla2 +/+	Pnpla2 -/-		Pnpla2 +/+	Pnpla2 -/-		Pnpla2 +/+	Pnpla2 -/-
	0.16	6.48		0.43	6.73		3.61	15.58
	5.16	24.99		1.06	7.47		26.5	10.4
	7.73	3.63		2.53	3.44		28.69	20.15
	0.86	36.7		6.26	15.47		17.59	29.91
	4.05	16.76		0.68	6.67		20.14	28.89
		*one broken			*one broken			*one broken
Figure 3 - figure supplement 1H
	Serum glycerol			Serum NEFA
	Pnpla2 +/+	Pnpla2 -/-		Pnpla2 +/+	Pnpla2 -/-
	419.193	191.652		81.8048	121.462
	136.449	93.3646		98.6088	125.999
	141.835	124.332		146.5	166.833
	206.462	152.606		96.0882	107.683
	315.521	337.063		203.298	200.273
	129.717	172.802		88.1904	151.373
	214.541	78.5542		116.253	86.0058
	109.521			102.138
	* An independent cohort from above
Figure 3 - figure supplement 1I
	BM Glycerol/protein			BM NEFA/protein
	Pnpla2 +/+	Pnpla2 -/-		Pnpla2 +/+	Pnpla2 -/-
	20.8911	22.7407		44.8502	50.2187
	18.3011	17.7315		44.7376	36.931
	22.8018	22.3852		53.754	39.8126
	21.4305	18.5138		56.8961	32.413
	18.9842	16.9008		47.8527	50.583
	18.7355	19.9124		49.2282	46.6117
	* An independent cohort for BM supernant collection
Figure 3 - figure supplement 1J
	Days	Pnpla2+/+									Pnpla2-/-
	0	38.3	26.8	27.1	29.6	30.7	25.4	32.8	29.3		32.3	27.3	33.4	27.8	30.7	35.2	27.6	27.2	27.9
	3	29.2	24.3	24	26.5	27.3	22.8	28.2	25.2		29.8	25.6	29.8	26.2	28.7	31.5	25	24.1	25.2
	6	28.3	23.1	22.8	25	26.8	21.6	26.3	23.3		28.2	24.6	27.8	25.1	27	30.1	24.3	23	24
	9	27.6	22.8	22.8	24.8	25.8	20.4	26.1	22.3		27.7	24.8	26.8	23.8	26.3	29.4	23.6	22.4	23.6
	12	27.1	22.6	22.2	23.1	25.8	19.8	25.8	22.6		27.6	24.6	26.5	23.7	25.2	28.7	23	22.2	22.9
	15	24.9	21.8	21.7	22	24.8	19.3	25.1	21.8		26.5	23.5	25.6	22.5	24.2	28.4	22	21.8	22.4
	18	25.1	22.4	21.9	21.6	25.1	19.7	24.9	22.2		26.5	23.6	25.6	22.7	24.6	28.6	22.6	22.2	22.3
	21	24.8	21.8	21.4	21	24.6	19	died	21.7		25.7	22.9	24.4	21.8	23.7	27.5	21.6	21.7	21.7
	24	24.6	21.6	21.9	20.5	24.6	19.1		21.9		25.8	23.1	24.7	21.6	23.6	27.6	22	21.3	21.9
	27	24.4	21.7	21.3	20.2	23.9	18.8		21.8		25.3	22.5	24.9	21.3	23.6	27	21.8	20.7	20.9
	30	23.3	21.2	21.6	19.9	23.6	18.3		21.2		24.8	21.6	24.2	20.9	23.3	26.6	20.8	20.1	20.6
	33	23.47	21.62	21.51	20.11	24.01	18.95		21.58		25.5	22.3	24.23	21.04	24.08	25.85	22.5	20.45	21.19
Figure 3 - figure supplement 1K
	Min	Pnpla2+/+							Pnpla2-/-
	0	76	91	72	50	74	91		87	78	86	58	80	71	86	104
	15	188	242	223	171	180	213		227	104	148	187	244	147	118	229
	30	147	315	210	220	178	169		215	107	122	265	244	139	117	217
	60	117	173	136	205	92	75		130	106	103	150	124	93	115	156
	90	93	148	93	161	88	63		91	87	125	124	119	93	111	126
Figure 3 - figure supplement 1L			Figure 3 - figure supplement 1M			Figure 3 - figure supplement 1N
	sWAT			eWAT			Liver
	Pnpla2 +/+	Pnpla2 -/-		Pnpla2 +/+	Pnpla2 -/-		Pnpla2 +/+	Pnpla2 -/-
	229.9	243.3		125.4	195.2		1210.7	1317
	216	162.1		228.3	141.1		979.5	967.4
	184.7	232.7		115.9	113.1		985.1	1045.3
	93.8	107.5		32.2	42.8		826.4	868.1
	235.6	209.3		291	193.6		1087.1	993.4
	112.7	399.1		39.1	486.2		755.1	1289.3
	182.8	244.7		106.8	136		899	1042.5
		101.3			54.9			792.5
Figure 3 - figure supplement 1P
	Proximal Tib rBMAT			GP to T/B j			DisTib cBMAT
	Pnpla2 +/+	Pnpla2 -/-		Pnpla2 +/+	Pnpla2 -/-		Pnpla2 +/+	Pnpla2 -/-
	53.5	52.17		16.15	34.57		30.37	37.58
	34.39	54.68		28.3	31.3		39.41	37.24
	55.01	56.05		30.88	35.14		35.86	30.93
	32.73	44.31		24.15	18.18		47.52	36.76
	24.96	36.7		15.4	17.55		31.74	36.78
	56.74	40.64		33.5	21.34		*broken	31.14
	23.98	52.77		14.3	35.53		35.24	42.36
Figure 3 - figure supplement 1Q
	Serum glycerol			Serum NEFA
	Pnpla2 +/+	Pnpla2 -/-		Pnpla2 +/+	Pnpla2 -/-
	401.69	373.416		155.238	135.41
	291.285	306.096		259.087	203.466
	464.971	244.161		300.593	162.8
	258.972	303.403		151.709	201.785
	324.945	311.481		162.464	188.342
	233.39	497.285		176.747	267.825
	202.423	330.331		148.181	171.202
	514.788	376.109		192.207	241.443
	351.873			205.986
	* An independent cohort from above
Figure 3 - figure supplement 1R
	BM Glycerol/protein			BM NEFA/protein
	Pnpla2 +/+	Pnpla2 -/-		Pnpla2 +/+	Pnpla2 -/-
	30.1409	24.2083		75.965	66.7761
	21.8475	20.1226		81.2648	56.9952
	33.9028	11.734		104.774	65.7871
	18.7392	12.7566		94.3597	87.5336
	21.9948	18.7444		75.4866	50.9704
	21.0052	29.9919		71.5514	75.2068
	21.8468			69.0103
	* An independent cohort for BM supernant collection
