# Supplementary figures and images for: Lipolysis of bone marrow adipocytes is required to fuel bone and the marrow niche during energy deficits
Source: eLife journal article supplement (doi:10.7554/elife.78496), 2022-06-22

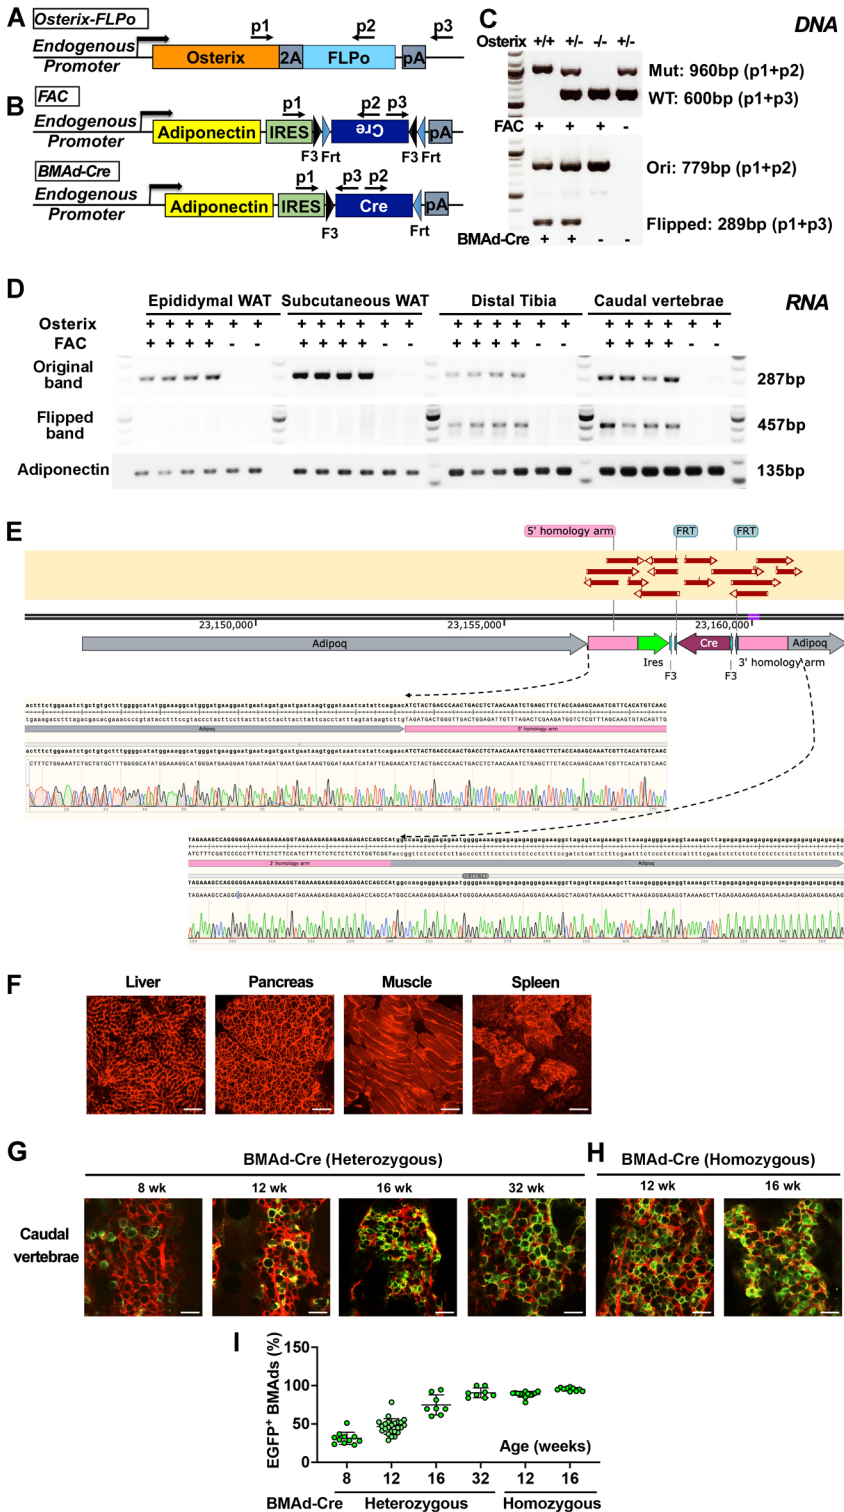

Supplement: supp [file elife_poa_e78496_Figure_1_figure_supplement_1.pdf › elife_poa_e78496_Figure_1_figure_supplement_1.pdf]

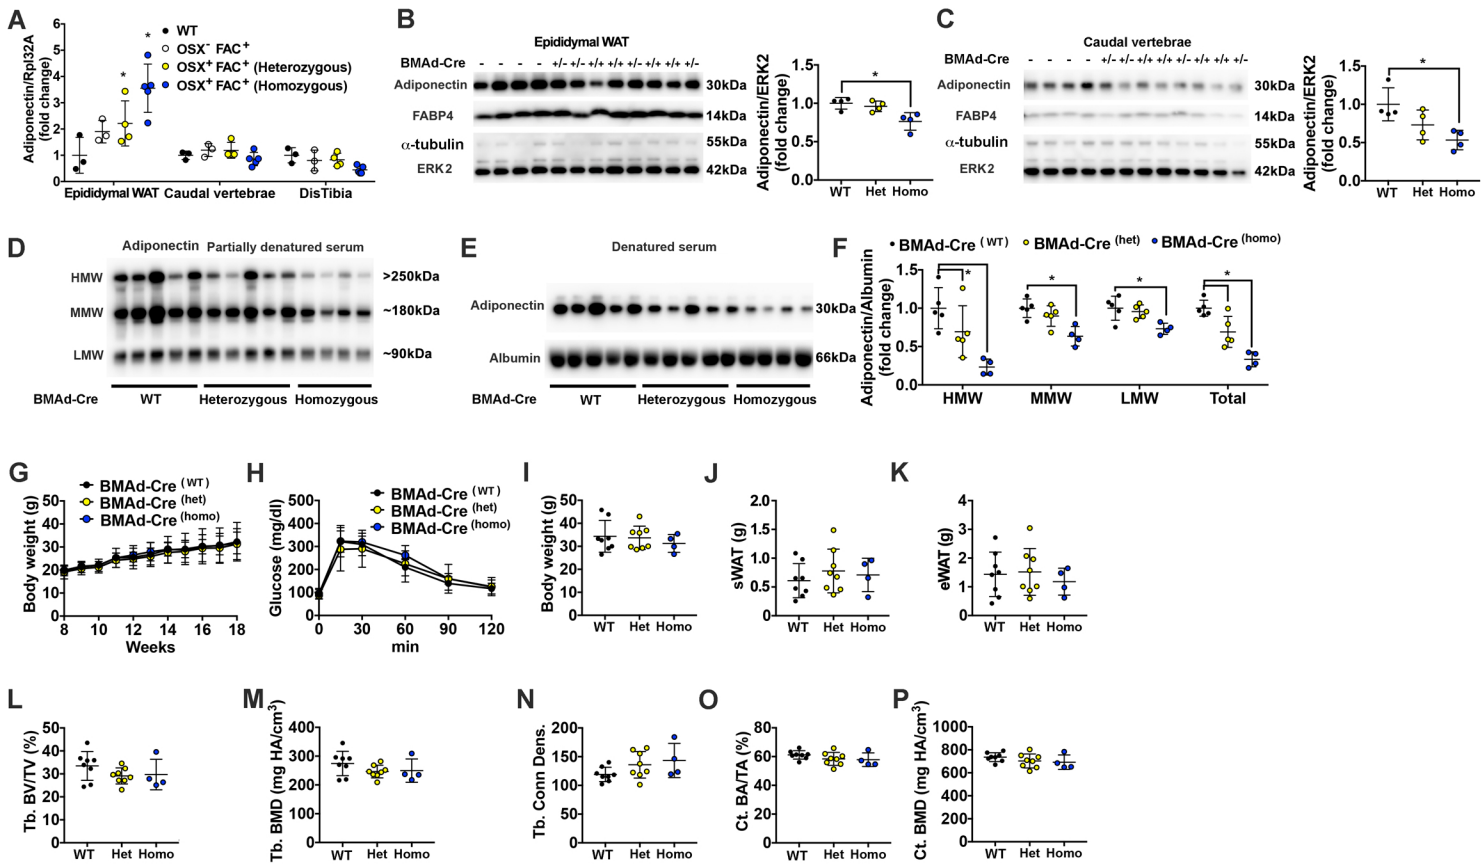

Supplement: supp [file elife_poa_e78496_Figure_1_figure_supplement_2.pdf › elife_poa_e78496_Figure_1_figure_supplement_2.pdf]

# Ad libitum

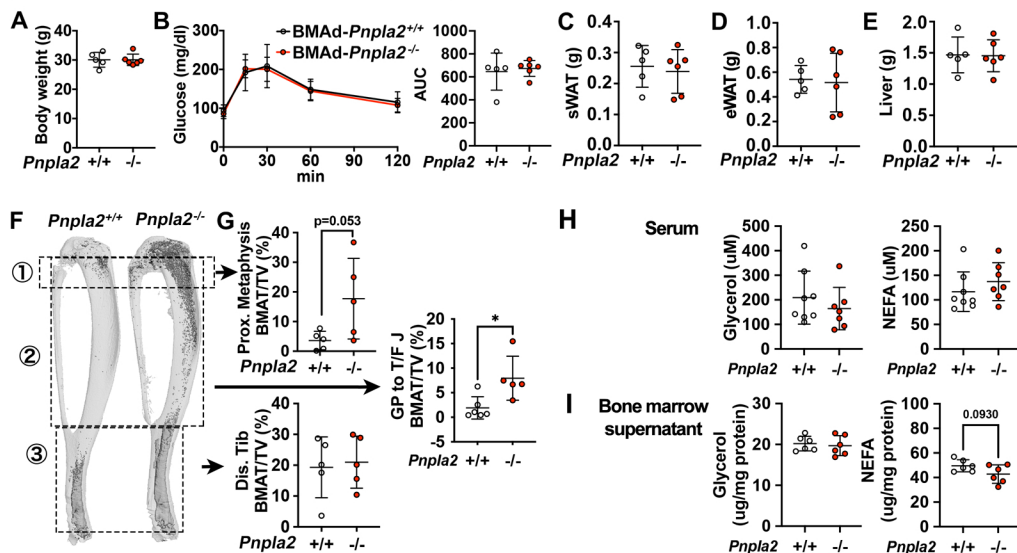

# Caloric Restriction

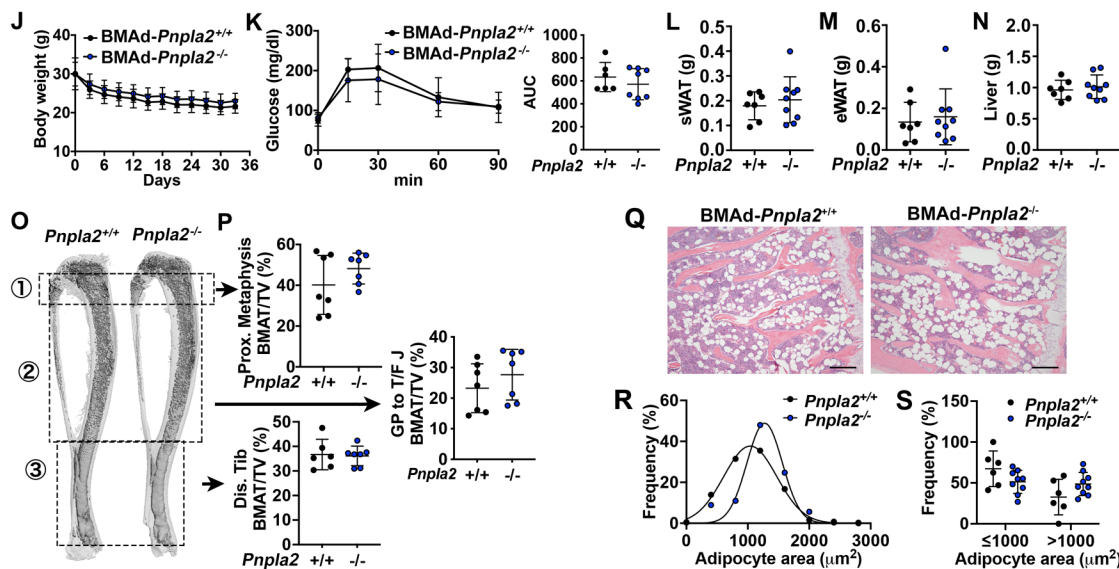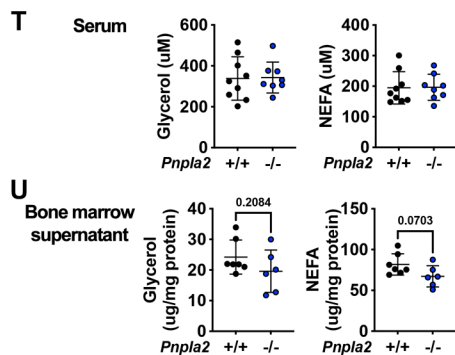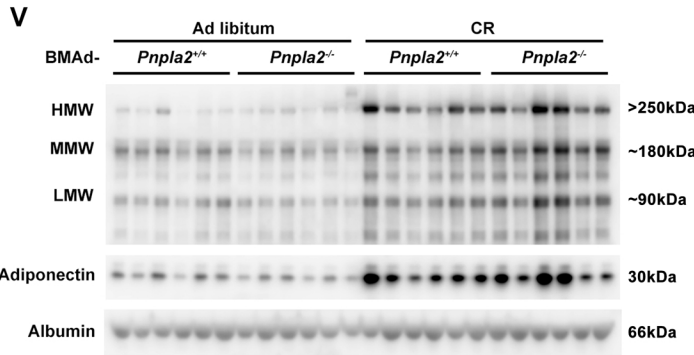

Supplement: supp [file elife_poa_e78496_Figure_3_figure_supplement_1.pdf › elife_poa_e78496_Figure_3_figure_supplement_1.pdf]

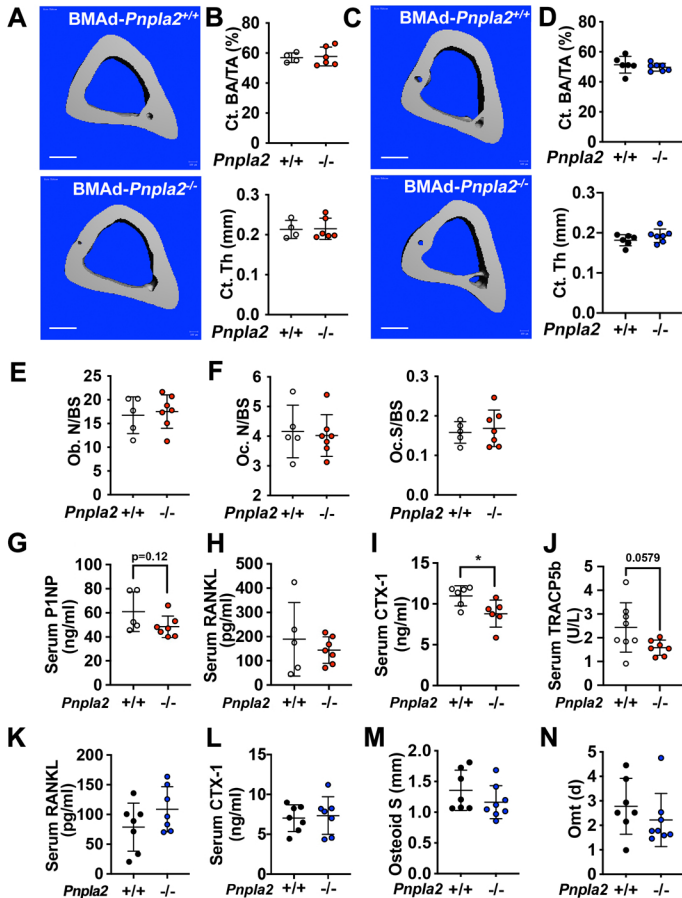

Supplement: supp [file elife_poa_e78496_Figure_3_figure_supplement_2.pdf › elife_poa_e78496_Figure_3_figure_supplement_2.pdf]

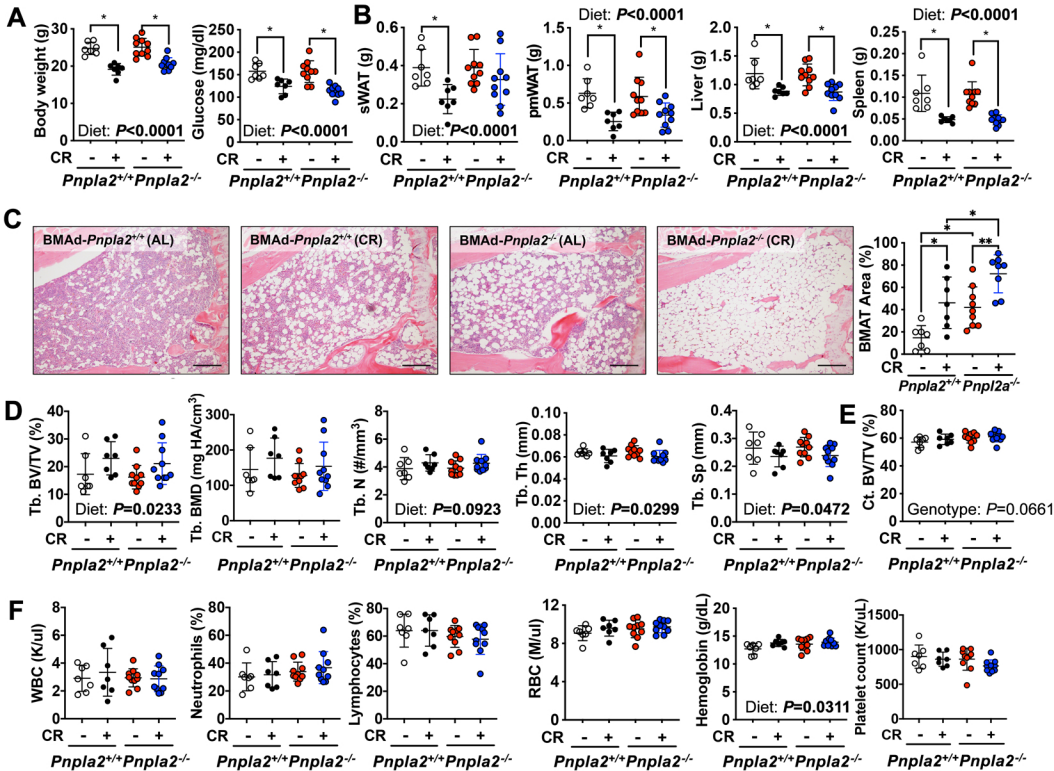

Supplement: supp [file elife_poa_e78496_Figure_3_figure_supplement_3.pdf › elife_poa_e78496_Figure_3_figure_supplement_3.pdf]

**A**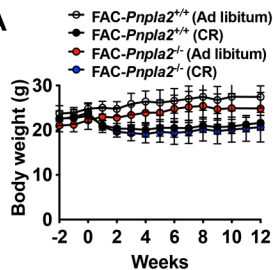**B**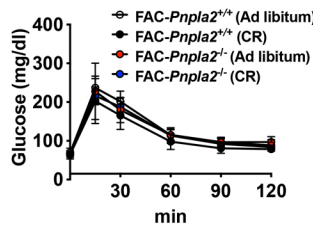**C**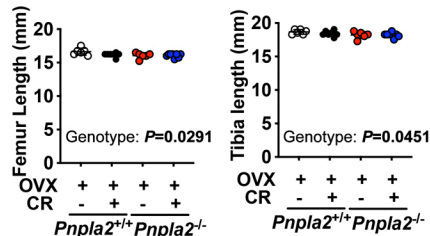**D**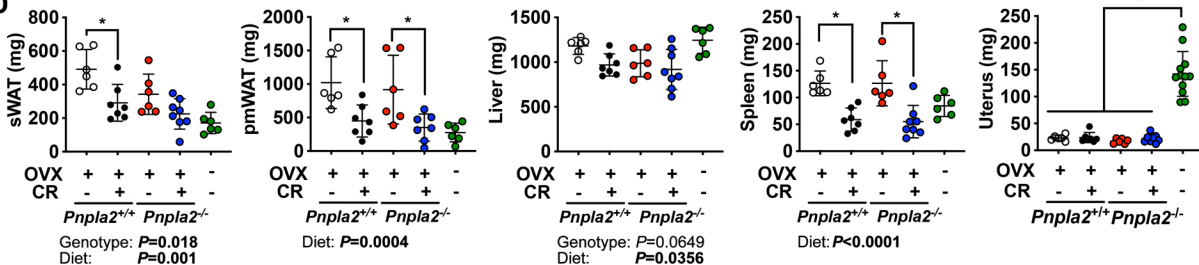**E**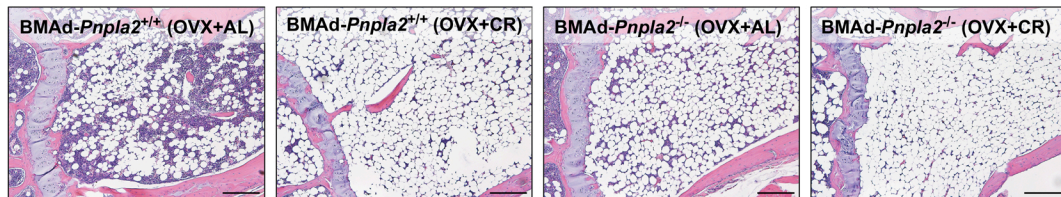**F**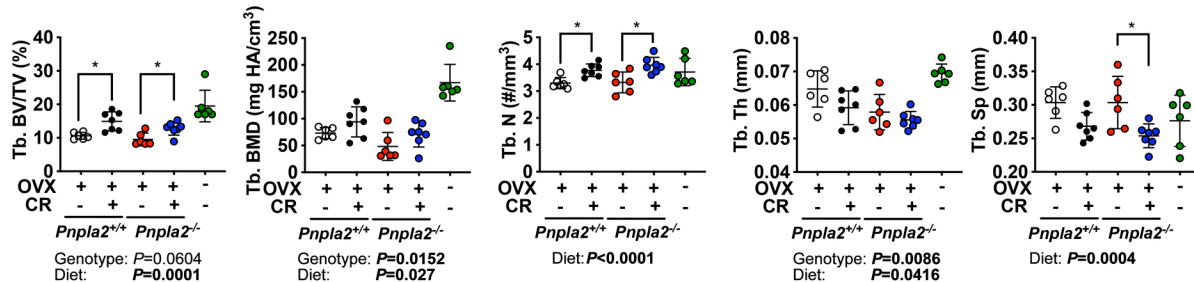

Supplement: supp [file elife_poa_e78496_Figure_3_figure_supplement_4.pdf › elife_poa_e78496_Figure_3_figure_supplement_4.pdf]

**A****HSPC Gating Scheme**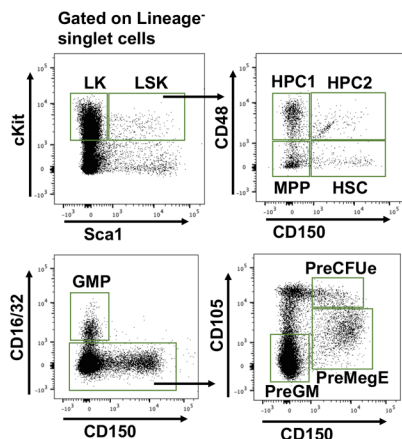**B****Mature Leukocyte Gating Scheme**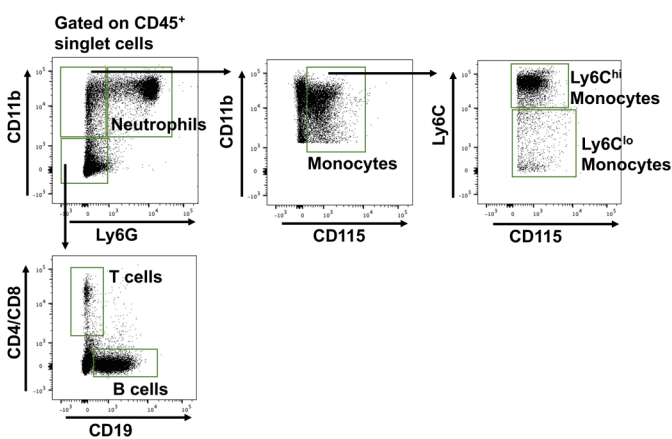**C**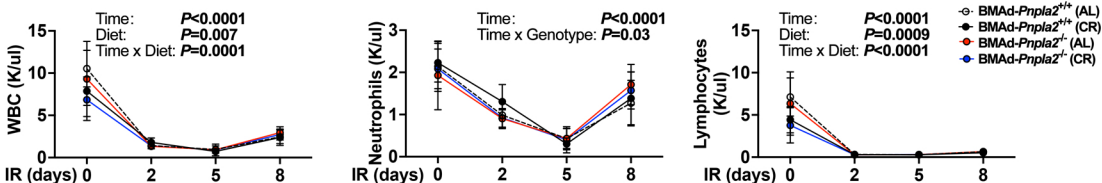**D**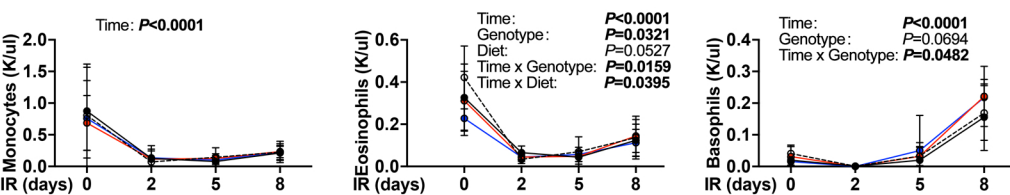**E**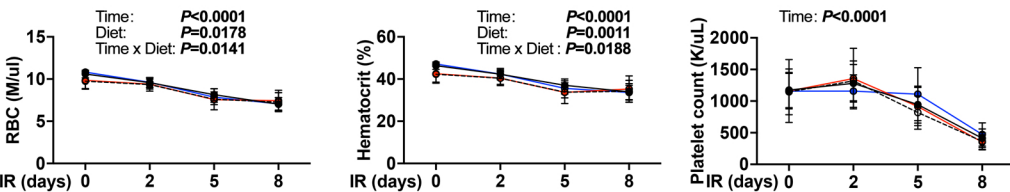**F**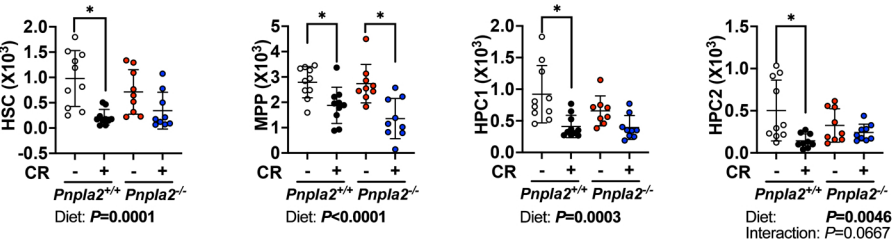**G**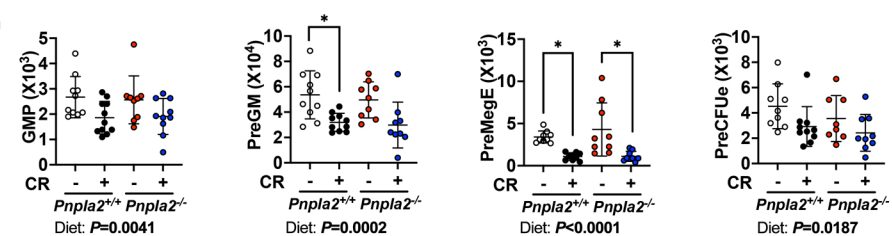

Supplement: supp [file elife_poa_e78496_Figure_4_figure_supplement_1.pdf › elife_poa_e78496_Figure_4_figure_supplement_1.pdf]

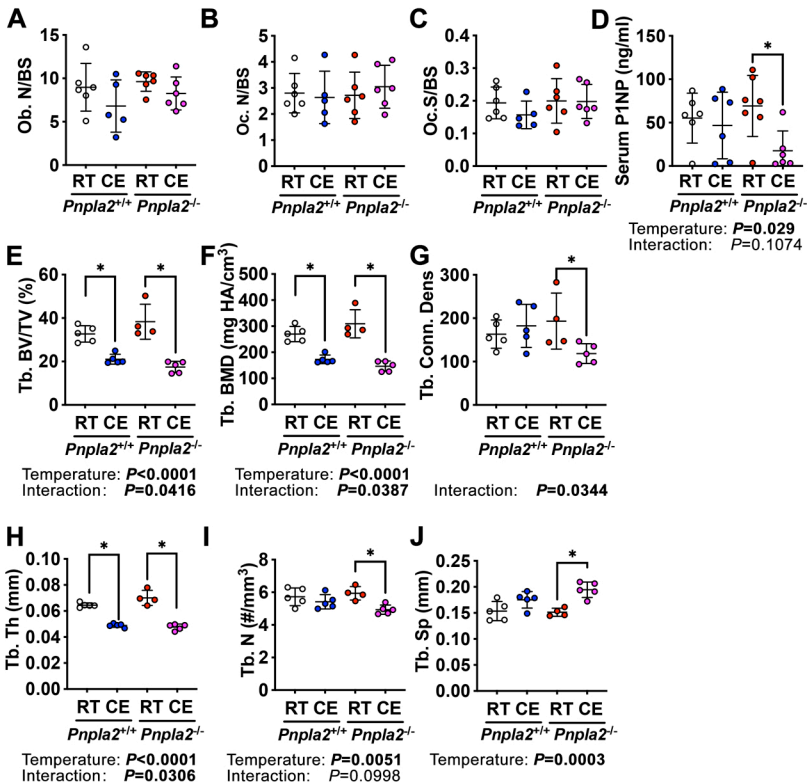

Supplement: supp [file elife_poa_e78496_Figure_6_figure_supplement_1.pdf › elife_poa_e78496_Figure_6_figure_supplement_1.pdf]
